# Supplementary material for: Alzheimer’s disease progression characterized by alterations in the molecular profiles and biogenesis of brain extracellular vesicles
Source: Alzheimers Res Ther. 2020 May 8;12:54. doi: 10.1186/s13195-020-00623-4 (PMC7210691; doi:10.1186/s13195-020-00623-4)
Supplement: Supplementary file 4 — Additional file 4. [file 13195_2020_623_MOESM4_ESM.xlsx]

## Sheet: BW_TMT6_ReplicateA
Alzheimer’s disease progression characterized by alterations in the molecular profiles and biogenesis of brain extracellular vesicles
Xavier Gallart-Palau, Xue Guo, Aida Serra, Siu Kwan Sze
Supplementary information
Supplementary data set 3. List of proteins identified from whole brain of Alzheimer´s patients (braak stages 3- 6, as AD3 to AD6) and age-matched controls. List of proteins for every tecnical replicate are included in separated tabs.
Accession	Protein Description	# PSMs	MW [kDa]	Abundance Ratio: (F1, 127) / (F1, 126)	Abundance Ratio: (F1, 128) / (F1, 126)	Abundance Ratio: (F1, 129) / (F1, 126)	Abundance Ratio: (F1, 130) / (F1, 126)	Abundance Ratio: (F1, 131) / (F1, 126)
X6RLX0	ELKS/Rab6-interacting/CAST family member 1 OS=Homo sapiens GN=ERC1 PE=1 SV=1	32	128.4	1.219	1.034	1.174	0.978	0.963
X6RKN2	Neurofascin (Fragment) OS=Homo sapiens GN=NFASC PE=1 SV=1	374	131.1	1.161	1.113	1.041	0.982	1.046
X6RAY8	39S ribosomal protein L4, mitochondrial OS=Homo sapiens GN=MRPL4 PE=1 SV=1	6	39.6	0.757	1.18	0.687	0.485	0.546
X6RAL5	Histone deacetylase complex subunit SAP18 OS=Homo sapiens GN=SAP18 PE=1 SV=1	2	19.5	0.952	1.196	0.685	0.632	0.843
X6R8A1	Carboxypeptidase OS=Homo sapiens GN=CTSA PE=1 SV=1	4	56.2	0.906	0.98	1.092	0.964	1.108
X6R7I6	Pancreatic progenitor cell differentiation and proliferation factor OS=Homo sapiens GN=PPDPF PE=1 SV=1	4	14.7	1.768	1.25	1.256	1.148	1.4
X6R4W8	BUB3-interacting and GLEBS motif-containing protein ZNF207 OS=Homo sapiens GN=ZNF207 PE=1 SV=1	4	52.6	0.425	0.511	0.483	0.301	0.455
X6R3P0	Slit homolog 2 protein OS=Homo sapiens GN=SLIT2 PE=1 SV=1	2	171.2	1.339	0.791	0.836	0.935	0.865
X5DR09	General transcription factor IIi isoform A (Fragment) OS=Homo sapiens GN=GTF2I PE=2 SV=1	18	112.3	0.935	0.928	0.851	0.801	0.798
X5DR03	Glutathione S-transferase mu 1 isoform B (Fragment) OS=Homo sapiens GN=GSTM1 PE=2 SV=1	45	25.7	0.96	1.183	1.176	1.677	0.84
X5DNV3	Neuroligin 3 isoform A (Fragment) OS=Homo sapiens GN=NLGN3 PE=2 SV=1	10	93.8	0.947	0.921	0.922	0.823	0.802
X5DNM4	Lactoylglutathione lyase (Fragment) OS=Homo sapiens GN=GLO1 PE=2 SV=1	23	20.8	1.209	1.169	1.011	1.07	1.061
X5DNL6	Gamma-aminobutyric acid A receptor beta 1 isoform A (Fragment) OS=Homo sapiens GN=GABRB1 PE=2 SV=1	23	54.2	0.519	0.507	0.42	0.377	0.315
X5DNI1	Collapsin response mediator protein 1 isoform A (Fragment) OS=Homo sapiens GN=CRMP1 PE=2 SV=1	239	74.2	1.044	0.887	0.935	0.898	0.814
X5DNA9	HCG2002594, isoform CRA_d (Fragment) OS=Homo sapiens GN=SEPT5 PE=2 SV=1	131	42.8	1.174	1.033	1.012	0.893	0.797
X5D9D2	Tuberous sclerosis 1 isoform A (Fragment) OS=Homo sapiens GN=TSC1 PE=2 SV=1	22	129.7	1.319	0.802	0.811	0.864	0.944
X5D963	Myotubularin related protein 10 isoform C (Fragment) OS=Homo sapiens GN=MTMR10 PE=2 SV=1	6	88.2	1.091	1.28	1.201	1.505	1.723
X5D945	Harvey rat sarcoma viral oncoprotein isoform A (Fragment) OS=Homo sapiens GN=HRAS PE=2 SV=1	48	21.3	1.121	1.161	1.105	1.171	1.204
X5D8X5	Cadherin 10 type 2 isoform A (Fragment) OS=Homo sapiens GN=CDH10 PE=2 SV=1	28	88.4	0.919	0.965	0.875	0.765	0.664
X5D8T4	Aldehyde dehydrogenase 5 family member A1 isoform B (Fragment) OS=Homo sapiens GN=ALDH5A1 PE=2 SV=1	83	57.2	0.811	1.832	1.026	1.228	1.351
X5D7F5	Gamma-aminobutyric acid A receptor alpha 4 isoform A (Fragment) OS=Homo sapiens GN=GABRA4 PE=2 SV=1	8	61.6	1.012	1.009	0.976	0.961	0.961
X5D2L1	Hydroxysteroid 11-beta dehydrogenase 1 isoform A (Fragment) OS=Homo sapiens GN=HSD11B1 PE=2 SV=1	2	32.4	1.243	1.164	1.054	1.337	1.721
X5CN18	Superoxide dismutase (Fragment) OS=Homo sapiens GN=SOD1 PE=4 SV=1	20	3.5	1.277	1.33	1.11	0.625	0.761
W9AAG4	MHC class I antigen (Fragment) OS=Homo sapiens GN=HLA-A PE=3 SV=1	9	20.9
W0S1J7	PJA2/FER fusion protein OS=Homo sapiens GN=Pe7Fe14 PE=2 SV=1	16	96.2	1.032	1.045	0.915	0.703	0.797
V9HWK4	Epididymis luminal protein 162 OS=Homo sapiens GN=HEL162 PE=2 SV=1	14	73.6	0.86	0.96	0.892	0.78	0.778
V9HWK2	Epididymis luminal protein 114 OS=Homo sapiens GN=HEL114 PE=2 SV=1	129	123.7	1.048	1.039	1.041	1.243	1.135
V9HWK0	Signal recognition particle subunit SRP72 OS=Homo sapiens GN=HEL103 PE=2 SV=1	34	74.6	0.898	0.903	0.906	0.822	0.86
V9HWJ5	Nicotinate-nucleotide pyrophosphorylase [carboxylating] OS=Homo sapiens GN=HEL-S-90n PE=2 SV=1	6	30.8	0.967	0.98	1.046	1.192	1.092
V9HWJ1	Glutathione synthetase OS=Homo sapiens GN=HEL-S-64p PE=2 SV=1	33	52.4	0.986	0.98	1.043	1.066	1.069
V9HWI3	Cathepsin D (Lysosomal aspartyl peptidase), isoform CRA_a OS=Homo sapiens GN=HEL-S-130P PE=2 SV=1	126	44.5	1.083	1.011	1.217	1.414	1.252
V9HWH2	Creatine kinase brain isoform 1 OS=Homo sapiens GN=HEL-S-29 PE=2 SV=1	640	42.6	0.952	0.887	0.949	0.887	0.871
V9HWH1	Epididymis luminal protein 57 OS=Homo sapiens GN=HEL57 PE=2 SV=1	10	42.7	0.991	0.922	0.909	1.034	1.086
V9HWG3	Epididymis secretory protein Li 45 OS=Homo sapiens GN=HEL-S-45 PE=2 SV=1	10	77.3	0.918	0.839	1.17	1.038	1.059
V9HWE9	Epididymis secretory protein Li 22 OS=Homo sapiens GN=HEL-S-22 PE=2 SV=1	115	23.3	1.127	0.968	1.152	1.259	1.344
V9HWE8	Epididymis secretory sperm binding protein Li 47e OS=Homo sapiens GN=HEL-S-47e PE=2 SV=1	28	23.2	1.116	0.947	1.003	0.926	0.949
V9HWE1	Epididymis luminal protein 113 OS=Homo sapiens GN=HEL113 PE=2 SV=1	289	53.6	1.062	1.059	1.181	1.953	1.253
V9HWE0	Annexin OS=Homo sapiens GN=HEL-S-7 PE=2 SV=1	134	35.9	0.937	0.977	1.138	1.674	1.529
V9HWD8	Epididymis secretory sperm binding protein Li 163pA OS=Homo sapiens GN=HEL-S-163pA PE=2 SV=1	8	54.2	1.251	1.144	1.221	1.189	1.237
V9HWD3	Epididymis luminal protein 117 OS=Homo sapiens GN=HEL117 PE=2 SV=1	14	54.8	0.876	1.048	0.935	1.028	0.879
V9HWC9	Superoxide dismutase [Cu-Zn] OS=Homo sapiens GN=HEL-S-44 PE=2 SV=1	126	15.9	1.187	0.988	1.068	1.1	1.171
V9HWC7	Epididymis secretory sperm binding protein Li 128m OS=Homo sapiens GN=HEL-S-128m PE=2 SV=1	107	25	0.946	1.001	1.158	1.537	1.314
V9HWC5	Epididymis secretory protein Li 36 OS=Homo sapiens GN=HEL-S-36 PE=2 SV=1	55	31.8	0.878	0.976	0.923	1.121	1.039
V9HWC4	Epididymis secretory sperm binding protein Li 132P OS=Homo sapiens GN=HEL-S-132P PE=2 SV=1	14	13.8	1.166	0.925	1.163	1.121	1.11
V9HWB8	Pyruvate kinase OS=Homo sapiens GN=HEL-S-30 PE=1 SV=1	427	57.9	0.938	1.073	1.113	1.549	1.63
V9HWB4	Epididymis secretory sperm binding protein Li 89n OS=Homo sapiens GN=HEL-S-89n PE=2 SV=1	278	72.3	1.057	1.106	1.001	1.023	0.999
V9HWA9	Epididymis secretory sperm binding protein Li 62p OS=Homo sapiens GN=HEL-S-62p PE=2 SV=1	117	187	1.117	1.068	1.255	1.714	1.466
V9HWA6	Epididymis luminal protein 32 OS=Homo sapiens GN=HEL32 PE=2 SV=1	53	18.5	0.892	0.816	0.933	0.944	0.895
V9HW91	Epididymis secretory sperm binding protein Li 8a OS=Homo sapiens GN=HEL-S-8a PE=2 SV=1	25	30.6	1.098	0.974	1.308	1.182	1.101
V9HW90	Epididymis luminal protein 75 OS=Homo sapiens GN=HEL-75 PE=2 SV=1	28	56.2	1.023	1.008	1.088	1.375	1.197
V9HW88	Calreticulin, isoform CRA_b OS=Homo sapiens GN=HEL-S-99n PE=2 SV=1	84	48.1	1.216	1.093	1.312	1.224	1.311
V9HW87	Abhydrolase domain containing 14B, isoform CRA_a OS=Homo sapiens GN=HEL-S-299 PE=2 SV=1	8	22.3	0.871	0.895	0.99	1.303	1.104
V9HW80	Epididymis luminal protein 220 OS=Homo sapiens GN=HEL-S-70 PE=2 SV=1	299	89.3	1.257	1.217	1.236	1.264	1.289
V9HW63	Epididymis secretory sperm binding protein Li 97n OS=Homo sapiens GN=HEL-S-97n PE=2 SV=1	22	30.5	0.881	0.976	1.021	1.102	1.228
V9HW62	Lactoylglutathione lyase OS=Homo sapiens GN=HEL-S-74 PE=2 SV=1	25	20.7	1.058	0.977	0.988	0.945	0.918
V9HW53	Dimethylarginine dimethylaminohydrolase 2, isoform CRA_a OS=Homo sapiens GN=HEL-S-277 PE=1 SV=1	41	29.6	1.207	1.06	1.303	1.469	1.571
V9HW48	SH3 domain-binding glutamic acid-rich-like protein OS=Homo sapiens GN=HEL-S-115 PE=2 SV=1	37	12.8	0.947	0.965	1.012	1.192	1.259
V9HW44	Epididymis secretory protein Li 303 OS=Homo sapiens GN=HEL-S-303 PE=2 SV=1	10	25.6	0.779	0.791	0.875	0.964	0.874
V9HW43	Epididymis secretory protein Li 102 OS=Homo sapiens GN=HEL-S-102 PE=2 SV=1	77	22.8	1.287	1.038	1.26	1.737	1.509
V9HW41	Epididymis secretory protein Li 71 OS=Homo sapiens GN=HEL-S-71 PE=2 SV=1	62	17.1	0.954	0.942	0.948	0.833	0.797
V9HW37	Epididymis secretory protein Li 69 OS=Homo sapiens GN=HEL-S-69 PE=1 SV=1	148	59.6	0.912	0.91	0.952	0.988	0.983
V9HW31	ATP synthase subunit beta OS=Homo sapiens GN=HEL-S-271 PE=1 SV=1	576	56.5	1.033	1.206	0.998	0.914	0.957
V9HW29	Kinesin-like protein OS=Homo sapiens GN=HEL-S-61 PE=2 SV=1	123	109.6	1.084	1.007	1.072	1.114	1.249
V9HW26	ATP synthase subunit alpha OS=Homo sapiens GN=HEL-S-123m PE=2 SV=1	518	59.7	1.021	1.146	0.96	0.898	0.974
V9HW22	Epididymis luminal protein 33 OS=Homo sapiens GN=HEL-S-72p PE=2 SV=1	708	70.9	0.962	0.947	0.946	1	0.996
V9HW12	Epididymis secretory sperm binding protein Li 2a OS=Homo sapiens GN=HEL-S-2a PE=2 SV=1	117	21.9	0.989	0.941	1.053	1.094	1.183
V9HW09	Epididymis secretory sperm binding protein Li 91n OS=Homo sapiens GN=HEL-S-91n PE=2 SV=1	18	39.6	0.853	0.875	0.855	0.95	0.846
V9HW04	Serine/threonine-protein phosphatase OS=Homo sapiens GN=HEL-S-80p PE=2 SV=1	51	37.2	0.96	0.932	1.03	1.142	1.082
V9HVY8	Epididymis secretory protein Li 88 OS=Homo sapiens GN=HEL-S-88 PE=2 SV=1	2	39.7	1.616	1.415	1.26	1.225	1.56
V9HVY1	Epididymis secretory sperm binding protein Li 78p OS=Homo sapiens GN=HEL-S-78p PE=2 SV=1	118	55.9	1.329	1.084	1.265	2.213	1.681
V9GZN0	Uncharacterized protein (Fragment) OS=Homo sapiens PE=3 SV=1	12	5	0.736	0.873	0.863	1.168	0.823
V9GZ56	U6 snRNA-associated Sm-like protein LSm4 (Fragment) OS=Homo sapiens GN=LSM4 PE=1 SV=1	6	25.7	1.231	1.18	1.186	1.33	1.151
V9GYM8	Rho guanine nucleotide exchange factor 2 OS=Homo sapiens GN=ARHGEF2 PE=1 SV=1	61	116	0.957	0.936	0.867	0.799	0.739
V9GYM3	Apolipoprotein A-II OS=Homo sapiens GN=APOA2 PE=1 SV=1	18	14.9	0.944	0.891	1.01	0.811	1.068
U6FSN9	Tyrosine-protein kinase receptor OS=Homo sapiens GN=Mprip-Ntrk1 fusion gene PE=2 SV=1	20	150.4	0.995	0.873	0.85	0.701	0.667
U4PSC4	Mediator complex subunit 4 (Fragment) OS=Homo sapiens GN=MED4 PE=2 SV=1	2	35.3	0.972	1.073	0.877	1.13	0.957
U3PXP0	Alpha globin chain (Fragment) OS=Homo sapiens GN=HBA2 PE=3 SV=1	98	5.7	0.684	0.69	0.723	1.056	0.876
U3KQP3	NADH dehydrogenase [ubiquinone] 1 alpha subcomplex subunit 13 (Fragment) OS=Homo sapiens GN=NDUFA13 PE=4 SV=2	14	8.7	0.707	1.074	0.857	0.917	0.886
U3KQL2	Acylphosphatase OS=Homo sapiens GN=ACYP2 PE=1 SV=1	12	19.6	0.899	0.913	0.946	1.146	1.23
U3KQK5	Uncharacterized protein OS=Homo sapiens PE=4 SV=1	45	17	0.946	1.067	0.952	0.96	0.991
U3KQK0	Histone H2B OS=Homo sapiens GN=HIST1H2BN PE=1 SV=1	138	18.8	1.123	1.099	1.182	1.206	1.108
U3KQB3	Casein kinase I isoform gamma-1 OS=Homo sapiens GN=CSNK1G1 PE=1 SV=1	8	54.4	0.909	0.955	1.016	0.999	1.047
T2C6S4	WWC family member 3 OS=Homo sapiens GN=WWC3 PE=2 SV=1	8	136.7	0.815	0.958	0.81	1.15	0.939
T1SGS4	Mutant microtubule-associated protein tau (Fragment) OS=Homo sapiens GN=MAPT PE=4 SV=1	2	2.9	0.66	0.986	0.611	0.523	0.415
S4T6K9	MHC class I antigen (Fragment) OS=Homo sapiens GN=HLA-C PE=3 SV=1	7	21.1
S4R400	Focadhesin OS=Homo sapiens GN=FOCAD PE=1 SV=2	4	136.3	1.126	1.161	0.859	0.735	0.741
S4R3N1	Protein HSPE1-MOB4 OS=Homo sapiens GN=HSPE1-MOB4 PE=3 SV=1	48	29.7
S4R3E2	DnaJ homolog subfamily C member 12 OS=Homo sapiens GN=DNAJC12 PE=1 SV=1	4	26.6	1.18	0.879	1.102	0.936	0.935
S4R369	39S ribosomal protein L37, mitochondrial OS=Homo sapiens GN=MRPL37 PE=1 SV=1	4	54.9	0.711	0.829	0.778	0.763	0.837
S4R347	Formin-binding protein 1-like OS=Homo sapiens GN=FNBP1L PE=1 SV=1	6	70.5	0.874	1.266	1.093	1.077	0.868
R4GMX3	Protein COMMD3-BMI1 OS=Homo sapiens GN=COMMD3-BMI1 PE=4 SV=1	9	53.3	1.022	1.045	1.135	1.25	1.368
R4GMQ1	Lysine-specific histone demethylase 1A (Fragment) OS=Homo sapiens GN=KDM1A PE=1 SV=1	3	21.3	0.721	0.74	0.764	0.748	0.699
Q9Y6Y0	Influenza virus NS1A-binding protein OS=Homo sapiens GN=IVNS1ABP PE=1 SV=3	2	71.7	1.042	1.14	1.092	1.122	1.271
Q9Y6X5	Bis(5'-adenosyl)-triphosphatase ENPP4 OS=Homo sapiens GN=ENPP4 PE=1 SV=3	8	51.6	0.563	0.87	0.717	0.987	0.859
Q9Y6X4	Soluble lamin-associated protein of 75 kDa OS=Homo sapiens GN=FAM169A PE=1 SV=2	12	74.9	0.902	0.803	0.877	0.747	0.668
Q9Y6W5	Wiskott-Aldrich syndrome protein family member 2 OS=Homo sapiens GN=WASF2 PE=1 SV=3	12	54.3	1.047	0.982	1.042	1.208	1.17
Q9Y6V0-5	Isoform 5 of Protein piccolo OS=Homo sapiens GN=PCLO	189	560.4	0.925	0.899	0.907	0.805	0.675
Q9Y6U3	Adseverin OS=Homo sapiens GN=SCIN PE=1 SV=4	10	80.4	1.337	1.056	1.281	1.522	1.462
Q9Y6T7	Diacylglycerol kinase beta OS=Homo sapiens GN=DGKB PE=2 SV=2	31	90.5	1.028	0.9	0.937	1.016	0.848
Q9Y6R7	IgGFc-binding protein OS=Homo sapiens GN=FCGBP PE=1 SV=3	12	571.6	1.11	1.097	1.505	1.458	2.142
Q9Y6R1	Electrogenic sodium bicarbonate cotransporter 1 OS=Homo sapiens GN=SLC4A4 PE=1 SV=1	84	121.4	0.946	1.033	0.986	0.929	0.97
Q9Y6R0	Numb-like protein OS=Homo sapiens GN=NUMBL PE=1 SV=1	28	64.9	0.966	0.866	0.878	0.686	0.671
Q9Y6N7-2	Isoform 2 of Roundabout homolog 1 OS=Homo sapiens GN=ROBO1	2	181.2
Q9Y6M9	NADH dehydrogenase [ubiquinone] 1 beta subcomplex subunit 9 OS=Homo sapiens GN=NDUFB9 PE=1 SV=3	29	21.8	0.981	1.144	1.187	1.015	1.189
Q9Y6M5	Zinc transporter 1 OS=Homo sapiens GN=SLC30A1 PE=1 SV=3	16	55.3	0.99	0.982	0.912	0.915	0.902
Q9Y6M4-2	Isoform 2 of Casein kinase I isoform gamma-3 OS=Homo sapiens GN=CSNK1G3	8	52.3	0.947	0.933	0.881	0.91	0.929
Q9Y6K9-2	Isoform 2 of NF-kappa-B essential modulator OS=Homo sapiens GN=IKBKG	6	55.8	1.418	1.131	1.066	1.014	1.046
Q9Y6K8	Adenylate kinase isoenzyme 5 OS=Homo sapiens GN=AK5 PE=1 SV=2	47	63.3	0.935	0.982	0.91	0.773	0.673
Q9Y6I3-1	Isoform 2 of Epsin-1 OS=Homo sapiens GN=EPN1	49	69	0.989	0.907	0.906	0.718	0.754
Q9Y6H1	Coiled-coil-helix-coiled-coil-helix domain-containing protein 2 OS=Homo sapiens GN=CHCHD2 PE=1 SV=1	7	15.5	0.888	0.906	0.886	1.144	0.902
Q9Y6G9	Cytoplasmic dynein 1 light intermediate chain 1 OS=Homo sapiens GN=DYNC1LI1 PE=1 SV=3	49	56.5	0.937	0.96	0.922	0.824	0.852
Q9Y6F6-7	Isoform 7 of Protein MRVI1 OS=Homo sapiens GN=MRVI1	20	98.8	1.053	0.986	1.277	1.428	1.173
Q9Y6D5	Brefeldin A-inhibited guanine nucleotide-exchange protein 2 OS=Homo sapiens GN=ARFGEF2 PE=1 SV=3	38	201.9	0.881	0.966	0.963	0.967	0.796
Q9Y6C9	Mitochondrial carrier homolog 2 OS=Homo sapiens GN=MTCH2 PE=1 SV=1	37	33.3	0.966	0.994	1.135	1.567	1.235
Q9Y6A4	Cilia- and flagella-associated protein 20 OS=Homo sapiens GN=CFAP20 PE=1 SV=1	2	22.8	0.987	1.115	0.976	1.072	0.985
Q9Y6A2	Cholesterol 24-hydroxylase OS=Homo sapiens GN=CYP46A1 PE=1 SV=1	12	56.8	0.884	0.888	0.708	0.64	0.528
Q9Y698	Voltage-dependent calcium channel gamma-2 subunit OS=Homo sapiens GN=CACNG2 PE=1 SV=1	16	35.9	0.978	1.103	1.028	1.167	1.187
Q9Y679	Ancient ubiquitous protein 1 OS=Homo sapiens GN=AUP1 PE=1 SV=1	6	53	0.845	0.875	0.861	0.774	0.701
Q9Y678	Coatomer subunit gamma-1 OS=Homo sapiens GN=COPG1 PE=1 SV=1	23	97.7	0.916	0.929	0.899	0.885	0.87
Q9Y657	Spindlin-1 OS=Homo sapiens GN=SPIN1 PE=1 SV=3	4	29.6	0.94	1.016	0.969	0.814	0.877
Q9Y639-5	Isoform 5 of Neuroplastin OS=Homo sapiens GN=NPTN	156	43.9	1.044	1.106	1.055	1.011	0.944
Q9Y625	Glypican-6 OS=Homo sapiens GN=GPC6 PE=1 SV=1	6	62.7	1.012	1.019	0.945	0.962	0.899
Q9Y618	Nuclear receptor corepressor 2 OS=Homo sapiens GN=NCOR2 PE=1 SV=2	2	274.6	100
Q9Y5W9	Sorting nexin-11 OS=Homo sapiens GN=SNX11 PE=1 SV=2	2	30.4	1.028	1.151	1.015	0.899	1.009
Q9Y5U9	Immediate early response 3-interacting protein 1 OS=Homo sapiens GN=IER3IP1 PE=1 SV=1	2	9
Q9Y5S1	Transient receptor potential cation channel subfamily V member 2 OS=Homo sapiens GN=TRPV2 PE=1 SV=1	8	85.9	0.973	1.131	0.948	0.902	1.064
Q9Y5P4-3	Isoform 3 of Collagen type IV alpha-3-binding protein OS=Homo sapiens GN=COL4A3BP	4	83.7	0.698	0.834	0.752	0.804	0.521
Q9Y5M8	Signal recognition particle receptor subunit beta OS=Homo sapiens GN=SRPRB PE=1 SV=3	14	29.7	0.928	0.916	0.866	0.893	0.794
Q9Y5L4	Mitochondrial import inner membrane translocase subunit Tim13 OS=Homo sapiens GN=TIMM13 PE=1 SV=1	25	10.5	0.916	1.069	0.895	0.881	0.881
Q9Y5L3	Ectonucleoside triphosphate diphosphohydrolase 2 OS=Homo sapiens GN=ENTPD2 PE=1 SV=1	6	53.6	1.167	1.194	1.207	1.234	1.256
Q9Y5K6	CD2-associated protein OS=Homo sapiens GN=CD2AP PE=1 SV=1	4	71.4	1.117	1.024	1.052	1.35	1.493
Q9Y5K3	Choline-phosphate cytidylyltransferase B OS=Homo sapiens GN=PCYT1B PE=1 SV=1	12	41.9	0.917	0.958	0.956	0.902	0.835
Q9Y5G2	Protocadherin gamma-B2 OS=Homo sapiens GN=PCDHGB2 PE=2 SV=1	5	100.8	1.107	1.164	1.056	1.007	0.954
Q9Y5F6	Protocadherin gamma-C5 OS=Homo sapiens GN=PCDHGC5 PE=2 SV=1	11	101.9	0.957	0.919	0.842	0.945	0.883
Q9Y5B9	FACT complex subunit SPT16 OS=Homo sapiens GN=SUPT16H PE=1 SV=1	2	119.8	1.201	1.24	1.117	0.938	1.23
Q9Y5A9	YTH domain-containing family protein 2 OS=Homo sapiens GN=YTHDF2 PE=1 SV=2	5	62.3	0.957	1.047	0.855	0.8	0.821
Q9Y584	Mitochondrial import inner membrane translocase subunit Tim22 OS=Homo sapiens GN=TIMM22 PE=1 SV=2	4	20	0.958	1.201	0.998	0.983	0.945
Q9Y570	Protein phosphatase methylesterase 1 OS=Homo sapiens GN=PPME1 PE=1 SV=3	27	42.3	0.885	0.795	0.886	0.764	0.758
Q9Y534	Cold shock domain-containing protein C2 OS=Homo sapiens GN=CSDC2 PE=1 SV=1	2	16.8
Q9Y520-7	Isoform 7 of Protein PRRC2C OS=Homo sapiens GN=PRRC2C	25	316.9	1.116	1.06	1.104	1.079	1.024
Q9Y512	Sorting and assembly machinery component 50 homolog OS=Homo sapiens GN=SAMM50 PE=1 SV=3	43	51.9	0.899	1.001	1.143	1.301	1.17
Q9Y4X5	E3 ubiquitin-protein ligase ARIH1 OS=Homo sapiens GN=ARIH1 PE=1 SV=2	6	64.1	0.95	0.926	0.93	0.835	0.903
Q9Y4P8-4	Isoform 4 of WD repeat domain phosphoinositide-interacting protein 2 OS=Homo sapiens GN=WIPI2	10	47.5
Q9Y4P1	Cysteine protease ATG4B OS=Homo sapiens GN=ATG4B PE=1 SV=2	10	44.3	0.884	0.889	0.999	0.917	0.914
Q9Y4L1	Hypoxia up-regulated protein 1 OS=Homo sapiens GN=HYOU1 PE=1 SV=1	130	111.3	0.942	0.974	0.955	0.857	0.844
Q9Y4J8-14	Isoform 14 of Dystrobrevin alpha OS=Homo sapiens GN=DTNA	44	78	1.163	0.971	1.211	1.142	1.093
Q9Y4J8-11	Isoform 11 of Dystrobrevin alpha OS=Homo sapiens GN=DTNA	42	50.4	1.152	1.269	1.045	0.967	0.89
Q9Y4G8	Rap guanine nucleotide exchange factor 2 OS=Homo sapiens GN=RAPGEF2 PE=1 SV=1	48	167.3	0.894	0.853	0.873	0.763	0.671
Q9Y4G6	Talin-2 OS=Homo sapiens GN=TLN2 PE=1 SV=4	235	271.4	0.809	0.834	0.833	0.772	0.672
Q9Y4F5	Centrosomal protein of 170 kDa protein B OS=Homo sapiens GN=CEP170B PE=1 SV=4	96	171.6	0.938	0.947	0.906	0.833	0.738
Q9Y4F1	FERM, RhoGEF and pleckstrin domain-containing protein 1 OS=Homo sapiens GN=FARP1 PE=1 SV=1	40	118.6	0.933	1.006	0.904	0.967	0.954
Q9Y4E8-3	Isoform 3 of Ubiquitin carboxyl-terminal hydrolase 15 OS=Homo sapiens GN=USP15	21	109.7	0.841	0.859	0.873	0.831	0.827
Q9Y4E8	Ubiquitin carboxyl-terminal hydrolase 15 OS=Homo sapiens GN=USP15 PE=1 SV=3	21	112.3	0.951	0.919	0.823	0.675	0.842
Q9Y4E6	WD repeat-containing protein 7 OS=Homo sapiens GN=WDR7 PE=1 SV=2	77	163.7	0.868	0.909	0.829	0.751	0.688
Q9Y4D7	Plexin-D1 OS=Homo sapiens GN=PLXND1 PE=1 SV=3	8	211.9	1.12	0.985	0.927	0.849	0.769
Q9Y4D2	Sn1-specific diacylglycerol lipase alpha OS=Homo sapiens GN=DAGLA PE=1 SV=3	11	114.9	1.093	1.102	0.992	0.933	1.071
Q9Y4D1	Disheveled-associated activator of morphogenesis 1 OS=Homo sapiens GN=DAAM1 PE=1 SV=2	39	123.4	1.013	1.019	1.004	1.04	0.902
Q9Y4C2	TRPM8 channel-associated factor 1 OS=Homo sapiens GN=TCAF1 PE=1 SV=3	4	102.1	0.914	0.874	0.905	0.854	0.707
Q9Y4B6	Protein VPRBP OS=Homo sapiens GN=VPRBP PE=1 SV=3	2	168.9	0.669	0.786	0.741	0.757	0.665
Q9Y490	Talin-1 OS=Homo sapiens GN=TLN1 PE=1 SV=3	221	269.6	1.028	1.009	1.129	1.145	1.134
Q9Y426	C2 domain-containing protein 2 OS=Homo sapiens GN=C2CD2 PE=1 SV=2	8	75.5	1.028	1.057	1.038	0.982	0.948
Q9Y3Z3	Deoxynucleoside triphosphate triphosphohydrolase SAMHD1 OS=Homo sapiens GN=SAMHD1 PE=1 SV=2	10	72.2	1.097	1.049	0.949	1.056	1.05
Q9Y3Y2-3	Isoform 2 of Chromatin target of PRMT1 protein OS=Homo sapiens GN=CHTOP	11	26.5	1.077	1.115	1.106	1.011	1.239
Q9Y3X0	Coiled-coil domain-containing protein 9 OS=Homo sapiens GN=CCDC9 PE=1 SV=1	6	59.7	1.068	1.064	1.092	0.984	1.118
Q9Y3U8	60S ribosomal protein L36 OS=Homo sapiens GN=RPL36 PE=1 SV=3	17	12.2	0.835	0.956	0.836	0.844	0.856
Q9Y3S1	Serine/threonine-protein kinase WNK2 OS=Homo sapiens GN=WNK2 PE=1 SV=4	48	242.5	0.982	0.971	0.978	0.873	0.9
Q9Y3R5	Protein dopey-2 OS=Homo sapiens GN=DOPEY2 PE=1 SV=5	2	258.1
Q9Y3Q8	TSC22 domain family protein 4 OS=Homo sapiens GN=TSC22D4 PE=1 SV=2	13	41	1.401	1.25	1.139	1.09	1.169
Q9Y3P9	Rab GTPase-activating protein 1 OS=Homo sapiens GN=RABGAP1 PE=1 SV=3	31	121.7	0.985	0.889	0.93	0.976	0.924
Q9Y3L5	Ras-related protein Rap-2c OS=Homo sapiens GN=RAP2C PE=1 SV=1	44	20.7	0.881	0.918	0.846	0.768	0.78
Q9Y3I0	tRNA-splicing ligase RtcB homolog OS=Homo sapiens GN=RTCB PE=1 SV=1	57	55.2	0.89	0.9	0.914	0.869	0.861
Q9Y3F4-2	Isoform 2 of Serine-threonine kinase receptor-associated protein OS=Homo sapiens GN=STRAP	44	39.8	0.924	0.906	0.918	0.874	0.866
Q9Y3E8	CGI-150 protein OS=Homo sapiens PE=2 SV=1	80	55	1.005	0.863	1.043	1.075	1.015
Q9Y3E7	Charged multivesicular body protein 3 OS=Homo sapiens GN=CHMP3 PE=1 SV=3	6	25.1	0.699	0.85	0.765	0.875	0.767
Q9Y3D8	Adenylate kinase isoenzyme 6 OS=Homo sapiens GN=AK6 PE=1 SV=1	2	20	1.113	1.214	1.175	0.995	1.125
Q9Y3D6	Mitochondrial fission 1 protein OS=Homo sapiens GN=FIS1 PE=1 SV=2	17	16.9	1	1.26	0.937	0.984	1.031
Q9Y3D3	28S ribosomal protein S16, mitochondrial OS=Homo sapiens GN=MRPS16 PE=1 SV=1	12	15.3	0.85	0.944	0.864	0.714	0.684
Q9Y3D2	Methionine-R-sulfoxide reductase B2, mitochondrial OS=Homo sapiens GN=MSRB2 PE=1 SV=2	6	19.5	0.976	0.931	1.007	0.98	0.928
Q9Y3D0	Mitotic spindle-associated MMXD complex subunit MIP18 OS=Homo sapiens GN=FAM96B PE=1 SV=1	10	17.7	1.029	0.989	1.002	1.021	0.915
Q9Y3C8	Ubiquitin-fold modifier-conjugating enzyme 1 OS=Homo sapiens GN=UFC1 PE=1 SV=3	4	19.4	0.895	0.978	1.2	1.166	1.094
Q9Y3C6	Peptidyl-prolyl cis-trans isomerase-like 1 OS=Homo sapiens GN=PPIL1 PE=1 SV=1	13	18.2	0.966	0.899	0.968	0.958	0.852
Q9Y3C5	RING finger protein 11 OS=Homo sapiens GN=RNF11 PE=1 SV=1	4	17.4	0.807	0.975	0.909	0.891	0.74
Q9Y3C0	WASH complex subunit CCDC53 OS=Homo sapiens GN=CCDC53 PE=1 SV=1	3	21.2	1.473	1.297	1.522	1.25	1.532
Q9Y3B4	Splicing factor 3B subunit 6 OS=Homo sapiens GN=SF3B6 PE=1 SV=1	6	14.6	0.946	1.036	0.911	1.018	1.038
Q9Y394	Dehydrogenase/reductase SDR family member 7 OS=Homo sapiens GN=DHRS7 PE=1 SV=1	35	38.3	1.004	1.14	1.13	1.297	1.309
Q9Y385	Ubiquitin-conjugating enzyme E2 J1 OS=Homo sapiens GN=UBE2J1 PE=1 SV=2	4	35.2	1.442	1.341	1.136	1.528	1.228
Q9Y376	Calcium-binding protein 39 OS=Homo sapiens GN=CAB39 PE=1 SV=1	37	39.8	0.776	0.834	0.847	0.974	1.043
Q9Y375	Complex I intermediate-associated protein 30, mitochondrial OS=Homo sapiens GN=NDUFAF1 PE=1 SV=2	8	37.7	0.894	1.013	0.92	0.846	0.749
Q9Y371-2	Isoform 2 of Endophilin-B1 OS=Homo sapiens GN=SH3GLB1	31	43.2	1.108	0.998	1.052	1.082	1.086
Q9Y333	U6 snRNA-associated Sm-like protein LSm2 OS=Homo sapiens GN=LSM2 PE=1 SV=1	4	10.8	1.228	1.156	1.125	1.037	1.175
Q9Y316-3	Isoform 3 of Protein MEMO1 OS=Homo sapiens GN=MEMO1	2	34.3	0.942	1.011	0.915	1.029	1.344
Q9Y305	Acyl-coenzyme A thioesterase 9, mitochondrial OS=Homo sapiens GN=ACOT9 PE=1 SV=2	46	49.9	1.006	1.062	0.997	0.875	0.885
Q9Y2Z9	Ubiquinone biosynthesis monooxygenase COQ6, mitochondrial OS=Homo sapiens GN=COQ6 PE=1 SV=2	10	50.8	1.44	1.041	0.932	0.857	0.89
Q9Y2Z4	Tyrosine--tRNA ligase, mitochondrial OS=Homo sapiens GN=YARS2 PE=1 SV=2	10	53.2	0.823	1	0.924	0.846	0.841
Q9Y2Z0	Protein SGT1 homolog OS=Homo sapiens GN=SUGT1 PE=1 SV=3	44	41	0.93	0.865	0.908	0.902	0.922
Q9Y2X3	Nucleolar protein 58 OS=Homo sapiens GN=NOP58 PE=1 SV=1	4	59.5	0.829	0.938	0.833	1.072	0.706
Q9Y2W2	WW domain-binding protein 11 OS=Homo sapiens GN=WBP11 PE=1 SV=1	2	70	0.874	1.033	0.885	0.924	0.751
Q9Y2W1	Thyroid hormone receptor-associated protein 3 OS=Homo sapiens GN=THRAP3 PE=1 SV=2	27	108.6	1.092	1.021	1.013	0.878	0.847
Q9Y2V2	Calcium-regulated heat-stable protein 1 OS=Homo sapiens GN=CARHSP1 PE=1 SV=2	6	15.9	1.177	1.086	1.216	1.276	1.418
Q9Y2S7	Polymerase delta-interacting protein 2 OS=Homo sapiens GN=POLDIP2 PE=1 SV=1	4	42	0.609	0.866	0.683	0.716	0.698
Q9Y2S6	Translation machinery-associated protein 7 OS=Homo sapiens GN=TMA7 PE=1 SV=1	4	7.1	0.795	0.922	0.878	1.035	1.001
Q9Y2S2	Lambda-crystallin homolog OS=Homo sapiens GN=CRYL1 PE=1 SV=3	26	35.4	0.872	0.947	1.015	1.438	1.272
Q9Y2R0	Cytochrome c oxidase assembly factor 3 homolog, mitochondrial OS=Homo sapiens GN=COA3 PE=1 SV=1	10	11.7	1.065	1.416	1.101	0.906	1.003
Q9Y2Q5	Ragulator complex protein LAMTOR2 OS=Homo sapiens GN=LAMTOR2 PE=1 SV=1	4	13.5	0.852	0.963	0.939	0.918	1.006
Q9Y2Q0	Phospholipid-transporting ATPase IA OS=Homo sapiens GN=ATP8A1 PE=1 SV=1	105	131.3	0.922	0.935	0.996	0.996	0.826
Q9Y2L9-3	Isoform 3 of Leucine-rich repeat and calponin homology domain-containing protein 1 OS=Homo sapiens GN=LRCH1	6	84.6	1.136	1.22	1.199	0.948	0.978
Q9Y2J8	Protein-arginine deiminase type-2 OS=Homo sapiens GN=PADI2 PE=1 SV=2	127	75.5	1.122	1.169	1.209	1.87	1.736
Q9Y2J2	Band 4.1-like protein 3 OS=Homo sapiens GN=EPB41L3 PE=1 SV=2	342	120.6	0.859	1.093	0.834	0.926	0.941
Q9Y2J0	Rabphilin-3A OS=Homo sapiens GN=RPH3A PE=1 SV=1	85	76.8	0.801	0.97	0.745	0.691	0.636
Q9Y2I8-2	Isoform 2 of WD repeat-containing protein 37 OS=Homo sapiens GN=WDR37	28	54.8	0.909	0.933	0.949	0.901	0.763
Q9Y2I7	1-phosphatidylinositol 3-phosphate 5-kinase OS=Homo sapiens GN=PIKFYVE PE=1 SV=3	2	237	1.456	1.539	1.32	1.256	0.85
Q9Y2I2	Netrin-G1 OS=Homo sapiens GN=NTNG1 PE=1 SV=3	2	60.5	1.07	1.353	1.098	0.863	1.161
Q9Y2H9	Microtubule-associated serine/threonine-protein kinase 1 OS=Homo sapiens GN=MAST1 PE=1 SV=2	14	170.6	1.066	1.051	1	0.984	0.981
Q9Y2H2	Phosphatidylinositide phosphatase SAC2 OS=Homo sapiens GN=INPP5F PE=1 SV=3	4	128.3	1.046	1.037	1.034	0.895	0.922
Q9Y2H1	Serine/threonine-protein kinase 38-like OS=Homo sapiens GN=STK38L PE=1 SV=3	14	54	0.948	0.888	0.927	0.906	0.79
Q9Y2H0-1	Isoform 2 of Disks large-associated protein 4 OS=Homo sapiens GN=DLGAP4	26	107.5	1.245	1.257	1.564	1.57	1.616
Q9Y2G0	Protein EFR3 homolog B OS=Homo sapiens GN=EFR3B PE=1 SV=2	26	92.4	0.898	0.914	0.877	0.905	0.79
Q9Y2E4	Disco-interacting protein 2 homolog C OS=Homo sapiens GN=DIP2C PE=1 SV=2	26	170.7	0.909	1.192	0.979	0.986	0.923
Q9Y2B9	cAMP-dependent protein kinase inhibitor gamma OS=Homo sapiens GN=PKIG PE=2 SV=1	2	7.9
Q9Y2B5-2	Isoform 2 of VPS9 domain-containing protein 1 OS=Homo sapiens GN=VPS9D1	6	72.9	1.198	1.153	1.216	1.075	1.306
Q9Y2B0	Protein canopy homolog 2 OS=Homo sapiens GN=CNPY2 PE=1 SV=1	19	20.6	1.232	1.153	1.208	0.975	1.134
Q9Y2A7-2	Isoform 2 of Nck-associated protein 1 OS=Homo sapiens GN=NCKAP1	116	129.4	0.903	0.891	0.912	0.937	0.819
Q9Y296	Trafficking protein particle complex subunit 4 OS=Homo sapiens GN=TRAPPC4 PE=1 SV=1	6	24.3	0.807	0.909	0.848	0.64	0.691
Q9Y295	Developmentally-regulated GTP-binding protein 1 OS=Homo sapiens GN=DRG1 PE=1 SV=1	6	40.5	0.962	0.883	0.838	1.055	1.085
Q9Y277-2	Isoform 2 of Voltage-dependent anion-selective channel protein 3 OS=Homo sapiens GN=VDAC3	98	30.8	0.818	0.98	0.875	0.886	0.834
Q9Y266	Nuclear migration protein nudC OS=Homo sapiens GN=NUDC PE=1 SV=1	58	38.2	1.043	1.002	1.033	0.938	1.004
Q9Y263	Phospholipase A-2-activating protein OS=Homo sapiens GN=PLAA PE=1 SV=2	30	87.1	0.863	0.92	0.835	0.807	0.754
Q9Y259	Choline/ethanolamine kinase OS=Homo sapiens GN=CHKB PE=1 SV=3	2	45.2	0.94	0.968	0.889	1.218	1.003
Q9Y243	RAC-gamma serine/threonine-protein kinase OS=Homo sapiens GN=AKT3 PE=1 SV=1	9	55.7	1.04	0.971	0.931	0.831	0.837
Q9Y237-2	Isoform 2 of Peptidyl-prolyl cis-trans isomerase NIMA-interacting 4 OS=Homo sapiens GN=PIN4	10	16.6	1.502	1.081	1.439	1.027	1.35
Q9Y230	RuvB-like 2 OS=Homo sapiens GN=RUVBL2 PE=1 SV=3	37	51.1	0.994	1.024	0.989	1.135	1.09
Q9Y219	Protein jagged-2 OS=Homo sapiens GN=JAG2 PE=1 SV=3	2	133.3	1.045	1.306	1.539	1.715	1.236
Q9Y217	Myotubularin-related protein 6 OS=Homo sapiens GN=MTMR6 PE=1 SV=3	4	71.9	0.829	0.773	0.783	0.793	0.705
Q9UQN3	Charged multivesicular body protein 2b OS=Homo sapiens GN=CHMP2B PE=1 SV=1	20	23.9	1.048	1.08	1.041	0.903	1.106
Q9UQD0-3	Isoform 3 of Sodium channel protein type 8 subunit alpha OS=Homo sapiens GN=SCN8A	22	226.3	0.968	1.084	1.004	0.943	1.023
Q9UQC2	GRB2-associated-binding protein 2 OS=Homo sapiens GN=GAB2 PE=1 SV=1	4	74.4	0.978	0.93	0.912	0.785	0.832
Q9UQB8	Brain-specific angiogenesis inhibitor 1-associated protein 2 OS=Homo sapiens GN=BAIAP2 PE=1 SV=1	104	60.8	0.932	0.816	0.817	0.7	0.594
Q9UQB3	Catenin delta-2 OS=Homo sapiens GN=CTNND2 PE=1 SV=3	95	132.6	1.02	0.975	1.093	1.145	1.122
Q9UQ90	Paraplegin OS=Homo sapiens GN=SPG7 PE=1 SV=2	16	88.2	0.931	1.047	0.903	0.977	1.039
Q9UQ49-2	Isoform 2 of Sialidase-3 OS=Homo sapiens GN=NEU3	4	51.6	0.811	0.769	0.959	1.169	0.794
Q9UQ26	Regulating synaptic membrane exocytosis protein 2 OS=Homo sapiens GN=RIMS2 PE=1 SV=2	16	160.3	0.983	1.101	0.936	0.934	0.876
Q9UQ16-3	Isoform 3 of Dynamin-3 OS=Homo sapiens GN=DNM3	154	97	0.91	0.935	0.92	0.874	0.825
Q9UQ13	Leucine-rich repeat protein SHOC-2 OS=Homo sapiens GN=SHOC2 PE=1 SV=2	10	64.8	0.995	0.976	0.962	0.944	0.903
Q9UQ03	Coronin-2B OS=Homo sapiens GN=CORO2B PE=1 SV=4	55	54.9	0.808	0.914	0.853	0.885	0.844
Q9UPY8-2	Isoform 2 of Microtubule-associated protein RP/EB family member 3 OS=Homo sapiens GN=MAPRE3	47	30.4	0.721	0.785	0.942	0.797	0.675
Q9UPY8	Microtubule-associated protein RP/EB family member 3 OS=Homo sapiens GN=MAPRE3 PE=1 SV=1	51	32	0.741	0.795	0.719	0.607	0.534
Q9UPY6-2	Isoform 2 of Wiskott-Aldrich syndrome protein family member 3 OS=Homo sapiens GN=WASF3	16	55	1.086	0.939	1.023	0.996	0.967
Q9UPX8-3	Isoform 3 of SH3 and multiple ankyrin repeat domains protein 2 OS=Homo sapiens GN=SHANK2	2	201.1	1.007	0.906	0.984	0.673	0.649
Q9UPX0-2	Isoform 2 of Protein turtle homolog B OS=Homo sapiens GN=IGSF9B	6	156.8	0.828	0.979	0.893	0.884	0.805
Q9UPV7	PHD finger protein 24 OS=Homo sapiens GN=PHF24 PE=1 SV=2	70	45.2	0.917	0.805	0.874	0.778	0.626
Q9UPU5	Ubiquitin carboxyl-terminal hydrolase 24 OS=Homo sapiens GN=USP24 PE=1 SV=3	6	294.2	0.78	0.813	0.815	0.856	0.783
Q9UPT8	Zinc finger CCCH domain-containing protein 4 OS=Homo sapiens GN=ZC3H4 PE=1 SV=3	4	140.2	0.817	0.765	0.784	0.749	0.763
Q9UPT5	Exocyst complex component 7 OS=Homo sapiens GN=EXOC7 PE=1 SV=3	28	83.3	0.858	0.911	0.858	0.779	0.75
Q9UPR5	Sodium/calcium exchanger 2 OS=Homo sapiens GN=SLC8A2 PE=2 SV=2	91	100.3	0.975	0.958	0.928	0.846	0.75
Q9UPR3	Protein SMG5 OS=Homo sapiens GN=SMG5 PE=1 SV=3	1	113.9	0.804	0.863	0.85	0.822	0.68
Q9UPR0	Inactive phospholipase C-like protein 2 OS=Homo sapiens GN=PLCL2 PE=1 SV=2	14	125.8	0.872	0.868	0.783	0.659	0.59
Q9UPQ9	Trinucleotide repeat-containing gene 6B protein OS=Homo sapiens GN=TNRC6B PE=1 SV=4	4	193.9	0.932	0.893	0.935	0.827	0.883
Q9UPQ0	LIM and calponin homology domains-containing protein 1 OS=Homo sapiens GN=LIMCH1 PE=1 SV=4	55	121.8	0.934	0.983	0.886	0.867	0.921
Q9UPP2	IQ motif and SEC7 domain-containing protein 3 OS=Homo sapiens GN=IQSEC3 PE=2 SV=3	10	127.5	0.913	0.892	0.899	0.759	0.733
Q9UPN7	Serine/threonine-protein phosphatase 6 regulatory subunit 1 OS=Homo sapiens GN=PPP6R1 PE=1 SV=5	2	96.7	1.149	1.069	1.085	1.16	1.221
Q9UPA5	Protein bassoon OS=Homo sapiens GN=BSN PE=1 SV=4	271	416.2	0.958	0.904	0.92	0.831	0.709
Q9UP83-2	Isoform 2 of Conserved oligomeric Golgi complex subunit 5 OS=Homo sapiens GN=COG5	2	94.8	1.053	0.944	0.915	0.855	0.948
Q9UNZ5	Leydig cell tumor 10 kDa protein homolog OS=Homo sapiens GN=C19orf53 PE=1 SV=1	2	10.6	1.797	1.624	1.277	1.367	1.396
Q9UNZ2-5	Isoform 3 of NSFL1 cofactor p47 OS=Homo sapiens GN=NSFL1C	53	40.8	0.976	0.902	0.969	0.862	0.823
Q9UNZ2-4	Isoform 2 of NSFL1 cofactor p47 OS=Homo sapiens GN=NSFL1C	44	37.3	2.647	1.548	2.343	1.167	1.859
Q9UNW9	RNA-binding protein Nova-2 OS=Homo sapiens GN=NOVA2 PE=1 SV=1	19	49	0.846	0.934	0.827	0.765	0.706
Q9UNS2	COP9 signalosome complex subunit 3 OS=Homo sapiens GN=COPS3 PE=1 SV=3	43	47.8	0.861	0.924	0.925	0.879	0.855
Q9UNL2-2	Isoform 2 of Translocon-associated protein subunit gamma OS=Homo sapiens GN=SSR3	2	22.6	1.193	1.512	0.945	1.115	0.961
Q9UNK0	Syntaxin-8 OS=Homo sapiens GN=STX8 PE=1 SV=2	14	26.9	1.085	1.133	1.128	1.169	1.062
Q9UNF0	Protein kinase C and casein kinase substrate in neurons protein 2 OS=Homo sapiens GN=PACSIN2 PE=1 SV=2	31	55.7	0.931	0.952	1.063	1.129	1.073
Q9UNE7	E3 ubiquitin-protein ligase CHIP OS=Homo sapiens GN=STUB1 PE=1 SV=2	36	34.8	1.093	1.008	1.144	1.001	0.984
Q9UNA1	Rho GTPase-activating protein 26 OS=Homo sapiens GN=ARHGAP26 PE=1 SV=1	18	92.2	0.766	0.85	0.9	0.88	0.743
Q9UN70	Protocadherin gamma-C3 OS=Homo sapiens GN=PCDHGC3 PE=1 SV=1	5	101
Q9UN37	Vacuolar protein sorting-associated protein 4A OS=Homo sapiens GN=VPS4A PE=1 SV=1	22	48.9	1.008	0.963	0.932	0.884	0.81
Q9UN36	Protein NDRG2 OS=Homo sapiens GN=NDRG2 PE=1 SV=2	102	40.8	0.854	0.995	0.923	1.061	1.034
Q9UMZ2-7	Isoform 6 of Synergin gamma OS=Homo sapiens GN=SYNRG	10	135.4	1.019	0.97	1.103	0.796	0.829
Q9UMZ1	Prothymosin a14 OS=Homo sapiens PE=2 SV=1	43	11.1	1.105	1.285	1.294	1.452	1.641
Q9UMX5	Neudesin OS=Homo sapiens GN=NENF PE=1 SV=1	22	18.8	1.198	1.172	1.157	1.288	1.284
Q9UMS4	Pre-mRNA-processing factor 19 OS=Homo sapiens GN=PRPF19 PE=1 SV=1	18	55.1	1.063	0.956	0.931	0.914	0.967
Q9UMS0	NFU1 iron-sulfur cluster scaffold homolog, mitochondrial OS=Homo sapiens GN=NFU1 PE=1 SV=2	9	28.4	0.735	0.866	0.842	0.745	0.797
Q9UM85	Beta-globin protein (Fragment) OS=Homo sapiens GN=beta-globin PE=4 SV=1	27	2.1	1.109	0.901	0.977	1.115	1.488
Q9UM19	Hippocalcin-like protein 4 OS=Homo sapiens GN=HPCAL4 PE=1 SV=3	140	22.2	0.901	0.902	1.003	1.157	0.935
Q9UM13	Anaphase-promoting complex subunit 10 OS=Homo sapiens GN=ANAPC10 PE=1 SV=1	2	21.2
Q9ULX7	Carbonic anhydrase 14 OS=Homo sapiens GN=CA14 PE=1 SV=1	7	37.6	1.216	1.348	0.907	1.23	1.51
Q9ULX6	A-kinase anchor protein 8-like OS=Homo sapiens GN=AKAP8L PE=1 SV=3	4	71.6	0.735	0.803	0.665	0.595	0.491
Q9ULV4-3	Isoform 3 of Coronin-1C OS=Homo sapiens GN=CORO1C	49	58.9	0.87	0.86	0.919	0.96	0.917
Q9ULU8-4	Isoform 4 of Calcium-dependent secretion activator 1 OS=Homo sapiens GN=CADPS	124	153.4	0.762	0.794	0.828	0.812	0.688
Q9ULU4-19	Isoform 19 of Protein kinase C-binding protein 1 OS=Homo sapiens GN=ZMYND8	2	137.9	1.003	1.148	1.006	0.775	0.698
Q9ULS5	Transmembrane and coiled-coil domains protein 3 OS=Homo sapiens GN=TMCC3 PE=2 SV=3	4	53.8	2.142	1.848	2.079	1.355	2.526
Q9ULR3	Protein phosphatase 1H OS=Homo sapiens GN=PPM1H PE=1 SV=2	48	56.4	1.164	1.135	1.105	1.006	1.107
Q9ULP9	TBC1 domain family member 24 OS=Homo sapiens GN=TBC1D24 PE=1 SV=2	27	62.9	0.945	0.993	0.975	0.866	0.818
Q9ULP0-6	Isoform 6 of Protein NDRG4 OS=Homo sapiens GN=NDRG4	34	42.9	0.996	1.132	1.107	1.041	0.964
Q9ULN7-5	Isoform 2 of PNMA-like protein 2 OS=Homo sapiens GN=PNMAL2	14	68.6	0.891	0.854	0.92	0.81	0.828
Q9ULL8	Protein Shroom4 OS=Homo sapiens GN=SHROOM4 PE=1 SV=3	2	164.8	1.398	1.192	1.022	1.084	1.672
Q9ULL4-2	Isoform 2 of Plexin-B3 OS=Homo sapiens GN=PLXNB3	2	209.2	1.216	1.036	1.277	1.068	0.926
Q9ULL1	Pleckstrin homology domain-containing family G member 1 OS=Homo sapiens GN=PLEKHG1 PE=1 SV=2	6	155.3	1.055	1.149	1.149	1.004	0.859
Q9ULJ8-3	Isoform 3 of Neurabin-1 OS=Homo sapiens GN=PPP1R9A	24	154	0.824	0.946	0.88	0.819	0.818
Q9ULH7	MKL/myocardin-like protein 2 OS=Homo sapiens GN=MKL2 PE=1 SV=3	26	118.1	1.081	0.92	1	0.922	0.837
Q9ULH1-2	Isoform 1 of Arf-GAP with SH3 domain, ANK repeat and PH domain-containing protein 1 OS=Homo sapiens GN=ASAP1	24	125.8	1.141	0.953	1.029	0.845	0.871
Q9ULH0	Kinase D-interacting substrate of 220 kDa OS=Homo sapiens GN=KIDINS220 PE=1 SV=3	12	196.4	0.817	0.89	0.833	0.806	0.755
Q9ULF5	Zinc transporter ZIP10 OS=Homo sapiens GN=SLC39A10 PE=1 SV=2	7	94.1	0.989	1.041	0.978	0.793	0.776
Q9ULE6	Paladin OS=Homo sapiens GN=PALD1 PE=1 SV=3	2	96.7	0.824	1.048	0.946	1.096	0.938
Q9ULD0	2-oxoglutarate dehydrogenase-like, mitochondrial OS=Homo sapiens GN=OGDHL PE=1 SV=3	123	114.4	0.841	0.959	0.853	0.761	0.752
Q9ULC8-3	Isoform 3 of Probable palmitoyltransferase ZDHHC8 OS=Homo sapiens GN=ZDHHC8	4	83.1	0.868	1.113	0.827	0.928	0.668
Q9ULC4-3	Isoform 3 of Malignant T-cell-amplified sequence 1 OS=Homo sapiens GN=MCTS1	8	20.5	0.895	0.899	0.953	1.093	1.002
Q9ULB4	Cadherin-9 OS=Homo sapiens GN=CDH9 PE=2 SV=2	8	88.6	1.014	1.054	0.959	0.977	0.846
Q9ULB1-3	Isoform 3a of Neurexin-1 OS=Homo sapiens GN=NRXN1	96	169.8	0.965	1.031	0.975	0.947	0.808
Q9UL78	Myosin-reactive immunoglobulin light chain variable region (Fragment) OS=Homo sapiens PE=2 SV=1	8	11.6	1.462	1.088	1.106	0.781	0.975
Q9UL51	Potassium/sodium hyperpolarization-activated cyclic nucleotide-gated channel 2 OS=Homo sapiens GN=HCN2 PE=1 SV=3	35	96.9	0.99	1.182	1.054	0.946	1.141
Q9UL26	Ras-related protein Rab-22A OS=Homo sapiens GN=RAB22A PE=1 SV=2	16	21.8	1.266	1.09	1.136	1.02	1.32
Q9UL15-2	Isoform 2 of BAG family molecular chaperone regulator 5 OS=Homo sapiens GN=BAG5	25	56	1.175	1.102	1.162	1.011	1.101
Q9UKZ4-2	Isoform 2 of Teneurin-1 OS=Homo sapiens GN=TENM1	4	305.8
Q9UKZ1	CCR4-NOT transcription complex subunit 11 OS=Homo sapiens GN=CNOT11 PE=1 SV=1	4	55.2	0.973	1.054	0.957	0.893	0.893
Q9UKV8	Protein argonaute-2 OS=Homo sapiens GN=AGO2 PE=1 SV=3	12	97.1	0.927	1.037	0.918	0.971	0.796
Q9UKV3	Apoptotic chromatin condensation inducer in the nucleus OS=Homo sapiens GN=ACIN1 PE=1 SV=2	36	151.8	1.014	1.081	1.094	1.027	1.103
Q9UKU7	Isobutyryl-CoA dehydrogenase, mitochondrial OS=Homo sapiens GN=ACAD8 PE=1 SV=1	22	45	0.996	1.049	1.04	1.025	0.986
Q9UKU6	Thyrotropin-releasing hormone-degrading ectoenzyme OS=Homo sapiens GN=TRHDE PE=2 SV=1	4	116.9
Q9UKU0-1	Isoform 1 of Long-chain-fatty-acid--CoA ligase 6 OS=Homo sapiens GN=ACSL6	53	80.6	0.97	1.04	0.984	0.861	0.935
Q9UKK3	Poly [ADP-ribose] polymerase 4 OS=Homo sapiens GN=PARP4 PE=1 SV=3	10	192.5	1.41	1.285	1.063	1.073	1.467
Q9UKJ3	G patch domain-containing protein 8 OS=Homo sapiens GN=GPATCH8 PE=1 SV=2	4	164.1	1.088	0.967	0.94	1.09	0.89
Q9UKI8-2	Isoform 2 of Serine/threonine-protein kinase tousled-like 1 OS=Homo sapiens GN=TLK1	2	89	0.804	0.737	0.787	0.465	0.392
Q9UKG1	DCC-interacting protein 13-alpha OS=Homo sapiens GN=APPL1 PE=1 SV=1	32	79.6	1.064	1.053	1.048	0.956	1.01
Q9UKF7	Cytoplasmic phosphatidylinositol transfer protein 1 OS=Homo sapiens GN=PITPNC1 PE=1 SV=3	8	38.4	1.048	0.942	1.023	1.054	1.061
Q9UKE5	TRAF2 and NCK-interacting protein kinase OS=Homo sapiens GN=TNIK PE=1 SV=1	37	154.8	1.082	1.007	0.928	0.841	0.891
Q9UKA9-2	Isoform 2 of Polypyrimidine tract-binding protein 2 OS=Homo sapiens GN=PTBP2	13	57.6	0.936	0.943	0.914	0.797	0.755
Q9UK99	F-box only protein 3 OS=Homo sapiens GN=FBXO3 PE=1 SV=3	12	54.5	0.929	0.797	0.997	0.973	0.959
Q9UK76-2	Isoform 2 of Hematological and neurological expressed 1 protein OS=Homo sapiens GN=HN1	16	19.9	0.903	0.906	0.943	1.011	0.958
Q9UK73	Protein fem-1 homolog B OS=Homo sapiens GN=FEM1B PE=1 SV=1	2	70.2	0.912	1.063	0.904	1.02	0.922
Q9UK61	Protein TASOR OS=Homo sapiens GN=FAM208A PE=1 SV=3	2	188.9	0.753	0.878	0.803	0.667	0.635
Q9UK54	Hemoglobin beta subunit variant (Fragment) OS=Homo sapiens GN=HBB PE=2 SV=1	628	14	0.898	0.735	1.067	0.778	1.389
Q9UK45	U6 snRNA-associated Sm-like protein LSm7 OS=Homo sapiens GN=LSM7 PE=1 SV=1	6	11.6	0.926	0.904	0.9	1.059	1.028
Q9UK41-2	Isoform 2 of Vacuolar protein sorting-associated protein 28 homolog OS=Homo sapiens GN=VPS28	8	26.4	0.954	0.938	0.975	1.156	1.052
Q9UK22	F-box only protein 2 OS=Homo sapiens GN=FBXO2 PE=1 SV=2	41	33.3	0.791	0.879	1.117	1.345	1.037
Q9UK17	Potassium voltage-gated channel subfamily D member 3 OS=Homo sapiens GN=KCND3 PE=1 SV=3	16	73.4	0.883	1.044	0.933	0.931	0.853
Q9UK08	Guanine nucleotide-binding protein G(I)/G(S)/G(O) subunit gamma-8 OS=Homo sapiens GN=GNG8 PE=1 SV=1	2	7.8	1.564	1.252	1.027	1.17	1.674
Q9UJZ1	Stomatin-like protein 2, mitochondrial OS=Homo sapiens GN=STOML2 PE=1 SV=1	50	38.5	0.904	1.088	0.899	0.849	0.847
Q9UJY5-6	Isoform 6 of ADP-ribosylation factor-binding protein GGA1 OS=Homo sapiens GN=GGA1	8	72.2	1.141	1.002	0.885	0.67	0.79
Q9UJY1	Heat shock protein beta-8 OS=Homo sapiens GN=HSPB8 PE=1 SV=1	6	21.6	1.233	1.214	1.55	2.504	1.78
Q9UJW0-3	Isoform 3 of Dynactin subunit 4 OS=Homo sapiens GN=DCTN4	20	53.1	0.874	0.931	0.962	0.873	0.962
Q9UJV8	Purine-rich element-binding protein gamma OS=Homo sapiens GN=PURG PE=2 SV=1	2	39.5	0.979	0.967	0.857	0.81	0.819
Q9UJV3	Probable E3 ubiquitin-protein ligase MID2 OS=Homo sapiens GN=MID2 PE=1 SV=3	2	83.2	0.818	1.294	1.206	0.904	0.959
Q9UJU6-3	Isoform 3 of Drebrin-like protein OS=Homo sapiens GN=DBNL	46	49	0.869	0.882	0.884	0.81	0.739
Q9UJS0-2	Isoform 2 of Calcium-binding mitochondrial carrier protein Aralar2 OS=Homo sapiens GN=SLC25A13	30	74.3	1.183	1.277	1.137	1.148	1.249
Q9UJQ1	Lysosome-associated membrane glycoprotein 5 OS=Homo sapiens GN=LAMP5 PE=1 SV=1	4	31.5	0.922	1.062	0.877	0.891	0.724
Q9UJF2-2	Isoform 2 of Ras GTPase-activating protein nGAP OS=Homo sapiens GN=RASAL2	6	143.8	0.789	0.921	0.921	0.629	0.594
Q9UJD0	Regulating synaptic membrane exocytosis protein 3 OS=Homo sapiens GN=RIMS3 PE=1 SV=1	14	32.8	1.035	1.044	0.993	1.036	0.968
Q9UJC5	SH3 domain-binding glutamic acid-rich-like protein 2 OS=Homo sapiens GN=SH3BGRL2 PE=1 SV=2	10	12.3	0.736	0.928	1.045	1.465	1.2
Q9UJC3	Protein Hook homolog 1 OS=Homo sapiens GN=HOOK1 PE=1 SV=2	3	84.6	0.823	0.686	0.726	0.463	0.446
Q9UJ83	2-hydroxyacyl-CoA lyase 1 OS=Homo sapiens GN=HACL1 PE=1 SV=2	2	63.7	1.45	1.433	1.197	1.182	1.337
Q9UJ70-2	Isoform 2 of N-acetyl-D-glucosamine kinase OS=Homo sapiens GN=NAGK	33	42	1.041	0.945	1.04	1.019	0.958
Q9UJ68	Mitochondrial peptide methionine sulfoxide reductase OS=Homo sapiens GN=MSRA PE=1 SV=1	10	26.1	1.023	0.911	1.073	1.029	1.008
Q9UJ41	Rab5 GDP/GTP exchange factor OS=Homo sapiens GN=RABGEF1 PE=1 SV=2	13	79.3	0.94	0.949	1.016	0.91	0.898
Q9UJ04	Testis-specific Y-encoded-like protein 4 OS=Homo sapiens GN=TSPYL4 PE=1 SV=2	8	45.1	0.933	0.999	1.065	0.98	1.026
Q9UIW2	Plexin-A1 OS=Homo sapiens GN=PLXNA1 PE=1 SV=3	86	210.9	0.95	0.929	0.926	0.798	0.747
Q9UIU0	Dihydropyridine receptor alpha 2 subunit OS=Homo sapiens GN=CACNA2D1 PE=4 SV=1	139	125.2	1.031	1.051	0.96	0.954	0.951
Q9UIL1	Short coiled-coil protein OS=Homo sapiens GN=SCOC PE=1 SV=2	2	18	1.147	1.12	1.084	1.076	1.393
Q9UII2	ATPase inhibitor, mitochondrial OS=Homo sapiens GN=ATPIF1 PE=1 SV=1	27	12.2	1.089	1.213	1.051	0.915	0.899
Q9UIG0	Tyrosine-protein kinase BAZ1B OS=Homo sapiens GN=BAZ1B PE=1 SV=2	5	170.8	0.974	1.044	0.966	0.916	0.872
Q9UID3	Vacuolar protein sorting-associated protein 51 homolog OS=Homo sapiens GN=VPS51 PE=1 SV=2	20	86	0.798	0.883	0.818	0.77	0.709
Q9UIC8-2	Isoform 2 of Leucine carboxyl methyltransferase 1 OS=Homo sapiens GN=LCMT1	12	41.1	0.9	0.864	0.931	0.889	0.899
Q9UI40	Sodium/potassium/calcium exchanger 2 OS=Homo sapiens GN=SLC24A2 PE=1 SV=1	67	73.6	1.184	1.4	1.186	1.05	1.369
Q9UI32	Glutaminase liver isoform, mitochondrial OS=Homo sapiens GN=GLS2 PE=1 SV=2	12	66.3	0.899	0.938	0.921	0.821	0.708
Q9UI30	Multifunctional methyltransferase subunit TRM112-like protein OS=Homo sapiens GN=TRMT112 PE=1 SV=1	3	14.2	0.926	1.013	0.944	1.22	1.153
Q9UI26-2	Isoform 2 of Importin-11 OS=Homo sapiens GN=IPO11	4	116.9
Q9UI15	Transgelin-3 OS=Homo sapiens GN=TAGLN3 PE=1 SV=2	191	22.5	1.006	0.997	0.972	0.816	0.909
Q9UI14	Prenylated Rab acceptor protein 1 OS=Homo sapiens GN=RABAC1 PE=1 SV=1	2	20.6	1.068	1.095	0.884	0.745	0.975
Q9UI12	V-type proton ATPase subunit H OS=Homo sapiens GN=ATP6V1H PE=1 SV=1	112	55.8	0.969	1.003	0.985	0.916	0.888
Q9UI09	NADH dehydrogenase [ubiquinone] 1 alpha subcomplex subunit 12 OS=Homo sapiens GN=NDUFA12 PE=1 SV=1	67	17.1	0.869	1.029	0.882	0.809	0.889
Q9UI08-2	Isoform 1 of Ena/VASP-like protein OS=Homo sapiens GN=EVL	38	44.8	0.987	1.033	0.967	0.875	0.841
Q9UHY7	Enolase-phosphatase E1 OS=Homo sapiens GN=ENOPH1 PE=1 SV=1	27	28.9	1.091	1.073	1.059	0.983	1.119
Q9UHY1	Nuclear receptor-binding protein OS=Homo sapiens GN=NRBP1 PE=1 SV=1	16	59.8	0.896	0.933	0.882	0.706	0.621
Q9UHX1	Poly(U)-binding-splicing factor PUF60 OS=Homo sapiens GN=PUF60 PE=1 SV=1	12	59.8	0.93	0.924	0.939	0.852	0.875
Q9UHW9-3	Isoform 3 of Solute carrier family 12 member 6 OS=Homo sapiens GN=SLC12A6	11	125.9	1.035	0.984	1.021	0.9	0.901
Q9UHV9	Prefoldin subunit 2 OS=Homo sapiens GN=PFDN2 PE=1 SV=1	22	16.6	1.06	0.965	1.021	1.073	1.032
Q9UHQ9	NADH-cytochrome b5 reductase 1 OS=Homo sapiens GN=CYB5R1 PE=1 SV=1	22	34.1	0.918	1.122	0.95	1.003	0.987
Q9UHQ4-2	Isoform 2 of B-cell receptor-associated protein 29 OS=Homo sapiens GN=BCAP29	47	40.8	1.021	1.132	0.971	0.914	0.907
Q9UHP3-3	Isoform USP25m of Ubiquitin carboxyl-terminal hydrolase 25 OS=Homo sapiens GN=USP25	5	129.9	1.02	0.973	1.008	1.024	0.97
Q9UHN6	Transmembrane protein 2 OS=Homo sapiens GN=TMEM2 PE=1 SV=1	2	154.3	1.17	1.135	1.286	0.937	0.977
Q9UHL4	Dipeptidyl peptidase 2 OS=Homo sapiens GN=DPP7 PE=1 SV=3	9	54.3	0.964	1.302	0.951	0.952	0.82
Q9UHG3	Prenylcysteine oxidase 1 OS=Homo sapiens GN=PCYOX1 PE=1 SV=3	24	56.6	0.949	1.099	0.944	1.075	1.114
Q9UHG2	ProSAAS OS=Homo sapiens GN=PCSK1N PE=1 SV=1	89	27.4	0.827	0.882	0.855	0.86	0.845
Q9UHF0-2	Isoform 2 of Tachykinin-3 OS=Homo sapiens GN=TAC3	6	14.8	1.084	0.998	1.098	1.082	0.891
Q9UHD9	Ubiquilin-2 OS=Homo sapiens GN=UBQLN2 PE=1 SV=2	60	65.7	1.079	1.071	1.013	0.99	1.046
Q9UHD2	Serine/threonine-protein kinase TBK1 OS=Homo sapiens GN=TBK1 PE=1 SV=1	10	83.6	0.89	0.963	0.847	0.839	0.797
Q9UHC7	E3 ubiquitin-protein ligase makorin-1 OS=Homo sapiens GN=MKRN1 PE=1 SV=3	2	53.3	0.702	0.835	0.792	0.759	0.609
Q9UHB9	Signal recognition particle subunit SRP68 OS=Homo sapiens GN=SRP68 PE=1 SV=2	30	70.7	0.925	0.979	0.986	0.904	0.932
Q9UHA4	Ragulator complex protein LAMTOR3 OS=Homo sapiens GN=LAMTOR3 PE=1 SV=1	6	13.6	0.868	0.956	1.006	1.105	1.043
Q9UH92	Max-like protein X OS=Homo sapiens GN=MLX PE=1 SV=2	2	33.3	0.928	0.852	0.817	0.766	0.888
Q9UH65	Switch-associated protein 70 OS=Homo sapiens GN=SWAP70 PE=1 SV=1	17	69	0.794	0.804	0.855	0.724	0.771
Q9UH62	Armadillo repeat-containing X-linked protein 3 OS=Homo sapiens GN=ARMCX3 PE=1 SV=1	15	42.5	0.777	0.883	0.874	0.97	0.837
Q9UH03-2	Isoform 2 of Neuronal-specific septin-3 OS=Homo sapiens GN=SEPT3	118	40.1	0.886	0.943	0.94	0.929	0.771
Q9UGU0	Transcription factor 20 OS=Homo sapiens GN=TCF20 PE=1 SV=3	2	211.6
Q9UGM6	Tryptophan--tRNA ligase, mitochondrial OS=Homo sapiens GN=WARS2 PE=1 SV=1	4	40.1	0.727	0.909	0.794	0.66	0.621
Q9UGJ0	5'-AMP-activated protein kinase subunit gamma-2 OS=Homo sapiens GN=PRKAG2 PE=1 SV=1	14	63	1.217	1.085	1.112	0.952	1.005
Q9UGC6	Regulator of G-protein signaling 17 OS=Homo sapiens GN=RGS17 PE=1 SV=2	12	24.3	1.103	1.126	1.484	1.398	1.384
Q9UG63-2	Isoform 2 of ATP-binding cassette sub-family F member 2 OS=Homo sapiens GN=ABCF2	3	72.4	0.89	0.971	0.957	1.267	1.023
Q9UG56	Phosphatidylserine decarboxylase proenzyme, mitochondrial OS=Homo sapiens GN=PISD PE=2 SV=4	3	46.6	0.976	1.249	1.157	0.643	0.843
Q9UFN0	Protein NipSnap homolog 3A OS=Homo sapiens GN=NIPSNAP3A PE=1 SV=2	29	28.4	1.013	1.047	0.953	1.218	1.002
Q9UFG5-2	Isoform 2 of UPF0449 protein C19orf25 OS=Homo sapiens GN=C19orf25	4	17.2	0.971	1.12	1.098	0.916	0.961
Q9UF56	F-box/LRR-repeat protein 17 OS=Homo sapiens GN=FBXL17 PE=2 SV=3	2	75.6	1.425	1.373	2.063	2.569	2.136
Q9UEY8-2	Isoform 1 of Gamma-adducin OS=Homo sapiens GN=ADD3	123	75.6	1.105	0.991	1.081	1.238	1.258
Q9UEW8	STE20/SPS1-related proline-alanine-rich protein kinase OS=Homo sapiens GN=STK39 PE=1 SV=3	24	59.4	0.919	0.942	0.874	0.858	0.858
Q9UDY4	DnaJ homolog subfamily B member 4 OS=Homo sapiens GN=DNAJB4 PE=1 SV=1	26	37.8	1.078	1.119	0.912	0.855	0.795
Q9UDW1	Cytochrome b-c1 complex subunit 9 OS=Homo sapiens GN=UQCR10 PE=1 SV=3	5	7.3	0.926	1.356	0.894	0.808	0.898
Q9UD71	Protein phosphatase 1 regulatory subunit 1B OS=Homo sapiens GN=PPP1R1B PE=1 SV=2	39	22.9	0.87	0.727	0.889	0.788	0.838
Q9UBY8	Protein CLN8 OS=Homo sapiens GN=CLN8 PE=1 SV=3	5	32.8	1.009	0.916	0.877	0.989	1.11
Q9UBX1	Cathepsin F OS=Homo sapiens GN=CTSF PE=1 SV=1	2	53.3	0.723	0.761	0.777	0.757	0.7
Q9UBW8	COP9 signalosome complex subunit 7a OS=Homo sapiens GN=COPS7A PE=1 SV=1	14	30.3	0.904	0.982	0.917	0.956	0.932
Q9UBV8	Peflin OS=Homo sapiens GN=PEF1 PE=1 SV=1	12	30.4	1.005	1.116	1.014	1.065	1.003
Q9UBV2	Protein sel-1 homolog 1 OS=Homo sapiens GN=SEL1L PE=1 SV=3	8	88.7	0.904	1.034	0.927	0.878	0.841
Q9UBS9-2	Isoform 2 of SUN domain-containing ossification factor OS=Homo sapiens GN=SUCO	2	156.3	0.925	0.834	0.9	0.705	0.639
Q9UBS4	DnaJ homolog subfamily B member 11 OS=Homo sapiens GN=DNAJB11 PE=1 SV=1	18	40.5	0.914	0.957	0.878	0.892	0.887
Q9UBQ7	Glyoxylate reductase/hydroxypyruvate reductase OS=Homo sapiens GN=GRHPR PE=1 SV=1	43	35.6	1.068	0.999	1.105	1.181	1.268
Q9UBQ5	Eukaryotic translation initiation factor 3 subunit K OS=Homo sapiens GN=EIF3K PE=1 SV=1	10	25	0.842	0.914	0.863	0.852	0.854
Q9UBL6	Copine-7 OS=Homo sapiens GN=CPNE7 PE=1 SV=1	20	70.2	0.872	0.867	0.854	0.743	0.65
Q9UBL0-3	Isoform 3 of cAMP-regulated phosphoprotein 21 OS=Homo sapiens GN=ARPP21	4	88.5	1.139	0.946	0.938	0.991	0.803
Q9UBJ2	ATP-binding cassette sub-family D member 2 OS=Homo sapiens GN=ABCD2 PE=1 SV=1	2	83.2
Q9UBI9	Headcase protein homolog OS=Homo sapiens GN=HECA PE=1 SV=1	2	58.8
Q9UBI6	Guanine nucleotide-binding protein G(I)/G(S)/G(O) subunit gamma-12 OS=Homo sapiens GN=GNG12 PE=1 SV=3	49	8	1.085	1.12	1.162	1.561	1.515
Q9UBG0	C-type mannose receptor 2 OS=Homo sapiens GN=MRC2 PE=1 SV=2	6	166.6	1.351	1.125	1.121	0.947	1.172
Q9UBF2	Coatomer subunit gamma-2 OS=Homo sapiens GN=COPG2 PE=1 SV=1	4	97.6	0.808	0.907	0.833	0.875	0.641
Q9UBC2-2	Isoform 2 of Epidermal growth factor receptor substrate 15-like 1 OS=Homo sapiens GN=EPS15L1	66	99.5	0.86	0.94	0.888	0.846	0.788
Q9UBB6-3	Isoform 3 of Neurochondrin OS=Homo sapiens GN=NCDN	97	79.1	0.977	0.919	1.036	1.009	0.952
Q9UBB4	Ataxin-10 OS=Homo sapiens GN=ATXN10 PE=1 SV=1	28	53.5	1.018	0.93	1.022	1.07	1.045
Q9P2Z7	Major myelin proteolipid (Fragment) OS=Homo sapiens GN=PLP PE=4 SV=1	35	8.9	0.634	0.533	0.936	1.043	0.891
Q9P2W9	Syntaxin-18 OS=Homo sapiens GN=STX18 PE=1 SV=1	6	38.7	0.755	0.869	0.741	0.693	0.648
Q9P2W3	Guanine nucleotide-binding protein G(I)/G(S)/G(O) subunit gamma-13 OS=Homo sapiens GN=GNG13 PE=3 SV=1	14	7.9	0.877	1.091	0.881	0.777	0.786
Q9P2U8	Vesicular glutamate transporter 2 OS=Homo sapiens GN=SLC17A6 PE=2 SV=1	18	64.4	0.891	1.046	0.886	0.79	0.785
Q9P2U7	Vesicular glutamate transporter 1 OS=Homo sapiens GN=SLC17A7 PE=2 SV=1	54	61.6	0.974	1.083	0.975	0.894	0.75
Q9P2S2	Neurexin-2 OS=Homo sapiens GN=NRXN2 PE=2 SV=1	38	184.9	0.993	1.046	0.939	0.853	0.73
Q9P2R3-4	Isoform 4 of Rabankyrin-5 OS=Homo sapiens GN=ANKFY1	37	132.7	1.033	1.001	1.036	1.079	1.066
Q9P2Q2	FERM domain-containing protein 4A OS=Homo sapiens GN=FRMD4A PE=1 SV=3	6	115.4	1.125	1.124	1.009	0.956	0.864
Q9P2P5	E3 ubiquitin-protein ligase HECW2 OS=Homo sapiens GN=HECW2 PE=1 SV=2	12	175.7	0.943	0.92	0.913	0.751	0.644
Q9P2K3-3	Isoform 3 of REST corepressor 3 OS=Homo sapiens GN=RCOR3	2	61.2	1.037	1.113	1.064	0.895	0.921
Q9P2H5	Ubiquitin carboxyl-terminal hydrolase 35 OS=Homo sapiens GN=USP35 PE=1 SV=3	6	113.3	0.812	0.796	0.827	0.652	0.532
Q9P2G1	Ankyrin repeat and IBR domain-containing protein 1 OS=Homo sapiens GN=ANKIB1 PE=1 SV=3	10	121.9	1.027	0.98	0.925	0.898	0.904
Q9P2E5	Chondroitin sulfate glucuronyltransferase OS=Homo sapiens GN=CHPF2 PE=2 SV=2	4	85.9	0.846	0.929	0.863	0.892	0.911
Q9P2D8-3	Isoform 3 of Protein unc-79 homolog OS=Homo sapiens GN=UNC79	2	297.4	0.727	0.669	0.795	1.234	1.156
Q9P2C4	Transmembrane protein 181 OS=Homo sapiens GN=TMEM181 PE=1 SV=2	4	69.3	1.249	1.607	1.323	1.87	1.278
Q9P2B2	Prostaglandin F2 receptor negative regulator OS=Homo sapiens GN=PTGFRN PE=1 SV=2	24	98.5	0.941	1.166	0.962	1.048	0.981
Q9P2A4	ABI gene family member 3 OS=Homo sapiens GN=ABI3 PE=1 SV=2	2	39	0.848	0.881	0.906	0.888	0.772
Q9P273	Teneurin-3 OS=Homo sapiens GN=TENM3 PE=2 SV=3	8	300.8	0.869	0.987	0.768	0.652	0.734
Q9P266	Junctional protein associated with coronary artery disease OS=Homo sapiens GN=KIAA1462 PE=1 SV=3	4	148.3	1.16	1.142	1.152	0.814	0.916
Q9P265	Disco-interacting protein 2 homolog B OS=Homo sapiens GN=DIP2B PE=1 SV=3	28	171.4	1.106	1.011	1.032	1.119	1.166
Q9P260-2	Isoform 2 of LisH domain and HEAT repeat-containing protein KIAA1468 OS=Homo sapiens GN=KIAA1468	28	138.7	0.896	0.887	0.851	0.847	0.71
Q9P253	Vacuolar protein sorting-associated protein 18 homolog OS=Homo sapiens GN=VPS18 PE=1 SV=2	18	110.1	0.787	0.884	0.838	0.815	0.788
Q9P242	Neuronal tyrosine-phosphorylated phosphoinositide-3-kinase adapter 2 OS=Homo sapiens GN=NYAP2 PE=1 SV=3	4	70.5	0.988	0.828	0.793	0.689	0.645
Q9P232	Contactin-3 OS=Homo sapiens GN=CNTN3 PE=1 SV=3	14	112.8	0.976	0.908	0.913	0.886	0.779
Q9P227	Rho GTPase-activating protein 23 OS=Homo sapiens GN=ARHGAP23 PE=1 SV=2	19	162.1	0.887	0.865	0.871	0.791	0.744
Q9P206-2	Isoform 2 of Uncharacterized protein KIAA1522 OS=Homo sapiens GN=KIAA1522	2	113	1.02	1.134	1.072	1.22	1.181
Q9P1Z2	Calcium-binding and coiled-coil domain-containing protein 1 OS=Homo sapiens GN=CALCOCO1 PE=1 SV=2	18	77.3	0.782	0.835	0.805	0.755	0.623
Q9P1Y5-2	Isoform 2 of Calmodulin-regulated spectrin-associated protein 3 OS=Homo sapiens GN=CAMSAP3	37	137.8	0.989	0.946	0.964	0.878	0.834
Q9P1U1	Actin-related protein 3B OS=Homo sapiens GN=ACTR3B PE=2 SV=1	47	47.6	0.891	0.916	0.942	0.972	0.93
Q9P1F3	Costars family protein ABRACL OS=Homo sapiens GN=ABRACL PE=1 SV=1	3	9.1
Q9P0U4-2	Isoform 2 of CXXC-type zinc finger protein 1 OS=Homo sapiens GN=CXXC1	3	76.2	0.996	1	0.959	0.831	0.744
Q9P0U1	Mitochondrial import receptor subunit TOM7 homolog OS=Homo sapiens GN=TOMM7 PE=1 SV=1	6	6.2	0.783	0.972	0.814	0.507	0.56
Q9P0T4	Zinc finger protein 581 OS=Homo sapiens GN=ZNF581 PE=1 SV=1	2	22	0.861	1.085	1.047	1.034	1.193
Q9P0R6	GSK3-beta interaction protein OS=Homo sapiens GN=GSKIP PE=1 SV=2	1	15.6	1.12	1.007	0.952	0.946	0.915
Q9P0M6	Core histone macro-H2A.2 OS=Homo sapiens GN=H2AFY2 PE=1 SV=3	16	40	0.935	0.91	0.927	0.991	0.901
Q9P0L2	Serine/threonine-protein kinase MARK1 OS=Homo sapiens GN=MARK1 PE=1 SV=2	26	88.9	0.891	0.866	0.793	0.679	0.671
Q9P0L0	Vesicle-associated membrane protein-associated protein A OS=Homo sapiens GN=VAPA PE=1 SV=3	82	27.9	1.289	1.198	1.258	0.977	1.134
Q9P0K9	DOMON domain-containing protein FRRS1L OS=Homo sapiens GN=FRRS1L PE=1 SV=2	17	37.2	1.029	1.012	1.175	1.204	1.053
Q9P0K1	Disintegrin and metalloproteinase domain-containing protein 22 OS=Homo sapiens GN=ADAM22 PE=1 SV=1	83	100.4	1.065	1.294	1.299	1.41	1.704
Q9P0J0	NADH dehydrogenase [ubiquinone] 1 alpha subcomplex subunit 13 OS=Homo sapiens GN=NDUFA13 PE=1 SV=3	42	16.7	0.91	1.132	0.911	0.828	0.857
Q9P0I2	ER membrane protein complex subunit 3 OS=Homo sapiens GN=EMC3 PE=1 SV=3	2	29.9	0.587	0.842	0.679	0.447	0.396
Q9P0H9	RER1 protein OS=Homo sapiens GN=RER1 PE=1 SV=1	6	24.8	0.907	1.227	0.985	1.064	0.967
Q9P0H2	Glutamate receptor subunit 3 OS=Homo sapiens GN=GRIA3 PE=3 SV=1	32	101.1	0.676	0.767	0.663	0.672	0.468
Q9P0C9	HSPC107 (Fragment) OS=Homo sapiens PE=2 SV=1	2	17.4	1.151	1.037	1.063	0.936	1.137
Q9P035	Very-long-chain (3R)-3-hydroxyacyl-CoA dehydratase 3 OS=Homo sapiens GN=HACD3 PE=1 SV=2	16	43.1	0.784	0.978	0.896	0.901	0.827
Q9P032	NADH dehydrogenase [ubiquinone] 1 alpha subcomplex assembly factor 4 OS=Homo sapiens GN=NDUFAF4 PE=1 SV=1	11	20.3	0.768	0.944	0.764	0.688	0.835
Q9P021	Cysteine-rich PDZ-binding protein OS=Homo sapiens GN=CRIPT PE=1 SV=1	4	11.2	1.173	1.185	1.436	1.51	1.919
Q9P013	Spliceosome-associated protein CWC15 homolog OS=Homo sapiens GN=CWC15 PE=1 SV=2	4	26.6	1.018	1.106	1.236	1.15	1.205
Q9NZZ3	Charged multivesicular body protein 5 OS=Homo sapiens GN=CHMP5 PE=1 SV=1	20	24.6	1.624	1.352	1.351	1.05	1.372
Q9NZW5	MAGUK p55 subfamily member 6 OS=Homo sapiens GN=MPP6 PE=1 SV=2	38	61.1	0.881	0.865	0.875	0.847	0.763
Q9NZU7	Calcium-binding protein 1 OS=Homo sapiens GN=CABP1 PE=1 SV=5	8	39.8	0.774	1.111	0.814	0.67	0.778
Q9NZU5	LIM and cysteine-rich domains protein 1 OS=Homo sapiens GN=LMCD1 PE=1 SV=1	4	40.8	0.875	0.723	0.82	0.785	0.805
Q9NZR2	Low-density lipoprotein receptor-related protein 1B OS=Homo sapiens GN=LRP1B PE=1 SV=2	25	515.2	1.125	1.015	1.184	1.141	1.19
Q9NZQ3	NCK-interacting protein with SH3 domain OS=Homo sapiens GN=NCKIPSD PE=1 SV=1	35	78.9	0.949	0.959	0.946	0.818	0.793
Q9NZN5	Rho guanine nucleotide exchange factor 12 OS=Homo sapiens GN=ARHGEF12 PE=1 SV=1	23	173.1	1.049	1.041	1.085	1.047	0.941
Q9NZN4	EH domain-containing protein 2 OS=Homo sapiens GN=EHD2 PE=1 SV=2	22	61.1	0.93	0.954	1.103	0.872	0.809
Q9NZN3	EH domain-containing protein 3 OS=Homo sapiens GN=EHD3 PE=1 SV=2	98	60.8	1.025	0.911	0.984	0.748	0.691
Q9NZN1	Interleukin-1 receptor accessory protein-like 1 OS=Homo sapiens GN=IL1RAPL1 PE=1 SV=2	4	79.9	0.85	1.17	0.821	0.787	0.581
Q9NZM3	Intersectin-2 OS=Homo sapiens GN=ITSN2 PE=1 SV=3	20	193.3	0.846	0.943	0.857	0.711	0.636
Q9NZM1	Myoferlin OS=Homo sapiens GN=MYOF PE=1 SV=1	2	234.6	1.003	1.195	1.081	1.28	1.044
Q9NZL4-3	Isoform 3 of Hsp70-binding protein 1 OS=Homo sapiens GN=HSPBP1	16	44.5	0.817	0.851	0.867	0.888	1.011
Q9NZJ6	Ubiquinone biosynthesis O-methyltransferase, mitochondrial OS=Homo sapiens GN=COQ3 PE=1 SV=3	13	41	1.202	1.441	1.231	1.217	1.243
Q9NZJ4	Sacsin OS=Homo sapiens GN=SACS PE=1 SV=2	12	520.8	1.1	1.099	1.014	0.917	0.904
Q9NZE8	39S ribosomal protein L35, mitochondrial OS=Homo sapiens GN=MRPL35 PE=1 SV=3	4	21.5	0.821	0.992	0.861	0.774	0.767
Q9NZB8	Molybdenum cofactor biosynthesis protein 1 OS=Homo sapiens GN=MOCS1 PE=1 SV=3	2	70.1
Q9NZB2-6	Isoform F of Constitutive coactivator of PPAR-gamma-like protein 1 OS=Homo sapiens GN=FAM120A	41	125.2	0.888	0.95	0.874	0.889	0.894
Q9NZ63	Uncharacterized protein C9orf78 OS=Homo sapiens GN=C9orf78 PE=1 SV=1	3	33.7	1.039	0.983	1.159	0.914	0.891
Q9NZ56	Formin-2 OS=Homo sapiens GN=FMN2 PE=1 SV=4	28	180	1.016	0.946	0.96	0.977	0.875
Q9NZ53	Podocalyxin-like protein 2 OS=Homo sapiens GN=PODXL2 PE=1 SV=1	10	65	0.552	0.881	0.593	0.854	0.67
Q9NZ52	ADP-ribosylation factor-binding protein GGA3 OS=Homo sapiens GN=GGA3 PE=1 SV=1	15	78.3	1.077	1.115	1.054	0.993	1.011
Q9NZ43	Vesicle transport protein USE1 OS=Homo sapiens GN=USE1 PE=1 SV=2	4	29.4	0.945	0.953	0.965	0.86	0.907
Q9NZ32	Actin-related protein 10 OS=Homo sapiens GN=ACTR10 PE=1 SV=1	17	46.3	1.137	0.982	1.029	0.862	0.892
Q9NZ09-4	Isoform 4 of Ubiquitin-associated protein 1 OS=Homo sapiens GN=UBAP1	4	61.8	0.97	0.937	0.893	0.745	0.765
Q9NZ08-2	Isoform 2 of Endoplasmic reticulum aminopeptidase 1 OS=Homo sapiens GN=ERAP1	4	107.8	1.115	1.105	1.03	1.166	1.245
Q9NYV4	Cyclin-dependent kinase 12 OS=Homo sapiens GN=CDK12 PE=1 SV=2	4	164.1	1.325	1.003	1.01	1.02	1.415
Q9NYU2	UDP-glucose:glycoprotein glucosyltransferase 1 OS=Homo sapiens GN=UGGT1 PE=1 SV=3	61	177.1	1.001	1.057	1.007	0.99	1.058
Q9NYK5-2	Isoform 2 of 39S ribosomal protein L39, mitochondrial OS=Homo sapiens GN=MRPL39	4	40.4	0.803	1.013	0.885	0.848	0.829
Q9NYI0	PH and SEC7 domain-containing protein 3 OS=Homo sapiens GN=PSD3 PE=1 SV=2	103	116	0.907	0.867	0.828	0.666	0.523
Q9NYF8	Bcl-2-associated transcription factor 1 OS=Homo sapiens GN=BCLAF1 PE=1 SV=2	20	106.1	0.852	0.962	0.855	0.813	0.81
Q9NYF3	Protein FAM53C OS=Homo sapiens GN=FAM53C PE=1 SV=1	2	43.1	1.15	0.869	1.002	0.906	0.924
Q9NYB5-3	Isoform 3 of Solute carrier organic anion transporter family member 1C1 OS=Homo sapiens GN=SLCO1C1	2	80.6	0.644	0.852	0.834	0.865	0.749
Q9NYB0	Telomeric repeat-binding factor 2-interacting protein 1 OS=Homo sapiens GN=TERF2IP PE=1 SV=1	6	44.2	0.972	0.922	0.893	0.794	0.746
Q9NY59	Sphingomyelin phosphodiesterase 3 OS=Homo sapiens GN=SMPD3 PE=1 SV=1	21	71	1.092	1.211	1.01	0.889	0.902
Q9NY47	Voltage-dependent calcium channel subunit alpha-2/delta-2 OS=Homo sapiens GN=CACNA2D2 PE=1 SV=2	44	129.7	0.948	1.11	1.026	0.982	0.935
Q9NY27	Serine/threonine-protein phosphatase 4 regulatory subunit 2 OS=Homo sapiens GN=PPP4R2 PE=1 SV=3	5	46.9	0.883	0.903	0.832	0.884	0.931
Q9NXW9	Alpha-ketoglutarate-dependent dioxygenase alkB homolog 4 OS=Homo sapiens GN=ALKBH4 PE=1 SV=1	2	33.8	0.89	1.06	1.018	0.957	0.942
Q9NXV6	CDKN2A-interacting protein OS=Homo sapiens GN=CDKN2AIP PE=1 SV=3	5	61.1	0.882	0.97	1.147	0.981	1.055
Q9NXV2	BTB/POZ domain-containing protein KCTD5 OS=Homo sapiens GN=KCTD5 PE=1 SV=1	1	26.1	0.939	0.918	1.003	1.201	1.278
Q9NXS2	Glutaminyl-peptide cyclotransferase-like protein OS=Homo sapiens GN=QPCTL PE=1 SV=2	2	42.9	1.014	1.086	1.136	1.019	0.9
Q9NXR7	BRCA1-A complex subunit BRE OS=Homo sapiens GN=BRE PE=1 SV=2	6	43.5	1.124	1.061	1.291	1.394	1.316
Q9NXR1	Nuclear distribution protein nudE homolog 1 OS=Homo sapiens GN=NDE1 PE=1 SV=2	14	38.8	1.037	1.044	0.989	1.244	1.552
Q9NXE4-4	Isoform 4 of Sphingomyelin phosphodiesterase 4 OS=Homo sapiens GN=SMPD4	2	98.1	1.533	1.35	1.4	1.128	1.085
Q9NXC2	Glucose-fructose oxidoreductase domain-containing protein 1 OS=Homo sapiens GN=GFOD1 PE=1 SV=1	6	43.1	0.905	0.96	0.88	0.779	0.747
Q9NX76	CKLF-like MARVEL transmembrane domain-containing protein 6 OS=Homo sapiens GN=CMTM6 PE=1 SV=1	2	20.4	0.608	0.691	0.591	0.567	0.465
Q9NX62	Inositol monophosphatase 3 OS=Homo sapiens GN=IMPAD1 PE=1 SV=1	2	38.7	0.946	1.256	1.065	0.788	0.805
Q9NX47	E3 ubiquitin-protein ligase MARCH5 OS=Homo sapiens GN=MARCH5 PE=1 SV=1	6	31.2	0.478	0.753	0.54	0.44	0.416
Q9NX46	Poly(ADP-ribose) glycohydrolase ARH3 OS=Homo sapiens GN=ADPRHL2 PE=1 SV=1	18	38.9	1.218	1.119	1.396	1.267	1.335
Q9NX40	OCIA domain-containing protein 1 OS=Homo sapiens GN=OCIAD1 PE=1 SV=1	30	27.6	1.152	1.229	1.165	1.071	1.049
Q9NX24	H/ACA ribonucleoprotein complex subunit 2 OS=Homo sapiens GN=NHP2 PE=1 SV=1	7	17.2	1.161	1.158	1.166	1.365	1.378
Q9NX18	Succinate dehydrogenase assembly factor 2, mitochondrial OS=Homo sapiens GN=SDHAF2 PE=1 SV=1	3	19.6	1.222	1.16	1.19	0.827	1.225
Q9NX14-2	Isoform 2 of NADH dehydrogenase [ubiquinone] 1 beta subcomplex subunit 11, mitochondrial OS=Homo sapiens GN=NDUFB11	22	18.4	0.976	1.13	0.995	0.954	0.946
Q9NX08	COMM domain-containing protein 8 OS=Homo sapiens GN=COMMD8 PE=1 SV=1	9	21.1	0.954	0.948	0.964	0.938	0.966
Q9NX05	Constitutive coactivator of PPAR-gamma-like protein 2 OS=Homo sapiens GN=FAM120C PE=2 SV=3	4	120.5	0.825	0.658	0.944	0.863	0.888
Q9NX00	Transmembrane protein 160 OS=Homo sapiens GN=TMEM160 PE=1 SV=1	6	19.6	0.819	1.118	0.967	0.947	0.853
Q9NWY4	Histone PARylation factor 1 OS=Homo sapiens GN=HPF1 PE=1 SV=2	2	39.4	1.411	1.536	1.437	1.413	1.528
Q9NWV4	UPF0587 protein C1orf123 OS=Homo sapiens GN=C1orf123 PE=1 SV=1	13	18	0.977	0.884	1.202	1.03	1.076
Q9NWU2	Glucose-induced degradation protein 8 homolog OS=Homo sapiens GN=GID8 PE=1 SV=1	4	26.7	1.039	0.938	0.925	0.885	0.82
Q9NWS8	Required for meiotic nuclear division protein 1 homolog OS=Homo sapiens GN=RMND1 PE=1 SV=2	6	51.6	0.831	1.091	0.927	0.919	0.942
Q9NWQ8	Phosphoprotein associated with glycosphingolipid-enriched microdomains 1 OS=Homo sapiens GN=PAG1 PE=1 SV=2	9	47	1.216	1.156	1.123	1.064	1.121
Q9NWM3	CUE domain-containing protein 1 OS=Homo sapiens GN=CUEDC1 PE=1 SV=1	6	42.2	1.215	1.012	0.962	1.061	1.209
Q9NWD9	Protein BEX4 OS=Homo sapiens GN=BEX4 PE=2 SV=1	2	14.1	1.326	1.053	1.176	1.036	1.171
Q9NWB6	Arginine and glutamate-rich protein 1 OS=Homo sapiens GN=ARGLU1 PE=1 SV=1	6	33.2	1.096	1.197	1.07	1.122	0.917
Q9NWA0	Mediator of RNA polymerase II transcription subunit 9 OS=Homo sapiens GN=MED9 PE=1 SV=1	2	16.4
Q9NW68	BSD domain-containing protein 1 OS=Homo sapiens GN=BSDC1 PE=1 SV=1	4	47.1	0.932	0.867	0.874	0.716	0.734
Q9NW64	Pre-mRNA-splicing factor RBM22 OS=Homo sapiens GN=RBM22 PE=1 SV=1	4	46.9	0.922	1.013	0.984	0.97	0.931
Q9NW13	RNA-binding protein 28 OS=Homo sapiens GN=RBM28 PE=1 SV=3	2	85.7	0.925	0.96	0.905	0.921	0.851
Q9NVT9	Armadillo repeat-containing protein 1 OS=Homo sapiens GN=ARMC1 PE=1 SV=1	9	31.3	0.783	0.92	0.817	0.822	0.852
Q9NVS2-2	Isoform 2 of 28S ribosomal protein S18a, mitochondrial OS=Homo sapiens GN=MRPS18A	4	30.5
Q9NVK5	FGFR1 oncogene partner 2 OS=Homo sapiens GN=FGFR1OP2 PE=1 SV=1	12	29.4	0.928	0.964	0.977	0.936	0.847
Q9NVI7-2	Isoform 2 of ATPase family AAA domain-containing protein 3A OS=Homo sapiens GN=ATAD3A	38	66.2	0.857	0.921	0.85	0.703	0.678
Q9NVH6-8	Isoform 8 of Trimethyllysine dioxygenase, mitochondrial OS=Homo sapiens GN=TMLHE	4	50.8	0.229	0.971	0.327	0.938	0.59
Q9NVH1	DnaJ homolog subfamily C member 11 OS=Homo sapiens GN=DNAJC11 PE=1 SV=2	28	63.2	0.967	1.07	0.947	0.918	0.763
Q9NVH0	Exonuclease 3'-5' domain-containing protein 2 OS=Homo sapiens GN=EXD2 PE=1 SV=2	12	70.3	0.972	1.051	1.051	1.119	1.038
Q9NVG8	TBC1 domain family member 13 OS=Homo sapiens GN=TBC1D13 PE=1 SV=3	10	46.5	1.029	0.905	1.077	0.918	0.955
Q9NVA2-2	Isoform 2 of Septin-11 OS=Homo sapiens GN=SEPT11	143	50.8	0.836	0.89	0.867	0.934	0.791
Q9NVA1	Ubiquinol-cytochrome-c reductase complex assembly factor 1 OS=Homo sapiens GN=UQCC1 PE=1 SV=3	10	34.6	0.938	1.101	1.017	0.965	0.964
Q9NV96	Cell cycle control protein 50A OS=Homo sapiens GN=TMEM30A PE=1 SV=1	67	40.7	0.872	0.915	0.989	0.987	0.819
Q9NV92	NEDD4 family-interacting protein 2 OS=Homo sapiens GN=NDFIP2 PE=1 SV=2	2	36.4	0.714	0.902	0.879	0.922	0.785
Q9NUY8	TBC1 domain family member 23 OS=Homo sapiens GN=TBC1D23 PE=1 SV=3	4	78.3	0.958	1.08	1.075	1.272	1.226
Q9NUU7	ATP-dependent RNA helicase DDX19A OS=Homo sapiens GN=DDX19A PE=1 SV=1	14	53.9	0.965	0.921	0.883	0.895	0.876
Q9NUT2	ATP-binding cassette sub-family B member 8, mitochondrial OS=Homo sapiens GN=ABCB8 PE=1 SV=3	16	79.9	1.051	1.118	0.989	0.932	0.859
Q9NUS5	AP-5 complex subunit sigma-1 OS=Homo sapiens GN=AP5S1 PE=1 SV=1	2	22.5	1.029	1.109	1.124	2.585	1.06
Q9NUQ7	Ufm1-specific protease 2 OS=Homo sapiens GN=UFSP2 PE=1 SV=3	6	53.2	0.967	0.998	1.019	0.738	0.757
Q9NUQ6-3	Isoform 3 of SPATS2-like protein OS=Homo sapiens GN=SPATS2L	6	65.1	0.957	1.022	0.937	0.932	0.855
Q9NUQ2	1-acyl-sn-glycerol-3-phosphate acyltransferase epsilon OS=Homo sapiens GN=AGPAT5 PE=1 SV=3	8	42	0.972	1.086	1.048	1.151	1.153
Q9NUN5	Probable lysosomal cobalamin transporter OS=Homo sapiens GN=LMBRD1 PE=1 SV=1	2	61.3	1.234	1.404	1.829	2.675	2.845
Q9NUL5	Repressor of yield of DENV protein OS=Homo sapiens GN=RYDEN PE=1 SV=2	8	33.1	1.014	1.003	0.857	0.856	0.901
Q9NUJ1	Mycophenolic acid acyl-glucuronide esterase, mitochondrial OS=Homo sapiens GN=ABHD10 PE=1 SV=1	14	33.9	0.744	0.962	0.981	1.223	1.191
Q9NUI1	Peroxisomal 2,4-dienoyl-CoA reductase OS=Homo sapiens GN=DECR2 PE=1 SV=1	3	30.8	1.038	1.365	1	0.993	0.935
Q9NUB1	Acetyl-coenzyme A synthetase 2-like, mitochondrial OS=Homo sapiens GN=ACSS1 PE=1 SV=2	20	74.8	0.957	0.91	0.978	0.927	0.949
Q9NTX5	Ethylmalonyl-CoA decarboxylase OS=Homo sapiens GN=ECHDC1 PE=1 SV=2	31	33.7	1.007	1.085	0.977	1.143	1.276
Q9NTM9	Copper homeostasis protein cutC homolog OS=Homo sapiens GN=CUTC PE=1 SV=1	2	29.3	0.929	0.904	0.952	1.402	1.288
Q9NTJ5	Phosphatidylinositide phosphatase SAC1 OS=Homo sapiens GN=SACM1L PE=1 SV=2	32	66.9	0.951	1.03	0.986	0.958	0.912
Q9NTI5	Sister chromatid cohesion protein PDS5 homolog B OS=Homo sapiens GN=PDS5B PE=1 SV=1	14	164.6	0.95	0.924	0.944	0.918	0.881
Q9NT99	Leucine-rich repeat-containing protein 4B OS=Homo sapiens GN=LRRC4B PE=2 SV=3	6	76.4	0.885	0.944	0.834	0.851	0.804
Q9NT62	Ubiquitin-like-conjugating enzyme ATG3 OS=Homo sapiens GN=ATG3 PE=1 SV=1	15	35.8	1.016	1.011	1.097	1.098	1.179
Q9NSY0	Nuclear receptor-binding protein 2 OS=Homo sapiens GN=NRBP2 PE=1 SV=2	6	57.8	1.006	1.018	0.958	0.897	0.848
Q9NSU2	Three-prime repair exonuclease 1 OS=Homo sapiens GN=TREX1 PE=1 SV=1	4	38.9	1.11	1.012	0.935	0.72	0.874
Q9NSK0-3	Isoform 3 of Kinesin light chain 4 OS=Homo sapiens GN=KLC4	22	70.5	1.119	1.046	1.03	0.867	0.968
Q9NSI6	Bromodomain and WD repeat-containing protein 1 OS=Homo sapiens GN=BRWD1 PE=1 SV=4	1	262.8
Q9NSE4	Isoleucine--tRNA ligase, mitochondrial OS=Homo sapiens GN=IARS2 PE=1 SV=2	60	113.7	0.821	0.891	0.892	0.823	0.784
Q9NSD9	Phenylalanine--tRNA ligase beta subunit OS=Homo sapiens GN=FARSB PE=1 SV=3	66	66.1	0.778	0.839	0.788	0.856	0.704
Q9NSD5	Sodium- and chloride-dependent GABA transporter 2 OS=Homo sapiens GN=SLC6A13 PE=1 SV=3	2	68	0.929	1.172	1.33	1.544	1.568
Q9NS61-6	Isoform 6 of Kv channel-interacting protein 2 OS=Homo sapiens GN=KCNIP2	2	32.5	0.758	0.789	0.732	0.75	0.707
Q9NRZ7-3	Isoform 3 of 1-acyl-sn-glycerol-3-phosphate acyltransferase gamma OS=Homo sapiens GN=AGPAT3	8	45.5	0.837	0.945	0.851	0.873	0.819
Q9NRZ5	1-acyl-sn-glycerol-3-phosphate acyltransferase delta OS=Homo sapiens GN=AGPAT4 PE=1 SV=1	8	44	0.884	0.861	0.737	0.738	0.776
Q9NRY4	Rho GTPase-activating protein 35 OS=Homo sapiens GN=ARHGAP35 PE=1 SV=3	36	170.4	0.797	0.828	0.816	0.79	0.705
Q9NRY2	SOSS complex subunit C OS=Homo sapiens GN=INIP PE=1 SV=1	2	11.4	0.881	1.178	0.942	0.585	0.978
Q9NRX5	Serine incorporator 1 OS=Homo sapiens GN=SERINC1 PE=1 SV=1	6	50.5	1.292	1.153	1.304	1.248	1.299
Q9NRX2	39S ribosomal protein L17, mitochondrial OS=Homo sapiens GN=MRPL17 PE=1 SV=1	2	20	0.801	1.024	0.868	0.466	0.586
Q9NRW7	Vacuolar protein sorting-associated protein 45 OS=Homo sapiens GN=VPS45 PE=1 SV=1	19	65	1.047	0.875	0.845	0.796	0.762
Q9NRW1	Ras-related protein Rab-6B OS=Homo sapiens GN=RAB6B PE=1 SV=1	97	23.4	0.952	0.952	0.959	1.025	1
Q9NRV9	Heme-binding protein 1 OS=Homo sapiens GN=HEBP1 PE=1 SV=1	21	21.1	1.13	1.01	1.078	1.157	1.477
Q9NRU3	Metal transporter CNNM1 OS=Homo sapiens GN=CNNM1 PE=2 SV=3	8	104.3	0.724	0.879	0.788	0.82	0.791
Q9NRR6	72 kDa inositol polyphosphate 5-phosphatase OS=Homo sapiens GN=INPP5E PE=1 SV=2	1	70.2
Q9NRR5	Ubiquilin-4 OS=Homo sapiens GN=UBQLN4 PE=1 SV=2	33	63.8	1.041	1.036	0.963	0.951	0.999
Q9NRR3	CDC42 small effector protein 2 OS=Homo sapiens GN=CDC42SE2 PE=1 SV=1	4	9.2	1.332	1.203	1.038	1.045	1.379
Q9NRN7	L-aminoadipate-semialdehyde dehydrogenase-phosphopantetheinyl transferase OS=Homo sapiens GN=AASDHPPT PE=1 SV=2	14	35.8	0.692	0.751	0.778	0.712	0.631
Q9NRL3-3	Isoform 3 of Striatin-4 OS=Homo sapiens GN=STRN4	12	81.2	0.955	0.969	0.882	0.825	0.816
Q9NRK6	ATP-binding cassette sub-family B member 10, mitochondrial OS=Homo sapiens GN=ABCB10 PE=1 SV=2	4	79.1	0.992	1.06	0.926	0.836	0.814
Q9NRG7	Epimerase family protein SDR39U1 OS=Homo sapiens GN=SDR39U1 PE=1 SV=2	6	34.7	0.813	0.907	0.929	0.729	0.854
Q9NRG1	Phosphoribosyltransferase domain-containing protein 1 OS=Homo sapiens GN=PRTFDC1 PE=1 SV=1	2	25.7	0.666	0.831	0.651	0.687	0.669
Q9NRD1	F-box only protein 6 OS=Homo sapiens GN=FBXO6 PE=1 SV=1	4	33.9	1.027	0.895	1.321	0.88	0.787
Q9NRA8-3	Isoform 3 of Eukaryotic translation initiation factor 4E transporter OS=Homo sapiens GN=EIF4ENIF1	2	108.3	0.609	0.767	0.764	0.772	0.723
Q9NRA0-5	Isoform 5 of Sphingosine kinase 2 OS=Homo sapiens GN=SPHK2	2	80.2	1.13	1.107	1.08	1.053	1.013
Q9NR50	Translation initiation factor eIF-2B subunit gamma OS=Homo sapiens GN=EIF2B3 PE=1 SV=1	6	50.2	0.98	0.898	0.968	1.067	1.181
Q9NR46-2	Isoform 2 of Endophilin-B2 OS=Homo sapiens GN=SH3GLB2	64	44.7	1.047	1.034	1.267	1.27	1.223
Q9NR45	Sialic acid synthase OS=Homo sapiens GN=NANS PE=1 SV=2	35	40.3	0.877	0.868	1.054	1.059	0.974
Q9NR34	Mannosyl-oligosaccharide 1,2-alpha-mannosidase IC OS=Homo sapiens GN=MAN1C1 PE=1 SV=1	2	70.9	1.329	1.386	1.646	1.401	1.224
Q9NR31	GTP-binding protein SAR1a OS=Homo sapiens GN=SAR1A PE=1 SV=1	17	22.4	0.781	0.883	0.867	0.913	0.721
Q9NR19-2	Isoform 2 of Acetyl-coenzyme A synthetase, cytoplasmic OS=Homo sapiens GN=ACSS2	4	80	1.137	1.063	1.021	0.923	1.002
Q9NR09	Baculoviral IAP repeat-containing protein 6 OS=Homo sapiens GN=BIRC6 PE=1 SV=2	2	529.9	0.689	0.713	0.695	0.727	0.627
Q9NQZ5	StAR-related lipid transfer protein 7, mitochondrial OS=Homo sapiens GN=STARD7 PE=1 SV=2	2	43.1	1.179	1.301	1.064	1.044	1.005
Q9NQZ2	Something about silencing protein 10 OS=Homo sapiens GN=UTP3 PE=1 SV=1	2	54.5	0.493	0.603	0.487	0.705	0.747
Q9NQX3-2	Isoform 2 of Gephyrin OS=Homo sapiens GN=GPHN	66	83.4	0.967	0.989	0.963	0.934	0.905
Q9NQW7-3	Isoform 3 of Xaa-Pro aminopeptidase 1 OS=Homo sapiens GN=XPNPEP1	37	74.8	1.015	0.946	1.063	1.053	1.017
Q9NQW6	Anillin OS=Homo sapiens GN=ANLN PE=1 SV=2	38	124.1	1.207	1.235	1.217	1.628	1.796
Q9NQT8	Kinesin-like protein KIF13B OS=Homo sapiens GN=KIF13B PE=1 SV=2	8	202.7	1.082	0.964	1.094	1.057	1.383
Q9NQR7	Coiled-coil domain-containing protein 177 OS=Homo sapiens GN=CCDC177 PE=2 SV=3	27	79.7	1.175	1.19	1.135	1.038	0.983
Q9NQH7	Probable Xaa-Pro aminopeptidase 3 OS=Homo sapiens GN=XPNPEP3 PE=1 SV=1	8	57	0.879	0.923	0.817	1.021	1.089
Q9NQG5	Regulation of nuclear pre-mRNA domain-containing protein 1B OS=Homo sapiens GN=RPRD1B PE=1 SV=1	7	36.9	0.874	0.947	0.998	0.996	1.042
Q9NQE9	Histidine triad nucleotide-binding protein 3 OS=Homo sapiens GN=HINT3 PE=1 SV=1	10	20.3	1.117	1.121	1.062	1.106	1.237
Q9NQC7	Ubiquitin carboxyl-terminal hydrolase CYLD OS=Homo sapiens GN=CYLD PE=1 SV=1	6	107.2	0.823	0.786	0.808	0.785	0.651
Q9NQC3	Reticulon-4 OS=Homo sapiens GN=RTN4 PE=1 SV=2	172	129.9	0.97	0.969	0.863	0.793	0.916
Q9NQ89	Protein C12orf4 OS=Homo sapiens GN=C12orf4 PE=2 SV=1	6	63.8	0.856	0.808	0.858	0.748	0.82
Q9NQ88	Fructose-2,6-bisphosphatase TIGAR OS=Homo sapiens GN=TIGAR PE=1 SV=1	6	30	0.906	1.044	0.933	0.899	0.881
Q9NQ86	E3 ubiquitin-protein ligase TRIM36 OS=Homo sapiens GN=TRIM36 PE=1 SV=2	8	83	0.691	0.795	0.627	0.581	0.481
Q9NQ79	Cartilage acidic protein 1 OS=Homo sapiens GN=CRTAC1 PE=1 SV=2	32	71.4	1.095	1.264	1.35	1.137	1.21
Q9NQ66	1-phosphatidylinositol 4,5-bisphosphate phosphodiesterase beta-1 OS=Homo sapiens GN=PLCB1 PE=1 SV=1	143	138.5	0.818	0.981	0.828	0.794	0.812
Q9NQ50	39S ribosomal protein L40, mitochondrial OS=Homo sapiens GN=MRPL40 PE=1 SV=1	9	24.5	0.864	0.975	0.878	0.662	0.747
Q9NQ48	Leucine zipper transcription factor-like protein 1 OS=Homo sapiens GN=LZTFL1 PE=1 SV=1	48	34.6	1.02	0.907	0.968	0.926	0.864
Q9NQ38-3	Isoform long of Serine protease inhibitor Kazal-type 5 OS=Homo sapiens GN=SPINK5	3	124	1.312	1.26	1.088	1.255	2.387
Q9NQ11	Probable cation-transporting ATPase 13A2 OS=Homo sapiens GN=ATP13A2 PE=1 SV=2	8	128.7	0.954	1.058	0.969	0.946	0.866
Q9NPQ8	Synembryn-A OS=Homo sapiens GN=RIC8A PE=1 SV=3	14	59.7	1.186	1.096	1.396	1.173	1.217
Q9NPL8	Complex I assembly factor TIMMDC1, mitochondrial OS=Homo sapiens GN=TIMMDC1 PE=1 SV=2	4	32.2	1.11	1.307	1.052	0.839	0.94
Q9NPJ3	Acyl-coenzyme A thioesterase 13 OS=Homo sapiens GN=ACOT13 PE=1 SV=1	16	15	1.007	1.01	0.933	0.845	0.985
Q9NPH2	Inositol-3-phosphate synthase 1 OS=Homo sapiens GN=ISYNA1 PE=1 SV=1	8	61	0.998	0.937	1.045	1.094	1.004
Q9NPG1	Frizzled-3 OS=Homo sapiens GN=FZD3 PE=1 SV=1	2	76.2	0.822	0.926	0.891	0.856	0.743
Q9NPF5	DNA methyltransferase 1-associated protein 1 OS=Homo sapiens GN=DMAP1 PE=1 SV=1	2	53
Q9NPF4	Probable tRNA N6-adenosine threonylcarbamoyltransferase OS=Homo sapiens GN=OSGEP PE=1 SV=1	6	36.4	0.758	0.963	1.031	0.851	0.815
Q9NPE3	H/ACA ribonucleoprotein complex subunit 3 OS=Homo sapiens GN=NOP10 PE=1 SV=1	2	7.7	1.174	1.11	1.197	1.311	1.035
Q9NPB8	Glycerophosphocholine phosphodiesterase GPCPD1 OS=Homo sapiens GN=GPCPD1 PE=1 SV=2	6	76	0.88	1.155	0.901	1.01	1.457
Q9NP90	Ras-related protein Rab-9B OS=Homo sapiens GN=RAB9B PE=1 SV=1	8	22.7	0.984	1.085	1.056	0.922	0.816
Q9NP79	Vacuolar protein sorting-associated protein VTA1 homolog OS=Homo sapiens GN=VTA1 PE=1 SV=1	14	33.9	0.974	0.944	0.906	0.845	0.809
Q9NP72	Ras-related protein Rab-18 OS=Homo sapiens GN=RAB18 PE=1 SV=1	42	23	0.914	0.979	0.88	1.011	0.991
Q9NP61	ADP-ribosylation factor GTPase-activating protein 3 OS=Homo sapiens GN=ARFGAP3 PE=1 SV=1	2	56.9	1.109	0.965	0.994	1.016	1.059
Q9HDC9	Adipocyte plasma membrane-associated protein OS=Homo sapiens GN=APMAP PE=1 SV=2	85	46.5	1.181	1.17	1.115	0.992	1.032
Q9HDC5	Junctophilin-1 OS=Homo sapiens GN=JPH1 PE=1 SV=2	4	71.6	1.126	1.076	1.194	0.974	0.91
Q9HD45	Transmembrane 9 superfamily member 3 OS=Homo sapiens GN=TM9SF3 PE=1 SV=2	2	67.8
Q9HD42	Charged multivesicular body protein 1a OS=Homo sapiens GN=CHMP1A PE=1 SV=1	11	21.7	1.055	0.971	0.95	0.849	0.868
Q9HD40	O-phosphoseryl-tRNA(Sec) selenium transferase OS=Homo sapiens GN=SEPSECS PE=1 SV=2	2	55.7	1.408	1.419	1.255	1.309	1.793
Q9HD33	39S ribosomal protein L47, mitochondrial OS=Homo sapiens GN=MRPL47 PE=1 SV=2	2	29.4	0.576	0.806	0.645	0.535	0.564
Q9HD26	Golgi-associated PDZ and coiled-coil motif-containing protein OS=Homo sapiens GN=GOPC PE=1 SV=1	6	50.5	0.91	0.924	0.856	0.836	0.712
Q9HD20	Manganese-transporting ATPase 13A1 OS=Homo sapiens GN=ATP13A1 PE=1 SV=2	24	132.9	0.889	0.957	0.91	0.854	0.804
Q9HCU4	Cadherin EGF LAG seven-pass G-type receptor 2 OS=Homo sapiens GN=CELSR2 PE=1 SV=1	8	317.3	1.097	1.101	1.079	1.036	1.017
Q9HCP6	Protein-cysteine N-palmitoyltransferase HHAT-like protein OS=Homo sapiens GN=HHATL PE=2 SV=1	6	56.7	1.313	1.275	1.235	1.329	1.35
Q9HCN4-5	Isoform 5 of GPN-loop GTPase 1 OS=Homo sapiens GN=GPN1	2	43.3
Q9HCM4	Band 4.1-like protein 5 OS=Homo sapiens GN=EPB41L5 PE=1 SV=3	2	81.8
Q9HCM3	UPF0606 protein KIAA1549 OS=Homo sapiens GN=KIAA1549 PE=1 SV=4	8	210.6	1.211	1.009	1.131	0.917	0.849
Q9HCM2	Plexin-A4 OS=Homo sapiens GN=PLXNA4 PE=1 SV=4	88	212.3	0.91	1.007	0.944	0.854	0.813
Q9HCH3	Copine-5 OS=Homo sapiens GN=CPNE5 PE=1 SV=2	80	65.7	1.048	0.981	0.989	0.984	0.877
Q9HCF6-11	Isoform 11 of Transient receptor potential cation channel subfamily M member 3 OS=Homo sapiens GN=TRPM3	2	197.6
Q9HCE9	Anoctamin-8 OS=Homo sapiens GN=ANO8 PE=1 SV=3	29	135.9	1.033	1.292	1.177	1.097	1.145
Q9HCE6	Rho guanine nucleotide exchange factor 10-like protein OS=Homo sapiens GN=ARHGEF10L PE=1 SV=3	2	140.3	1.02	1.08	1.034	1.008	1.063
Q9HCE5	N6-adenosine-methyltransferase subunit METTL14 OS=Homo sapiens GN=METTL14 PE=1 SV=2	2	52.1	0.8	0.918	0.869	0.937	0.71
Q9HCE0	Ectopic P granules protein 5 homolog OS=Homo sapiens GN=EPG5 PE=1 SV=2	1	292.3
Q9HCD6-2	Isoform 2 of Protein TANC2 OS=Homo sapiens GN=TANC2	26	220.6	0.958	0.994	0.915	0.851	0.765
Q9HCC0	Methylcrotonoyl-CoA carboxylase beta chain, mitochondrial OS=Homo sapiens GN=MCCC2 PE=1 SV=1	35	61.3	0.993	0.992	0.949	1.046	0.962
Q9HCB6	Spondin-1 OS=Homo sapiens GN=SPON1 PE=1 SV=2	10	90.9	0.931	1.013	1.019	1.403	1.398
Q9HC98-2	Isoform 2 of Serine/threonine-protein kinase Nek6 OS=Homo sapiens GN=NEK6	2	39.8
Q9HC58	Sodium/potassium/calcium exchanger 3 OS=Homo sapiens GN=SLC24A3 PE=2 SV=4	2	71.9
Q9HC56	Protocadherin-9 OS=Homo sapiens GN=PCDH9 PE=1 SV=2	52	136	1.043	1.066	1.039	0.949	0.952
Q9HC36	rRNA methyltransferase 3, mitochondrial OS=Homo sapiens GN=MRM3 PE=1 SV=2	6	47	0.785	0.923	1.064	0.875	0.86
Q9HC07	Transmembrane protein 165 OS=Homo sapiens GN=TMEM165 PE=1 SV=1	3	34.9	1.096	1.125	1.02	1.042	1.185
Q9HC06	Cd002 protein OS=Homo sapiens PE=2 SV=1	2	43.5
Q9HC03	Dolichyl-phosphate beta-glucosyltransferase OS=Homo sapiens PE=2 SV=1	2	36.9	1.103	1.079	1.046	1.038	1.009
Q9HBZ2	Aryl hydrocarbon receptor nuclear translocator 2 OS=Homo sapiens GN=ARNT2 PE=1 SV=2	2	78.6	0.73	0.645	0.743	0.834	0.665
Q9HBR0	Putative sodium-coupled neutral amino acid transporter 10 OS=Homo sapiens GN=SLC38A10 PE=1 SV=2	2	119.7	0.888	1.012	0.874	0.917	0.834
Q9HBL8	NmrA-like family domain-containing protein 1 OS=Homo sapiens GN=NMRAL1 PE=1 SV=1	2	33.3
Q9HBI2	Putative uncharacterized protein (Fragment) OS=Homo sapiens PE=4 SV=1	5	12.5	1.058	1.061	0.963	0.929	1.261
Q9HBI1-2	Isoform 2 of Beta-parvin OS=Homo sapiens GN=PARVB	2	45.2	0.779	0.904	0.862	0.881	0.797
Q9HBB3	60S ribosomal protein L6 OS=Homo sapiens PE=2 SV=1	35	32.9	0.995	1.114	0.931	0.957	0.904
Q9HB66	Alternative protein MKKS OS=Homo sapiens GN=MKKS PE=1 SV=1	2	7.3	0.729	0.901	0.613	0.958	1.063
Q9HB40	Retinoid-inducible serine carboxypeptidase OS=Homo sapiens GN=SCPEP1 PE=1 SV=1	2	50.8	0.857	0.849	0.846	1.055	0.784
Q9HAV7	GrpE protein homolog 1, mitochondrial OS=Homo sapiens GN=GRPEL1 PE=1 SV=2	12	24.3	0.693	0.813	0.842	0.679	0.663
Q9HAV0	Guanine nucleotide-binding protein subunit beta-4 OS=Homo sapiens GN=GNB4 PE=1 SV=3	85	37.5	1.106	1.087	1.401	1.72	1.757
Q9HAU5	Regulator of nonsense transcripts 2 OS=Homo sapiens GN=UPF2 PE=1 SV=1	6	147.7	0.816	0.866	0.858	1.065	0.887
Q9HAU0-6	Isoform 6 of Pleckstrin homology domain-containing family A member 5 OS=Homo sapiens GN=PLEKHA5	14	146.8	0.772	0.892	0.823	0.826	0.661
Q9HAT2	Sialate O-acetylesterase OS=Homo sapiens GN=SIAE PE=1 SV=1	6	58.3	0.712	0.894	0.883	1.062	0.942
Q9HAP6	Protein lin-7 homolog B OS=Homo sapiens GN=LIN7B PE=1 SV=1	13	22.9	0.851	0.892	0.848	0.751	0.754
Q9HAB8	Phosphopantothenate--cysteine ligase OS=Homo sapiens GN=PPCS PE=1 SV=2	2	34	0.732	0.905	0.847	1.009	0.729
Q9HAB3	Solute carrier family 52, riboflavin transporter, member 2 OS=Homo sapiens GN=SLC52A2 PE=1 SV=1	1	45.7	1.106	1.029	2.009	3.206	3.16
Q9HA77	Probable cysteine--tRNA ligase, mitochondrial OS=Homo sapiens GN=CARS2 PE=1 SV=1	4	62.2	0.956	1.051	1.077	1.075	0.872
Q9HA65	TBC1 domain family member 17 OS=Homo sapiens GN=TBC1D17 PE=1 SV=2	10	72.7	0.598	0.742	0.661	0.774	0.662
Q9HA47-4	Isoform 4 of Uridine-cytidine kinase 1 OS=Homo sapiens GN=UCK1	2	32.3
Q9H9T3	Elongator complex protein 3 OS=Homo sapiens GN=ELP3 PE=1 SV=2	12	62.2	0.849	0.849	0.815	0.808	0.823
Q9H9S3	Protein transport protein Sec61 subunit alpha isoform 2 OS=Homo sapiens GN=SEC61A2 PE=2 SV=3	4	52.2	0.777	0.886	0.874	0.972	0.733
Q9H9R9-3	Isoform 3 of Dysbindin domain-containing protein 1 OS=Homo sapiens GN=DBNDD1	2	30.3
Q9H9Q2	COP9 signalosome complex subunit 7b OS=Homo sapiens GN=COPS7B PE=1 SV=1	4	29.6	1.148	1.085	1.149	1.234	1.145
Q9H9H5	MAP6 domain-containing protein 1 OS=Homo sapiens GN=MAP6D1 PE=1 SV=1	21	21	1.025	1.072	1.106	1.03	1.268
Q9H9G7	Protein argonaute-3 OS=Homo sapiens GN=AGO3 PE=1 SV=2	14	97.3	1.295	1.163	1.132	1.132	1.228
Q9H9B4	Sideroflexin-1 OS=Homo sapiens GN=SFXN1 PE=1 SV=4	79	35.6	1.146	1.247	1.05	0.899	0.962
Q9H9A6	Leucine-rich repeat-containing protein 40 OS=Homo sapiens GN=LRRC40 PE=1 SV=1	36	68.2	0.906	0.923	0.864	0.801	0.771
Q9H993	Protein-glutamate O-methyltransferase OS=Homo sapiens GN=ARMT1 PE=1 SV=1	18	51.1	0.943	0.831	0.997	0.919	0.931
Q9H977	WD repeat-containing protein 54 OS=Homo sapiens GN=WDR54 PE=1 SV=1	2	35.9	0.955	0.877	0.939	0.966	0.96
Q9H936	Mitochondrial glutamate carrier 1 OS=Homo sapiens GN=SLC25A22 PE=1 SV=1	58	34.4	0.969	1.003	1.16	1.114	0.965
Q9H910-3	Isoform 3 of Hematological and neurological expressed 1-like protein OS=Homo sapiens GN=HN1L	4	23	1.598	1.764	1.699	1.54	2.323
Q9H903	Probable bifunctional methylenetetrahydrofolate dehydrogenase/cyclohydrolase 2 OS=Homo sapiens GN=MTHFD2L PE=2 SV=3	2	37.3	1.035	1.138	1.046	1.048	1.033
Q9H8Y8-3	Isoform 3 of Golgi reassembly-stacking protein 2 OS=Homo sapiens GN=GORASP2	5	48.6	0.908	1.111	1.274	1.417	1.363
Q9H8M7	Ubiquitin carboxyl-terminal hydrolase FAM188A OS=Homo sapiens GN=FAM188A PE=1 SV=1	4	49.7	0.898	0.994	0.888	1.051	1.142
Q9H8M5	Metal transporter CNNM2 OS=Homo sapiens GN=CNNM2 PE=1 SV=2	8	96.6	0.764	0.991	0.983	1.141	1.033
Q9H8M1	Coenzyme Q-binding protein COQ10 homolog B, mitochondrial OS=Homo sapiens GN=COQ10B PE=2 SV=1	4	27.1	1.098	1.014	0.997	0.803	0.979
Q9H871	Protein RMD5 homolog A OS=Homo sapiens GN=RMND5A PE=1 SV=1	2	44	0.694	0.738	0.814	0.972	0.865
Q9H849	cDNA FLJ13946 fis, clone Y79AA1000976 OS=Homo sapiens PE=2 SV=1	1	33.1
Q9H845	Acyl-CoA dehydrogenase family member 9, mitochondrial OS=Homo sapiens GN=ACAD9 PE=1 SV=1	24	68.7	0.635	0.872	0.768	0.792	0.586
Q9H832	Ubiquitin-conjugating enzyme E2 Z OS=Homo sapiens GN=UBE2Z PE=1 SV=2	4	38.2	0.826	0.853	0.892	1.066	1.041
Q9H814	Phosphorylated adapter RNA export protein OS=Homo sapiens GN=PHAX PE=1 SV=1	2	44.4	1.056	0.976	1.249	1.254	0.442
Q9H7Z7	Prostaglandin E synthase 2 OS=Homo sapiens GN=PTGES2 PE=1 SV=1	40	41.9	0.895	0.97	0.823	0.801	0.816
Q9H7Z6-2	Isoform 2 of Histone acetyltransferase KAT8 OS=Homo sapiens GN=KAT8	4	53.1	1.012	0.839	0.951	0.592	0.771
Q9H7P6	Multivesicular body subunit 12B OS=Homo sapiens GN=MVB12B PE=1 SV=2	4	35.6	0.887	0.919	0.84	1.003	1.003
Q9H7E2-3	Isoform 3 of Tudor domain-containing protein 3 OS=Homo sapiens GN=TDRD3	5	83.1	1.07	1.093	1.024	1.048	0.398
Q9H7D7	WD repeat-containing protein 26 OS=Homo sapiens GN=WDR26 PE=1 SV=3	10	72.1	0.845	0.905	0.926	0.839	0.797
Q9H7D0	Dedicator of cytokinesis protein 5 OS=Homo sapiens GN=DOCK5 PE=1 SV=3	18	215.2	1.188	1.076	1.128	1.096	1.264
Q9H792	Pseudopodium-enriched atypical kinase 1 OS=Homo sapiens GN=PEAK1 PE=1 SV=4	2	193	1.065	1.099	1.083	0.966	1.037
Q9H773	dCTP pyrophosphatase 1 OS=Homo sapiens GN=DCTPP1 PE=1 SV=1	2	18.7
Q9H706	GRB2-associated and regulator of MAPK protein 1 OS=Homo sapiens GN=GAREM1 PE=1 SV=2	2	97.1	0.72	0.759	0.722	0.677	0.66
Q9H6Z4	Ran-binding protein 3 OS=Homo sapiens GN=RANBP3 PE=1 SV=1	6	60.2	0.564	0.629	0.619	0.571	0.603
Q9H6Y7	E3 ubiquitin-protein ligase RNF167 OS=Homo sapiens GN=RNF167 PE=1 SV=1	2	38.3	1.062	1.063	1.271	0.772	1.162
Q9H6X2	Anthrax toxin receptor 1 OS=Homo sapiens GN=ANTXR1 PE=1 SV=2	2	62.7	1.614	1.291	1	0.995	1.221
Q9H6U6	Breast carcinoma-amplified sequence 3 OS=Homo sapiens GN=BCAS3 PE=1 SV=3	20	101.2	0.999	0.996	0.987	0.895	0.866
Q9H6T3	RNA polymerase II-associated protein 3 OS=Homo sapiens GN=RPAP3 PE=1 SV=2	2	75.7	1.219	1.189	1.165	1.164	1.464
Q9H6S0	Probable ATP-dependent RNA helicase YTHDC2 OS=Homo sapiens GN=YTHDC2 PE=1 SV=2	2	160.1	0.748	0.922	0.933	0.958	0.802
Q9H6R3	Acyl-CoA synthetase short-chain family member 3, mitochondrial OS=Homo sapiens GN=ACSS3 PE=1 SV=1	13	74.7	0.975	0.906	0.948	0.79	0.904
Q9H6L5	Reticulophagy receptor FAM134B OS=Homo sapiens GN=FAM134B PE=1 SV=1	4	54.6	0.99	0.994	0.855	0.651	0.684
Q9H6K5	Proline-rich protein 36 OS=Homo sapiens GN=PRR36 PE=1 SV=2	35	132.7	1.164	0.873	0.919	0.829	0.719
Q9H6K4	Optic atrophy 3 protein OS=Homo sapiens GN=OPA3 PE=1 SV=1	8	20	0.856	1.018	0.856	0.735	0.682
Q9H598	Vesicular inhibitory amino acid transporter OS=Homo sapiens GN=SLC32A1 PE=2 SV=2	18	57.4	0.819	1.144	0.889	0.95	0.852
Q9H553	Alpha-1,3/1,6-mannosyltransferase ALG2 OS=Homo sapiens GN=ALG2 PE=1 SV=1	2	47.1	1.244	1.067	1.216	1.032	1.26
Q9H4X1	Regulator of cell cycle RGCC OS=Homo sapiens GN=RGCC PE=1 SV=1	2	14.6	1.148	0.93	1.102	1.498	1.847
Q9H4G0-4	Isoform 4 of Band 4.1-like protein 1 OS=Homo sapiens GN=EPB41L1	189	78.8	0.994	0.94	1.146	1.321	1.191
Q9H4G0-2	Isoform 2 of Band 4.1-like protein 1 OS=Homo sapiens GN=EPB41L1	198	87.6	0.985	1.146	1.166	1.073	0.912
Q9H4F8-2	Isoform 2 of SPARC-related modular calcium-binding protein 1 OS=Homo sapiens GN=SMOC1	12	48.2	1.102	1.303	1.421	1.901	1.585
Q9H4D0	Calsyntenin-2 OS=Homo sapiens GN=CLSTN2 PE=1 SV=2	4	106.9	0.83	0.881	1.025	1.057	0.923
Q9H4B0	Probable tRNA N6-adenosine threonylcarbamoyltransferase, mitochondrial OS=Homo sapiens GN=OSGEPL1 PE=2 SV=2	2	45.1	1.166	1.336	1.936	1.303	1.408
Q9H4A6	Golgi phosphoprotein 3 OS=Homo sapiens GN=GOLPH3 PE=1 SV=1	4	33.8	0.859	1.098	0.887	0.937	1.068
Q9H4A3-7	Isoform 6 of Serine/threonine-protein kinase WNK1 OS=Homo sapiens GN=WNK1	54	299.5	1.052	0.976	1.028	0.972	1.126
Q9H492-2	Isoform 2 of Microtubule-associated proteins 1A/1B light chain 3A OS=Homo sapiens GN=MAP1LC3A	23	14.5	1.203	1.091	1.29	1.092	1.202
Q9H490	Phosphatidylinositol glycan anchor biosynthesis class U protein OS=Homo sapiens GN=PIGU PE=1 SV=3	2	50	0.772	0.87	0.743	0.677	0.723
Q9H479	Fructosamine-3-kinase OS=Homo sapiens GN=FN3K PE=1 SV=1	40	35.1	0.973	1.004	0.999	1.113	1.06
Q9H477	Ribokinase OS=Homo sapiens GN=RBKS PE=1 SV=1	3	34.1	0.764	0.767	0.774	0.839	0.764
Q9H469	F-box/LRR-repeat protein 15 OS=Homo sapiens GN=FBXL15 PE=1 SV=2	2	33	1.057	0.995	1.085	0.975	1.032
Q9H467	CUE domain-containing protein 2 OS=Homo sapiens GN=CUEDC2 PE=1 SV=1	4	32	1.165	1.172	1.197	1.54	1.899
Q9H444	Charged multivesicular body protein 4b OS=Homo sapiens GN=CHMP4B PE=1 SV=1	37	24.9	1.083	1.022	1.02	0.953	0.985
Q9H400	Lck-interacting transmembrane adapter 1 OS=Homo sapiens GN=LIME1 PE=1 SV=1	2	31.3
Q9H3Z4	DnaJ homolog subfamily C member 5 OS=Homo sapiens GN=DNAJC5 PE=1 SV=1	72	22.1	0.877	1.061	0.817	0.759	0.59
Q9H3U1	Protein unc-45 homolog A OS=Homo sapiens GN=UNC45A PE=1 SV=1	4	103	0.388	0.448	0.443	0.464	0.358
Q9H3S7	Tyrosine-protein phosphatase non-receptor type 23 OS=Homo sapiens GN=PTPN23 PE=1 SV=1	35	178.9	0.904	0.88	0.852	0.749	0.724
Q9H3S4	Thiamin pyrophosphokinase 1 OS=Homo sapiens GN=TPK1 PE=1 SV=1	3	27.2	0.908	0.897	0.936	0.992	0.968
Q9H3S1	Semaphorin-4A OS=Homo sapiens GN=SEMA4A PE=1 SV=2	6	83.5	1.18	1.037	1.059	1.108	1.1
Q9H3P7	Golgi resident protein GCP60 OS=Homo sapiens GN=ACBD3 PE=1 SV=4	8	60.6	0.912	1.053	0.921	0.899	0.911
Q9H3N1	Thioredoxin-related transmembrane protein 1 OS=Homo sapiens GN=TMX1 PE=1 SV=1	12	31.8	0.972	1.028	0.909	1.024	0.995
Q9H3K6	BolA-like protein 2 OS=Homo sapiens GN=BOLA2 PE=1 SV=1	3	10.1	1.02	0.967	1.044	1.127	1.244
Q9H3K3	My020 protein OS=Homo sapiens PE=2 SV=1	2	25.4	0.982	1.07	0.998	0.895	0.914
Q9H3H9	Transcription elongation factor A protein-like 2 OS=Homo sapiens GN=TCEAL2 PE=2 SV=1	4	25.8	1.269	1.267	1.278	1.078	1.143
Q9H3H3-2	Isoform 2 of UPF0696 protein C11orf68 OS=Homo sapiens GN=C11orf68	13	31.4	1.09	1.102	1.061	1.009	1.05
Q9H3F6	BTB/POZ domain-containing adapter for CUL3-mediated RhoA degradation protein 3 OS=Homo sapiens GN=KCTD10 PE=1 SV=1	2	35.4
Q9H330	Transmembrane protein 245 OS=Homo sapiens GN=TMEM245 PE=1 SV=2	14	100.9	0.803	0.958	1.023	1.147	0.723
Q9H313-3	Isoform 3 of Protein tweety homolog 1 OS=Homo sapiens GN=TTYH1	12	49.7	0.914	0.889	0.827	0.816	0.751
Q9H305	Cell death-inducing p53-target protein 1 OS=Homo sapiens GN=CDIP1 PE=1 SV=1	6	21.9	0.856	0.944	1.062	1.339	0.903
Q9H300	Presenilins-associated rhomboid-like protein, mitochondrial OS=Homo sapiens GN=PARL PE=1 SV=2	2	42.2
Q9H2X9	Solute carrier family 12 member 5 OS=Homo sapiens GN=SLC12A5 PE=1 SV=3	85	126.1	0.765	0.942	0.755	0.778	0.698
Q9H2X0	Chordin OS=Homo sapiens GN=CHRD PE=1 SV=2	4	102	1.066	1.026	1.083	1.016	1.03
Q9H2W6	39S ribosomal protein L46, mitochondrial OS=Homo sapiens GN=MRPL46 PE=1 SV=1	10	31.7	0.701	0.89	0.836	0.719	0.674
Q9H2U2-2	Isoform 2 of Inorganic pyrophosphatase 2, mitochondrial OS=Homo sapiens GN=PPA2	39	39.6	0.89	0.998	0.952	1.035	1.069
Q9H2U1	ATP-dependent RNA helicase DHX36 OS=Homo sapiens GN=DHX36 PE=1 SV=2	10	114.7	0.883	0.94	0.89	0.845	0.819
Q9H2M9	Rab3 GTPase-activating protein non-catalytic subunit OS=Homo sapiens GN=RAB3GAP2 PE=1 SV=1	56	155.9	1.026	0.977	0.947	0.834	0.807
Q9H2K2	Tankyrase-2 OS=Homo sapiens GN=TNKS2 PE=1 SV=1	2	126.8	0.439	0.597	0.611	0.912	0.69
Q9H2J7	Sodium-dependent neutral amino acid transporter B(0)AT2 OS=Homo sapiens GN=SLC6A15 PE=1 SV=1	8	81.8	0.812	1.013	1.3	1.251	1.516
Q9H2J4	Phosducin-like protein 3 OS=Homo sapiens GN=PDCL3 PE=1 SV=1	6	27.6	0.886	0.971	0.876	1.039	1.105
Q9H2G2-2	Isoform 2 of STE20-like serine/threonine-protein kinase OS=Homo sapiens GN=SLK	66	138.9	0.904	0.826	0.888	0.807	0.728
Q9H269	Vacuolar protein sorting-associated protein 16 homolog OS=Homo sapiens GN=VPS16 PE=1 SV=2	17	94.6	0.846	0.899	0.865	0.871	0.849
Q9H228	Sphingosine 1-phosphate receptor 5 OS=Homo sapiens GN=S1PR5 PE=2 SV=1	12	41.7	0.964	0.93	1.042	1.2	1.311
Q9H1V8	Sodium-dependent neutral amino acid transporter SLC6A17 OS=Homo sapiens GN=SLC6A17 PE=1 SV=3	63	80.9	0.93	1.084	0.911	0.895	0.827
Q9H1U4	Multiple epidermal growth factor-like domains protein 9 OS=Homo sapiens GN=MEGF9 PE=2 SV=3	11	62.9	0.912	1.077	1.044	1.283	0.971
Q9H1K1	Iron-sulfur cluster assembly enzyme ISCU, mitochondrial OS=Homo sapiens GN=ISCU PE=1 SV=2	28	18	0.934	0.974	0.905	0.957	0.945
Q9H1J1	Regulator of nonsense transcripts 3A OS=Homo sapiens GN=UPF3A PE=1 SV=1	2	54.7	1.082	1.001	0.93	1.072	1.087
Q9H1E5	Thioredoxin-related transmembrane protein 4 OS=Homo sapiens GN=TMX4 PE=1 SV=1	31	38.9	0.817	0.986	0.838	0.797	0.846
Q9H1E3	Nuclear ubiquitous casein and cyclin-dependent kinase substrate 1 OS=Homo sapiens GN=NUCKS1 PE=1 SV=1	86	27.3	0.95	1.021	1.15	1.177	1.071
Q9H1C7	Cysteine-rich and transmembrane domain-containing protein 1 OS=Homo sapiens GN=CYSTM1 PE=1 SV=1	4	10.6	0.625	0.702	0.625	0.769	0.683
Q9H1C4	Protein unc-93 homolog B1 OS=Homo sapiens GN=UNC93B1 PE=1 SV=2	4	66.6	1.197	1.168	1.192	1.31	1.08
Q9H1B7	Interferon regulatory factor 2-binding protein-like OS=Homo sapiens GN=IRF2BPL PE=1 SV=1	2	82.6	0.938	0.943	0.968	0.972	0.908
Q9H1A6	RPB11a protein OS=Homo sapiens GN=POLR2J1 PE=4 SV=1	1	14.1
Q9H1A4	Anaphase-promoting complex subunit 1 OS=Homo sapiens GN=ANAPC1 PE=1 SV=1	2	216.4	1.1	0.991	1.1	2.014	0.799
Q9H159	Cadherin-19 OS=Homo sapiens GN=CDH19 PE=2 SV=1	2	86.9	1.4	1.183	1.295	1.166	1.301
Q9H115	Beta-soluble NSF attachment protein OS=Homo sapiens GN=NAPB PE=1 SV=2	195	33.5	0.89	0.979	0.949	0.876	0.817
Q9H0X4	Protein FAM234A OS=Homo sapiens GN=FAM234A PE=1 SV=1	8	59.6	1.066	1.134	1.055	1.107	1.043
Q9H0U6	39S ribosomal protein L18, mitochondrial OS=Homo sapiens GN=MRPL18 PE=1 SV=1	2	20.6	1.241	1.24	1.156	0.893	1.005
Q9H0U4	Ras-related protein Rab-1B OS=Homo sapiens GN=RAB1B PE=1 SV=1	208	22.2	1.127	1.112	1.072	0.933	0.956
Q9H0R8-2	Isoform 2 of Gamma-aminobutyric acid receptor-associated protein-like 1 OS=Homo sapiens GN=GABARAPL1	12	17	1.153	1.244	1.147	0.967	1.033
Q9H0R4	Haloacid dehalogenase-like hydrolase domain-containing protein 2 OS=Homo sapiens GN=HDHD2 PE=1 SV=1	26	28.5	0.903	0.951	0.966	1.06	1.099
Q9H0Q0	Protein FAM49A OS=Homo sapiens GN=FAM49A PE=2 SV=1	23	37.3	0.81	0.744	0.824	0.749	0.697
Q9H0P0	Cytosolic 5'-nucleotidase 3A OS=Homo sapiens GN=NT5C3A PE=1 SV=3	5	37.9	1.091	1.067	0.989	0.842	0.955
Q9H0L4	Cleavage stimulation factor subunit 2 tau variant OS=Homo sapiens GN=CSTF2T PE=1 SV=1	4	64.4
Q9H0F7	ADP-ribosylation factor-like protein 6 OS=Homo sapiens GN=ARL6 PE=1 SV=1	4	21.1	0.705	0.739	0.689	0.648	0.605
Q9H0E3	Histone deacetylase complex subunit SAP130 OS=Homo sapiens GN=SAP130 PE=1 SV=1	1	110.3	0.814	0.858	1.688	0.988	0.982
Q9H0C8	Integrin-linked kinase-associated serine/threonine phosphatase 2C OS=Homo sapiens GN=ILKAP PE=1 SV=1	2	42.9
Q9H0B6	Kinesin light chain 2 OS=Homo sapiens GN=KLC2 PE=1 SV=1	52	68.9	1.046	1.002	0.936	0.893	0.908
Q9H0A0	RNA cytidine acetyltransferase OS=Homo sapiens GN=NAT10 PE=1 SV=2	1	115.7	1.314	1.215	1.071	1.066	1.175
Q9H098-2	Isoform 2 of Protein FAM107B OS=Homo sapiens GN=FAM107B	12	34.7	1.302	1.194	1.262	1.214	1.753
Q9H074	Polyadenylate-binding protein-interacting protein 1 OS=Homo sapiens GN=PAIP1 PE=1 SV=1	10	53.5	0.975	1	0.949	0.897	0.965
Q9H061	Transmembrane protein 126A OS=Homo sapiens GN=TMEM126A PE=1 SV=1	14	21.5	0.813	0.958	0.847	0.817	0.779
Q9H008	Phospholysine phosphohistidine inorganic pyrophosphate phosphatase OS=Homo sapiens GN=LHPP PE=1 SV=2	28	29.1	0.99	1.046	1.012	1.49	1.44
Q9GZZ9	Ubiquitin-like modifier-activating enzyme 5 OS=Homo sapiens GN=UBA5 PE=1 SV=1	14	44.8	0.963	0.927	0.975	0.929	0.869
Q9GZZ1	N-alpha-acetyltransferase 50 OS=Homo sapiens GN=NAA50 PE=1 SV=1	4	19.4	1.696	1.406	1.642	1.097	1.451
Q9GZY8-2	Isoform 2 of Mitochondrial fission factor OS=Homo sapiens GN=MFF	28	33	0.902	0.97	0.887	0.934	0.86
Q9GZV7	Hyaluronan and proteoglycan link protein 2 OS=Homo sapiens GN=HAPLN2 PE=2 SV=1	109	37.8	1.24	1.101	1.363	1.829	2.113
Q9GZU8	Protein FAM192A OS=Homo sapiens GN=FAM192A PE=1 SV=1	2	28.9	0.572	0.641	0.488	0.561	0.547
Q9GZT9	Egl nine homolog 1 OS=Homo sapiens GN=EGLN1 PE=1 SV=1	14	46	0.989	0.939	1.009	0.95	0.907
Q9GZT8	NIF3-like protein 1 OS=Homo sapiens GN=NIF3L1 PE=1 SV=2	33	41.9	0.987	1.009	1.051	1.116	1.17
Q9GZT4	Serine racemase OS=Homo sapiens GN=SRR PE=1 SV=1	12	36.5	1.063	0.962	1.085	1.081	1.033
Q9GZT3	SRA stem-loop-interacting RNA-binding protein, mitochondrial OS=Homo sapiens GN=SLIRP PE=1 SV=1	13	12.3	0.862	0.989	0.745	0.548	0.595
Q9GZS3	WD repeat-containing protein 61 OS=Homo sapiens GN=WDR61 PE=1 SV=1	4	33.6	0.828	0.896	0.824	0.835	0.793
Q9GZR5	Elongation of very long chain fatty acids protein 4 OS=Homo sapiens GN=ELOVL4 PE=1 SV=1	2	36.8	0.912	1.542	1.251	1.022	0.989
Q9GZQ3	COMM domain-containing protein 5 OS=Homo sapiens GN=COMMD5 PE=1 SV=1	2	24.7	1.026	1.144	1.119	1.248	1.315
Q9GZP4	PITH domain-containing protein 1 OS=Homo sapiens GN=PITHD1 PE=1 SV=1	38	24.2	0.942	1.029	0.997	1.149	0.984
Q9GZN8-2	Isoform 2 of UPF0687 protein C20orf27 OS=Homo sapiens GN=C20orf27	4	21.6	0.809	0.794	0.735	0.832	0.745
Q9GZN7	Protein rogdi homolog OS=Homo sapiens GN=ROGDI PE=1 SV=1	19	32.2	0.827	0.862	0.827	0.716	0.644
Q9GZM8-2	Isoform 2 of Nuclear distribution protein nudE-like 1 OS=Homo sapiens GN=NDEL1	25	40.6	1.305	1.129	1.114	0.909	0.961
Q9GZM7	Tubulointerstitial nephritis antigen-like OS=Homo sapiens GN=TINAGL1 PE=1 SV=1	11	52.4	1.086	0.984	0.971	1.066	0.963
Q9C0I1	Myotubularin-related protein 12 OS=Homo sapiens GN=MTMR12 PE=1 SV=2	15	86.1	0.843	0.776	0.848	0.799	0.776
Q9C0H6-2	Isoform 2 of Kelch-like protein 4 OS=Homo sapiens GN=KLHL4	2	80.8	1.192	1.177	1.214	1.017	1.261
Q9C0H5-2	Isoform 2 of Rho GTPase-activating protein 39 OS=Homo sapiens GN=ARHGAP39	12	125	1.076	1.177	1.01	0.903	0.872
Q9C0H2-4	Isoform 4 of Protein tweety homolog 3 OS=Homo sapiens GN=TTYH3	13	57.9	0.922	1.087	0.942	0.909	0.802
Q9C0G6	Dynein heavy chain 6, axonemal OS=Homo sapiens GN=DNAH6 PE=2 SV=3	3	475.7	0.24	0.301	0.425	0.279	0.188
Q9C0E8-4	Isoform 4 of Protein lunapark OS=Homo sapiens GN=LNP	22	50.8	0.767	0.881	0.839	0.862	0.786
Q9C0D3	Protein zyg-11 homolog B OS=Homo sapiens GN=ZYG11B PE=1 SV=2	8	83.9	1.178	1.065	1.3	1.374	1.321
Q9C0D0	Phosphatase and actin regulator 1 OS=Homo sapiens GN=PHACTR1 PE=1 SV=3	16	66.3	0.955	0.89	0.841	0.787	0.643
Q9C0C9	(E3-independent) E2 ubiquitin-conjugating enzyme OS=Homo sapiens GN=UBE2O PE=1 SV=3	65	141.2	1.136	0.998	1.105	0.977	1.113
Q9C0C2	182 kDa tankyrase-1-binding protein OS=Homo sapiens GN=TNKS1BP1 PE=1 SV=4	20	181.7	1.102	1.032	1.031	0.931	1.116
Q9C0B7	Transport and Golgi organization protein 6 homolog OS=Homo sapiens GN=TANGO6 PE=1 SV=2	1	120.7	0.747	0.889	0.853	0.716	0.721
Q9C0B5	Palmitoyltransferase ZDHHC5 OS=Homo sapiens GN=ZDHHC5 PE=1 SV=2	14	77.5	1.021	1.053	0.976	0.825	0.965
Q9C0B0	RING finger protein unkempt homolog OS=Homo sapiens GN=UNK PE=1 SV=2	4	88	0.835	0.83	0.808	0.762	0.74
Q9C040-2	Isoform 2 of Tripartite motif-containing protein 2 OS=Homo sapiens GN=TRIM2	80	84.5	0.93	0.954	1.014	1.002	1.026
Q9C026-5	Isoform 5 of E3 ubiquitin-protein ligase TRIM9 OS=Homo sapiens GN=TRIM9	8	61.3	0.843	0.898	0.876	0.845	0.767
Q9BZZ5	Apoptosis inhibitor 5 OS=Homo sapiens GN=API5 PE=1 SV=3	20	59	0.878	1.025	0.918	0.943	0.955
Q9BZV1	UBX domain-containing protein 6 OS=Homo sapiens GN=UBXN6 PE=1 SV=1	45	49.7	0.924	0.94	0.871	0.788	0.691
Q9BZL4	Protein phosphatase 1 regulatory subunit 12C OS=Homo sapiens GN=PPP1R12C PE=1 SV=1	8	84.8	1.012	0.9	0.98	1.031	0.804
Q9BZK7	F-box-like/WD repeat-containing protein TBL1XR1 OS=Homo sapiens GN=TBL1XR1 PE=1 SV=1	2	55.6
Q9BZI7	Regulator of nonsense transcripts 3B OS=Homo sapiens GN=UPF3B PE=1 SV=1	10	57.7	1.005	0.913	1.22	1.178	1.082
Q9BZH6	WD repeat-containing protein 11 OS=Homo sapiens GN=WDR11 PE=1 SV=1	10	136.6	0.804	0.935	0.814	0.98	0.819
Q9BZG9-2	Isoform 2 of Ly-6/neurotoxin-like protein 1 OS=Homo sapiens GN=LYNX1	12	12.6	1.168	1.319	1.847	1.316	1.5
Q9BZF3-5	Isoform 5 of Oxysterol-binding protein-related protein 6 OS=Homo sapiens GN=OSBPL6	4	108.9	0.844	0.814	0.874	0.847	0.582
Q9BZE9-2	Isoform 2 of Tether containing UBX domain for GLUT4 OS=Homo sapiens GN=ASPSCR1	12	69.9	0.983	1.146	1.049	1.071	0.961
Q9BZC1	CUGBP Elav-like family member 4 OS=Homo sapiens GN=CELF4 PE=1 SV=1	6	51.9	0.824	0.87	0.937	0.664	0.56
Q9BZA7	Protocadherin-11 X-linked OS=Homo sapiens GN=PCDH11X PE=2 SV=1	2	147.5	0.392	0.516	0.37	0.356	0.344
Q9BZ95	Histone-lysine N-methyltransferase NSD3 OS=Homo sapiens GN=WHSC1L1 PE=1 SV=1	2	161.5	0.885	1.011	0.825	0.863	0.773
Q9BZ72	Membrane-associated phosphatidylinositol transfer protein 2 OS=Homo sapiens GN=PITPNM2 PE=1 SV=1	2	148.8	0.73	0.918	0.725	0.657	0.478
Q9BZ23	Pantothenate kinase 2, mitochondrial OS=Homo sapiens GN=PANK2 PE=1 SV=3	11	62.6	0.925	0.845	0.855	0.719	0.752
Q9BYV8	Centrosomal protein of 41 kDa OS=Homo sapiens GN=CEP41 PE=1 SV=1	26	41.3	0.983	0.978	0.974	0.975	0.993
Q9BYT9	Anoctamin-3 OS=Homo sapiens GN=ANO3 PE=1 SV=2	1	114.6	0.801	0.674	0.835	0.697	0.688
Q9BYP7	Serine/threonine-protein kinase WNK3 OS=Homo sapiens GN=WNK3 PE=1 SV=3	14	198.3	1.107	0.965	0.94	0.902	0.922
Q9BYN8	28S ribosomal protein S26, mitochondrial OS=Homo sapiens GN=MRPS26 PE=1 SV=1	4	24.2	0.655	0.839	0.697	0.599	0.575
Q9BYN0	Sulfiredoxin-1 OS=Homo sapiens GN=SRXN1 PE=1 SV=2	2	14.3	1.168	1.044	1.129	1.096	1.058
Q9BYM8	RanBP-type and C3HC4-type zinc finger-containing protein 1 OS=Homo sapiens GN=RBCK1 PE=1 SV=2	2	57.5	0.793	0.867	0.841	0.97	0.751
Q9BYK8	Helicase with zinc finger domain 2 OS=Homo sapiens GN=HELZ2 PE=1 SV=6	1	294.5
Q9BYH1	Seizure 6-like protein OS=Homo sapiens GN=SEZ6L PE=1 SV=1	12	111.7	1.089	1.104	1.051	0.982	1.023
Q9BYD6	39S ribosomal protein L1, mitochondrial OS=Homo sapiens GN=MRPL1 PE=1 SV=2	12	36.9	0.771	0.969	0.841	0.703	0.752
Q9BYD2	39S ribosomal protein L9, mitochondrial OS=Homo sapiens GN=MRPL9 PE=1 SV=2	9	30.2	0.786	0.957	0.852	0.954	0.929
Q9BYD1	39S ribosomal protein L13, mitochondrial OS=Homo sapiens GN=MRPL13 PE=1 SV=1	2	20.7	0.87	1.158	0.926	0.778	0.94
Q9BYC9	39S ribosomal protein L20, mitochondrial OS=Homo sapiens GN=MRPL20 PE=1 SV=1	2	17.4	0.79	1.017	0.855	0.906	0.902
Q9BYB4	Guanine nucleotide-binding protein subunit beta-like protein 1 OS=Homo sapiens GN=GNB1L PE=1 SV=2	2	35.6
Q9BYB0	SH3 and multiple ankyrin repeat domains protein 3 OS=Homo sapiens GN=SHANK3 PE=1 SV=3	18	184.6	1.193	1.19	1.119	0.87	0.852
Q9BY89	Uncharacterized protein KIAA1671 OS=Homo sapiens GN=KIAA1671 PE=1 SV=2	4	196.6	1.074	0.882	1.026	1.081	0.907
Q9BY67-5	Isoform 5 of Cell adhesion molecule 1 OS=Homo sapiens GN=CADM1	63	45.6	1.024	0.968	1.064	1.031	0.932
Q9BY50	Signal peptidase complex catalytic subunit SEC11C OS=Homo sapiens GN=SEC11C PE=1 SV=3	4	21.5	0.748	0.786	0.719	0.701	0.641
Q9BY44	Eukaryotic translation initiation factor 2A OS=Homo sapiens GN=EIF2A PE=1 SV=3	8	64.9	0.929	0.933	0.926	0.774	0.824
Q9BXX0	EMILIN-2 OS=Homo sapiens GN=EMILIN2 PE=1 SV=3	2	115.6	0.857	1.06	1.029	1.018	0.955
Q9BXW6	Oxysterol-binding protein-related protein 1 OS=Homo sapiens GN=OSBPL1A PE=1 SV=2	26	108.4	0.986	0.918	0.984	1.051	1.149
Q9BXV9	Uncharacterized protein C14orf142 OS=Homo sapiens GN=C14orf142 PE=1 SV=2	5	10.9	0.83	0.897	0.969	1.115	1.152
Q9BXP5	Serrate RNA effector molecule homolog OS=Homo sapiens GN=SRRT PE=1 SV=1	14	100.6	0.77	0.879	0.877	0.76	0.688
Q9BXP2	Solute carrier family 12 member 9 OS=Homo sapiens GN=SLC12A9 PE=1 SV=1	6	96	1.062	1.04	0.952	1.07	0.981
Q9BXM9	FSD1-like protein OS=Homo sapiens GN=FSD1L PE=1 SV=2	16	59.5	0.875	0.859	0.851	0.844	0.737
Q9BXI3	Cytosolic 5'-nucleotidase 1A OS=Homo sapiens GN=NT5C1A PE=1 SV=1	2	41	0.936	0.901	0.824	0.822	0.779
Q9BX95	Sphingosine-1-phosphate phosphatase 1 OS=Homo sapiens GN=SGPP1 PE=1 SV=2	8	49.1	0.891	0.969	0.965	0.963	0.878
Q9BX70	BTB/POZ domain-containing protein 2 OS=Homo sapiens GN=BTBD2 PE=1 SV=1	2	55.9	0.936	0.986	0.951	1.109	0.904
Q9BX68	Histidine triad nucleotide-binding protein 2, mitochondrial OS=Homo sapiens GN=HINT2 PE=1 SV=1	24	17.2	1.001	0.989	0.966	0.965	0.988
Q9BX67	Junctional adhesion molecule C OS=Homo sapiens GN=JAM3 PE=1 SV=1	31	35	1.425	1.383	1.25	1.445	1.793
Q9BX66-12	Isoform 12 of Sorbin and SH3 domain-containing protein 1 OS=Homo sapiens GN=SORBS1	69	143.7	1.211	2.804	2.39	1.328	1.542
Q9BX66	Sorbin and SH3 domain-containing protein 1 OS=Homo sapiens GN=SORBS1 PE=1 SV=3	69	142.4	0.943	0.941	0.957	0.983	0.971
Q9BX40	Protein LSM14 homolog B OS=Homo sapiens GN=LSM14B PE=1 SV=1	3	42	2	1.656	1.308	0.91	1.418
Q9BWW4	Single-stranded DNA-binding protein 3 OS=Homo sapiens GN=SSBP3 PE=1 SV=1	2	40.4
Q9BWU0	Kanadaptin OS=Homo sapiens GN=SLC4A1AP PE=1 SV=1	2	88.8	1.079	0.895	1.015	0.772	0.857
Q9BWQ8	Protein lifeguard 2 OS=Homo sapiens GN=FAIM2 PE=1 SV=1	29	35.1	1.368	1.249	1.265	0.996	1.009
Q9BWL3	Uncharacterized protein C1orf43 OS=Homo sapiens GN=C1orf43 PE=2 SV=1	4	28.8	0.829	0.869	1.016	0.902	0.964
Q9BWJ5	Splicing factor 3B subunit 5 OS=Homo sapiens GN=SF3B5 PE=1 SV=1	6	10.1	0.9	1	0.889	0.963	0.819
Q9BWH6	RNA polymerase II-associated protein 1 OS=Homo sapiens GN=RPAP1 PE=1 SV=3	3	152.7	1.068	0.281	1.234	1.107	0.69
Q9BWH2	FUN14 domain-containing protein 2 OS=Homo sapiens GN=FUNDC2 PE=1 SV=2	12	20.7	1.093	1.416	1.131	1.03	1.205
Q9BW92	Threonine--tRNA ligase, mitochondrial OS=Homo sapiens GN=TARS2 PE=1 SV=1	4	81	0.858	1.001	1.059	0.984	0.906
Q9BW85	Coiled-coil domain-containing protein 94 OS=Homo sapiens GN=CCDC94 PE=1 SV=1	4	37.1	0.969	1.035	1.141	1.164	1.344
Q9BW83	Intraflagellar transport protein 27 homolog OS=Homo sapiens GN=IFT27 PE=1 SV=1	4	20.5	0.859	0.893	0.814	1.023	0.886
Q9BW61	DET1- and DDB1-associated protein 1 OS=Homo sapiens GN=DDA1 PE=1 SV=1	2	11.8
Q9BW60	Elongation of very long chain fatty acids protein 1 OS=Homo sapiens GN=ELOVL1 PE=1 SV=1	4	32.6	1.212	1.308	1.018	1.151	1.567
Q9BW34	EEF1D protein (Fragment) OS=Homo sapiens GN=EEF1D PE=2 SV=2	43	60.8	1.347	1.409	1.657	1.368	1.975
Q9BW30	Tubulin polymerization-promoting protein family member 3 OS=Homo sapiens GN=TPPP3 PE=1 SV=1	65	19	1.357	1.116	1.29	1.528	1.989
Q9BW27	Nuclear pore complex protein Nup85 OS=Homo sapiens GN=NUP85 PE=1 SV=1	2	75
Q9BW19	Kinesin-like protein KIFC1 OS=Homo sapiens GN=KIFC1 PE=1 SV=2	1	73.7	0.967	1.373	0.803	0.778	0.688
Q9BVL4	Selenoprotein O OS=Homo sapiens GN=SELO PE=2 SV=3	2	73.4
Q9BVJ6	U3 small nucleolar RNA-associated protein 14 homolog A OS=Homo sapiens GN=UTP14A PE=1 SV=1	2	87.9	0.806	0.816	0.888	0.64	0.442
Q9BVG4	Protein PBDC1 OS=Homo sapiens GN=PBDC1 PE=1 SV=1	8	26	0.7	0.829	0.76	0.836	0.841
Q9BVA1	Tubulin beta-2B chain OS=Homo sapiens GN=TUBB2B PE=1 SV=1	1381	49.9	0.897	0.793	0.859	0.773	0.756
Q9BVA0	Katanin p80 WD40 repeat-containing subunit B1 OS=Homo sapiens GN=KATNB1 PE=1 SV=1	16	72.3	0.936	0.891	0.946	0.891	0.915
Q9BV79	Trans-2-enoyl-CoA reductase, mitochondrial OS=Homo sapiens GN=MECR PE=1 SV=2	26	40.4	1.228	1.269	1.196	1.093	1.142
Q9BV44	THUMP domain-containing protein 3 OS=Homo sapiens GN=THUMPD3 PE=1 SV=1	4	57	1.04	0.949	0.923	0.866	0.81
Q9BV35-3	Isoform 3 of Calcium-binding mitochondrial carrier protein SCaMC-3 OS=Homo sapiens GN=SLC25A23	14	54	0.945	1.022	0.894	0.822	0.754
Q9BV20	Methylthioribose-1-phosphate isomerase OS=Homo sapiens GN=MRI1 PE=1 SV=1	8	39.1	0.995	0.919	1.005	1.125	1.236
Q9BV19	Uncharacterized protein C1orf50 OS=Homo sapiens GN=C1orf50 PE=1 SV=2	2	21.9	0.588	0.715	0.69	0.746	0.687
Q9BUW7	UPF0184 protein C9orf16 OS=Homo sapiens GN=C9orf16 PE=1 SV=1	2	9	1.164	0.931	0.943	1.022	0.942
Q9BUU9	Tubulin beta chain (Fragment) OS=Homo sapiens GN=TUBB PE=2 SV=1	973	38.3	0.899	0.84	0.829	0.78	0.692
Q9BUT9	MAPK regulated corepressor interacting protein 2 OS=Homo sapiens GN=MCRIP2 PE=1 SV=2	2	17.8
Q9BUR5	MICOS complex subunit MIC26 OS=Homo sapiens GN=APOO PE=1 SV=1	12	22.3	0.8	1.037	1.1	1.31	1.253
Q9BUP3-3	Isoform 3 of Oxidoreductase HTATIP2 OS=Homo sapiens GN=HTATIP2	6	30.1	1.15	1.021	0.992	0.878	1.132
Q9BUP0	EF-hand domain-containing protein D1 OS=Homo sapiens GN=EFHD1 PE=1 SV=1	50	26.9	1.173	1.09	1.363	1.877	2.225
Q9BUN5	Coiled-coil domain-containing protein 28B OS=Homo sapiens GN=CCDC28B PE=1 SV=2	4	22	0.831	0.746	0.77	0.877	0.913
Q9BUN1	Protein MENT OS=Homo sapiens GN=MENT PE=2 SV=1	2	36.7
Q9BUL8	Programmed cell death protein 10 OS=Homo sapiens GN=PDCD10 PE=1 SV=1	6	24.7	0.594	0.928	0.917	0.914	0.877
Q9BUK6	Protein misato homolog 1 OS=Homo sapiens GN=MSTO1 PE=1 SV=1	4	61.8	0.773	0.678	0.868	0.614	0.672
Q9BUK0-4	Isoform 4 of Coiled-coil-helix-coiled-coil-helix domain-containing protein 7 OS=Homo sapiens GN=CHCHD7	2	13	1.142	1.3	1.609	1.731	1.346
Q9BUH6	Protein PAXX OS=Homo sapiens GN=C9orf142 PE=1 SV=2	4	21.6	0.825	0.819	0.748	0.899	0.765
Q9BUF5	Tubulin beta-6 chain OS=Homo sapiens GN=TUBB6 PE=1 SV=1	626	49.8	1.09	1.048	0.93	0.969	0.992
Q9BUE6-2	Isoform 2 of Iron-sulfur cluster assembly 1 homolog, mitochondrial OS=Homo sapiens GN=ISCA1	3	19.3	0.955	0.896	0.835	0.71	0.955
Q9BU89	Deoxyhypusine hydroxylase OS=Homo sapiens GN=DOHH PE=1 SV=1	4	32.9	1.103	1.001	1.073	1.048	0.999
Q9BU61	NADH dehydrogenase [ubiquinone] 1 alpha subcomplex assembly factor 3 OS=Homo sapiens GN=NDUFAF3 PE=1 SV=1	12	20.3	1.069	0.958	0.957	1.003	0.898
Q9BU02	Thiamine-triphosphatase OS=Homo sapiens GN=THTPA PE=1 SV=3	6	25.6	0.976	1.036	1.202	1.621	1.424
Q9BTZ2	Dehydrogenase/reductase SDR family member 4 OS=Homo sapiens GN=DHRS4 PE=1 SV=3	2	29.5	0.945	0.972	0.816	0.805	0.847
Q9BTW9-4	Isoform 4 of Tubulin-specific chaperone D OS=Homo sapiens GN=TBCD	20	138.6	0.824	1.023	0.857	0.875	0.78
Q9BTV5	Fibronectin type III and SPRY domain-containing protein 1 OS=Homo sapiens GN=FSD1 PE=1 SV=1	26	55.8	0.851	0.936	0.927	0.87	0.83
Q9BTV4	Transmembrane protein 43 OS=Homo sapiens GN=TMEM43 PE=1 SV=1	6	44.8	0.956	1.033	1.03	1.284	1
Q9BTU6	Phosphatidylinositol 4-kinase type 2-alpha OS=Homo sapiens GN=PI4K2A PE=1 SV=1	14	54	0.891	1.034	0.972	1.041	0.968
Q9BTT0	Acidic leucine-rich nuclear phosphoprotein 32 family member E OS=Homo sapiens GN=ANP32E PE=1 SV=1	10	30.7	0.977	0.968	0.937	0.742	0.734
Q9BTL3	RNMT-activating mini protein OS=Homo sapiens GN=FAM103A1 PE=1 SV=1	2	14.4	0.814	0.932	0.83	0.666	0.647
Q9BTE6-3	Isoform 3 of Alanyl-tRNA editing protein Aarsd1 OS=Homo sapiens GN=AARSD1	11	65.7	0.951	0.996	0.947	0.895	0.793
Q9BTE1	Dynactin subunit 5 OS=Homo sapiens GN=DCTN5 PE=1 SV=1	10	20.1	1.225	1.146	1.115	1.012	1.167
Q9BTC0	Death-inducer obliterator 1 OS=Homo sapiens GN=DIDO1 PE=1 SV=5	2	243.7	1.185	1.159	1.167	1.046	1.109
Q9BT88	Synaptotagmin-11 OS=Homo sapiens GN=SYT11 PE=1 SV=2	10	48.3	0.957	0.98	1.009	1.049	1.024
Q9BT40	Inositol polyphosphate 5-phosphatase K OS=Homo sapiens GN=INPP5K PE=1 SV=3	6	51.1	0.85	0.905	0.896	0.845	0.789
Q9BT22	Chitobiosyldiphosphodolichol beta-mannosyltransferase OS=Homo sapiens GN=ALG1 PE=1 SV=2	6	52.5	0.826	0.839	0.887	0.677	0.644
Q9BSW7	Synaptotagmin-17 OS=Homo sapiens GN=SYT17 PE=1 SV=1	4	53.8	0.912	0.92	0.872	0.768	0.71
Q9BSU1	UPF0183 protein C16orf70 OS=Homo sapiens GN=C16orf70 PE=1 SV=1	6	47.5	0.789	0.859	0.982	1.145	0.807
Q9BST9	Rhotekin OS=Homo sapiens GN=RTKN PE=1 SV=2	2	62.6	1.398	1.141	1.003	0.95	1.204
Q9BSR8	Protein YIPF4 OS=Homo sapiens GN=YIPF4 PE=1 SV=1	2	27.1	1.12	1.104	1.012	0.859	1.082
Q9BSQ5-2	Isoform 2 of Cerebral cavernous malformations 2 protein OS=Homo sapiens GN=CCM2	2	51.4	0.93	0.96	0.995	1.015	0.944
Q9BSL1	Ubiquitin-associated domain-containing protein 1 OS=Homo sapiens GN=UBAC1 PE=1 SV=1	3	45.3	0.908	0.908	0.915	0.746	0.745
Q9BSJ8-2	Isoform 2 of Extended synaptotagmin-1 OS=Homo sapiens GN=ESYT1	64	123.9	0.967	0.996	0.947	0.865	0.846
Q9BSJ2-4	Isoform 3 of Gamma-tubulin complex component 2 OS=Homo sapiens GN=TUBGCP2	2	105.6	0.921	0.873	0.855	0.759	0.761
Q9BSH4	Translational activator of cytochrome c oxidase 1 OS=Homo sapiens GN=TACO1 PE=1 SV=1	2	32.5	0.946	0.861	0.917	0.743	0.734
Q9BSF4	Mitochondrial import inner membrane translocase subunit Tim29 OS=Homo sapiens GN=TIMM29 PE=1 SV=2	10	29.2	1.154	1.152	1.096	1.019	0.961
Q9BSF0	Small membrane A-kinase anchor protein OS=Homo sapiens GN=C2orf88 PE=1 SV=2	6	11	1.182	1.34	1.215	1.407	1.469
Q9BSA9	Endosomal/lysomomal potassium channel TMEM175 OS=Homo sapiens GN=TMEM175 PE=1 SV=1	3	55.6	1.162	1.522	1.667	2.174	1.779
Q9BS92	Protein NipSnap homolog 3B OS=Homo sapiens GN=NIPSNAP3B PE=2 SV=1	14	28.3	0.982	1.134	1.07	1.229	1.105
Q9BS40	Latexin OS=Homo sapiens GN=LXN PE=1 SV=2	1	25.7	1.506	1.189	0.952	0.745	1.116
Q9BS26	Endoplasmic reticulum resident protein 44 OS=Homo sapiens GN=ERP44 PE=1 SV=1	25	46.9	1.126	1.028	1.144	1.331	1.319
Q9BRZ2	E3 ubiquitin-protein ligase TRIM56 OS=Homo sapiens GN=TRIM56 PE=1 SV=3	4	81.4	0.977	0.842	0.908	0.901	0.957
Q9BRX8	Redox-regulatory protein FAM213A OS=Homo sapiens GN=FAM213A PE=1 SV=3	44	25.7	0.934	1.1	0.943	0.961	0.992
Q9BRV8-2	Isoform 2 of Suppressor of IKBKE 1 OS=Homo sapiens GN=SIKE1	4	24.2	0.965	1.4	1.118	1.102	1.193
Q9BRU2	Transcription elongation factor A protein-like 7 OS=Homo sapiens GN=TCEAL7 PE=2 SV=2	2	12.3	1.144	1.169	1.104	0.965	1.299
Q9BRT3	Migration and invasion enhancer 1 OS=Homo sapiens GN=MIEN1 PE=1 SV=1	19	12.4	0.933	0.885	0.921	0.995	0.927
Q9BRT2	Ubiquinol-cytochrome-c reductase complex assembly factor 2 OS=Homo sapiens GN=UQCC2 PE=1 SV=1	12	14.9	1.064	1.153	1.026	0.922	0.871
Q9BRS8	La-related protein 6 OS=Homo sapiens GN=LARP6 PE=1 SV=1	4	54.7	0.895	0.912	0.844	0.686	0.721
Q9BRR6	ADP-dependent glucokinase OS=Homo sapiens GN=ADPGK PE=1 SV=1	2	54.1	1.116	1.461	1.123	1.781	2.141
Q9BRP8	Partner of Y14 and mago OS=Homo sapiens GN=PYM1 PE=1 SV=1	12	22.6	0.913	1.049	0.975	0.856	0.935
Q9BRK5	45 kDa calcium-binding protein OS=Homo sapiens GN=SDF4 PE=1 SV=1	4	41.8	1.21	1.41	1.198	1.115	1.24
Q9BRF8	Serine/threonine-protein phosphatase CPPED1 OS=Homo sapiens GN=CPPED1 PE=1 SV=3	22	35.5	0.954	1.025	0.932	1.153	1.267
Q9BRA2	Thioredoxin domain-containing protein 17 OS=Homo sapiens GN=TXNDC17 PE=1 SV=1	2	13.9	0.973	0.816	0.817	1.107	1.013
Q9BR76	Coronin-1B OS=Homo sapiens GN=CORO1B PE=1 SV=1	7	54.2	0.938	0.922	1.153	1.558	1.605
Q9BR01	Sulfotransferase 4A1 OS=Homo sapiens GN=SULT4A1 PE=1 SV=2	20	33.1	0.702	0.821	0.801	0.888	0.857
Q9BQT9-2	Isoform 2 of Calsyntenin-3 OS=Homo sapiens GN=CLSTN3	6	107	0.746	0.862	0.785	0.648	0.687
Q9BQS8-4	Isoform 4 of FYVE and coiled-coil domain-containing protein 1 OS=Homo sapiens GN=FYCO1	2	168.8	1.116	1.106	1.151	1.089	1.22
Q9BQS7-3	Isoform 3 of Hephaestin OS=Homo sapiens GN=HEPH	2	136.6	0.991	0.925	0.92	1.124	0.941
Q9BQI9	Nuclear receptor-interacting protein 2 OS=Homo sapiens GN=NRIP2 PE=1 SV=3	4	31.3	0.989	1.009	0.976	0.931	1.345
Q9BQI7	PH and SEC7 domain-containing protein 2 OS=Homo sapiens GN=PSD2 PE=2 SV=3	12	84.6	0.882	0.846	0.951	0.971	0.968
Q9BQI5-2	Isoform 2 of SH3-containing GRB2-like protein 3-interacting protein 1 OS=Homo sapiens GN=SGIP1	96	89.7	0.91	1.001	0.878	0.805	0.753
Q9BQI0-2	Isoform 2 of Allograft inflammatory factor 1-like OS=Homo sapiens GN=AIF1L	20	20	1.592	1.3	1.427	1.216	1.878
Q9BQG2	Peroxisomal NADH pyrophosphatase NUDT12 OS=Homo sapiens GN=NUDT12 PE=1 SV=1	5	52	0.945	0.89	0.882	0.883	0.916
Q9BQG1	Synaptotagmin-3 OS=Homo sapiens GN=SYT3 PE=2 SV=1	10	63.3	1.233	1.272	1.168	1.039	1.079
Q9BQA1	Methylosome protein 50 OS=Homo sapiens GN=WDR77 PE=1 SV=1	4	36.7	0.961	1.082	0.958	1.062	0.998
Q9BQ95	Evolutionarily conserved signaling intermediate in Toll pathway, mitochondrial OS=Homo sapiens GN=ECSIT PE=1 SV=1	12	49.1	0.775	1.086	0.778	0.722	0.669
Q9BQ70	Transcription factor 25 OS=Homo sapiens GN=TCF25 PE=1 SV=1	9	76.6	0.857	0.913	0.842	0.785	0.688
Q9BQ69	O-acetyl-ADP-ribose deacetylase MACROD1 OS=Homo sapiens GN=MACROD1 PE=1 SV=2	20	35.5	1.115	1.071	1.228	1.115	1.037
Q9BQ24-2	Isoform 2 of Zinc finger FYVE domain-containing protein 21 OS=Homo sapiens GN=ZFYVE21	8	28.5	1.006	1.051	1.157	1.495	1.406
Q9BPY8-3	Isoform 3 of Homeodomain-only protein OS=Homo sapiens GN=HOPX	2	10.4
Q9BPY3	Protein FAM118B OS=Homo sapiens GN=FAM118B PE=1 SV=1	2	39.5	1.428	1.435	1.387	1.159	1.477
Q9BPW8	Protein NipSnap homolog 1 OS=Homo sapiens GN=NIPSNAP1 PE=1 SV=1	53	33.3	0.997	1.085	0.974	0.785	0.79
Q9BPU6	Dihydropyrimidinase-related protein 5 OS=Homo sapiens GN=DPYSL5 PE=1 SV=1	80	61.4	1.056	0.964	1.112	1.123	1.256
Q99963	Endophilin-A3 OS=Homo sapiens GN=SH3GL3 PE=1 SV=1	70	39.3	1.107	0.94	1.128	0.992	0.941
Q99962	Endophilin-A1 OS=Homo sapiens GN=SH3GL2 PE=1 SV=1	178	39.9	1.104	0.954	1.066	0.881	0.822
Q99961	Endophilin-A2 OS=Homo sapiens GN=SH3GL1 PE=1 SV=1	72	41.5	0.976	0.828	0.961	0.944	0.964
Q99959	Plakophilin-2 OS=Homo sapiens GN=PKP2 PE=1 SV=2	2	97.4
Q99952	Tyrosine-protein phosphatase non-receptor type 18 OS=Homo sapiens GN=PTPN18 PE=1 SV=2	2	50.5	0.01	0.537	0.529	0.534	0.01
Q99946	Proline-rich transmembrane protein 1 OS=Homo sapiens GN=PRRT1 PE=2 SV=2	2	31.4
Q99828-2	Isoform 2 of Calcium and integrin-binding protein 1 OS=Homo sapiens GN=CIB1	12	26	1.343	1.351	1.239	1.493	1.852
Q99816	Tumor susceptibility gene 101 protein OS=Homo sapiens GN=TSG101 PE=1 SV=2	31	43.9	0.986	0.971	0.921	0.95	0.894
Q99808-2	Isoform 2 of Equilibrative nucleoside transporter 1 OS=Homo sapiens GN=SLC29A1	2	58.9	0.834	1.194	1.046	1.297	0.985
Q99807	5-demethoxyubiquinone hydroxylase, mitochondrial OS=Homo sapiens GN=COQ7 PE=1 SV=3	6	24.3	0.938	0.983	0.909	0.927	0.773
Q99797	Mitochondrial intermediate peptidase OS=Homo sapiens GN=MIPEP PE=1 SV=2	2	80.6
Q99785	Putative uncharacterized protein (Fragment) OS=Homo sapiens PE=2 SV=1	4	32.4	1.043	0.891	0.727	0.944	1.12
Q99784	Noelin OS=Homo sapiens GN=OLFM1 PE=1 SV=4	30	55.3	0.759	0.934	0.754	0.649	0.608
Q99766	ATP synthase subunit s, mitochondrial OS=Homo sapiens GN=ATP5S PE=1 SV=3	4	24.9	0.71	0.754	0.637	0.636	0.672
Q99755	Phosphatidylinositol 4-phosphate 5-kinase type-1 alpha OS=Homo sapiens GN=PIP5K1A PE=1 SV=1	18	62.6	0.81	0.778	0.772	0.926	0.988
Q99732	Lipopolysaccharide-induced tumor necrosis factor-alpha factor OS=Homo sapiens GN=LITAF PE=1 SV=2	2	17.1	1.023	1.036	0.811	0.844	0.929
Q99729-3	Isoform 3 of Heterogeneous nuclear ribonucleoprotein A/B OS=Homo sapiens GN=HNRNPAB	18	30.6	1.078	1.174	1.072	1.008	1.308
Q99726	Zinc transporter 3 OS=Homo sapiens GN=SLC30A3 PE=1 SV=2	23	41.9	0.731	0.781	0.729	0.774	0.7
Q99700	Ataxin-2 OS=Homo sapiens GN=ATXN2 PE=1 SV=2	18	140.2	0.8	0.828	0.756	0.754	0.692
Q99698	Lysosomal-trafficking regulator OS=Homo sapiens GN=LYST PE=1 SV=3	5	428.9	0.797	0.882	0.905	0.774	0.615
Q99674	Cell growth regulator with EF hand domain protein 1 OS=Homo sapiens GN=CGREF1 PE=2 SV=2	4	31.9	0.976	1.017	0.964	0.842	0.811
Q99624	Sodium-coupled neutral amino acid transporter 3 OS=Homo sapiens GN=SLC38A3 PE=1 SV=1	2	55.7	1.164	1.199	1.229	1.304	1.353
Q99623	Prohibitin-2 OS=Homo sapiens GN=PHB2 PE=1 SV=2	55	33.3	0.785	0.967	0.781	0.607	0.514
Q99622	Protein C10 OS=Homo sapiens GN=C12orf57 PE=1 SV=1	9	13.2	1.139	1.037	1.274	1.324	1.189
Q99615	DnaJ homolog subfamily C member 7 OS=Homo sapiens GN=DNAJC7 PE=1 SV=2	18	56.4	0.978	0.965	1.002	0.91	0.961
Q99611	Selenide, water dikinase 2 OS=Homo sapiens GN=SEPHS2 PE=1 SV=3	2	47.3
Q99584	Protein S100-A13 OS=Homo sapiens GN=S100A13 PE=1 SV=1	31	11.5	1.036	1.236	0.97	1.143	1.109
Q99567	Nuclear pore complex protein Nup88 OS=Homo sapiens GN=NUP88 PE=1 SV=2	2	83.5	0.794	0.95	0.971	1.32	1.109
Q99549-2	Isoform 2 of M-phase phosphoprotein 8 OS=Homo sapiens GN=MPHOSPH8	2	97.6
Q99543	DnaJ homolog subfamily C member 2 OS=Homo sapiens GN=DNAJC2 PE=1 SV=4	1	72
Q99536	Synaptic vesicle membrane protein VAT-1 homolog OS=Homo sapiens GN=VAT1 PE=1 SV=2	41	41.9	1.01	1.037	1.023	1.27	1.317
Q99497	Protein deglycase DJ-1 OS=Homo sapiens GN=PARK7 PE=1 SV=2	105	19.9	1.064	0.948	1.061	1.047	1.14
Q99496	E3 ubiquitin-protein ligase RING2 OS=Homo sapiens GN=RNF2 PE=1 SV=1	4	37.6	100	100		100
Q99489-3	Isoform 3 of D-aspartate oxidase OS=Homo sapiens GN=DDO	2	41
Q99471	Prefoldin subunit 5 OS=Homo sapiens GN=PFDN5 PE=1 SV=2	27	17.3	1.007	0.993	1.091	1.241	1.237
Q99447-3	Isoform 3 of Ethanolamine-phosphate cytidylyltransferase OS=Homo sapiens GN=PCYT2	24	45.6	1.077	0.928	1.109	1.1	1.159
Q99442	Translocation protein SEC62 OS=Homo sapiens GN=SEC62 PE=1 SV=1	16	45.8	1.038	1.152	1.174	1.139	1.336
Q99426	Tubulin-folding cofactor B OS=Homo sapiens GN=TBCB PE=1 SV=2	51	27.3	1.221	0.988	1.309	1.151	1.164
Q99424	Peroxisomal acyl-coenzyme A oxidase 2 OS=Homo sapiens GN=ACOX2 PE=1 SV=1	2	76.8	1.067	1.163	1.092	1.511	1.562
Q99250	Sodium channel protein type 2 subunit alpha OS=Homo sapiens GN=SCN2A PE=1 SV=3	65	227.8	0.752	0.853	0.732	0.656	0.516
Q96TC7	Regulator of microtubule dynamics protein 3 OS=Homo sapiens GN=RMDN3 PE=1 SV=2	16	52.1	1.093	1.056	1.076	0.963	1.006
Q96TA2	ATP-dependent zinc metalloprotease YME1L1 OS=Homo sapiens GN=YME1L1 PE=1 SV=2	10	86.4	0.79	0.955	0.815	0.763	0.74
Q96TA1	Niban-like protein 1 OS=Homo sapiens GN=FAM129B PE=1 SV=3	7	84.1	1.049	0.932	1.002	1.051	1.015
Q96T76-8	Isoform 5 of MMS19 nucleotide excision repair protein homolog OS=Homo sapiens GN=MMS19	6	115.6	0.844	0.989	0.873	1.007	0.801
Q96T66	Nicotinamide/nicotinic acid mononucleotide adenylyltransferase 3 OS=Homo sapiens GN=NMNAT3 PE=1 SV=2	2	28.3	0.971	0.841	0.97	0.788	0.687
Q96T60	Bifunctional polynucleotide phosphatase/kinase OS=Homo sapiens GN=PNKP PE=1 SV=1	2	57
Q96T51	RUN and FYVE domain-containing protein 1 OS=Homo sapiens GN=RUFY1 PE=1 SV=2	6	79.8	1.062	1.044	0.999	0.839	0.955
Q96T49	Protein phosphatase 1 regulatory inhibitor subunit 16B OS=Homo sapiens GN=PPP1R16B PE=1 SV=1	4	63.5	1.006	1.026	1.05	0.769	0.773
Q96T37	Putative RNA-binding protein 15 OS=Homo sapiens GN=RBM15 PE=1 SV=2	4	107.1	0.786	0.864	0.814	0.729	0.556
Q96T23	Remodeling and spacing factor 1 OS=Homo sapiens GN=RSF1 PE=1 SV=2	2	163.7	0.936	0.862	1.314	1.509	1.086
Q96T21	Selenocysteine insertion sequence-binding protein 2 OS=Homo sapiens GN=SECISBP2 PE=1 SV=2	2	95.4
Q96T17-2	Isoform 2 of MAP7 domain-containing protein 2 OS=Homo sapiens GN=MAP7D2	36	86.3	1.005	1.056	0.962	0.88	1.133
Q96SW2	Protein cereblon OS=Homo sapiens GN=CRBN PE=1 SV=1	8	50.5	0.916	0.897	0.922	0.968	0.968
Q96SU4-6	Isoform 6 of Oxysterol-binding protein-related protein 9 OS=Homo sapiens GN=OSBPL9	2	84.2	0.819	0.606	0.73	0.828	0.781
Q96SB4-3	Isoform 1 of SRSF protein kinase 1 OS=Homo sapiens GN=SRPK1	6	92.4
Q96S95	Calcium/calmodulin-dependent protein kinase II inhibitor 2 OS=Homo sapiens GN=CAMK2N2 PE=2 SV=1	2	8.7	0.568	0.649	0.58	0.678	0.422
Q96S55	ATPase WRNIP1 OS=Homo sapiens GN=WRNIP1 PE=1 SV=2	2	72.1	0.744	0.737	0.702	0.832	0.694
Q96S38	Ribosomal protein S6 kinase delta-1 OS=Homo sapiens GN=RPS6KC1 PE=1 SV=2	6	118.6	0.916	0.893	0.86	0.982	0.96
Q96S19	UPF0585 protein C16orf13 OS=Homo sapiens GN=C16orf13 PE=1 SV=2	13	22.6	1.357	1.299	1.163	1.062	1.14
Q96S06	Lipase maturation factor 1 OS=Homo sapiens GN=LMF1 PE=1 SV=1	2	64.8	0.487	0.896	0.929	0.52	0.539
Q96RZ2	N-acetylglucosamine-1-phosphate transferase, gamma subunit, isoform CRA_b OS=Homo sapiens GN=RJD9 PE=4 SV=1	4	36.8	1.093	1.074	1.049	1.042	1.112
Q96RY7	Intraflagellar transport protein 140 homolog OS=Homo sapiens GN=IFT140 PE=1 SV=1	4	165.1	0.824	0.858	0.87	0.881	0.727
Q96RU3	Formin-binding protein 1 OS=Homo sapiens GN=FNBP1 PE=1 SV=2	26	71.3	1.078	1.021	1.048	1.091	1.253
Q96RT1-8	Isoform 8 of Erbin OS=Homo sapiens GN=ERBIN	13	158.9	1.028	1.039	1.117	1.12	1.09
Q96RS6	NudC domain-containing protein 1 OS=Homo sapiens GN=NUDCD1 PE=1 SV=2	2	66.7	0.901	0.819	1.045	1.198	1.238
Q96RR4	Calcium/calmodulin-dependent protein kinase kinase 2 OS=Homo sapiens GN=CAMKK2 PE=1 SV=2	34	64.7	0.831	0.928	0.766	0.731	0.624
Q96RQ3	Methylcrotonoyl-CoA carboxylase subunit alpha, mitochondrial OS=Homo sapiens GN=MCCC1 PE=1 SV=3	18	80.4	0.891	0.887	0.931	0.995	0.887
Q96RL8	NOGO-interacting mitochondrial protein OS=Homo sapiens GN=NIMP PE=2 SV=1	9	43.7	1.064	0.974	0.952	0.893	1.089
Q96RL7-2	Isoform 2 of Vacuolar protein sorting-associated protein 13A OS=Homo sapiens GN=VPS13A	38	350.7	0.943	0.988	0.956	0.888	0.864
Q96RK4-2	Isoform 2 of Bardet-Biedl syndrome 4 protein OS=Homo sapiens GN=BBS4	2	59	1.066	0.961	1.337	0.917	0.972
Q96RG5	Insulin receptor substrate 2 insertion mutant (Fragment) OS=Homo sapiens GN=IRS2 PE=4 SV=1	10	137.3	0.956	0.934	0.942	1.025	0.988
Q96RF0	Sorting nexin-18 OS=Homo sapiens GN=SNX18 PE=1 SV=2	10	68.9	1.04	1.063	1.073	1.264	1.338
Q96QZ7	Membrane-associated guanylate kinase, WW and PDZ domain-containing protein 1 OS=Homo sapiens GN=MAGI1 PE=1 SV=3	14	164.5	1.005	1	0.925	0.881	0.989
Q96QU8	Exportin-6 OS=Homo sapiens GN=XPO6 PE=1 SV=1	2	128.8
Q96QR8	Transcriptional activator protein Pur-beta OS=Homo sapiens GN=PURB PE=1 SV=3	12	33.2	0.772	0.842	0.743	0.834	0.836
Q96QK1	Vacuolar protein sorting-associated protein 35 OS=Homo sapiens GN=VPS35 PE=1 SV=2	87	91.6	0.829	0.868	0.926	0.919	0.755
Q96QF0	Rab-3A-interacting protein OS=Homo sapiens GN=RAB3IP PE=1 SV=1	2	53	0.721	1.174	0.601	0.632	0.916
Q96QE2	Proton myo-inositol cotransporter OS=Homo sapiens GN=SLC2A13 PE=1 SV=3	26	70.3	0.822	0.938	0.936	1.015	0.745
Q96Q42	Alsin OS=Homo sapiens GN=ALS2 PE=1 SV=2	12	183.5	0.901	0.928	0.919	0.845	0.831
Q96Q15	Serine/threonine-protein kinase SMG1 OS=Homo sapiens GN=SMG1 PE=1 SV=3	6	410.2	0.584	0.584	0.65	0.705	0.607
Q96Q06-2	Isoform 2 of Perilipin-4 OS=Homo sapiens GN=PLIN4	22	140.6	1.169	1.014	1.548	1.598	1.591
Q96Q05-2	Isoform 2 of Trafficking protein particle complex subunit 9 OS=Homo sapiens GN=TRAPPC9	24	139.3	0.925	0.913	0.935	0.89	0.853
Q96PY6-3	Isoform 3 of Serine/threonine-protein kinase Nek1 OS=Homo sapiens GN=NEK1	4	145.7	0.747	0.669	0.52	0.01	0.01
Q96PY5	Formin-like protein 2 OS=Homo sapiens GN=FMNL2 PE=1 SV=3	93	123.2	1.199	1.186	1.18	1.161	1.467
Q96PV0	Ras/Rap GTPase-activating protein SynGAP OS=Homo sapiens GN=SYNGAP1 PE=1 SV=4	77	148.2	1.001	0.866	0.892	0.755	0.625
Q96PU8	Protein quaking OS=Homo sapiens GN=QKI PE=1 SV=1	25	37.6	1.101	1.081	1.063	1.205	1.228
Q96PU5	E3 ubiquitin-protein ligase NEDD4-like OS=Homo sapiens GN=NEDD4L PE=1 SV=2	17	111.9	0.965	0.948	0.897	0.9	0.847
Q96PQ0	VPS10 domain-containing receptor SorCS2 OS=Homo sapiens GN=SORCS2 PE=1 SV=3	7	128.1	0.86	0.966	0.901	1.104	1.139
Q96PK6	RNA-binding protein 14 OS=Homo sapiens GN=RBM14 PE=1 SV=2	24	69.4	0.837	0.866	0.807	0.78	0.752
Q96PE7	Methylmalonyl-CoA epimerase, mitochondrial OS=Homo sapiens GN=MCEE PE=1 SV=1	6	18.7	0.94	1.016	0.916	0.669	0.654
Q96PE5	Opalin OS=Homo sapiens GN=OPALIN PE=2 SV=1	42	15.7	1.516	1.317	1.262	1.171	1.699
Q96PE3	Type I inositol 3,4-bisphosphate 4-phosphatase OS=Homo sapiens GN=INPP4A PE=1 SV=1	31	109.9	0.869	0.88	0.919	0.872	0.832
Q96PE2	Rho guanine nucleotide exchange factor 17 OS=Homo sapiens GN=ARHGEF17 PE=1 SV=1	8	221.5	0.998	1.059	0.991	0.942	0.864
Q96PC5	Melanoma inhibitory activity protein 2 OS=Homo sapiens GN=MIA2 PE=1 SV=4	6	159.7	0.951	0.949	0.927	0.8	0.929
Q96PB7	Noelin-3 OS=Homo sapiens GN=OLFM3 PE=1 SV=1	10	54.9	0.847	0.96	0.828	0.776	0.726
Q96P70	Importin-9 OS=Homo sapiens GN=IPO9 PE=1 SV=3	12	115.9	0.94	0.877	0.973	0.974	0.798
Q96P50	Arf-GAP with coiled-coil, ANK repeat and PH domain-containing protein 3 OS=Homo sapiens GN=ACAP3 PE=1 SV=2	4	92.4	0.818	0.898	0.833	0.75	0.582
Q96P48	Arf-GAP with Rho-GAP domain, ANK repeat and PH domain-containing protein 1 OS=Homo sapiens GN=ARAP1 PE=1 SV=3	8	162.1	0.963	0.915	1.005	0.983	1.001
Q96P47-4	Isoform 4 of Arf-GAP with GTPase, ANK repeat and PH domain-containing protein 3 OS=Homo sapiens GN=AGAP3	28	97.9	0.798	0.885	0.823	0.885	0.742
Q96NY7	Chloride intracellular channel protein 6 OS=Homo sapiens GN=CLIC6 PE=2 SV=3	2	73	1.035	0.969	1.258	0.907	0.616
Q96NW7	Leucine-rich repeat-containing protein 7 OS=Homo sapiens GN=LRRC7 PE=1 SV=1	4	172.5	1.065	0.851	1.098	0.852	0.655
Q96NT5	Proton-coupled folate transporter OS=Homo sapiens GN=SLC46A1 PE=1 SV=1	1	49.7	1.36	1.634	1.074	1.057	1.123
Q96NT1	Nucleosome assembly protein 1-like 5 OS=Homo sapiens GN=NAP1L5 PE=2 SV=1	23	19.6	0.99	1.039	1.062	1.003	1.052
Q96NN9	Apoptosis-inducing factor 3 OS=Homo sapiens GN=AIFM3 PE=1 SV=1	12	66.7	0.988	1.009	0.998	0.921	0.914
Q96NL6	Sodium channel and clathrin linker 1 OS=Homo sapiens GN=SCLT1 PE=1 SV=2	4	80.9
Q96NL0	RUN domain-containing protein 3B OS=Homo sapiens GN=RUNDC3B PE=2 SV=1	2	52.8	1.931	0.822	0.91	0.909	1.083
Q96ND0	Protein FAM210A OS=Homo sapiens GN=FAM210A PE=1 SV=2	4	30.8	0.972	1.17	0.891	0.927	0.837
Q96NC0	Zinc finger matrin-type protein 2 OS=Homo sapiens GN=ZMAT2 PE=1 SV=1	2	23.6	0.97	1.132	0.978	1.171	1.22
Q96N67	Dedicator of cytokinesis protein 7 OS=Homo sapiens GN=DOCK7 PE=1 SV=4	4	242.4	0.972	1.021	1.098	1.027	1.072
Q96N66	Lysophospholipid acyltransferase 7 OS=Homo sapiens GN=MBOAT7 PE=1 SV=2	12	52.7	1.043	0.941	0.928	0.848	0.818
Q96N16-2	Isoform 2 of Janus kinase and microtubule-interacting protein 1 OS=Homo sapiens GN=JAKMIP1	6	97.4	0.846	0.803	0.793	0.775	0.741
Q96MZ0	Ganglioside-induced differentiation-associated protein 1-like 1 OS=Homo sapiens GN=GDAP1L1 PE=2 SV=2	31	41.9	0.757	0.843	0.809	0.725	0.621
Q96MF6	Coenzyme Q-binding protein COQ10 homolog A, mitochondrial OS=Homo sapiens GN=COQ10A PE=2 SV=2	2	27.7	0.903	0.897	0.881	0.883	0.845
Q96ME7	Zinc finger protein 512 OS=Homo sapiens GN=ZNF512 PE=1 SV=2	2	64.6	1.02	1.194	0.927	0.956	0.762
Q96ME1-4	Isoform 4 of F-box/LRR-repeat protein 18 OS=Homo sapiens GN=FBXL18	16	78.9	0.784	0.858	0.873	0.9	0.768
Q96M27-2	Isoform 2 of Protein PRRC1 OS=Homo sapiens GN=PRRC1	6	48.5	1.007	1.025	1.028	1.048	1.087
Q96LW7	Caspase recruitment domain-containing protein 19 OS=Homo sapiens GN=CARD19 PE=1 SV=1	4	25.6	1.063	1.004	1.007	0.911	0.828
Q96LT7	Protein C9orf72 OS=Homo sapiens GN=C9orf72 PE=1 SV=2	2	54.3	0.94	0.945	0.868	0.823	0.685
Q96LR5	Ubiquitin-conjugating enzyme E2 E2 OS=Homo sapiens GN=UBE2E2 PE=1 SV=1	4	22.2	1.282	1.137	1.246	0.832	0.945
Q96LR2	Leucine rich adaptor protein 1 OS=Homo sapiens GN=LURAP1 PE=1 SV=1	2	25.8	0.778	0.676	0.795	0.779	0.629
Q96LJ7	Dehydrogenase/reductase SDR family member 1 OS=Homo sapiens GN=DHRS1 PE=1 SV=1	4	33.9	0.555	0.507	0.672	0.893	0.926
Q96LI6	Heat shock transcription factor, Y-linked OS=Homo sapiens GN=HSFY1 PE=1 SV=1	1	45.1
Q96LD4	Tripartite motif-containing protein 47 OS=Homo sapiens GN=TRIM47 PE=1 SV=2	2	69.5	0.713	0.727	0.794	0.85	0.744
Q96L92	Sorting nexin-27 OS=Homo sapiens GN=SNX27 PE=1 SV=2	12	61.2	0.86	0.94	0.82	0.707	0.669
Q96L91	E1A-binding protein p400 OS=Homo sapiens GN=EP400 PE=1 SV=4	2	343.3	0.712	0.859	0.781	0.515	0.421
Q96L34-2	Isoform 2 of MAP/microtubule affinity-regulating kinase 4 OS=Homo sapiens GN=MARK4	16	75.3	1.137	1.089	1.103	0.905	0.86
Q96KR6	Protein FAM210B OS=Homo sapiens GN=FAM210B PE=1 SV=2	5	20.4	0.923	1.251	1.482	1.745	1.261
Q96KQ4	Apoptosis-stimulating of p53 protein 1 OS=Homo sapiens GN=PPP1R13B PE=1 SV=3	10	119.5	0.866	0.897	0.827	0.754	0.761
Q96KM6	Zinc finger protein 512B OS=Homo sapiens GN=ZNF512B PE=1 SV=1	6	97.2	0.985	0.841	0.847	0.89	0.788
Q96KG9	N-terminal kinase-like protein OS=Homo sapiens GN=SCYL1 PE=1 SV=1	16	89.6	0.945	0.933	0.929	0.854	0.852
Q96KG7	Multiple epidermal growth factor-like domains protein 10 OS=Homo sapiens GN=MEGF10 PE=1 SV=1	4	122.1	1.266	1.263	1.54	2.006	2.124
Q96KF7	Small integral membrane protein 8 OS=Homo sapiens GN=SMIM8 PE=1 SV=2	2	11.1	0.534	1.093	0.908	1.159	1.175
Q96K76-4	Isoform 4 of Ubiquitin carboxyl-terminal hydrolase 47 OS=Homo sapiens GN=USP47	16	154.6	0.968	0.911	0.95	0.894	0.867
Q96K68	cDNA FLJ14473 fis, clone MAMMA1001080, highly similar to Homo sapiens SNC73 protein (SNC73) mRNA OS=Homo sapiens PE=2 SV=1	77	53.1	1.46	0.888	1.424	1.185	1.698
Q96K21	Abscission/NoCut checkpoint regulator OS=Homo sapiens GN=ZFYVE19 PE=1 SV=3	4	51.5	1.011	0.962	1.08	0.89	1.022
Q96K19	E3 ubiquitin-protein ligase RNF170 OS=Homo sapiens GN=RNF170 PE=1 SV=2	8	29.8	0.829	0.982	0.923	0.979	1.065
Q96K17	Transcription factor BTF3 homolog 4 OS=Homo sapiens GN=BTF3L4 PE=1 SV=1	13	17.3	0.861	0.71	0.915	0.818	0.847
Q96JY6-5	Isoform 5 of PDZ and LIM domain protein 2 OS=Homo sapiens GN=PDLIM2	2	62.7	0.964	1.233	1.36	1.543	1.66
Q96JX3	Protein SERAC1 OS=Homo sapiens GN=SERAC1 PE=1 SV=1	4	74.1	0.98	0.982	0.966	0.952	0.947
Q96JV8	cDNA FLJ14943 fis, clone PLACE1011371, weakly similar to INTER-ALPHA-TRYPSIN INHIBITOR HEAVY CHAIN H2 OS=Homo sapiens PE=2 SV=1	2	44.3
Q96JQ0	Protocadherin-16 OS=Homo sapiens GN=DCHS1 PE=1 SV=1	2	346	1.277	1.193	1.11	0.714	0.89
Q96JN2-4	Isoform 4 of Coiled-coil domain-containing protein 136 OS=Homo sapiens GN=CCDC136	14	134.6	0.776	1.037	0.829	0.689	0.698
Q96JM3	Chromosome alignment-maintaining phosphoprotein 1 OS=Homo sapiens GN=CHAMP1 PE=1 SV=2	2	89	0.769	0.823	0.792	0.554	0.551
Q96JK2	DDB1- and CUL4-associated factor 5 OS=Homo sapiens GN=DCAF5 PE=1 SV=2	4	103.9	0.886	0.951	0.757	0.585	0.481
Q96JJ7	Protein disulfide-isomerase TMX3 OS=Homo sapiens GN=TMX3 PE=1 SV=2	30	51.8	0.854	0.976	0.883	0.777	0.837
Q96JH7	Deubiquitinating protein VCIP135 OS=Homo sapiens GN=VCPIP1 PE=1 SV=2	44	134.2	0.954	0.952	0.894	0.809	0.775
Q96JG6	Syndetin OS=Homo sapiens GN=VPS50 PE=1 SV=3	20	111.1	0.79	0.904	0.809	0.705	0.626
Q96JE9	Microtubule-associated protein 6 OS=Homo sapiens GN=MAP6 PE=1 SV=2	186	86.5	0.902	0.932	0.965	0.9	0.909
Q96JC1	Vam6/Vps39-like protein OS=Homo sapiens GN=VPS39 PE=1 SV=2	4	101.7	0.775	0.905	0.905	0.835	0.933
Q96JB5	CDK5 regulatory subunit-associated protein 3 OS=Homo sapiens GN=CDK5RAP3 PE=1 SV=2	17	56.9	0.964	0.888	1.003	0.927	0.892
Q96JB2	Conserved oligomeric Golgi complex subunit 3 OS=Homo sapiens GN=COG3 PE=1 SV=3	2	94	0.713	0.775	0.7	0.828	0.777
Q96J87	CUGBP Elav-like family member 6 OS=Homo sapiens GN=CELF6 PE=1 SV=1	2	50.4	1.318	1.103	1.019	1.031	1.068
Q96J02	E3 ubiquitin-protein ligase Itchy homolog OS=Homo sapiens GN=ITCH PE=1 SV=2	24	102.7	0.872	0.955	0.869	0.742	0.761
Q96IZ0	PRKC apoptosis WT1 regulator protein OS=Homo sapiens GN=PAWR PE=1 SV=1	8	36.5	1.138	1.26	1.072	1.435	1.353
Q96IX5	Up-regulated during skeletal muscle growth protein 5 OS=Homo sapiens GN=USMG5 PE=1 SV=1	10	6.5	0.941	1.209	0.883	0.852	0.998
Q96IV0	Peptide-N(4)-(N-acetyl-beta-glucosaminyl)asparagine amidase OS=Homo sapiens GN=NGLY1 PE=1 SV=1	2	74.3	0.856	1.107	1.039	1.059	1.279
Q96IS6	HSPA8 protein (Fragment) OS=Homo sapiens GN=HSPA8 PE=1 SV=2	594	64.6	1.083	1.091	1.396	1.587	1.501
Q96IJ6-2	Isoform 2 of Mannose-1-phosphate guanyltransferase alpha OS=Homo sapiens GN=GMPPA	12	52	0.796	0.874	0.841	0.838	0.823
Q96ID5	Immunoglobulin superfamily member 21 OS=Homo sapiens GN=IGSF21 PE=2 SV=1	35	51.8	0.988	0.996	0.973	0.993	0.867
Q96I99	Succinate--CoA ligase [GDP-forming] subunit beta, mitochondrial OS=Homo sapiens GN=SUCLG2 PE=1 SV=2	24	46.5	1.033	0.932	1.161	1.032	0.96
Q96I34	Protein phosphatase 1 regulatory subunit 16A OS=Homo sapiens GN=PPP1R16A PE=1 SV=1	2	57.8	0.719	0.819	0.616	0.606	0.535
Q96I23	Protein preY, mitochondrial OS=Homo sapiens GN=PYURF PE=1 SV=1	2	12.6	1.164	1.102	0.969	0.846	1.045
Q96HY7	Probable 2-oxoglutarate dehydrogenase E1 component DHKTD1, mitochondrial OS=Homo sapiens GN=DHTKD1 PE=1 SV=2	9	103	1.201	1.102	1.078	1.004	1.208
Q96HY6	DDRGK domain-containing protein 1 OS=Homo sapiens GN=DDRGK1 PE=1 SV=2	22	35.6	1.064	1.036	0.996	0.998	1.028
Q96HX0	TUBB2C protein (Fragment) OS=Homo sapiens GN=TUBB2C PE=2 SV=1	870	25.9	0.623	0.878	0.784	0.923	0.715
Q96HU8	GTP-binding protein Di-Ras2 OS=Homo sapiens GN=DIRAS2 PE=1 SV=1	23	22.5	0.712	0.773	0.723	0.709	0.599
Q96HS1	Serine/threonine-protein phosphatase PGAM5, mitochondrial OS=Homo sapiens GN=PGAM5 PE=1 SV=2	22	32	1.175	1.221	1.071	1.074	1.115
Q96HR9	Receptor expression-enhancing protein 6 OS=Homo sapiens GN=REEP6 PE=1 SV=1	2	20.7	1.578	1.349	1.42	1.309	1.643
Q96HR8	H/ACA ribonucleoprotein complex non-core subunit NAF1 OS=Homo sapiens GN=NAF1 PE=1 SV=2	1	53.7	0.675	0.671	0.832	0.667	0.536
Q96HN2	Adenosylhomocysteinase 3 OS=Homo sapiens GN=AHCYL2 PE=1 SV=1	79	66.7	1.011	1.012	1.052	1.095	1.099
Q96HH9	GRAM domain-containing protein 3 OS=Homo sapiens GN=GRAMD3 PE=1 SV=1	5	47.8	0.998	0.995	1.112	1.195	1.096
Q96HE7	ERO1-like protein alpha OS=Homo sapiens GN=ERO1A PE=1 SV=2	12	54.4	0.914	1.034	0.971	0.998	0.925
Q96HD1-2	Isoform 2 of Cysteine-rich with EGF-like domain protein 1 OS=Homo sapiens GN=CRELD1	20	45.9	1.019	1.1	1.197	1.162	1.212
Q96HA1	Nuclear envelope pore membrane protein POM 121 OS=Homo sapiens GN=POM121 PE=1 SV=2	2	127.6	0.942	0.977	0.913	0.849	0.886
Q96H20	Vacuolar-sorting protein SNF8 OS=Homo sapiens GN=SNF8 PE=1 SV=1	4	28.8	1.003	1.027	0.997	0.821	0.895
Q96GZ6	Solute carrier family 41 member 3 OS=Homo sapiens GN=SLC41A3 PE=1 SV=2	6	54.7	1.071	1.048	1.02	1.059	0.92
Q96GX2	Putative ataxin-7-like protein 3B OS=Homo sapiens GN=ATXN7L3B PE=3 SV=2	2	10.8	1.137	1.06	0.993	1.075	0.875
Q96GW9	Methionine--tRNA ligase, mitochondrial OS=Homo sapiens GN=MARS2 PE=1 SV=2	6	66.5	1.072	1.121	1.079	1.008	1.056
Q96GW7	Brevican core protein OS=Homo sapiens GN=BCAN PE=1 SV=2	173	99.1	1.103	1.092	1.172	1.293	1.368
Q96GS4	BLOC-1-related complex subunit 6 OS=Homo sapiens GN=BORCS6 PE=1 SV=2	7	37.2	0.966	0.979	1.052	1.066	1.159
Q96GM1-2	Isoform 2 of Phospholipid phosphatase-related protein type 2 OS=Homo sapiens GN=PLPPR2	2	45.5	0.987	0.955	1.009	1.176	1.051
Q96GL9	Protein FAM163A OS=Homo sapiens GN=FAM163A PE=2 SV=1	2	17.6	0.836	1.461	0.627	0.727	0.579
Q96GK7	Fumarylacetoacetate hydrolase domain-containing protein 2A OS=Homo sapiens GN=FAHD2A PE=1 SV=1	28	34.6	1.056	1.031	1.124	1.334	1.212
Q96GG9	DCN1-like protein 1 OS=Homo sapiens GN=DCUN1D1 PE=1 SV=1	12	30.1	0.904	0.909	1.072	1.261	1.38
Q96GF1	E3 ubiquitin-protein ligase RNF185 OS=Homo sapiens GN=RNF185 PE=1 SV=1	6	20.4	1.154	1.283	1.146	0.795	0.972
Q96GD0	Pyridoxal phosphate phosphatase OS=Homo sapiens GN=PDXP PE=1 SV=2	45	31.7	0.945	0.836	0.876	0.889	0.825
Q96GC5	39S ribosomal protein L48, mitochondrial OS=Homo sapiens GN=MRPL48 PE=1 SV=2	4	23.9	0.815	0.987	0.823	0.72	0.792
Q96G28-2	Isoform 2 of Cilia- and flagella-associated protein 36 OS=Homo sapiens GN=CFAP36	6	41.9	1.071	0.943	0.994	0.801	0.848
Q96G25-2	Isoform 2 of Mediator of RNA polymerase II transcription subunit 8 OS=Homo sapiens GN=MED8	2	32.8
Q96G03	Phosphoglucomutase-2 OS=Homo sapiens GN=PGM2 PE=1 SV=4	8	68.2	0.973	0.888	0.979	1.096	0.989
Q96G01	Protein bicaudal D homolog 1 OS=Homo sapiens GN=BICD1 PE=1 SV=3	2	110.7	0.859	0.916	0.89	1.087	0.914
Q96FZ7	Charged multivesicular body protein 6 OS=Homo sapiens GN=CHMP6 PE=1 SV=3	18	23.5	1.239	1.166	1.162	1.161	1.335
Q96FS4	Signal-induced proliferation-associated protein 1 OS=Homo sapiens GN=SIPA1 PE=1 SV=1	6	112.1	1.092	0.813	1.129	1.033	1.054
Q96FQ6	Protein S100-A16 OS=Homo sapiens GN=S100A16 PE=1 SV=1	20	11.8	1.092	1.107	1.02	1.114	1.051
Q96FJ2	Dynein light chain 2, cytoplasmic OS=Homo sapiens GN=DYNLL2 PE=1 SV=1	37	10.3	0.863	0.916	0.942	1.111	1.058
Q96FH0	BLOC-1-related complex subunit 8 OS=Homo sapiens GN=BORCS8 PE=1 SV=1	1	13.4
Q96FE7	Phosphoinositide-3-kinase-interacting protein 1 OS=Homo sapiens GN=PIK3IP1 PE=1 SV=2	2	28.2	1.435	1.426	1.298	1.302	1.578
Q96FE5	Leucine-rich repeat and immunoglobulin-like domain-containing nogo receptor-interacting protein 1 OS=Homo sapiens GN=LINGO1 PE=1 SV=2	34	69.8	1.049	1.082	0.935	0.848	0.803
Q96F88	Processing of 1, ribonuclease P/MRP subunit (S. cerevisiae) OS=Homo sapiens GN=POP1 PE=2 SV=1	2	114.6	1.667	1.294	1.414	1.167	1.383
Q96F85	CB1 cannabinoid receptor-interacting protein 1 OS=Homo sapiens GN=CNRIP1 PE=1 SV=1	39	18.6	0.866	0.79	0.861	0.782	0.738
Q96F24	Nuclear receptor-binding factor 2 OS=Homo sapiens GN=NRBF2 PE=1 SV=1	2	32.4	1.379	1.315	1.292	1.303	1.888
Q96F07-2	Isoform 2 of Cytoplasmic FMR1-interacting protein 2 OS=Homo sapiens GN=CYFIP2	109	145.6	0.824	0.856	0.826	0.836	0.752
Q96EY7	Pentatricopeptide repeat domain-containing protein 3, mitochondrial OS=Homo sapiens GN=PTCD3 PE=1 SV=3	10	78.5	0.814	0.941	0.872	0.683	0.641
Q96EX1	Small integral membrane protein 12 OS=Homo sapiens GN=SMIM12 PE=1 SV=3	3	10.8	0.707	0.968	0.701	0.784	0.721
Q96ER9	Coiled-coil domain-containing protein 51 OS=Homo sapiens GN=CCDC51 PE=1 SV=2	10	45.8	1.132	1.05	1.12	1.056	1.152
Q96EQ0	Small glutamine-rich tetratricopeptide repeat-containing protein beta OS=Homo sapiens GN=SGTB PE=1 SV=1	12	33.4	1.701	0.94	1.344	1.058	1.179
Q96EM0	Trans-3-hydroxy-L-proline dehydratase OS=Homo sapiens GN=L3HYPDH PE=1 SV=2	7	38.1	1.395	1.107	1.322	1.183	1.568
Q96EL3	39S ribosomal protein L53, mitochondrial OS=Homo sapiens GN=MRPL53 PE=1 SV=1	4	12.1	0.824	1.111	0.832	0.579	0.804
Q96EK6	Glucosamine 6-phosphate N-acetyltransferase OS=Homo sapiens GN=GNPNAT1 PE=1 SV=1	2	20.7	1.281	1.041	1.092	1.064	1.049
Q96EI5-2	Isoform 2 of Transcription elongation factor A protein-like 4 OS=Homo sapiens GN=TCEAL4	4	40.6	0.968	0.932	1.117	1.142	1.155
Q96EE3-1	Isoform B of Nucleoporin SEH1 OS=Homo sapiens GN=SEH1L	7	46.5	0.991	0.966	1.079	1.211	1.153
Q96EB3	EEF1A1 protein (Fragment) OS=Homo sapiens GN=EEF1A1 PE=2 SV=1	35	17	0.944	0.991	0.9	1.018	0.87
Q96E39	RNA binding motif protein, X-linked-like-1 OS=Homo sapiens GN=RBMXL1 PE=1 SV=1	28	42.1	0.756	0.902	0.849	0.906	0.866
Q96E17	Ras-related protein Rab-3C OS=Homo sapiens GN=RAB3C PE=2 SV=1	112	25.9	0.983	0.975	0.955	0.886	0.775
Q96DZ9	CKLF-like MARVEL transmembrane domain-containing protein 5 OS=Homo sapiens GN=CMTM5 PE=1 SV=2	17	24.6	0.833	0.964	0.901	1.059	0.984
Q96DZ5	CAP-Gly domain-containing linker protein 3 OS=Homo sapiens GN=CLIP3 PE=1 SV=3	10	59.5	0.76	0.738	0.74	0.743	0.765
Q96DV4	39S ribosomal protein L38, mitochondrial OS=Homo sapiens GN=MRPL38 PE=1 SV=2	2	44.6	1.211	1.152	1.165	0.936	1.281
Q96DP0	cDNA FLJ31479 fis, clone NT2NE2001634, moderately similar to NADH-UBIQUINONE OXIDOREDUCTASE 9 KD SUBUNIT (EC 1.6.5.3) OS=Homo sapiens PE=2 SV=1	27	49.2	1.109	1.067	1.131	0.861	0.871
Q96DM3	Uncharacterized protein C18orf8 OS=Homo sapiens GN=C18orf8 PE=1 SV=2	8	74.9	0.871	0.947	0.945	0.878	0.98
Q96DI7-2	Isoform 2 of U5 small nuclear ribonucleoprotein 40 kDa protein OS=Homo sapiens GN=SNRNP40	2	44.5	0.76	0.9	0.847	0.673	0.749
Q96DH6	RNA-binding protein Musashi homolog 2 OS=Homo sapiens GN=MSI2 PE=1 SV=1	6	35.2	0.905	1.105	0.956	0.979	1
Q96DG6	Carboxymethylenebutenolidase homolog OS=Homo sapiens GN=CMBL PE=1 SV=1	10	28	0.747	0.853	1.105	1.52	1.155
Q96DE0	U8 snoRNA-decapping enzyme OS=Homo sapiens GN=NUDT16 PE=1 SV=2	12	21.3	0.898	0.892	0.895	0.897	0.907
Q96DD7	Protein shisa-4 OS=Homo sapiens GN=SHISA4 PE=2 SV=3	2	21.5	1.118	1.118	1.077	1.051	0.982
Q96DB5	Regulator of microtubule dynamics protein 1 OS=Homo sapiens GN=RMDN1 PE=1 SV=1	6	35.8
Q96DA6	Mitochondrial import inner membrane translocase subunit TIM14 OS=Homo sapiens GN=DNAJC19 PE=1 SV=3	22	12.5	1.366	1.305	1.106	0.942	1.019
Q96DA2	Ras-related protein Rab-39B OS=Homo sapiens GN=RAB39B PE=1 SV=1	46	24.6	0.924	0.91	0.857	0.792	0.713
Q96D71	RalBP1-associated Eps domain-containing protein 1 OS=Homo sapiens GN=REPS1 PE=1 SV=3	16	86.6	1.06	0.939	0.996	0.835	0.838
Q96D53	Atypical kinase COQ8B, mitochondrial OS=Homo sapiens GN=COQ8B PE=1 SV=2	1	60	0.608	0.812	0.674	0.945	0.758
Q96D15	Reticulocalbin-3 OS=Homo sapiens GN=RCN3 PE=1 SV=1	2	37.5	1.162	1.021	1.155	0.977	0.989
Q96D05-2	Isoform 2 of Uncharacterized protein C10orf35 OS=Homo sapiens GN=C10orf35	12	17.5	1.103	1.099	1.063	1.076	0.942
Q96CW5	Gamma-tubulin complex component 3 OS=Homo sapiens GN=TUBGCP3 PE=1 SV=2	10	103.5	0.816	0.9	0.967	1.037	0.946
Q96CU9	FAD-dependent oxidoreductase domain-containing protein 1 OS=Homo sapiens GN=FOXRED1 PE=1 SV=2	5	53.8	0.842	0.734	0.708	0.603	0.537
Q96CT7	Coiled-coil domain-containing protein 124 OS=Homo sapiens GN=CCDC124 PE=1 SV=1	21	25.8	0.938	1.041	0.922	0.89	1.006
Q96CS3	FAS-associated factor 2 OS=Homo sapiens GN=FAF2 PE=1 SV=2	28	52.6	0.838	0.948	0.867	0.856	0.769
Q96CQ1	Solute carrier family 25 member 36 OS=Homo sapiens GN=SLC25A36 PE=1 SV=1	4	34.3	0.875	1.155	0.963	0.878	0.859
Q96CN7	Isochorismatase domain-containing protein 1 OS=Homo sapiens GN=ISOC1 PE=1 SV=3	10	32.2	1.353	1.12	1.139	1.111	1.38
Q96CN4-2	Isoform 2 of EVI5-like protein OS=Homo sapiens GN=EVI5L	7	92.5	0.941	1.033	0.956	0.819	0.75
Q96CM8-2	Isoform 2 of Acyl-CoA synthetase family member 2, mitochondrial OS=Homo sapiens GN=ACSF2	4	70.6	0.73	0.848	0.849	0.783	0.736
Q96C86	m7GpppX diphosphatase OS=Homo sapiens GN=DCPS PE=1 SV=2	8	38.6	0.873	0.914	0.924	1.032	0.912
Q96C23	Aldose 1-epimerase OS=Homo sapiens GN=GALM PE=1 SV=1	6	37.7	1.204	1.19	1.392	1.348	1.483
Q96C19	EF-hand domain-containing protein D2 OS=Homo sapiens GN=EFHD2 PE=1 SV=1	71	26.7	1.024	0.971	1.072	0.978	0.99
Q96BZ9-3	Isoform 3 of TBC1 domain family member 20 OS=Homo sapiens GN=TBC1D20	2	48.4	0.405	0.613	0.25	0.25	0.252
Q96BZ8	Leukocyte receptor cluster member 1 OS=Homo sapiens GN=LENG1 PE=1 SV=1	2	30.5	1.042	1.098	1.003	1.228	1.077
Q96BY7	Autophagy-related protein 2 homolog B OS=Homo sapiens GN=ATG2B PE=1 SV=5	4	232.6	1.436	1.417	1.457	1.069	1.319
Q96BY6	Dedicator of cytokinesis protein 10 OS=Homo sapiens GN=DOCK10 PE=1 SV=3	14	249.4	1.226	1.186	1.143	1.253	1.221
Q96BY2	Modulator of apoptosis 1 OS=Homo sapiens GN=MOAP1 PE=1 SV=1	2	39.5	0.933	0.791	0.827	0.773	0.605
Q96BX8	MOB kinase activator 3A OS=Homo sapiens GN=MOB3A PE=1 SV=1	2	25.4	1.207	0.796	0.886	0.883	0.839
Q96BW9-3	Isoform 3 of Phosphatidate cytidylyltransferase, mitochondrial OS=Homo sapiens GN=TAMM41	4	38.1	0.772	0.858	0.802	0.732	0.775
Q96BW5	Phosphotriesterase-related protein OS=Homo sapiens GN=PTER PE=1 SV=1	2	39
Q96BW1	Uracil phosphoribosyltransferase homolog OS=Homo sapiens GN=UPRT PE=1 SV=1	2	33.8
Q96BT7-4	Isoform 4 of Alkylated DNA repair protein alkB homolog 8 OS=Homo sapiens GN=ALKBH8	2	75.5
Q96BS2	Calcineurin B homologous protein 3 OS=Homo sapiens GN=TESC PE=1 SV=3	18	24.7	1.107	1.643	1.147	0.954	1.065
Q96BR5	Cytochrome c oxidase assembly factor 7 OS=Homo sapiens GN=COA7 PE=1 SV=2	4	25.7	0.883	0.909	0.848	0.729	0.722
Q96BQ5	Coiled-coil domain-containing protein 127 OS=Homo sapiens GN=CCDC127 PE=1 SV=1	4	30.8	0.849	0.928	0.778	0.772	0.786
Q96BN8	Ubiquitin thioesterase otulin OS=Homo sapiens GN=OTULIN PE=1 SV=3	2	40.2	0.637	0.511	0.547	0.425	0.447
Q96BM9	ADP-ribosylation factor-like protein 8A OS=Homo sapiens GN=ARL8A PE=1 SV=1	23	21.4	1.243	1.029	1.145	1.001	1.296
Q96BK5	PIN2/TERF1-interacting telomerase inhibitor 1 OS=Homo sapiens GN=PINX1 PE=1 SV=2	2	37	2.005	1.687	1.816	1.347	1.459
Q96BJ3	Axin interactor, dorsalization-associated protein OS=Homo sapiens GN=AIDA PE=1 SV=1	4	35	1.033	0.877	1.006	1.084	1.037
Q96BH1	E3 ubiquitin-protein ligase RNF25 OS=Homo sapiens GN=RNF25 PE=1 SV=1	4	51.2	1.158	1.122	1.265	1.283	1.362
Q96BF6	Nucleus accumbens-associated protein 2 OS=Homo sapiens GN=NACC2 PE=1 SV=1	2	62.8	0.93	0.95	1.031	1.07	0.941
Q96B97	SH3 domain-containing kinase-binding protein 1 OS=Homo sapiens GN=SH3KBP1 PE=1 SV=2	37	73.1	0.924	1.001	0.879	0.874	0.877
Q96B77	Transmembrane protein 186 OS=Homo sapiens GN=TMEM186 PE=2 SV=1	2	24.9	0.968	0.871	0.78	0.901	0.688
Q96B49	Mitochondrial import receptor subunit TOM6 homolog OS=Homo sapiens GN=TOMM6 PE=1 SV=1	3	8	1.037	1.101	1.006	1.033	0.913
Q96B36-3	Isoform 3 of Proline-rich AKT1 substrate 1 OS=Homo sapiens GN=AKT1S1	7	29.2	1.019	0.907	0.882	0.844	0.866
Q96B18	Dapper homolog 3 OS=Homo sapiens GN=DACT3 PE=1 SV=2	2	64.9
Q96AX2-2	Isoform 2 of Ras-related protein Rab-37 OS=Homo sapiens GN=RAB37	41	24.2	1.153	1.187	1.125	1.107	1.122
Q96AW1	Vesicular, overexpressed in cancer, prosurvival protein 1 OS=Homo sapiens GN=VOPP1 PE=2 SV=1	2	19.2	0.942	0.909	0.839	0.708	0.795
Q96AT9	Ribulose-phosphate 3-epimerase OS=Homo sapiens GN=RPE PE=1 SV=1	6	24.9	1.188	1.144	1.812	2.356	2.979
Q96AQ8	Mitochondrial calcium uniporter regulator 1 OS=Homo sapiens GN=MCUR1 PE=1 SV=1	2	39.7	0.919	1.082	1.28	1.482	1.16
Q96AQ6	Pre-B-cell leukemia transcription factor-interacting protein 1 OS=Homo sapiens GN=PBXIP1 PE=1 SV=1	79	80.6	1.102	1.043	1.168	1.464	1.32
Q96AN5	Transmembrane protein 143 OS=Homo sapiens GN=TMEM143 PE=2 SV=1	4	51.7	0.938	1.116	0.852	0.854	1.013
Q96AJ9	Vesicle transport through interaction with t-SNAREs homolog 1A OS=Homo sapiens GN=VTI1A PE=1 SV=2	4	25.2	1.145	1.208	1.268	1.212	1.102
Q96AG4	Leucine-rich repeat-containing protein 59 OS=Homo sapiens GN=LRRC59 PE=1 SV=1	30	34.9	1.025	1.095	1.02	1.082	1.028
Q96AG3	Solute carrier family 25 member 46 OS=Homo sapiens GN=SLC25A46 PE=1 SV=1	10	46.1	0.798	1.17	0.902	0.972	0.848
Q96AE4-2	Isoform 2 of Far upstream element-binding protein 1 OS=Homo sapiens GN=FUBP1	22	68.6	1.117	1.174	1.088	0.987	0.945
Q96AB3-2	Isoform 2 of Isochorismatase domain-containing protein 2 OS=Homo sapiens GN=ISOC2	25	24.1	0.802	0.872	0.847	0.868	0.869
Q96AA8-3	Isoform 3 of Janus kinase and microtubule-interacting protein 2 OS=Homo sapiens GN=JAKMIP2	8	96.2	0.936	0.998	0.944	0.959	0.88
Q96A84-3	Isoform 3 of EMI domain-containing protein 1 OS=Homo sapiens GN=EMID1	2	45.4	0.904	1.015	0.919	1.184	1.098
Q96A73	Putative monooxygenase p33MONOX OS=Homo sapiens GN=KIAA1191 PE=1 SV=1	6	33.2	0.954	1.018	0.855	0.756	0.824
Q96A57-2	Isoform 1 of Transmembrane protein 230 OS=Homo sapiens GN=TMEM230	6	19.9	1.092	1.175	1.092	0.974	1.068
Q96A33	Coiled-coil domain-containing protein 47 OS=Homo sapiens GN=CCDC47 PE=1 SV=1	20	55.8	0.981	1.059	0.96	0.921	0.963
Q96A26	Protein FAM162A OS=Homo sapiens GN=FAM162A PE=1 SV=2	41	17.3	1.075	1.257	0.962	0.87	0.893
Q96A00	Protein phosphatase 1 regulatory subunit 14A OS=Homo sapiens GN=PPP1R14A PE=1 SV=1	13	16.7	0.932	0.918	0.996	1.224	1.595
Q969Z3	Mitochondrial amidoxime reducing component 2 OS=Homo sapiens GN=MARC2 PE=1 SV=1	19	38	1.214	1.192	1.074	0.979	1.017
Q969Y2-2	Isoform 2 of tRNA modification GTPase GTPBP3, mitochondrial OS=Homo sapiens GN=GTPBP3	6	55.5	0.936	0.876	0.867	0.746	0.863
Q969X5	Endoplasmic reticulum-Golgi intermediate compartment protein 1 OS=Homo sapiens GN=ERGIC1 PE=1 SV=1	14	32.6	0.963	1.07	0.983	1.043	0.969
Q969V5	Mitochondrial ubiquitin ligase activator of NFKB 1 OS=Homo sapiens GN=MUL1 PE=1 SV=1	2	39.8
Q969V3	Nicalin OS=Homo sapiens GN=NCLN PE=1 SV=2	8	62.9	1.03	1.113	0.914	0.87	0.881
Q969T9	WW domain-binding protein 2 OS=Homo sapiens GN=WBP2 PE=1 SV=1	12	28.1	0.95	0.919	0.973	1.038	1.103
Q969T4	Ubiquitin-conjugating enzyme E2 E3 OS=Homo sapiens GN=UBE2E3 PE=1 SV=1	4	22.9	1.195	2.252	1.243	0.862	1.368
Q969S9	Ribosome-releasing factor 2, mitochondrial OS=Homo sapiens GN=GFM2 PE=1 SV=1	2	86.5
Q969R2	Oxysterol-binding protein 2 OS=Homo sapiens GN=OSBP2 PE=1 SV=2	7	101.2	0.911	0.897	0.844	0.747	0.824
Q969Q5	Ras-related protein Rab-24 OS=Homo sapiens GN=RAB24 PE=1 SV=1	6	23.1	0.895	0.987	0.899	0.802	0.726
Q969P0	Immunoglobulin superfamily member 8 OS=Homo sapiens GN=IGSF8 PE=1 SV=1	106	65	1.128	1.104	1.047	1.034	1.073
Q969N2	GPI transamidase component PIG-T OS=Homo sapiens GN=PIGT PE=1 SV=1	2	65.7
Q969M7	NEDD8-conjugating enzyme UBE2F OS=Homo sapiens GN=UBE2F PE=1 SV=1	4	21.1	0.689	0.962	1.123	0.999	0.865
Q969M3-3	Isoform 3 of Protein YIPF5 OS=Homo sapiens GN=YIPF5	2	29.1	0.979	1.304	0.821	0.877	1.023
Q969M1	Mitochondrial import receptor subunit TOM40B OS=Homo sapiens GN=TOMM40L PE=1 SV=1	6	33.9	1.112	0.902	0.744	0.817	0.782
Q969J3	BLOC-1-related complex subunit 5 OS=Homo sapiens GN=BORCS5 PE=1 SV=1	12	22.2	0.989	1.118	0.966	1.017	1.075
Q969E8	Pre-rRNA-processing protein TSR2 homolog OS=Homo sapiens GN=TSR2 PE=1 SV=1	4	20.9	0.837	0.924	1.296	1.206	0.879
Q969E4	Transcription elongation factor A protein-like 3 OS=Homo sapiens GN=TCEAL3 PE=1 SV=1	27	22.5	0.934	1.162	0.953	1.292	1.188
Q969E2	Secretory carrier-associated membrane protein 4 OS=Homo sapiens GN=SCAMP4 PE=1 SV=1	12	25.7	1.053	1.297	1.016	1.067	1.1
Q93100-3	Isoform 3 of Phosphorylase b kinase regulatory subunit beta OS=Homo sapiens GN=PHKB	12	124.7	1.005	1.102	1.009	0.958	0.929
Q93050	V-type proton ATPase 116 kDa subunit a isoform 1 OS=Homo sapiens GN=ATP6V0A1 PE=1 SV=3	192	96.4	1.203	1.121	1.064	0.93	0.87
Q93045-2	Isoform 2 of Stathmin-2 OS=Homo sapiens GN=STMN2	72	21.8	1.051	0.952	0.865	0.699	0.838
Q93034	Cullin-5 OS=Homo sapiens GN=CUL5 PE=1 SV=4	42	90.9	0.904	0.913	0.938	0.973	0.964
Q93008	Probable ubiquitin carboxyl-terminal hydrolase FAF-X OS=Homo sapiens GN=USP9X PE=1 SV=3	58	292.1	0.774	0.84	0.874	0.833	0.772
Q92982	Ninjurin-1 OS=Homo sapiens GN=NINJ1 PE=1 SV=2	4	16.3	1.268	1.29	1.333	1.519	1.365
Q92953	Potassium voltage-gated channel subfamily B member 2 OS=Homo sapiens GN=KCNB2 PE=2 SV=2	2	102.5	0.807	1.013	0.692	0.518	0.562
Q92934	Bcl2-associated agonist of cell death OS=Homo sapiens GN=BAD PE=1 SV=3	6	18.4	0.962	1.042	0.915	0.971	0.977
Q92932	Receptor-type tyrosine-protein phosphatase N2 OS=Homo sapiens GN=PTPRN2 PE=1 SV=2	35	111.2	1.094	0.972	1.044	0.96	0.868
Q92930	Ras-related protein Rab-8B OS=Homo sapiens GN=RAB8B PE=1 SV=2	87	23.6	1.169	1.089	1.125	1.02	1.093
Q92917	G patch domain and KOW motifs-containing protein OS=Homo sapiens GN=GPKOW PE=1 SV=2	2	52.2
Q92905	COP9 signalosome complex subunit 5 OS=Homo sapiens GN=COPS5 PE=1 SV=4	22	37.6	0.983	0.954	1.007	1.15	1.195
Q92900	Regulator of nonsense transcripts 1 OS=Homo sapiens GN=UPF1 PE=1 SV=2	42	124.3	1.003	0.979	0.974	0.903	0.877
Q92896-2	Isoform 2 of Golgi apparatus protein 1 OS=Homo sapiens GN=GLG1	32	137.1	0.97	1.176	1.127	1.223	1.142
Q92890-1	Isoform Long of Ubiquitin fusion degradation protein 1 homolog OS=Homo sapiens GN=UFD1L	6	38.7	0.841	0.854	0.902	0.976	0.981
Q92878-2	Isoform 2 of DNA repair protein RAD50 OS=Homo sapiens GN=RAD50	6	154.5	0.487	0.672	0.526	0.555	0.454
Q92859	Neogenin OS=Homo sapiens GN=NEO1 PE=1 SV=2	42	159.9	1.043	1.058	1.049	1.084	1.146
Q92845	Kinesin-associated protein 3 OS=Homo sapiens GN=KIFAP3 PE=1 SV=2	16	91.1	0.817	0.897	0.814	0.866	0.671
Q92843-2	Isoform 3 of Bcl-2-like protein 2 OS=Homo sapiens GN=BCL2L2	10	37.1	0.891	0.939	1.001	0.865	0.876
Q92823-5	Isoform 5 of Neuronal cell adhesion molecule OS=Homo sapiens GN=NRCAM	245	144.3	1.081	1.037	1.004	1.06	1.058
Q92806	G protein-activated inward rectifier potassium channel 3 OS=Homo sapiens GN=KCNJ9 PE=2 SV=2	4	44	0.716	0.923	0.944	0.74	0.664
Q92804	TATA-binding protein-associated factor 2N OS=Homo sapiens GN=TAF15 PE=1 SV=1	25	61.8	0.846	0.959	0.915	0.938	0.911
Q92783	Signal transducing adapter molecule 1 OS=Homo sapiens GN=STAM PE=1 SV=3	37	59.1	0.804	0.854	0.728	0.741	0.767
Q92769	Histone deacetylase 2 OS=Homo sapiens GN=HDAC2 PE=1 SV=2	13	55.3	0.869	0.917	0.943	0.907	0.798
Q92747	Actin-related protein 2/3 complex subunit 1A OS=Homo sapiens GN=ARPC1A PE=1 SV=2	33	41.5	0.818	0.853	0.847	0.88	0.883
Q92743	Serine protease HTRA1 OS=Homo sapiens GN=HTRA1 PE=1 SV=1	16	51.3	1.087	1.05	1.176	1.413	1.208
Q92736-2	Isoform 2 of Ryanodine receptor 2 OS=Homo sapiens GN=RYR2	173	565.1	0.87	0.969	0.935	0.898	0.802
Q92696	Geranylgeranyl transferase type-2 subunit alpha OS=Homo sapiens GN=RABGGTA PE=1 SV=2	26	65	1.058	0.918	1.087	0.916	1.002
Q92692	Nectin-2 OS=Homo sapiens GN=NECTIN2 PE=1 SV=1	4	57.7	1.003	1.226	1.106	1.352	1.14
Q92688	Acidic leucine-rich nuclear phosphoprotein 32 family member B OS=Homo sapiens GN=ANP32B PE=1 SV=1	16	28.8	1.236	1.275	1.298	1.525	1.621
Q92665	28S ribosomal protein S31, mitochondrial OS=Homo sapiens GN=MRPS31 PE=1 SV=3	8	45.3	0.673	0.83	0.732	0.624	0.612
Q92643	GPI-anchor transamidase OS=Homo sapiens GN=PIGK PE=1 SV=2	2	45.2	1.687	2.911	1.935	4.044	1.894
Q92629-2	Isoform 2 of Delta-sarcoglycan OS=Homo sapiens GN=SGCD	2	32.2	1.416	1.063	1.003	1.067	1.15
Q92625	Ankyrin repeat and SAM domain-containing protein 1A OS=Homo sapiens GN=ANKS1A PE=1 SV=4	8	123	2.145	0.72	1.697	0.855	1.343
Q92623	Tetratricopeptide repeat protein 9A OS=Homo sapiens GN=TTC9 PE=1 SV=3	8	24.4	1.496	1.361	1.368	1.814	1.661
Q92621	Nuclear pore complex protein Nup205 OS=Homo sapiens GN=NUP205 PE=1 SV=3	8	227.8	1.353	1.149	1.129	0.99	1.05
Q92615	La-related protein 4B OS=Homo sapiens GN=LARP4B PE=1 SV=3	1	80.5	2.513	1.644	2.089	1.471	2.197
Q92614	Unconventional myosin-XVIIIa OS=Homo sapiens GN=MYO18A PE=1 SV=3	116	233	0.989	1.011	0.988	0.958	0.94
Q92609-2	Isoform 2 of TBC1 domain family member 5 OS=Homo sapiens GN=TBC1D5	20	91.2	0.868	0.874	0.884	0.824	0.867
Q92604	Acyl-CoA:lysophosphatidylglycerol acyltransferase 1 OS=Homo sapiens GN=LPGAT1 PE=1 SV=1	2	43.1	0.895	0.926	0.819	0.727	0.594
Q92600-2	Isoform 2 of Cell differentiation protein RCD1 homolog OS=Homo sapiens GN=RQCD1	1	36.8	1.083	1.289	1.148	1.062	1.126
Q92599-4	Isoform 4 of Septin-8 OS=Homo sapiens GN=SEPT8	115	51.1	1.03	1.048	1.121	1.306	1.286
Q92599	Septin-8 OS=Homo sapiens GN=SEPT8 PE=1 SV=4	115	55.7	0.856	0.926	0.892	1.137	1.018
Q92581-3	Isoform 3 of Sodium/hydrogen exchanger 6 OS=Homo sapiens GN=SLC9A6	35	72.2	1.049	1.113	1.074	1.093	0.899
Q92581-2	Isoform 2 of Sodium/hydrogen exchanger 6 OS=Homo sapiens GN=SLC9A6	41	77.9	0.794	0.883	0.824	0.773	0.727
Q92575	UBX domain-containing protein 4 OS=Homo sapiens GN=UBXN4 PE=1 SV=2	10	56.7	1.043	1.134	1.098	0.981	1.154
Q92561	Phytanoyl-CoA hydroxylase-interacting protein OS=Homo sapiens GN=PHYHIP PE=1 SV=1	33	37.5	0.811	0.849	0.927	1.144	0.881
Q92558	Wiskott-Aldrich syndrome protein family member 1 OS=Homo sapiens GN=WASF1 PE=1 SV=1	61	61.6	1.007	0.914	0.928	0.769	0.734
Q92556	Engulfment and cell motility protein 1 OS=Homo sapiens GN=ELMO1 PE=1 SV=2	20	83.8	1.124	1.1	1.081	1.159	1.408
Q92552-2	Isoform 2 of 28S ribosomal protein S27, mitochondrial OS=Homo sapiens GN=MRPS27	20	49.1	0.922	1.028	0.891	0.796	0.744
Q92551	Inositol hexakisphosphate kinase 1 OS=Homo sapiens GN=IP6K1 PE=1 SV=3	4	50.2	1.076	1.039	1.157	1.184	1.04
Q92542	Nicastrin OS=Homo sapiens GN=NCSTN PE=1 SV=2	18	78.4	1.079	1.144	0.949	0.924	0.923
Q92540-4	Isoform 4 of Protein SMG7 OS=Homo sapiens GN=SMG7	2	131.6	0.882	0.968	0.842	0.726	0.527
Q92538	Golgi-specific brefeldin A-resistance guanine nucleotide exchange factor 1 OS=Homo sapiens GN=GBF1 PE=1 SV=2	12	206.3	0.698	0.78	0.689	0.627	0.518
Q92529	SHC-transforming protein 3 OS=Homo sapiens GN=SHC3 PE=1 SV=1	21	64	0.997	0.983	1.075	1.045	1.023
Q92526	T-complex protein 1 subunit zeta-2 OS=Homo sapiens GN=CCT6B PE=1 SV=5	16	57.8
Q92522	Histone H1x OS=Homo sapiens GN=H1FX PE=1 SV=1	28	22.5	1.263	1.106	1.147	1.27	1.188
Q92520	Protein FAM3C OS=Homo sapiens GN=FAM3C PE=1 SV=1	14	24.7	0.994	1.14	1.065	1.096	1.011
Q92508	Piezo-type mechanosensitive ion channel component 1 OS=Homo sapiens GN=PIEZO1 PE=1 SV=4	6	286.6	0.855	1.01	0.866	1.02	0.967
Q92506	Estradiol 17-beta-dehydrogenase 8 OS=Homo sapiens GN=HSD17B8 PE=1 SV=2	16	27	0.946	1.077	0.898	0.982	0.882
Q92499	ATP-dependent RNA helicase DDX1 OS=Homo sapiens GN=DDX1 PE=1 SV=2	63	82.4	0.823	0.886	0.887	0.794	0.867
Q8WZA9	Immunity-related GTPase family Q protein OS=Homo sapiens GN=IRGQ PE=1 SV=1	50	62.7	0.915	0.914	0.876	0.771	0.901
Q8WZA2	Rap guanine nucleotide exchange factor 4 OS=Homo sapiens GN=RAPGEF4 PE=1 SV=1	14	115.4	0.785	0.852	0.774	0.67	0.544
Q8WZA0-2	Isoform 2 of Protein LZIC OS=Homo sapiens GN=LZIC	17	23.9	0.909	0.974	0.995	1.491	1.303
Q8WZ64	Arf-GAP with Rho-GAP domain, ANK repeat and PH domain-containing protein 2 OS=Homo sapiens GN=ARAP2 PE=1 SV=3	2	193.3
Q8WYP5-2	Isoform 2 of Protein ELYS OS=Homo sapiens GN=AHCTF1	3	255.8	1.089	1.164	1.034	1.03	1.103
Q8WYK1	Contactin-associated protein-like 5 OS=Homo sapiens GN=CNTNAP5 PE=2 SV=1	12	145.5	1.214	1.049	1.065	1.016	0.869
Q8WY91	THAP domain-containing protein 4 OS=Homo sapiens GN=THAP4 PE=1 SV=2	2	62.9	1.271	1.299	0.914	1.418	0.989
Q8WY54	Protein phosphatase 1E OS=Homo sapiens GN=PPM1E PE=1 SV=2	12	84.9	0.712	0.829	0.753	0.612	0.587
Q8WY22	BRI3-binding protein OS=Homo sapiens GN=BRI3BP PE=1 SV=1	6	27.8	0.642	0.89	0.831	0.765	0.78
Q8WY21-2	Isoform 2 of VPS10 domain-containing receptor SorCS1 OS=Homo sapiens GN=SORCS1	4	133.3	0.41	0.519	0.479	0.585	0.503
Q8WY07	Cationic amino acid transporter 3 OS=Homo sapiens GN=SLC7A3 PE=1 SV=1	2	67.1
Q8WXX5	DnaJ homolog subfamily C member 9 OS=Homo sapiens GN=DNAJC9 PE=1 SV=1	4	29.9	1.042	1.164	1.221	1.628	1.356
Q8WXS5	Voltage-dependent calcium channel gamma-8 subunit OS=Homo sapiens GN=CACNG8 PE=2 SV=3	13	43.3	0.966	0.791	0.842	0.578	0.723
Q8WXS3	Brain and acute leukemia cytoplasmic protein OS=Homo sapiens GN=BAALC PE=2 SV=3	10	19.2	1.649	1.182	1.211	1.009	1.262
Q8WXP9	Oxysterol-binding protein OS=Homo sapiens GN=OSBPL7 PE=2 SV=1	2	95.4	0.995	0.987	1.134	1.221	1.484
Q8WXI2	Connector enhancer of kinase suppressor of ras 2 OS=Homo sapiens GN=CNKSR2 PE=1 SV=1	9	117.5	0.772	0.792	0.868	0.866	0.72
Q8WXH2	Junctophilin-3 OS=Homo sapiens GN=JPH3 PE=2 SV=2	2	81.4	0.898	0.954	0.848	0.993	0.873
Q8WXH0-2	Isoform 2 of Nesprin-2 OS=Homo sapiens GN=SYNE2	2	798.4	1.398	1.081	1.243	1.041	1.118
Q8WXG6-4	Isoform 4 of MAP kinase-activating death domain protein OS=Homo sapiens GN=MADD	58	173.3	1.023	1.078	1.018	1.023	0.81
Q8WXG6	MAP kinase-activating death domain protein OS=Homo sapiens GN=MADD PE=1 SV=2	60	183.2	0.838	0.881	0.809	0.768	0.663
Q8WXF1	Paraspeckle component 1 OS=Homo sapiens GN=PSPC1 PE=1 SV=1	28	58.7	0.893	0.98	0.906	0.785	0.762
Q8WXE9-3	Isoform 2 of Stonin-2 OS=Homo sapiens GN=STON2	10	102.8	1.039	0.884	1	1.143	1.02
Q8WXE0	Caskin-2 OS=Homo sapiens GN=CASKIN2 PE=1 SV=2	5	126.7
Q8WXD9	Caskin-1 OS=Homo sapiens GN=CASKIN1 PE=1 SV=1	68	149.7	0.919	0.98	0.882	0.8	0.74
Q8WXD2	Secretogranin-3 OS=Homo sapiens GN=SCG3 PE=1 SV=3	31	53	1.361	1.176	1.297	1.108	0.998
Q8WXA9-2	Isoform 2 of Splicing regulatory glutamine/lysine-rich protein 1 OS=Homo sapiens GN=SREK1	2	71.6
Q8WXA3	RUN and FYVE domain-containing protein 2 OS=Homo sapiens GN=RUFY2 PE=1 SV=2	9	75	0.994	0.912	0.822	0.861	0.78
Q8WX93	Palladin OS=Homo sapiens GN=PALLD PE=1 SV=3	4	150.5	0.967	0.823	1.106	1.444	1.046
Q8WWZ7	ATP-binding cassette sub-family A member 5 OS=Homo sapiens GN=ABCA5 PE=2 SV=2	4	186.4	0.676	0.773	0.72	0.785	0.635
Q8WWX9	Selenoprotein M OS=Homo sapiens GN=SELM PE=1 SV=3	8	16.2	1.072	1.063	1.031	1.073	0.997
Q8WWV3	Reticulon-4-interacting protein 1, mitochondrial OS=Homo sapiens GN=RTN4IP1 PE=1 SV=2	10	43.6	0.959	0.977	0.87	0.611	0.677
Q8WWT9	Solute carrier family 13 member 3 OS=Homo sapiens GN=SLC13A3 PE=1 SV=1	2	66.8
Q8WWM7-3	Isoform 3 of Ataxin-2-like protein OS=Homo sapiens GN=ATXN2L	20	115.5	0.912	1.007	0.884	0.849	0.872
Q8WWI5	Choline transporter-like protein 1 OS=Homo sapiens GN=SLC44A1 PE=1 SV=1	52	73.3	1.258	1.253	1.235	1.427	1.826
Q8WWI1	LIM domain only protein 7 OS=Homo sapiens GN=LMO7 PE=1 SV=3	58	192.6	0.834	0.838	0.748	0.749	0.67
Q8WWC4	m-AAA protease-interacting protein 1, mitochondrial OS=Homo sapiens GN=C2orf47 PE=1 SV=1	8	32.5	0.823	0.95	0.881	0.753	0.824
Q8WW59	SPRY domain-containing protein 4 OS=Homo sapiens GN=SPRYD4 PE=1 SV=2	4	23.1	1.194	0.788	0.807	0.916	0.835
Q8WW22-2	Isoform 2 of DnaJ homolog subfamily A member 4 OS=Homo sapiens GN=DNAJA4	20	47.9	1.229	1.085	1.115	1.008	0.975
Q8WW12	PEST proteolytic signal-containing nuclear protein OS=Homo sapiens GN=PCNP PE=1 SV=2	10	18.9	0.922	1.003	0.926	0.896	1.164
Q8WVY7	Ubiquitin-like domain-containing CTD phosphatase 1 OS=Homo sapiens GN=UBLCP1 PE=1 SV=2	6	36.8	0.794	0.826	0.844	0.798	0.837
Q8WVX7	Ribosomal protein S19 (Fragment) OS=Homo sapiens PE=2 SV=1	45	17.3	1.072	1.151	1.006	0.978	1.049
Q8WVT3	Trafficking protein particle complex subunit 12 OS=Homo sapiens GN=TRAPPC12 PE=1 SV=3	4	79.3	0.797	0.966	0.929	0.739	0.827
Q8WVR3	Uncharacterized protein C7orf43 OS=Homo sapiens GN=C7orf43 PE=1 SV=2	2	62.6
Q8WVH0	Complexin-3 OS=Homo sapiens GN=CPLX3 PE=2 SV=1	4	17.5	1.236	1.095	1.093	1.214	0.998
Q8WVF5	BTB/POZ domain-containing protein KCTD4 OS=Homo sapiens GN=KCTD4 PE=2 SV=2	4	29.9	0.706	0.72	0.764	0.763	0.908
Q8WVF1	Protein OSCP1 OS=Homo sapiens GN=OSCP1 PE=1 SV=4	6	44.6	0.919	0.892	0.932	0.907	0.888
Q8WVC6	Dephospho-CoA kinase domain-containing protein OS=Homo sapiens GN=DCAKD PE=1 SV=1	2	26.5	1.037	1.038	1.035	0.991	1.009
Q8WUY8	N-acetyltransferase 14 OS=Homo sapiens GN=NAT14 PE=1 SV=1	2	21.6	0.616	0.77	0.595	0.634	0.517
Q8WUY3-3	Isoform 3 of Protein prune homolog 2 OS=Homo sapiens GN=PRUNE2	23	340.9	1.036	1.044	0.962	0.833	0.868
Q8WUY1	Protein THEM6 OS=Homo sapiens GN=THEM6 PE=1 SV=2	12	23.9	1.039	1.183	1.024	1.067	1.193
Q8WUW1-2	Isoform 2 of Protein BRICK1 OS=Homo sapiens GN=BRK1	19	12	0.704	0.725	0.722	0.841	0.725
Q8WUR7	UPF0235 protein C15orf40 OS=Homo sapiens GN=C15orf40 PE=1 SV=2	4	16.3	0.952	1.058	1.001	1.007	1.015
Q8WUN7	Ubiquitin domain-containing protein 2 OS=Homo sapiens GN=UBTD2 PE=1 SV=2	4	26.2	0.823	0.938	0.909	0.926	0.933
Q8WUM0	Nuclear pore complex protein Nup133 OS=Homo sapiens GN=NUP133 PE=1 SV=2	6	128.9	0.913	1.046	0.911	0.863	0.929
Q8WUK0	Phosphatidylglycerophosphatase and protein-tyrosine phosphatase 1 OS=Homo sapiens GN=PTPMT1 PE=1 SV=1	4	22.8	0.793	0.905	0.796	0.762	0.706
Q8WUH6	Transmembrane protein 263 OS=Homo sapiens GN=TMEM263 PE=1 SV=1	4	11.7	0.94	0.661	0.785	0.707	0.62
Q8WUH2	Transforming growth factor-beta receptor-associated protein 1 OS=Homo sapiens GN=TGFBRAP1 PE=1 SV=1	4	97.1	0.876	0.941	0.943	0.83	0.764
Q8WUD1	Ras-related protein Rab-2B OS=Homo sapiens GN=RAB2B PE=1 SV=1	71	24.2	1.095	1.084	1.041	1.052	1.084
Q8WUA4	General transcription factor 3C polypeptide 2 OS=Homo sapiens GN=GTF3C2 PE=1 SV=2	4	100.6	0.949	1.033	0.968	0.995	0.839
Q8WU90	Zinc finger CCCH domain-containing protein 15 OS=Homo sapiens GN=ZC3H15 PE=1 SV=1	4	48.6	0.879	0.944	0.885	0.779	0.87
Q8WU79	Stromal membrane-associated protein 2 OS=Homo sapiens GN=SMAP2 PE=1 SV=1	14	46.8	0.882	0.938	0.834	0.807	0.751
Q8WU76	Sec1 family domain-containing protein 2 OS=Homo sapiens GN=SCFD2 PE=1 SV=2	4	75.1	0.801	0.901	0.924	0.853	0.802
Q8WTX7	GATS-like protein 3 OS=Homo sapiens GN=GATSL3 PE=1 SV=1	3	36.3
Q8WTW4	Nitrogen permease regulator 2-like protein OS=Homo sapiens GN=NPRL2 PE=1 SV=2	2	43.6
Q8WTS6	Histone-lysine N-methyltransferase SETD7 OS=Homo sapiens GN=SETD7 PE=1 SV=1	12	40.7	1.144	1.114	1.087	1.212	1.477
Q8TF74	WAS/WASL-interacting protein family member 2 OS=Homo sapiens GN=WIPF2 PE=1 SV=1	21	46.3	0.993	0.975	0.973	0.828	0.9
Q8TF61	F-box only protein 41 OS=Homo sapiens GN=FBXO41 PE=2 SV=5	26	94.4	0.849	0.9	0.827	0.752	0.633
Q8TF44	C2 calcium-dependent domain-containing protein 4C OS=Homo sapiens GN=C2CD4C PE=1 SV=2	14	44.5	0.866	0.755	0.778	0.674	0.54
Q8TF39	Zinc finger protein 483 OS=Homo sapiens GN=ZNF483 PE=1 SV=3	7	85	0.937	0.862	0.846	0.854	0.788
Q8TF21-2	Isoform 2 of Ankyrin repeat domain-containing protein 24 OS=Homo sapiens GN=ANKRD24	8	132.3	0.86	0.642	0.621	0.666	0.544
Q8TF05	Serine/threonine-protein phosphatase 4 regulatory subunit 1 OS=Homo sapiens GN=PPP4R1 PE=1 SV=1	1	106.9
Q8TEY4	Adaptor protein FE65a2 (Fragment) OS=Homo sapiens GN=APBB1 PE=2 SV=1	8	77.4	0.671	0.783	0.723	0.879	0.84
Q8TEV9	Smith-Magenis syndrome chromosomal region candidate gene 8 protein OS=Homo sapiens GN=SMCR8 PE=1 SV=2	3	105	1.081	1.041	1.036	0.841	0.745
Q8TEQ6	Gem-associated protein 5 OS=Homo sapiens GN=GEMIN5 PE=1 SV=3	4	168.5	0.938	0.893	0.857	0.928	0.833
Q8TEQ0	Sorting nexin-29 OS=Homo sapiens GN=SNX29 PE=1 SV=3	2	91.2	0.916	0.784	0.808	0.824	0.762
Q8TEH3-7	Isoform 7 of DENN domain-containing protein 1A OS=Homo sapiens GN=DENND1A	16	110.9	1.011	1.011	0.993	0.926	0.871
Q8TE68	Epidermal growth factor receptor kinase substrate 8-like protein 1 OS=Homo sapiens GN=EPS8L1 PE=1 SV=3	1	80.2	0.404	0.391	0.31	0.402	0.466
Q8TE49-2	Isoform 2 of OTU domain-containing protein 7A OS=Homo sapiens GN=OTUD7A	7	101.4	1.157	0.926	1.216	0.842	0.946
Q8TDY2	RB1-inducible coiled-coil protein 1 OS=Homo sapiens GN=RB1CC1 PE=1 SV=3	11	183	1.014	0.996	1.103	1.071	0.878
Q8TDW7	Protocadherin Fat 3 OS=Homo sapiens GN=FAT3 PE=2 SV=2	2	505.2	1.011	1.158	1.082	1.001	0.893
Q8TDW0	Volume-regulated anion channel subunit LRRC8C OS=Homo sapiens GN=LRRC8C PE=1 SV=2	2	92.4	0.733	0.754	0.607	0.655	0.636
Q8TDV0	Probable G-protein coupled receptor 151 OS=Homo sapiens GN=GPR151 PE=2 SV=1	2	46.6	1.391	1.119	1.28	1.104	1.001
Q8TDQ7	Glucosamine-6-phosphate isomerase 2 OS=Homo sapiens GN=GNPDA2 PE=1 SV=1	14	31.1	1.218	1.092	1.211	0.926	1.05
Q8TDN6	Ribosome biogenesis protein BRX1 homolog OS=Homo sapiens GN=BRIX1 PE=1 SV=2	2	41.4	0.997	0.935	1.124	0.98	0.954
Q8TDJ6-3	Isoform 3 of DmX-like protein 2 OS=Homo sapiens GN=DMXL2	154	339.5	0.803	0.873	0.823	0.757	0.668
Q8TDJ5	Tyrosine-protein kinase receptor OS=Homo sapiens GN=TFG/ALK fusion PE=2 SV=1	28	88.6	0.958	0.995	0.944	0.925	0.958
Q8TDG2	Actin-related protein T1 OS=Homo sapiens GN=ACTRT1 PE=2 SV=2	2	41.7	1.183	1.004	1.128	1.227	1.346
Q8TDC3-2	Isoform 2 of Serine/threonine-protein kinase BRSK1 OS=Homo sapiens GN=BRSK1	32	86.7	0.906	0.951	0.837	0.74	0.722
Q8TD55	Pleckstrin homology domain-containing family O member 2 OS=Homo sapiens GN=PLEKHO2 PE=1 SV=1	11	53.3	1.08	1.031	1.127	1.162	1.166
Q8TD43	Transient receptor potential cation channel subfamily M member 4 OS=Homo sapiens GN=TRPM4 PE=1 SV=1	2	134.2	0.88	0.854	0.891	0.991	0.872
Q8TD22	Sideroflexin-5 OS=Homo sapiens GN=SFXN5 PE=1 SV=1	18	37.1	0.594	0.845	0.731	0.83	0.661
Q8TD16-2	Isoform 2 of Protein bicaudal D homolog 2 OS=Homo sapiens GN=BICD2	4	96.7	1.075	0.939	1.078	0.948	0.943
Q8TCZ8	Apolipoprotein E (Fragment) OS=Homo sapiens GN=APOE PE=4 SV=1	23	6.7	2.647	1.221	3.609	1.2	4.958
Q8TCZ2-5	Isoform 5 of CD99 antigen-like protein 2 OS=Homo sapiens GN=CD99L2	18	28.9	0.732	0.975	0.821	1.123	0.971
Q8TCZ2-3	Isoform 3 of CD99 antigen-like protein 2 OS=Homo sapiens GN=CD99L2	18	20.3	0.959	0.816	0.664	0.374	0.333
Q8TCU6	Phosphatidylinositol 3,4,5-trisphosphate-dependent Rac exchanger 1 protein OS=Homo sapiens GN=PREX1 PE=1 SV=3	20	186.1	1.082	1.044	1.059	1.242	1.189
Q8TCT9-2	Isoform 2 of Minor histocompatibility antigen H13 OS=Homo sapiens GN=HM13	16	46.8	1.295	1.302	1.257	1.212	1.258
Q8TCS8	Polyribonucleotide nucleotidyltransferase 1, mitochondrial OS=Homo sapiens GN=PNPT1 PE=1 SV=2	20	85.9	0.8	0.922	0.858	0.737	0.72
Q8TCJ2	Dolichyl-diphosphooligosaccharide--protein glycosyltransferase subunit STT3B OS=Homo sapiens GN=STT3B PE=1 SV=1	9	93.6	0.798	0.887	0.798	0.809	0.81
Q8TCG5	Carnitine O-palmitoyltransferase 1, brain isoform OS=Homo sapiens GN=CPT1C PE=1 SV=1	4	90.9	0.887	0.944	0.884	0.913	0.791
Q8TCF1	AN1-type zinc finger protein 1 OS=Homo sapiens GN=ZFAND1 PE=1 SV=1	2	30.8	0.591	0.582	0.573	0.615	0.308
Q8TCD5	5'(3')-deoxyribonucleotidase, cytosolic type OS=Homo sapiens GN=NT5C PE=1 SV=2	10	23.4	0.968	0.917	1.059	1.155	1.22
Q8TCD1	UPF0729 protein C18orf32 OS=Homo sapiens GN=C18orf32 PE=3 SV=1	12	8.7	1.404	1.427	1.163	1.042	1.287
Q8TCD0	Uncharacterized protein OS=Homo sapiens PE=1 SV=1	64	26.2	1.507	0.893	1.334	1.321	1.755
Q8TCC3-2	Isoform 2 of 39S ribosomal protein L30, mitochondrial OS=Homo sapiens GN=MRPL30	2	21.8	0.752	1.083	0.916	0.903	1.133
Q8TC26	Transmembrane protein 163 OS=Homo sapiens GN=TMEM163 PE=2 SV=1	15	31.4	0.914	1.03	0.832	0.713	0.628
Q8TC12	Retinol dehydrogenase 11 OS=Homo sapiens GN=RDH11 PE=1 SV=2	20	35.4	0.896	0.943	0.926	0.862	0.979
Q8TC07-3	Isoform 3 of TBC1 domain family member 15 OS=Homo sapiens GN=TBC1D15	14	78.5	0.911	0.903	0.908	0.978	0.896
Q8TC05	Nuclear protein MDM1 OS=Homo sapiens GN=MDM1 PE=1 SV=2	1	80.7	0.197	0.647	0.49	0.714	0.481
Q8TBX8	Phosphatidylinositol 5-phosphate 4-kinase type-2 gamma OS=Homo sapiens GN=PIP4K2C PE=1 SV=3	24	47.3	0.824	0.837	0.812	0.778	0.64
Q8TBP6	Solute carrier family 25 member 40 OS=Homo sapiens GN=SLC25A40 PE=1 SV=1	2	38.1	0.869	1.297	0.942	0.91	1.004
Q8TBM8	DnaJ homolog subfamily B member 14 OS=Homo sapiens GN=DNAJB14 PE=1 SV=1	8	42.5	0.994	1.049	1.13	1.291	1.686
Q8TBJ7	Kelch-like 1 (Drosophila) OS=Homo sapiens GN=KLHL1 PE=2 SV=1	2	82.6	0.807	0.783	0.853	0.868	0.812
Q8TBG9-2	Isoform 2 of Synaptoporin OS=Homo sapiens GN=SYNPR	25	31.3	1.028	0.978	1.071	1.083	0.887
Q8TBF8	Protein FAM81A OS=Homo sapiens GN=FAM81A PE=2 SV=3	4	42.4	0.762	0.761	0.834	0.693	0.493
Q8TBF4	Zinc finger CCHC-type and RNA-binding motif-containing protein 1 OS=Homo sapiens GN=ZCRB1 PE=1 SV=2	2	24.6
Q8TBC5-3	Isoform 3 of Zinc finger and SCAN domain-containing protein 18 OS=Homo sapiens GN=ZSCAN18	14	60.8	1.172	1.01	1.071	0.864	0.812
Q8TBB6	Probable cationic amino acid transporter OS=Homo sapiens GN=SLC7A14 PE=2 SV=3	30	84	1.064	1.047	1.092	0.978	0.903
Q8TB96	T-cell immunomodulatory protein OS=Homo sapiens GN=ITFG1 PE=1 SV=1	12	68.1	0.954	1.084	0.95	0.999	1.025
Q8TB92	3-hydroxymethyl-3-methylglutaryl-CoA lyase, cytoplasmic OS=Homo sapiens GN=HMGCLL1 PE=1 SV=3	2	39.5
Q8TB37	Iron-sulfur protein NUBPL OS=Homo sapiens GN=NUBPL PE=1 SV=3	8	34.1	0.791	0.848	0.765	0.768	0.62
Q8TB36	Ganglioside-induced differentiation-associated protein 1 OS=Homo sapiens GN=GDAP1 PE=1 SV=3	75	41.3	0.927	1.032	0.969	0.792	0.78
Q8TB22-2	Isoform 2 of Spermatogenesis-associated protein 20 OS=Homo sapiens GN=SPATA20	10	89.7	1.025	1.101	1.034	0.836	0.78
Q8TAT6-2	Isoform 2 of Nuclear protein localization protein 4 homolog OS=Homo sapiens GN=NPLOC4	24	69.4	1.024	0.977	1.016	0.881	1.013
Q8TAM9	Intercellular adhesion molecule 5, telencephalin OS=Homo sapiens GN=ICAM5 PE=2 SV=1	107	97.1	1.108	1.035	1.182	1.073	0.982
Q8TAM6-2	Isoform 2 of Ermin OS=Homo sapiens GN=ERMN	97	34.3	1.341	1.158	1.165	1.312	1.87
Q8TAE8	Growth arrest and DNA damage-inducible proteins-interacting protein 1 OS=Homo sapiens GN=GADD45GIP1 PE=1 SV=1	10	25.4	0.917	1.014	0.965	0.785	0.85
Q8TAE6	Protein phosphatase 1 regulatory subunit 14C OS=Homo sapiens GN=PPP1R14C PE=1 SV=3	3	17.8	1.231	1.373	1.684	1.102	1.614
Q8TAC9-2	Isoform 2 of Secretory carrier-associated membrane protein 5 OS=Homo sapiens GN=SCAMP5	36	26.8	0.684	0.903	0.701	0.685	0.551
Q8TAB3	Protocadherin-19 OS=Homo sapiens GN=PCDH19 PE=1 SV=3	4	126.2	1.166	1.035	1.111	0.973	1.051
Q8TA92	Similar to AFG3 ATPase family gene 3-like 2 (Yeast) (Fragment) OS=Homo sapiens PE=2 SV=1	102	90.1	0.855	1.035	0.882	0.785	0.794
Q8NI60	Atypical kinase COQ8A, mitochondrial OS=Homo sapiens GN=COQ8A PE=1 SV=1	8	71.9	0.905	0.976	0.82	0.773	0.685
Q8NI37	Protein phosphatase PTC7 homolog OS=Homo sapiens GN=PPTC7 PE=2 SV=1	8	32.6	0.75	1.048	0.791	0.62	0.742
Q8NI27	THO complex subunit 2 OS=Homo sapiens GN=THOC2 PE=1 SV=2	4	182.7	1.119	1.006	1.133	0.889	0.789
Q8NI22	Multiple coagulation factor deficiency protein 2 OS=Homo sapiens GN=MCFD2 PE=1 SV=1	1	16.4
Q8NI08	Nuclear receptor coactivator 7 OS=Homo sapiens GN=NCOA7 PE=1 SV=2	44	106.1	1.7	1.612	1.59	1.002	0.634
Q8NHP8	Putative phospholipase B-like 2 OS=Homo sapiens GN=PLBD2 PE=1 SV=2	3	65.4	1.008	1.008	1.251	1.45	1.418
Q8NHP6	Motile sperm domain-containing protein 2 OS=Homo sapiens GN=MOSPD2 PE=1 SV=1	10	59.7	1.356	1.335	1.332	1.154	1.72
Q8NHH9	Atlastin-2 OS=Homo sapiens GN=ATL2 PE=1 SV=2	10	66.2	1.528	1.319	1.278	1.001	1.289
Q8NHG7	Small VCP/p97-interacting protein OS=Homo sapiens GN=SVIP PE=1 SV=1	19	8.4	1.287	1.286	1.306	1.261	1.617
Q8NG68	Tubulin--tyrosine ligase OS=Homo sapiens GN=TTL PE=1 SV=2	5	43.2	0.97	0.922	0.884	0.836	0.89
Q8NG11	Tetraspanin-14 OS=Homo sapiens GN=TSPAN14 PE=1 SV=1	2	30.7	0.961	1.081	1.142	1.155	1.244
Q8NFZ8	Cell adhesion molecule 4 OS=Homo sapiens GN=CADM4 PE=1 SV=1	65	42.8	1.223	1.17	1.14	1.195	1.548
Q8NFZ4	Neuroligin-2 OS=Homo sapiens GN=NLGN2 PE=1 SV=1	25	90.8	0.914	1.006	1.014	0.978	0.9
Q8NFX7	Syntaxin-binding protein 6 OS=Homo sapiens GN=STXBP6 PE=1 SV=2	10	23.5	1.482	1.108	0.913	0.907	1.051
Q8NFW9	Rab effector MyRIP OS=Homo sapiens GN=MYRIP PE=1 SV=2	7	95.6	1.018	1.35	0.985	0.828	0.716
Q8NFV4	Protein ABHD11 OS=Homo sapiens GN=ABHD11 PE=1 SV=1	8	34.7	0.653	0.885	0.724	0.68	0.674
Q8NFU3-4	Isoform 4 of Thiosulfate sulfurtransferase/rhodanese-like domain-containing protein 1 OS=Homo sapiens GN=TSTD1	4	13.2	1.151	0.924	1.027	0.876	0.854
Q8NFP4-2	Isoform 2 of MAM domain-containing glycosylphosphatidylinositol anchor protein 1 OS=Homo sapiens GN=MDGA1	2	107.3
Q8NFH9	MLL/SEPTIN6 fusion protein (Fragment) OS=Homo sapiens PE=2 SV=1	90	63.1	1.025	1.161	1.024	0.737	0.7
Q8NFH8	RalBP1-associated Eps domain-containing protein 2 OS=Homo sapiens GN=REPS2 PE=1 SV=2	43	71.5	1.011	0.952	0.986	0.853	0.874
Q8NFH4	Nucleoporin Nup37 OS=Homo sapiens GN=NUP37 PE=1 SV=1	4	36.7	1.081	1.054	1.102	1.14	1.268
Q8NFF5	FAD synthase OS=Homo sapiens GN=FLAD1 PE=1 SV=1	6	65.2	1.056	1.045	0.945	0.9	0.885
Q8NFD5-3	Isoform 3 of AT-rich interactive domain-containing protein 1B OS=Homo sapiens GN=ARID1B	2	241.3	0.855	0.785	0.877	0.756	0.929
Q8NFC6	Biorientation of chromosomes in cell division protein 1-like 1 OS=Homo sapiens GN=BOD1L1 PE=1 SV=2	6	330.3	1.19	1.22	1.136	0.89	0.943
Q8NFA0	Ubiquitin carboxyl-terminal hydrolase 32 OS=Homo sapiens GN=USP32 PE=1 SV=1	7	181.5	0.944	0.883	0.911	0.735	0.673
Q8NF91	Nesprin-1 OS=Homo sapiens GN=SYNE1 PE=1 SV=4	126	1010.5	0.794	0.848	0.836	0.775	0.635
Q8NF37	Lysophosphatidylcholine acyltransferase 1 OS=Homo sapiens GN=LPCAT1 PE=1 SV=2	10	59.1	0.933	0.901	0.878	0.662	0.621
Q8NF12	FLJ00390 protein (Fragment) OS=Homo sapiens GN=FLJ00390 PE=2 SV=1	24	35	0.995	1.053	1.328	2.909	1.705
Q8NEZ2	Vacuolar protein sorting-associated protein 37A OS=Homo sapiens GN=VPS37A PE=1 SV=1	2	44.3
Q8NEY8	Periphilin-1 OS=Homo sapiens GN=PPHLN1 PE=1 SV=2	2	52.7	0.847	1.088	0.833	0.965	0.721
Q8NEY1	Neuron navigator 1 OS=Homo sapiens GN=NAV1 PE=1 SV=2	24	202.3	1.002	0.903	0.932	0.865	0.825
Q8NEU8-3	Isoform 3 of DCC-interacting protein 13-beta OS=Homo sapiens GN=APPL2	11	75.1	0.902	0.908	0.936	1.035	0.95
Q8NEN9	PDZ domain-containing protein 8 OS=Homo sapiens GN=PDZD8 PE=1 SV=1	4	128.5	0.503	0.547	0.458	0.484	0.523
Q8NEL9	Phospholipase DDHD1 OS=Homo sapiens GN=DDHD1 PE=1 SV=2	6	100.4	0.784	0.825	0.709	0.739	0.66
Q8NEG7	Protein DENND6B OS=Homo sapiens GN=DENND6B PE=2 SV=1	2	66.4	1.069	0.99	1.159	1.055	0.814
Q8NEB9	Phosphatidylinositol 3-kinase catalytic subunit type 3 OS=Homo sapiens GN=PIK3C3 PE=1 SV=1	17	101.5	1.002	1.03	0.996	0.898	0.931
Q8NE86	Calcium uniporter protein, mitochondrial OS=Homo sapiens GN=MCU PE=1 SV=1	10	39.8	0.981	1.099	0.97	0.813	0.844
Q8NE71	ATP-binding cassette sub-family F member 1 OS=Homo sapiens GN=ABCF1 PE=1 SV=2	24	95.9	1.025	1.07	0.98	1.029	0.932
Q8NE35	Cytoplasmic polyadenylation element-binding protein 3 OS=Homo sapiens GN=CPEB3 PE=1 SV=2	8	76	0.804	0.882	0.726	0.757	0.79
Q8NE01	Metal transporter CNNM3 OS=Homo sapiens GN=CNNM3 PE=1 SV=1	4	76.1	1.089	1.106	1.098	1.036	1.067
Q8NDX6	Zinc finger protein 740 OS=Homo sapiens GN=ZNF740 PE=1 SV=1	2	21.8	0.986	0.745	1.029	1.2	0.848
Q8NDI1	EH domain-binding protein 1 OS=Homo sapiens GN=EHBP1 PE=1 SV=3	12	139.9	1.07	1.018	0.99	0.955	0.894
Q8NDH3	Probable aminopeptidase NPEPL1 OS=Homo sapiens GN=NPEPL1 PE=1 SV=3	6	55.8	1.531	1.217	1.481	1.396	1.768
Q8NDA8	Maestro heat-like repeat-containing protein family member 1 OS=Homo sapiens GN=MROH1 PE=2 SV=3	18	181.1	0.895	0.903	0.936	0.914	0.814
Q8ND56	Protein LSM14 homolog A OS=Homo sapiens GN=LSM14A PE=1 SV=3	7	50.5	0.891	0.903	0.878	0.916	0.797
Q8ND04-2	Isoform 2 of Protein SMG8 OS=Homo sapiens GN=SMG8	4	113.3	1.031	0.929	0.966	1.045	0.85
Q8NCN5	Pyruvate dehydrogenase phosphatase regulatory subunit, mitochondrial OS=Homo sapiens GN=PDPR PE=1 SV=2	2	99.3	0.87	1.013	0.899	0.989	1.229
Q8NCM8-2	Isoform 2 of Cytoplasmic dynein 2 heavy chain 1 OS=Homo sapiens GN=DYNC2H1	2	493.1	0.913	0.866	0.761	0.869	0.854
Q8NCG7	Sn1-specific diacylglycerol lipase beta OS=Homo sapiens GN=DAGLB PE=1 SV=2	6	73.7	0.868	0.961	0.924	0.828	0.864
Q8NCB2	CaM kinase-like vesicle-associated protein OS=Homo sapiens GN=CAMKV PE=2 SV=2	104	54.3	1.249	1.009	0.659	1.169	0.01
Q8NCA5	Protein FAM98A OS=Homo sapiens GN=FAM98A PE=1 SV=1	8	55.4	0.917	0.961	0.868	0.952	0.906
Q8NC96	Adaptin ear-binding coat-associated protein 1 OS=Homo sapiens GN=NECAP1 PE=1 SV=2	26	29.7	1.035	1	1.011	0.833	0.835
Q8NC67	Neuropilin and tolloid-like protein 2 OS=Homo sapiens GN=NETO2 PE=1 SV=1	3	59.4	0.66	0.868	0.741	0.887	0.793
Q8NC56	LEM domain-containing protein 2 OS=Homo sapiens GN=LEMD2 PE=1 SV=1	8	56.9	0.975	0.968	0.821	0.901	0.791
Q8NC44	Protein FAM134A OS=Homo sapiens GN=FAM134A PE=1 SV=3	6	57.8	0.771	1.075	0.852	0.76	0.827
Q8NC24	RELT-like protein 2 OS=Homo sapiens GN=RELL2 PE=1 SV=1	2	32.4
Q8NBX0	Saccharopine dehydrogenase-like oxidoreductase OS=Homo sapiens GN=SCCPDH PE=1 SV=1	34	47.1	1.147	1.12	1.095	1.129	1.22
Q8NBV4	Inactive phospholipid phosphatase 7 OS=Homo sapiens GN=PLPP7 PE=2 SV=1	4	29.4	1.078	1.014	1.25	1.214	1.281
Q8NBU5	ATPase family AAA domain-containing protein 1 OS=Homo sapiens GN=ATAD1 PE=1 SV=1	28	40.7	0.916	0.968	0.912	0.869	0.854
Q8NBS9	Thioredoxin domain-containing protein 5 OS=Homo sapiens GN=TXNDC5 PE=1 SV=2	22	47.6	0.901	0.898	0.992	0.949	1.083
Q8NBQ5	Estradiol 17-beta-dehydrogenase 11 OS=Homo sapiens GN=HSD17B11 PE=1 SV=3	4	32.9	0.862	0.882	0.854	0.957	0.844
Q8NBN7	Retinol dehydrogenase 13 OS=Homo sapiens GN=RDH13 PE=1 SV=2	22	35.9	0.661	0.991	0.757	0.749	0.66
Q8NBM8	Prenylcysteine oxidase-like OS=Homo sapiens GN=PCYOX1L PE=1 SV=2	4	54.6	0.909	0.996	0.772	0.906	0.865
Q8NBL1	Protein O-glucosyltransferase 1 OS=Homo sapiens GN=POGLUT1 PE=1 SV=1	5	46.2	0.89	0.982	0.882	0.97	0.918
Q8NBJ5	Procollagen galactosyltransferase 1 OS=Homo sapiens GN=COLGALT1 PE=1 SV=1	2	71.6	1.028	0.964	1.11	1.416	1.371
Q8NBJ4	Golgi membrane protein 1 OS=Homo sapiens GN=GOLM1 PE=1 SV=1	13	45.3	0.976	1.085	0.98	0.961	0.927
Q8NBF2	NHL repeat-containing protein 2 OS=Homo sapiens GN=NHLRC2 PE=1 SV=1	2	79.4	1.691	1.639	1.778	2.53	2.25
Q8NB90	Spermatogenesis-associated protein 5 OS=Homo sapiens GN=SPATA5 PE=1 SV=3	8	97.8	1.284	1.515	1.354	1.368	1.082
Q8NB37-2	Isoform 2 of Parkinson disease 7 domain-containing protein 1 OS=Homo sapiens GN=PDDC1	10	26.8	0.88	0.857	0.936	0.816	0.853
Q8NAA5	Leucine-rich repeat-containing protein 75A OS=Homo sapiens GN=LRRC75A PE=2 SV=2	6	37.8	0.908	0.939	0.864	0.833	0.783
Q8N9R8-2	Isoform 2 of Protein SCAI OS=Homo sapiens GN=SCAI	26	72.9	0.749	0.908	0.794	0.733	0.66
Q8N9N8	Probable RNA-binding protein EIF1AD OS=Homo sapiens GN=EIF1AD PE=1 SV=1	2	19	0.924	0.892	0.884	0.861	0.845
Q8N9N7	Leucine-rich repeat-containing protein 57 OS=Homo sapiens GN=LRRC57 PE=1 SV=1	42	26.7	0.988	0.94	0.908	0.976	0.923
Q8N9I9-2	Isoform 2 of Probable E3 ubiquitin-protein ligase DTX3 OS=Homo sapiens GN=DTX3	6	38.1	1.054	0.945	0.953	0.749	0.651
Q8N9F7	Glycerophosphodiester phosphodiesterase domain-containing protein 1 OS=Homo sapiens GN=GDPD1 PE=1 SV=2	26	36.1	0.908	1.069	0.963	1.034	0.979
Q8N9F0	N-acetylaspartate synthetase OS=Homo sapiens GN=NAT8L PE=1 SV=3	4	32.8	0.835	0.909	0.776	0.65	0.637
Q8N987	N-terminal EF-hand calcium-binding protein 1 OS=Homo sapiens GN=NECAB1 PE=1 SV=1	19	40.5	0.901	1.019	1.056	0.997	1.039
Q8N8R5	UPF0565 protein C2orf69 OS=Homo sapiens GN=C2orf69 PE=1 SV=1	4	43.4	0.924	0.97	0.914	0.846	0.799
Q8N8N7	Prostaglandin reductase 2 OS=Homo sapiens GN=PTGR2 PE=1 SV=1	18	38.5	1.026	0.979	0.993	1.131	1.033
Q8N8A2-2	Isoform 2 of Serine/threonine-protein phosphatase 6 regulatory ankyrin repeat subunit B OS=Homo sapiens GN=ANKRD44	4	107.7	0.795	0.86	0.913	1.126	1.119
Q8N806	Putative E3 ubiquitin-protein ligase UBR7 OS=Homo sapiens GN=UBR7 PE=1 SV=2	4	48	1.022	0.756	0.885	0.739	0.602
Q8N7J2	APC membrane recruitment protein 2 OS=Homo sapiens GN=AMER2 PE=1 SV=3	63	69.5	1.192	1.115	1.272	1.181	1.638
Q8N7G1	Purine nucleoside phosphorylase OS=Homo sapiens PE=2 SV=1	11	32.5	1.065	1.138	1.129	1.113	1.114
Q8N766	ER membrane protein complex subunit 1 OS=Homo sapiens GN=EMC1 PE=1 SV=1	16	111.7	0.948	0.996	0.941	0.898	0.881
Q8N6W0	CUGBP Elav-like family member 5 OS=Homo sapiens GN=CELF5 PE=1 SV=1	6	52.3	0.975	0.923	0.88	0.79	0.645
Q8N6T3-2	Isoform 2 of ADP-ribosylation factor GTPase-activating protein 1 OS=Homo sapiens GN=ARFGAP1	43	45.6	0.918	0.887	0.941	0.788	0.71
Q8N6N7	Acyl-CoA-binding domain-containing protein 7 OS=Homo sapiens GN=ACBD7 PE=1 SV=1	12	9.8	0.971	0.831	1.044	0.868	0.738
Q8N6N2	Tetratricopeptide repeat protein 9B OS=Homo sapiens GN=TTC9B PE=2 SV=1	6	25.9	1.206	0.977	0.983	0.902	0.7
Q8N6I9	GNAO1 protein OS=Homo sapiens GN=GNAO1 PE=2 SV=2	406	34.6	0.775	0.852	1.131	1.438	1.242
Q8N6H7	ADP-ribosylation factor GTPase-activating protein 2 OS=Homo sapiens GN=ARFGAP2 PE=1 SV=1	12	56.7	0.985	0.946	0.947	0.859	0.71
Q8N6D5	Ankyrin repeat domain-containing protein 29 OS=Homo sapiens GN=ANKRD29 PE=2 SV=2	12	32.4	0.96	1.067	0.939	1.003	1.033
Q8N6C5-4	Isoform 4 of Immunoglobulin superfamily member 1 OS=Homo sapiens GN=IGSF1	8	149.3	0.915	1.043	0.961	1.028	1.129
Q8N684-3	Isoform 3 of Cleavage and polyadenylation specificity factor subunit 7 OS=Homo sapiens GN=CPSF7	4	56.3	0.61	0.837	0.798	0.76	0.722
Q8N653	Leucine-zipper-like transcriptional regulator 1 OS=Homo sapiens GN=LZTR1 PE=1 SV=2	2	94.7	0.555	0.54	0.546	0.599	0.499
Q8N608-3	Isoform 3 of Inactive dipeptidyl peptidase 10 OS=Homo sapiens GN=DPP10	73	91.1	0.936	0.919	0.853	0.895	0.8
Q8N5Z5	BTB/POZ domain-containing protein KCTD17 OS=Homo sapiens GN=KCTD17 PE=1 SV=3	2	35.6	1.383	1.553	1.37	1.556	1.521
Q8N5V2	Ephexin-1 OS=Homo sapiens GN=NGEF PE=1 SV=2	22	82.4	0.667	0.819	0.678	0.636	0.475
Q8N5S9	Calcium/calmodulin-dependent protein kinase kinase 1 OS=Homo sapiens GN=CAMKK1 PE=1 SV=2	23	55.7	1.135	0.896	0.964	0.958	0.872
Q8N5N7	39S ribosomal protein L50, mitochondrial OS=Homo sapiens GN=MRPL50 PE=1 SV=2	5	18.3	0.901	0.958	0.895	0.825	0.871
Q8N5M4	Tetratricopeptide repeat protein 9C OS=Homo sapiens GN=TTC9C PE=1 SV=1	4	20	1.284	1.237	1.353	1.015	1.22
Q8N5M1	ATP synthase mitochondrial F1 complex assembly factor 2 OS=Homo sapiens GN=ATPAF2 PE=1 SV=1	2	32.8	1.092	0.952	0.95	1.053	0.928
Q8N5K1	CDGSH iron-sulfur domain-containing protein 2 OS=Homo sapiens GN=CISD2 PE=1 SV=1	14	15.3	0.952	1.018	1.09	1.26	1.347
Q8N5J2	Ubiquitin carboxyl-terminal hydrolase MINDY-1 OS=Homo sapiens GN=FAM63A PE=1 SV=2	10	51.7	1.174	1.141	1.116	1.208	1.289
Q8N5G2	Macoilin OS=Homo sapiens GN=TMEM57 PE=1 SV=1	5	76.1	1.129	1.161	1.284	1.077	1.194
Q8N5F7	NF-kappa-B-activating protein OS=Homo sapiens GN=NKAP PE=1 SV=1	2	47.1	0.619	0.849	0.716	0.751	0.71
Q8N5C8	TGF-beta-activated kinase 1 and MAP3K7-binding protein 3 OS=Homo sapiens GN=TAB3 PE=1 SV=2	4	78.6	1.011	0.934	1.116	0.984	0.925
Q8N5B7	Ceramide synthase 5 OS=Homo sapiens GN=CERS5 PE=2 SV=1	2	45.7	0.97	1.411	1.068	1.1	1.224
Q8N573-2	Isoform 2 of Oxidation resistance protein 1 OS=Homo sapiens GN=OXR1	146	93.7	0.935	0.964	0.988	0.891	0.943
Q8N573	Oxidation resistance protein 1 OS=Homo sapiens GN=OXR1 PE=1 SV=2	171	97.9	0.95	1.008	0.983	0.856	0.863
Q8N568-3	Isoform 3 of Serine/threonine-protein kinase DCLK2 OS=Homo sapiens GN=DCLK2	64	85.3	0.83	0.84	0.872	0.851	0.748
Q8N556-2	Isoform 2 of Actin filament-associated protein 1 OS=Homo sapiens GN=AFAP1	2	89.7	0.779	0.951	0.665	0.616	0.525
Q8N4V2	Synaptic vesicle 2-related protein OS=Homo sapiens GN=SVOP PE=2 SV=1	10	60.7	1.085	1.013	0.911	0.892	0.813
Q8N4V1-2	Isoform 2 of Membrane magnesium transporter 1 OS=Homo sapiens GN=MMGT1	2	21.9	0.72	1.078	0.722	0.493	0.671
Q8N4T8	Carbonyl reductase family member 4 OS=Homo sapiens GN=CBR4 PE=1 SV=3	10	25.3	0.838	0.977	0.869	0.961	0.917
Q8N4S1	Proliferation-inducing protein 33 OS=Homo sapiens GN=SPARCL1 PE=2 SV=1	95	75.2	0.973	1.038	1.028	1.002	1.181
Q8N4Q0	Prostaglandin reductase 3 OS=Homo sapiens GN=ZADH2 PE=1 SV=1	4	40.1	0.767	0.887	0.775	0.632	0.559
Q8N4P3	Guanosine-3',5'-bis(diphosphate) 3'-pyrophosphohydrolase MESH1 OS=Homo sapiens GN=HDDC3 PE=1 SV=3	4	20.3	1.193	1.144	1.232	1.194	1.274
Q8N4L3	RBP7 protein (Fragment) OS=Homo sapiens GN=RBP7 PE=2 SV=1	2	25.8	0.92	0.929	0.926	1.219	1.51
Q8N4L2	Type 2 phosphatidylinositol 4,5-bisphosphate 4-phosphatase OS=Homo sapiens GN=TMEM55A PE=1 SV=1	2	28.1
Q8N4L1	Transmembrane protein 151A OS=Homo sapiens GN=TMEM151A PE=2 SV=1	1	51.2	1.161	0.01	0.874	1.018	1.01
Q8N4C8-3	Isoform 2 of Misshapen-like kinase 1 OS=Homo sapiens GN=MINK1	66	146.6	1.11	0.925	0.964	0.766	0.745
Q8N4B5	Proline-rich protein 18 OS=Homo sapiens GN=PRR18 PE=2 SV=2	6	30.9	1.147	0.905	1.599	1.929	2.324
Q8N490-2	Isoform 2 of Probable hydrolase PNKD OS=Homo sapiens GN=PNKD	6	15.4	0.946	1.108	0.987	0.932	0.98
Q8N488	RING1 and YY1-binding protein OS=Homo sapiens GN=RYBP PE=1 SV=2	3	24.8
Q8N474	Secreted frizzled-related protein 1 OS=Homo sapiens GN=SFRP1 PE=1 SV=1	2	35.4	1.041	1.403	1.42	1.609	1.331
Q8N468	Major facilitator superfamily domain-containing protein 4A OS=Homo sapiens GN=MFSD4A PE=2 SV=3	4	56.2	1.009	0.988	0.916	1.039	0.797
Q8N465	D-2-hydroxyglutarate dehydrogenase, mitochondrial OS=Homo sapiens GN=D2HGDH PE=1 SV=3	20	56.4	1.22	1.135	1.077	0.89	0.959
Q8N461	F-box/LRR-repeat protein 16 OS=Homo sapiens GN=FBXL16 PE=2 SV=2	22	51.6	0.846	0.9	0.81	0.785	0.746
Q8N3X1-2	Isoform 2 of Formin-binding protein 4 OS=Homo sapiens GN=FNBP4	2	110.4	1.189	0.84	1.222	0.921	1.097
Q8N3P5	Putative uncharacterized protein DKFZp761K058 OS=Homo sapiens GN=DKFZp761K058 PE=2 SV=2	4	52.2	1.336	0.934	1.36	1.459	1.396
Q8N3J6-3	Isoform 3 of Cell adhesion molecule 2 OS=Homo sapiens GN=CADM2	133	47.5	1.029	1.139	1.002	0.935	0.905
Q8N3J5	Protein phosphatase 1K, mitochondrial OS=Homo sapiens GN=PPM1K PE=1 SV=1	2	41
Q8N3F8	MICAL-like protein 1 OS=Homo sapiens GN=MICALL1 PE=1 SV=2	8	93.4	1.232	1.092	1.086	1.133	1.572
Q8N3F0	Maturin OS=Homo sapiens GN=MTURN PE=2 SV=2	6	14.9	0.68	0.749	0.793	0.847	0.753
Q8N3E9	1-phosphatidylinositol 4,5-bisphosphate phosphodiesterase delta-3 OS=Homo sapiens GN=PLCD3 PE=1 SV=3	24	89.2	0.987	0.979	1.051	1.229	1.137
Q8N398	von Willebrand factor A domain-containing protein 5B2 OS=Homo sapiens GN=VWA5B2 PE=2 SV=2	2	132.7	0.896	1.187	1.123	0.801	0.738
Q8N370-4	Isoform 4 of Large neutral amino acids transporter small subunit 4 OS=Homo sapiens GN=SLC43A2	4	47.9	0.89	0.932	0.941	0.945	0.967
Q8N355	IGL@ protein OS=Homo sapiens GN=IGL@ PE=1 SV=1	58	24.8	1.611	1.129	1.5	1.514	1.919
Q8N353	TMEM106B protein (Fragment) OS=Homo sapiens GN=TMEM106B PE=2 SV=1	18	35.1	0.954	1.01	0.981	0.931	0.949
Q8N336	ELMO domain-containing protein 1 OS=Homo sapiens GN=ELMOD1 PE=2 SV=3	2	39	0.811	0.925	0.837	0.885	0.762
Q8N335	Glycerol-3-phosphate dehydrogenase 1-like protein OS=Homo sapiens GN=GPD1L PE=1 SV=1	48	38.4	1.239	1.09	1.365	1.261	1.269
Q8N302-2	Isoform 2 of Angiogenic factor with G patch and FHA domains 1 OS=Homo sapiens GN=AGGF1	5	12.5	0.67	0.573	0.545	1.269	1.679
Q8N2U9	PQ-loop repeat-containing protein 1 OS=Homo sapiens GN=PQLC1 PE=1 SV=1	2	30.5	0.733	0.89	0.824	0.954	0.898
Q8N2K0-2	Isoform 2 of Monoacylglycerol lipase ABHD12 OS=Homo sapiens GN=ABHD12	30	45.5	1.073	1.218	1.005	0.969	0.965
Q8N2F6	Armadillo repeat-containing protein 10 OS=Homo sapiens GN=ARMC10 PE=1 SV=1	24	37.5	0.866	0.868	0.821	0.744	0.605
Q8N1W1-6	Isoform 6 of Rho guanine nucleotide exchange factor 28 OS=Homo sapiens GN=ARHGEF28	2	194.4	1.068	1.122	1.022	1.074	1
Q8N1K5-4	Isoform 4 of Protein THEMIS OS=Homo sapiens GN=THEMIS	6	77.5	1.525	1.881	1.589	2.321	3.043
Q8N1G4	Leucine-rich repeat-containing protein 47 OS=Homo sapiens GN=LRRC47 PE=1 SV=1	63	63.4	0.837	0.858	0.85	0.778	0.724
Q8N1G0	Zinc finger protein 687 OS=Homo sapiens GN=ZNF687 PE=1 SV=1	3	129.4	1.229	1.441	1.254	1.153	0.947
Q8N1A0	Keratin-like protein KRT222 OS=Homo sapiens GN=KRT222 PE=2 SV=1	2	34.1	0.43	0.931	0.643	0.611	0.721
Q8N183	Mimitin, mitochondrial OS=Homo sapiens GN=NDUFAF2 PE=1 SV=1	20	19.8	1.066	1.169	1.057	0.953	1.104
Q8N145	Leucine-rich repeat LGI family member 3 OS=Homo sapiens GN=LGI3 PE=2 SV=1	36	61.7	1.1	1.332	1.031	1.195	1.453
Q8N142	Adenylosuccinate synthetase isozyme 1 OS=Homo sapiens GN=ADSSL1 PE=1 SV=1	7	50.2	0.981	1.059	1.081	1.186	1.487
Q8N138	ORM1-like protein 3 OS=Homo sapiens GN=ORMDL3 PE=1 SV=1	1	17.5
Q8N135	Leucine-rich repeat LGI family member 4 OS=Homo sapiens GN=LGI4 PE=2 SV=1	4	59.1	1.117	1.229	1.158	1.12	1.197
Q8N129	Protein canopy homolog 4 OS=Homo sapiens GN=CNPY4 PE=2 SV=1	2	28.3
Q8N128-2	Isoform 2 of Protein FAM177A1 OS=Homo sapiens GN=FAM177A1	15	26	1.562	1.37	1.378	1.372	1.947
Q8N126-2	Isoform 2 of Cell adhesion molecule 3 OS=Homo sapiens GN=CADM3	140	47	1.203	1.13	1.065	1.005	0.941
Q8N122	Regulatory-associated protein of mTOR OS=Homo sapiens GN=RPTOR PE=1 SV=1	8	148.9	0.853	0.743	0.807	0.794	0.698
Q8N118	Cytochrome P450 4X1 OS=Homo sapiens GN=CYP4X1 PE=2 SV=1	2	58.8	0.97	1.043	0.908	0.777	0.609
Q8N111	Cell cycle exit and neuronal differentiation protein 1 OS=Homo sapiens GN=CEND1 PE=1 SV=1	130	14.9	0.943	1.175	0.852	0.814	0.814
Q8N0Z6	Tetratricopeptide repeat protein 5 OS=Homo sapiens GN=TTC5 PE=1 SV=2	8	48.9	1.185	1.046	1.194	1.167	1.193
Q8N0W4-2	Isoform 2 of Neuroligin-4, X-linked OS=Homo sapiens GN=NLGN4X	19	94	0.895	0.936	0.875	0.991	0.933
Q8N0W3-2	Isoform 2 of L-fucose kinase OS=Homo sapiens GN=FUK	10	118.3	1.059	0.947	1.059	1.113	1.13
Q8N0V4	Leucine-rich repeat LGI family member 2 OS=Homo sapiens GN=LGI2 PE=2 SV=1	4	62.3	0.87	1.35	1.234	1.475	2.909
Q8IZU2	WD repeat-containing protein 17 OS=Homo sapiens GN=WDR17 PE=2 SV=2	12	147.6	1.079	0.977	1.222	1.051	1.068
Q8IZS8	Voltage-dependent calcium channel subunit alpha-2/delta-3 OS=Homo sapiens GN=CACNA2D3 PE=1 SV=1	14	122.9	0.878	1.076	1.259	1.58	1.327
Q8IZR5-2	Isoform 2 of CKLF-like MARVEL transmembrane domain-containing protein 4 OS=Homo sapiens GN=CMTM4	12	22.8	1.09	1.006	1.101	1.127	1.113
Q8IZQ5	Selenoprotein H OS=Homo sapiens GN=SELH PE=1 SV=2	2	13.4
Q8IZQ1	WD repeat and FYVE domain-containing protein 3 OS=Homo sapiens GN=WDFY3 PE=1 SV=2	9	395	1.004	1.014	0.97	0.957	0.971
Q8IZP7	Heparan-sulfate 6-O-sulfotransferase 3 OS=Homo sapiens GN=HS6ST3 PE=2 SV=3	2	54.8	0.431	0.808	0.563	0.783	0.604
Q8IZP0	Abl interactor 1 OS=Homo sapiens GN=ABI1 PE=1 SV=4	34	55	0.99	0.917	0.962	0.906	0.909
Q8IZJ1	Netrin receptor UNC5B OS=Homo sapiens GN=UNC5B PE=1 SV=2	2	103.6	0.966	1.097	1.094	1.113	1.171
Q8IZD9	Dedicator of cytokinesis protein 3 OS=Homo sapiens GN=DOCK3 PE=1 SV=1	14	233	0.79	0.899	0.831	0.777	0.682
Q8IZD0-2	Isoform 2 of Sterile alpha motif domain-containing protein 14 OS=Homo sapiens GN=SAMD14	4	48	1.012	1.122	1.044	1.066	0.936
Q8IZ83	Aldehyde dehydrogenase family 16 member A1 OS=Homo sapiens GN=ALDH16A1 PE=1 SV=2	10	85.1	1.177	1.076	1.131	1.143	1.282
Q8IZ81	ELMO domain-containing protein 2 OS=Homo sapiens GN=ELMOD2 PE=1 SV=1	2	34.9	0.837	0.849	0.878	0.712	0.71
Q8IZ73	RNA pseudouridylate synthase domain-containing protein 2 OS=Homo sapiens GN=RPUSD2 PE=1 SV=2	2	61.3	2.663	2.044	1.969	0.886	0.965
Q8IZ57	Neurensin-1 OS=Homo sapiens GN=NRSN1 PE=1 SV=1	2	21.5
Q8IZ21-2	Isoform 2 of Phosphatase and actin regulator 4 OS=Homo sapiens GN=PHACTR4	1	79.1	1.247	1.129	1.279	1.242	1.408
Q8IZ03	Interferon-induced protein with tetratricopeptide repeats 2 OS=Homo sapiens GN=IFIT2 PE=2 SV=2	4	56.2	0.925	0.923	0.871	1.032	0.846
Q8IYV2	DEAD (Asp-Glu-Ala-Asp) box polypeptide 20 OS=Homo sapiens GN=DDX20 PE=2 SV=1	2	92.1	1.065	1.039	0.943	1.024	0.797
Q8IYU2	E3 ubiquitin-protein ligase HACE1 OS=Homo sapiens GN=HACE1 PE=1 SV=2	6	102.3	0.84	0.803	0.922	0.761	0.634
Q8IYR6	Tomoregulin-1 OS=Homo sapiens GN=TMEFF1 PE=1 SV=1	4	40.9	1.03	0.959	1.292	1.475	1.306
Q8IYQ7	Threonine synthase-like 1 OS=Homo sapiens GN=THNSL1 PE=1 SV=2	18	83	0.762	0.871	0.802	0.698	0.663
Q8IYJ1	Copine-9 OS=Homo sapiens GN=CPNE9 PE=1 SV=3	26	61.8	1.29	2.072	1.379	1.192	1.037
Q8IYI6	Exocyst complex component 8 OS=Homo sapiens GN=EXOC8 PE=1 SV=2	23	81.7	0.881	0.819	0.816	0.694	0.653
Q8IYB8	ATP-dependent RNA helicase SUPV3L1, mitochondrial OS=Homo sapiens GN=SUPV3L1 PE=1 SV=1	10	87.9	0.846	0.874	0.843	0.78	0.735
Q8IYB7	DIS3-like exonuclease 2 OS=Homo sapiens GN=DIS3L2 PE=1 SV=4	14	99.2	0.899	0.839	0.935	0.936	0.9
Q8IY95	Transmembrane protein 192 OS=Homo sapiens GN=TMEM192 PE=1 SV=1	4	30.9	0.883	0.976	0.974	0.834	0.844
Q8IY45	Protein AMN1 homolog OS=Homo sapiens GN=AMN1 PE=2 SV=4	2	28.4	0.734	0.793	0.872	0.734	0.813
Q8IY33	MICAL-like protein 2 OS=Homo sapiens GN=MICALL2 PE=1 SV=1	6	97.4	0.892	0.933	1.084	1.08	0.98
Q8IY31-2	Isoform 2 of Intraflagellar transport protein 20 homolog OS=Homo sapiens GN=IFT20	2	18.1
Q8IY26	Phospholipid phosphatase 6 OS=Homo sapiens GN=PLPP6 PE=1 SV=3	2	32.2
Q8IY17-4	Isoform 4 of Neuropathy target esterase OS=Homo sapiens GN=PNPLA6	15	150.9	0.828	0.959	0.875	0.848	0.742
Q8IXT5	RNA-binding protein 12B OS=Homo sapiens GN=RBM12B PE=1 SV=2	4	118	0.762	0.887	0.564	1.015	0.837
Q8IXS8	Protein FAM126B OS=Homo sapiens GN=FAM126B PE=1 SV=1	18	58.6	0.955	0.995	1.21	0.866	0.864
Q8IXS6	Paralemmin-2 OS=Homo sapiens GN=PALM2 PE=1 SV=3	29	42.2	0.803	1.001	0.889	0.906	1.029
Q8IXM3	39S ribosomal protein L41, mitochondrial OS=Homo sapiens GN=MRPL41 PE=1 SV=1	2	15.4	1.073	1.053	1.201	0.866	0.941
Q8IXJ6	NAD-dependent protein deacetylase sirtuin-2 OS=Homo sapiens GN=SIRT2 PE=1 SV=2	180	43.2	1.334	1.281	1.145	1.35	1.786
Q8IXI2-3	Isoform 3 of Mitochondrial Rho GTPase 1 OS=Homo sapiens GN=RHOT1	28	79.5	0.806	0.929	0.922	1.003	0.914
Q8IXB1	DnaJ homolog subfamily C member 10 OS=Homo sapiens GN=DNAJC10 PE=1 SV=2	4	91	0.922	0.969	1.056	0.982	0.809
Q8IX12	Cell division cycle and apoptosis regulator protein 1 OS=Homo sapiens GN=CCAR1 PE=1 SV=2	16	132.7	1.086	1.087	1.024	1.076	1.056
Q8IX04	Ubiquitin-conjugating enzyme E2 variant 3 OS=Homo sapiens GN=UEVLD PE=1 SV=2	2	52.2
Q8IWZ6	Bardet-Biedl syndrome 7 protein OS=Homo sapiens GN=BBS7 PE=1 SV=2	2	80.3	0.85	0.875	0.889	0.932	0.987
Q8IWW8	Hydroxyacid-oxoacid transhydrogenase, mitochondrial OS=Homo sapiens GN=ADHFE1 PE=1 SV=1	4	50.3	1.109	0.982	1.119	1.022	0.89
Q8IWW6	Rho GTPase-activating protein 12 OS=Homo sapiens GN=ARHGAP12 PE=1 SV=1	11	96.2	0.95	0.934	0.944	0.912	1
Q8IWV8	E3 ubiquitin-protein ligase UBR2 OS=Homo sapiens GN=UBR2 PE=1 SV=1	2	200.4
Q8IWV7	E3 ubiquitin-protein ligase UBR1 OS=Homo sapiens GN=UBR1 PE=1 SV=1	8	200.1	1.156	1.011	1.198	1.134	1.074
Q8IWU2	Serine/threonine-protein kinase LMTK2 OS=Homo sapiens GN=LMTK2 PE=1 SV=2	4	164.8	0.89	0.969	0.988	1.055	0.901
Q8IWT1	Sodium channel subunit beta-4 OS=Homo sapiens GN=SCN4B PE=1 SV=1	4	25	1.298	1.901	1.385	1.674	2.233
Q8IWR0	Zinc finger CCCH domain-containing protein 7A OS=Homo sapiens GN=ZC3H7A PE=1 SV=1	6	110.5	0.859	0.871	0.882	0.916	0.817
Q8IWQ3-4	Isoform 4 of Serine/threonine-protein kinase BRSK2 OS=Homo sapiens GN=BRSK2	38	77.5	0.737	0.831	0.762	0.737	0.674
Q8IWP9	Coiled-coil domain-containing protein 28A OS=Homo sapiens GN=CCDC28A PE=1 SV=1	6	30.3	0.994	0.994	0.92	0.83	0.824
Q8IWJ2	GRIP and coiled-coil domain-containing protein 2 OS=Homo sapiens GN=GCC2 PE=1 SV=4	2	195.8	0.758	0.631	0.709	0.668	0.649
Q8IWE5	Pleckstrin homology domain-containing family M member 2 OS=Homo sapiens GN=PLEKHM2 PE=1 SV=2	1	112.7
Q8IWE4	DCN1-like protein 3 OS=Homo sapiens GN=DCUN1D3 PE=1 SV=1	6	34.3	1.083	1.162	1.181	0.944	0.892
Q8IWB9-2	Isoform 2 of Testis-expressed sequence 2 protein OS=Homo sapiens GN=TEX2	19	125.9	0.959	0.984	0.949	1.005	1.031
Q8IWB7	WD repeat and FYVE domain-containing protein 1 OS=Homo sapiens GN=WDFY1 PE=1 SV=1	10	46.3	0.949	0.857	0.976	0.912	0.874
Q8IWA5-2	Isoform 2 of Choline transporter-like protein 2 OS=Homo sapiens GN=SLC44A2	42	80.7	1.522	1.395	1.249	1.61	1.465
Q8IW50	Protein FAM219A OS=Homo sapiens GN=FAM219A PE=1 SV=3	4	20.4	1.234	1.228	1.255	0.944	1.212
Q8IW45	ATP-dependent (S)-NAD(P)H-hydrate dehydratase OS=Homo sapiens GN=NAXD PE=1 SV=1	45	36.6	1.018	1.029	0.988	1.111	0.989
Q8IW35-2	Isoform 2 of Centrosomal protein of 97 kDa OS=Homo sapiens GN=CEP97	4	99.8	1.308	1.23	1.087	1.055	1.199
Q8IVT5	Kinase suppressor of Ras 1 OS=Homo sapiens GN=KSR1 PE=1 SV=3	8	102.1	1.095	1.034	1.102	0.901	0.891
Q8IVS2	Malonyl-CoA-acyl carrier protein transacylase, mitochondrial OS=Homo sapiens GN=MCAT PE=1 SV=2	8	42.9	1.018	1.086	0.871	0.791	0.888
Q8IVP5	FUN14 domain-containing protein 1 OS=Homo sapiens GN=FUNDC1 PE=1 SV=1	2	17.2	1.237	1.041	0.988	0.01	0.01
Q8IVM0-2	Isoform 2 of Coiled-coil domain-containing protein 50 OS=Homo sapiens GN=CCDC50	2	56.3	1.388	1.183	1.211	1.229	1.369
Q8IVL0	Neuron navigator 3 OS=Homo sapiens GN=NAV3 PE=1 SV=3	2	255.5	0.64	0.718	0.673	0.68	0.339
Q8IVF2	Protein AHNAK2 OS=Homo sapiens GN=AHNAK2 PE=1 SV=2	65	616.2	1.084	1.081	1.046	0.971	1.303
Q8IV50	LysM and putative peptidoglycan-binding domain-containing protein 2 OS=Homo sapiens GN=LYSMD2 PE=1 SV=1	10	23.4	0.918	0.864	0.912	0.828	0.733
Q8IV36	Protein HID1 OS=Homo sapiens GN=HID1 PE=1 SV=1	8	88.7	0.858	0.874	0.861	0.831	0.732
Q8IV03	Leucine rich adaptor protein 1-like OS=Homo sapiens GN=LURAP1L PE=1 SV=2	2	24.6	0.933	0.904	1.055	0.701	0.76
Q8IUZ5	5-phosphohydroxy-L-lysine phospho-lyase OS=Homo sapiens GN=PHYKPL PE=1 SV=1	4	49.7	0.915	0.92	1.076	1.229	1.012
Q8IUY4	C22orf9 protein (Fragment) OS=Homo sapiens GN=C22orf9 PE=2 SV=1	6	52.9	1.129	0.861	1.043	1.054	1.525
Q8IUW5	RELT-like protein 1 OS=Homo sapiens GN=RELL1 PE=1 SV=1	2	29.3	1.07	0.958	1.041	1.338	1.421
Q8IUR7	Armadillo repeat-containing protein 8 OS=Homo sapiens GN=ARMC8 PE=1 SV=2	12	75.5	0.839	0.867	0.875	0.782	0.655
Q8IUR0	Trafficking protein particle complex subunit 5 OS=Homo sapiens GN=TRAPPC5 PE=1 SV=1	4	20.8	0.868	0.942	0.83	0.854	0.824
Q8IUQ0	Clavesin-1 OS=Homo sapiens GN=CLVS1 PE=1 SV=1	8	40.8	1.05	1.114	0.965	0.942	0.857
Q8IUL9	Hemoglobin beta chain variant Hb.Sinai-Bel Air (Fragment) OS=Homo sapiens GN=HBB PE=3 SV=1	354	11.5
Q8IUK5	Plexin domain-containing protein 1 OS=Homo sapiens GN=PLXDC1 PE=1 SV=2	2	55.7
Q8IUI8	Cytokine receptor-like factor 3 OS=Homo sapiens GN=CRLF3 PE=1 SV=2	4	49.7	0.904	0.996	0.999	0.969	0.899
Q8IU85	Calcium/calmodulin-dependent protein kinase type 1D OS=Homo sapiens GN=CAMK1D PE=1 SV=1	26	42.9	0.989	0.989	0.995	0.867	0.818
Q86YZ3	Hornerin OS=Homo sapiens GN=HRNR PE=1 SV=2	2	282.2	1.18	2.32	0.941	0.787	0.893
Q86YV0	RAS protein activator like-3 OS=Homo sapiens GN=RASAL3 PE=1 SV=2	4	111.8	1.418	1.168	0.89	0.836	0.887
Q86YT5	Solute carrier family 13 member 5 OS=Homo sapiens GN=SLC13A5 PE=1 SV=1	4	63	0.675	1.049	0.721	0.761	0.756
Q86YQ8	Copine-8 OS=Homo sapiens GN=CPNE8 PE=1 SV=2	41	63.1	1.023	1.021	1.005	0.879	0.875
Q86YQ4	Alpha-1 globin (Fragment) OS=Homo sapiens GN=HBA1 PE=3 SV=1	17	9.5	0.946	0.838	1.013	1.058	1.305
Q86YQ0	HZGJ OS=Homo sapiens GN=HZGJ PE=2 SV=1	26	84.7	0.979	0.92	1.024	1.551	1.155
Q86YM7	Homer protein homolog 1 OS=Homo sapiens GN=HOMER1 PE=1 SV=2	42	40.3	0.68	0.764	0.765	0.63	0.491
Q86Y82	Syntaxin-12 OS=Homo sapiens GN=STX12 PE=1 SV=1	36	31.6	1.097	1.07	1.077	0.934	0.968
Q86Y79	Probable peptidyl-tRNA hydrolase OS=Homo sapiens GN=PTRH1 PE=1 SV=1	2	22.9	0.726	0.85	0.819	0.853	0.738
Q86Y39	NADH dehydrogenase [ubiquinone] 1 alpha subcomplex subunit 11 OS=Homo sapiens GN=NDUFA11 PE=1 SV=3	19	14.8	0.916	1.287	0.987	0.94	1.041
Q86Y01	E3 ubiquitin-protein ligase DTX1 OS=Homo sapiens GN=DTX1 PE=1 SV=1	2	67.3
Q86XR7-2	Isoform 2 of TIR domain-containing adapter molecule 2 OS=Homo sapiens GN=TICAM2	5	46.1	1.085	1.161	1.113	1.537	1.48
Q86XP1	Diacylglycerol kinase eta OS=Homo sapiens GN=DGKH PE=1 SV=1	2	134.8	0.917	0.991	0.815	0.838	0.849
Q86XL3	Ankyrin repeat and LEM domain-containing protein 2 OS=Homo sapiens GN=ANKLE2 PE=1 SV=4	6	104.1	0.873	0.854	0.774	0.774	0.793
Q86XE3	Calcium uptake protein 3, mitochondrial OS=Homo sapiens GN=MICU3 PE=2 SV=1	6	60.7	0.905	1.19	0.933	0.824	0.815
Q86XE0	Sorting nexin-32 OS=Homo sapiens GN=SNX32 PE=1 SV=1	9	46.4	0.456	0.666	0.582	0.725	0.392
Q86XD5-3	Isoform 3 of Protein FAM131B OS=Homo sapiens GN=FAM131B	24	38.7	0.971	1	0.983	0.821	0.811
Q86X76	Nitrilase homolog 1 OS=Homo sapiens GN=NIT1 PE=1 SV=2	10	35.9	0.921	0.914	0.894	0.957	0.903
Q86X55	Histone-arginine methyltransferase CARM1 OS=Homo sapiens GN=CARM1 PE=1 SV=3	5	65.8	1.087	0.887	0.896	0.922	0.919
Q86X10	Ral GTPase-activating protein subunit beta OS=Homo sapiens GN=RALGAPB PE=1 SV=1	6	166.7	0.821	0.836	0.789	0.664	0.499
Q86WV7	CCDC43 protein OS=Homo sapiens GN=CCDC43 PE=1 SV=1	8	25.5	1.004	0.929	0.988	0.907	0.943
Q86WV6	Stimulator of interferon genes protein OS=Homo sapiens GN=TMEM173 PE=1 SV=1	2	42.2	0.893	0.949	0.913	0.751	0.822
Q86WU2	Probable D-lactate dehydrogenase, mitochondrial OS=Homo sapiens GN=LDHD PE=1 SV=1	6	54.8	1.117	0.908	1.021	0.885	0.844
Q86WK6	Amphoterin-induced protein 1 OS=Homo sapiens GN=AMIGO1 PE=1 SV=1	6	55.2	0.721	0.856	0.759	0.608	0.618
Q86WG5	Myotubularin-related protein 13 OS=Homo sapiens GN=SBF2 PE=1 SV=1	10	208.3	0.722	0.861	0.787	0.993	0.895
Q86WC4	Osteopetrosis-associated transmembrane protein 1 OS=Homo sapiens GN=OSTM1 PE=1 SV=1	4	37.2	0.948	0.976	0.947	0.811	0.886
Q86WA6	Valacyclovir hydrolase OS=Homo sapiens GN=BPHL PE=1 SV=1	17	32.5	0.961	0.874	1.083	0.879	0.706
Q86W47	Calcium-activated potassium channel subunit beta-4 OS=Homo sapiens GN=KCNMB4 PE=1 SV=2	2	23.9	1.03	1.094	0.92	0.809	0.636
Q86W19	Protease serine 1 (Fragment) OS=Homo sapiens GN=PRSS1 PE=4 SV=1	5	9.2	1.015	0.941	0.909	0.901	0.877
Q86VS8	Protein Hook homolog 3 OS=Homo sapiens GN=HOOK3 PE=1 SV=2	26	83.1	0.948	0.927	0.921	0.785	0.777
Q86VR2	Protein FAM134C OS=Homo sapiens GN=FAM134C PE=1 SV=1	6	51.4	1.085	1.079	0.883	0.815	0.951
Q86VQ1	Glucocorticoid-induced transcript 1 protein OS=Homo sapiens GN=GLCCI1 PE=1 SV=1	2	58	0.627	0.75	0.724	0.848	0.921
Q86VP3-3	Isoform 3 of Phosphofurin acidic cluster sorting protein 2 OS=Homo sapiens GN=PACS2	10	97.4	1.03	1.029	0.976	0.995	1.041
Q86VN1	Vacuolar protein-sorting-associated protein 36 OS=Homo sapiens GN=VPS36 PE=1 SV=1	8	43.8	1.11	1.249	1.105	0.96	0.919
Q86V59	PNMA-like protein 1 OS=Homo sapiens GN=PNMAL1 PE=1 SV=2	2	48.1
Q86V37	TAOK2 protein (Fragment) OS=Homo sapiens GN=TAOK2 PE=2 SV=1	9	158.9	0.799	0.802	0.737	0.735	0.665
Q86UY8	5'-nucleotidase domain-containing protein 3 OS=Homo sapiens GN=NT5DC3 PE=1 SV=1	20	63.4	1.127	1.017	0.954	0.859	0.729
Q86UX7	Fermitin family homolog 3 OS=Homo sapiens GN=FERMT3 PE=1 SV=1	4	75.9	0.946	0.99	0.97	1.388	1.201
Q86UX6	Serine/threonine-protein kinase 32C OS=Homo sapiens GN=STK32C PE=1 SV=1	16	55	0.932	0.91	0.895	0.877	0.747
Q86UW8	Hyaluronan and proteoglycan link protein 4 OS=Homo sapiens GN=HAPLN4 PE=2 SV=1	24	42.8	0.895	1.236	1.045	0.993	1.18
Q86UV5-8	Isoform 8 of Ubiquitin carboxyl-terminal hydrolase 48 OS=Homo sapiens GN=USP48	2	120.4	0.866	0.883	0.949	0.754	0.648
Q86UT6	NLR family member X1 OS=Homo sapiens GN=NLRX1 PE=1 SV=1	6	107.5	1.126	1.179	1.07	0.987	0.952
Q86US8	Telomerase-binding protein EST1A OS=Homo sapiens GN=SMG6 PE=1 SV=2	4	160.4	1.15	1.071	1.118	1.048	1.002
Q86UR5	Regulating synaptic membrane exocytosis protein 1 OS=Homo sapiens GN=RIMS1 PE=1 SV=1	48	189	1.211	1.059	1.101	0.942	0.914
Q86UP2	Kinectin OS=Homo sapiens GN=KTN1 PE=1 SV=1	172	156.2	1.152	1.057	1.145	1.129	1.221
Q86UL8	Membrane-associated guanylate kinase, WW and PDZ domain-containing protein 2 OS=Homo sapiens GN=MAGI2 PE=1 SV=3	31	158.7	0.973	0.902	0.905	0.837	0.88
Q86UK7	Zinc finger protein 598 OS=Homo sapiens GN=ZNF598 PE=1 SV=1	3	98.6	1.516	1.217	1.33	1.114	1.177
Q86UE6	Leucine-rich repeat transmembrane neuronal protein 1 OS=Homo sapiens GN=LRRTM1 PE=2 SV=2	2	58.6	0.792	0.854	0.876	0.832	0.755
Q86UE4	Protein LYRIC OS=Homo sapiens GN=MTDH PE=1 SV=2	65	63.8	0.83	0.99	0.813	0.843	0.875
Q86UA3	Chromosome 12 open reading frame 10 OS=Homo sapiens GN=C12orf10 PE=1 SV=1	6	42.5	1.031	0.98	1.02	1.031	0.955
Q86U90	YrdC domain-containing protein, mitochondrial OS=Homo sapiens GN=YRDC PE=1 SV=1	1	29.3
Q86U75	Dihydropyrimidinase-like 2 OS=Homo sapiens PE=2 SV=1	599	67	1.101	0.946	1.008	1.055	1.157
Q86U28	Iron-sulfur cluster assembly 2 homolog, mitochondrial OS=Homo sapiens GN=ISCA2 PE=1 SV=2	6	16.5	0.928	0.912	0.987	0.826	0.798
Q86TX8	Full-length cDNA clone CS0DC015YK16 of Neuroblastoma of Homo sapiens (human) (Fragment) OS=Homo sapiens PE=2 SV=1	6	49.1	0.902	1.021	0.902	0.805	1.059
Q86TW2	Uncharacterized aarF domain-containing protein kinase 1 OS=Homo sapiens GN=ADCK1 PE=2 SV=2	4	60.5	0.954	0.964	0.908	0.737	0.879
Q86TV6-2	Isoform 2 of Tetratricopeptide repeat protein 7B OS=Homo sapiens GN=TTC7B	32	96	0.821	0.879	0.848	0.811	0.69
Q86TP1	Protein prune homolog OS=Homo sapiens GN=PRUNE PE=1 SV=2	8	50.2	0.856	0.823	0.853	0.906	0.778
Q86TM6	E3 ubiquitin-protein ligase synoviolin OS=Homo sapiens GN=SYVN1 PE=1 SV=2	4	67.6	0.798	1.04	0.989	1.183	1.104
Q86TL6	PTPN5 protein (Fragment) OS=Homo sapiens GN=PTPN5 PE=2 SV=1	10	66.7	0.814	1.053	0.847	0.792	0.788
Q86TI2-2	Isoform 2 of Dipeptidyl peptidase 9 OS=Homo sapiens GN=DPP9	8	101.6	0.979	0.988	1.022	0.95	1.099
Q86TI0	TBC1 domain family member 1 OS=Homo sapiens GN=TBC1D1 PE=1 SV=2	5	133	1.43	1.462	1.383	1.549	0.86
Q86T13	C-type lectin domain family 14 member A OS=Homo sapiens GN=CLEC14A PE=1 SV=1	2	51.6	0.792	0.95	0.805	0.921	0.899
Q86SZ2	Trafficking protein particle complex subunit 6B OS=Homo sapiens GN=TRAPPC6B PE=1 SV=1	8	18	0.741	0.942	0.855	0.882	0.927
Q86SX6	Glutaredoxin-related protein 5, mitochondrial OS=Homo sapiens GN=GLRX5 PE=1 SV=2	12	16.6	0.733	0.795	0.849	0.7	0.662
Q86SQ6-1	Isoform 1 of Adhesion G protein-coupled receptor A1 OS=Homo sapiens GN=ADGRA1	2	137.1	0.852	1.042	0.927	0.532	0.673
Q86SK9	Stearoyl-CoA desaturase 5 OS=Homo sapiens GN=SCD5 PE=1 SV=2	6	37.6	0.811	0.908	0.863	0.844	0.8
Q86SE5-3	Isoform 3 of RNA-binding Raly-like protein OS=Homo sapiens GN=RALYL	4	33.9	0.728	0.736	0.647	0.435	0.319
Q7Z7M0	Multiple epidermal growth factor-like domains protein 8 OS=Homo sapiens GN=MEGF8 PE=1 SV=2	20	302.9	1.206	1.095	1.228	1.329	1.337
Q7Z7K6	Centromere protein V OS=Homo sapiens GN=CENPV PE=1 SV=1	4	29.9	1.081	1.011	0.972	1.001	0.862
Q7Z7J7	Lipoma HMGIC fusion partner-like 4 protein OS=Homo sapiens GN=LHFPL4 PE=2 SV=1	2	27	1.239	1.079	1.077	0.942	1.005
Q7Z7H5	Transmembrane emp24 domain-containing protein 4 OS=Homo sapiens GN=TMED4 PE=1 SV=1	10	25.9	1.434	1.453	1.232	1.172	1.284
Q7Z7E8	Ubiquitin-conjugating enzyme E2 Q1 OS=Homo sapiens GN=UBE2Q1 PE=1 SV=1	4	46.1	0.944	0.967	0.942	1.005	0.887
Q7Z7A4	PX domain-containing protein kinase-like protein OS=Homo sapiens GN=PXK PE=1 SV=1	6	64.9	1.159	1.08	1.008	0.96	1.082
Q7Z783	SPRY2 protein OS=Homo sapiens PE=1 SV=1	2	39.1	1.206	1.511	1.396	1.453	1.475
Q7Z739	YTH domain-containing family protein 3 OS=Homo sapiens GN=YTHDF3 PE=1 SV=1	9	63.8	1.003	1.007	0.931	0.846	0.838
Q7Z6M4	Transcription termination factor 4, mitochondrial OS=Homo sapiens GN=MTERF4 PE=1 SV=3	2	43.9	0.485	0.945	0.764	0.679	0.749
Q7Z6L1-4	Isoform 4 of Tectonin beta-propeller repeat-containing protein 1 OS=Homo sapiens GN=TECPR1	12	129.8	1.034	1.001	1.023	0.949	0.837
Q7Z6L0-2	Isoform 2 of Proline-rich transmembrane protein 2 OS=Homo sapiens GN=PRRT2	54	40.2	0.969	0.944	0.878	0.845	0.697
Q7Z6K5-2	Isoform C15orf38-AP3S2 of Arpin OS=Homo sapiens GN=ARPIN	10	43.9	1.029	0.979	1.007	0.846	0.889
Q7Z6J2	General receptor for phosphoinositides 1-associated scaffold protein OS=Homo sapiens GN=GRASP PE=1 SV=1	2	42.6	1.019	0.936	0.957	0.845	0.765
Q7Z6I6	Rho GTPase-activating protein 30 OS=Homo sapiens GN=ARHGAP30 PE=1 SV=3	2	118.5	1.534	1.123	1.506	1.269	1.226
Q7Z6G8	Ankyrin repeat and sterile alpha motif domain-containing protein 1B OS=Homo sapiens GN=ANKS1B PE=1 SV=2	18	138	0.887	0.92	0.868	0.71	0.666
Q7Z6G4	HBA2 (Fragment) OS=Homo sapiens GN=HBA2 PE=3 SV=1	31	3.2	0.58	0.726	0.608	0.717	0.858
Q7Z6G3	N-terminal EF-hand calcium-binding protein 2 OS=Homo sapiens GN=NECAB2 PE=1 SV=1	29	43.2	0.811	0.732	0.803	0.743	0.54
Q7Z699	Sprouty-related, EVH1 domain-containing protein 1 OS=Homo sapiens GN=SPRED1 PE=1 SV=2	6	50.4	0.975	0.811	0.862	0.399	0.371
Q7Z5R6	Amyloid beta A4 precursor protein-binding family B member 1-interacting protein OS=Homo sapiens GN=APBB1IP PE=1 SV=1	2	73.1	0.781	0.915	0.877	0.84	0.869
Q7Z5L9	Interferon regulatory factor 2-binding protein 2 OS=Homo sapiens GN=IRF2BP2 PE=1 SV=2	4	61	0.341	0.957	0.486	0.386	0.409
Q7Z5J4	Retinoic acid-induced protein 1 OS=Homo sapiens GN=RAI1 PE=1 SV=2	1	203.2
Q7Z5G4	Golgin subfamily A member 7 OS=Homo sapiens GN=GOLGA7 PE=1 SV=2	14	15.8	1.013	1.027	0.907	1.14	1.195
Q7Z5B4	Protein RIC-3 OS=Homo sapiens GN=RIC3 PE=1 SV=1	4	41.1	1.061	1.152	0.959	1.061	0.953
Q7Z553-3	Isoform 3 of MAM domain-containing glycosylphosphatidylinositol anchor protein 2 OS=Homo sapiens GN=MDGA2	10	115.2	0.842	0.999	0.903	0.883	0.791
Q7Z528	E3-16 OS=Homo sapiens PE=2 SV=1	2	30.4	0.798	0.837	0.985	0.904	0.946
Q7Z4Y4	GTP:AMP phosphotransferase AK3, mitochondrial OS=Homo sapiens GN=AK3 PE=2 SV=1	44	25.6	0.808	0.859	0.872	1.016	0.798
Q7Z4W1	L-xylulose reductase OS=Homo sapiens GN=DCXR PE=1 SV=2	23	25.9	1.088	1.108	1.117	1.307	1.42
Q7Z4V5	Hepatoma-derived growth factor-related protein 2 OS=Homo sapiens GN=HDGFRP2 PE=1 SV=1	22	74.3	0.94	1.009	1.03	0.918	1.008
Q7Z4S6-4	Isoform 4 of Kinesin-like protein KIF21A OS=Homo sapiens GN=KIF21A	138	187.2	0.889	0.972	0.895	0.854	0.75
Q7Z4K8	Tripartite motif-containing protein 46 OS=Homo sapiens GN=TRIM46 PE=2 SV=2	6	83.4	1.08	1.107	1.006	1.103	0.76
Q7Z4H8	KDEL motif-containing protein 2 OS=Homo sapiens GN=KDELC2 PE=1 SV=2	2	58.5	0.941	0.953	0.898	0.921	0.868
Q7Z4H3	HD domain-containing protein 2 OS=Homo sapiens GN=HDDC2 PE=1 SV=1	8	23.4	0.914	0.95	0.974	1.02	1.119
Q7Z4G1-2	Isoform 2 of COMM domain-containing protein 6 OS=Homo sapiens GN=COMMD6	4	10.9	0.962	0.959	0.904	0.85	0.885
Q7Z460	CLIP-associating protein 1 OS=Homo sapiens GN=CLASP1 PE=1 SV=1	67	169.3	0.897	0.916	0.913	0.784	0.771
Q7Z434	Mitochondrial antiviral-signaling protein OS=Homo sapiens GN=MAVS PE=1 SV=2	6	56.5	1.173	0.99	1.109	1.114	1.185
Q7Z407	CUB and sushi domain-containing protein 3 OS=Homo sapiens GN=CSMD3 PE=2 SV=3	2	405.7	0.848	1.019	1.177	0.905	0.807
Q7Z406-2	Isoform 2 of Myosin-14 OS=Homo sapiens GN=MYH14	136	231.9	1.024	1.05	0.989	0.975	1.019
Q7Z3U7	Protein MON2 homolog OS=Homo sapiens GN=MON2 PE=1 SV=3	10	190.2	0.844	0.819	0.829	0.914	0.904
Q7Z3K4	Putative uncharacterized protein DKFZp686K0193 (Fragment) OS=Homo sapiens GN=DKFZp686K0193 PE=2 SV=1	18	175.2	0.605	0.7	0.742	0.765	0.626
Q7Z3K3	Pogo transposable element with ZNF domain OS=Homo sapiens GN=POGZ PE=1 SV=2	2	155.2	1.814	1.081	1.053	1.046	1.128
Q7Z3B1	Neuronal growth regulator 1 OS=Homo sapiens GN=NEGR1 PE=1 SV=3	130	38.7	1.095	1.097	1.175	1.041	0.993
Q7Z2Z4	Putative uncharacterized protein DKFZp686I14200 (Fragment) OS=Homo sapiens GN=DKFZp686I14200 PE=2 SV=1	4	40.7	0.592	0.753	0.637	1.492	1.214
Q7Z2Z2	Elongation factor-like GTPase 1 OS=Homo sapiens GN=EFL1 PE=1 SV=2	3	125.4
Q7Z2W9	39S ribosomal protein L21, mitochondrial OS=Homo sapiens GN=MRPL21 PE=1 SV=2	2	22.8
Q7Z2K8	G protein-regulated inducer of neurite outgrowth 1 OS=Homo sapiens GN=GPRIN1 PE=1 SV=2	100	102.3	1.033	0.923	0.97	0.853	0.787
Q7Z2K6	Endoplasmic reticulum metallopeptidase 1 OS=Homo sapiens GN=ERMP1 PE=1 SV=2	16	100.2	1.105	1.214	1.136	1.337	1.378
Q7Z2D5	Phospholipid phosphatase-related protein type 4 OS=Homo sapiens GN=PLPPR4 PE=1 SV=1	8	82.9	0.934	0.79	0.811	0.683	0.68
Q7RU04	Aminopeptidase B OS=Homo sapiens GN=RNPEP PE=4 SV=1	18	73.5	0.841	0.868	0.932	1.03	0.86
Q7RTP6	[F-actin]-methionine sulfoxide oxidase MICAL3 OS=Homo sapiens GN=MICAL3 PE=1 SV=2	48	224.2	0.931	0.93	0.913	0.825	0.753
Q7LG56-6	Isoform 6 of Ribonucleoside-diphosphate reductase subunit M2 B OS=Homo sapiens GN=RRM2B	6	48.8	0.856	0.909	0.919	0.943	1.06
Q7LDG7-2	Isoform 2 of RAS guanyl-releasing protein 2 OS=Homo sapiens GN=RASGRP2	2	75.5
Q7LDD5	Calcium/calmodulin-dependent protein kinase (CaM kinase) II alpha, isoform CRA_a OS=Homo sapiens GN=CAMK2A PE=2 SV=1	172	54.1	0.827	0.786	0.773	0.829	0.556
Q7L9L4-2	Isoform 2 of MOB kinase activator 1B OS=Homo sapiens GN=MOB1B	4	25.5	0.797	0.799	0.82	1.032	0.836
Q7L8L6	FAST kinase domain-containing protein 5, mitochondrial OS=Homo sapiens GN=FASTKD5 PE=1 SV=1	2	86.5	0.832	1.148	0.959	0.667	0.786
Q7L8C5	Synaptotagmin-13 OS=Homo sapiens GN=SYT13 PE=1 SV=1	2	46.9	0.889	0.813	0.946	0.991	0.988
Q7L804-2	Isoform 2 of Rab11 family-interacting protein 2 OS=Homo sapiens GN=RAB11FIP2	14	60.6	0.949	0.947	0.891	0.812	0.691
Q7L775	EPM2A-interacting protein 1 OS=Homo sapiens GN=EPM2AIP1 PE=1 SV=1	6	70.3	0.979	0.896	0.873	0.887	0.807
Q7L5N7	Lysophosphatidylcholine acyltransferase 2 OS=Homo sapiens GN=LPCAT2 PE=1 SV=1	10	60.2	1.105	1.142	0.965	1.121	1.263
Q7L5N1	COP9 signalosome complex subunit 6 OS=Homo sapiens GN=COPS6 PE=1 SV=1	21	36.1	0.99	0.972	1.102	1.128	1.276
Q7L5D6	Golgi to ER traffic protein 4 homolog OS=Homo sapiens GN=GET4 PE=1 SV=1	6	36.5	0.968	0.935	0.965	0.894	0.844
Q7L5A8	Fatty acid 2-hydroxylase OS=Homo sapiens GN=FA2H PE=1 SV=1	2	42.8	1.25	1.251	1.2	1.037	1.264
Q7L592	Protein arginine methyltransferase NDUFAF7, mitochondrial OS=Homo sapiens GN=NDUFAF7 PE=1 SV=1	4	49.2	0.943	0.984	0.931	0.714	0.698
Q7L4Q3	Glutathione peroxidase OS=Homo sapiens GN=GPX1 PE=2 SV=1	30	22.1	0.964	1.128	1.101	1.208	1.171
Q7L3T8	Probable proline--tRNA ligase, mitochondrial OS=Homo sapiens GN=PARS2 PE=1 SV=1	2	53.2
Q7L2H7	Eukaryotic translation initiation factor 3 subunit M OS=Homo sapiens GN=EIF3M PE=1 SV=1	6	42.5	1.004	0.998	0.999	0.998	0.963
Q7L2E3-2	Isoform 2 of Putative ATP-dependent RNA helicase DHX30 OS=Homo sapiens GN=DHX30	23	136	0.958	0.949	0.927	0.894	0.853
Q7L273	BTB/POZ domain-containing protein KCTD9 OS=Homo sapiens GN=KCTD9 PE=1 SV=1	2	42.5	1.193	0.995	1.39	1.439	1.039
Q7L1Q6-3	Isoform 3 of Basic leucine zipper and W2 domain-containing protein 1 OS=Homo sapiens GN=BZW1	16	51.2	1.01	0.961	1.072	1.023	1.078
Q7L1I2	Synaptic vesicle glycoprotein 2B OS=Homo sapiens GN=SV2B PE=1 SV=1	67	77.4	0.732	0.892	0.781	0.846	0.594
Q7L0Y3	Mitochondrial ribonuclease P protein 1 OS=Homo sapiens GN=TRMT10C PE=1 SV=2	9	47.3	0.94	0.92	0.848	0.667	0.703
Q7L099-2	Isoform 2 of Protein RUFY3 OS=Homo sapiens GN=RUFY3	68	55.8	1.041	0.924	0.856	0.979	0.844
Q7KZI7-11	Isoform 11 of Serine/threonine-protein kinase MARK2 OS=Homo sapiens GN=MARK2	38	86.1
Q7KZI7	Serine/threonine-protein kinase MARK2 OS=Homo sapiens GN=MARK2 PE=1 SV=2	38	87.9	0.85	0.828	0.77	0.687	0.613
Q7KZ85	Transcription elongation factor SPT6 OS=Homo sapiens GN=SUPT6H PE=1 SV=2	2	198.9	0.654	0.897	0.652	0.683	0.6
Q7KYR7	Butyrophilin subfamily 2 member A1 OS=Homo sapiens GN=BTN2A1 PE=1 SV=3	10	59.6	1.003	1.129	0.991	1.052	0.936
Q76NI1	Protein very KIND OS=Homo sapiens GN=KNDC1 PE=2 SV=2	20	191.3	0.901	0.982	0.842	0.87	0.785
Q76N89	E3 ubiquitin-protein ligase HECW1 OS=Homo sapiens GN=HECW1 PE=1 SV=3	10	179.4	0.958	0.93	0.84	0.802	0.672
Q76LA1	CSTB protein OS=Homo sapiens GN=CSTB PE=2 SV=1	18	11.1	0.963	0.99	0.902	0.498	0.47
Q765P7	MTSS1-like protein OS=Homo sapiens GN=MTSS1L PE=1 SV=1	28	79.9	1.065	0.971	1.088	1.101	1.14
Q75T13	GPI inositol-deacylase OS=Homo sapiens GN=PGAP1 PE=1 SV=1	4	105.3	0.658	0.686	0.749	0.631	0.542
Q71UF1	Aconitate hydratase, mitochondrial OS=Homo sapiens GN=ACO2 PE=3 SV=1	362	85.6	1.033	1.025	0.955	0.984	0.882
Q71UA4	Adenylosuccinate lyase OS=Homo sapiens PE=3 SV=1	10	54.8	1.256	1.075	1.173	1.16	1.107
Q71U36	Tubulin alpha-1A chain OS=Homo sapiens GN=TUBA1A PE=1 SV=1	1103	50.1	0.997	0.93	0.928	0.856	0.846
Q71RG4	Transmembrane and ubiquitin-like domain-containing protein 2 OS=Homo sapiens GN=TMUB2 PE=1 SV=2	2	33.8	0.904	1.032	0.926	0.953	0.928
Q71RC2-4	Isoform 4 of La-related protein 4 OS=Homo sapiens GN=LARP4	2	81.2
Q71H61	Immunoglobulin-like domain-containing receptor 2 OS=Homo sapiens GN=ILDR2 PE=2 SV=1	2	71.2
Q712K3	Ubiquitin-conjugating enzyme E2 R2 OS=Homo sapiens GN=UBE2R2 PE=1 SV=1	2	27.1	0.655	0.64	0.753	0.741	0.652
Q70YC5-3	Isoform 3 of Protein ZNF365 OS=Homo sapiens GN=ZNF365	2	52.5	0.927	0.986	0.812	0.72	0.64
Q70IA6-3	Isoform 3 of MOB kinase activator 2 OS=Homo sapiens GN=MOB2	4	30.2	0.761	0.823	0.767	0.745	0.637
Q70EL1	Inactive ubiquitin carboxyl-terminal hydrolase 54 OS=Homo sapiens GN=USP54 PE=1 SV=4	4	187.3	1.402	1.127	1.147	1.285	1.994
Q70CQ4	Ubiquitin carboxyl-terminal hydrolase 31 OS=Homo sapiens GN=USP31 PE=2 SV=2	28	146.6	1.062	0.993	1.026	0.927	1.052
Q709C8	Vacuolar protein sorting-associated protein 13C OS=Homo sapiens GN=VPS13C PE=1 SV=1	57	422.1	0.95	0.927	0.865	0.947	0.923
Q6ZWT7	Lysophospholipid acyltransferase 2 OS=Homo sapiens GN=MBOAT2 PE=2 SV=2	4	59.5	2.168	1.864	1.589	1.238	1.719
Q6ZWC0	cDNA FLJ41343 fis, clone BRAWH2001973 OS=Homo sapiens PE=2 SV=1	2	12.8	0.977	1.238	0.786	0.784	0.739
Q6ZWB6	BTB/POZ domain-containing protein KCTD8 OS=Homo sapiens GN=KCTD8 PE=2 SV=1	20	52.4	0.979	1.08	1.047	1.05	0.951
Q6ZVM7-5	Isoform 5 of TOM1-like protein 2 OS=Homo sapiens GN=TOM1L2	54	53.3	0.87	0.914	0.935	0.901	0.921
Q6ZVM7	TOM1-like protein 2 OS=Homo sapiens GN=TOM1L2 PE=1 SV=1	57	55.5	0.746	0.843	0.813	0.682	0.723
Q6ZVL6	UPF0606 protein KIAA1549L OS=Homo sapiens GN=KIAA1549L PE=2 SV=2	35	198.9	0.883	0.976	0.817	0.757	0.689
Q6ZVK8	8-oxo-dGDP phosphatase NUDT18 OS=Homo sapiens GN=NUDT18 PE=1 SV=3	2	35.5	1.063	1.01	1.045	1.019	0.903
Q6ZV89	SH2 domain-containing protein 5 OS=Homo sapiens GN=SH2D5 PE=1 SV=2	2	46.8	0.992	0.832	1.006	1.625	1.307
Q6ZV29-5	Isoform 5 of Patatin-like phospholipase domain-containing protein 7 OS=Homo sapiens GN=PNPLA7	2	148.4	0.891	0.993	0.817	1.165	0.774
Q6ZUY8	Lipase OS=Homo sapiens PE=2 SV=1	4	45.4	0.687	0.829	0.878	1.573	1.636
Q6ZU35	Uncharacterized protein KIAA1211 OS=Homo sapiens GN=KIAA1211 PE=1 SV=3	6	136.7	1.026	1.257	0.787	0.893	0.517
Q6ZTW0	Tubulin polyglutamylase complex subunit 1 OS=Homo sapiens GN=TPGS1 PE=1 SV=2	4	31.3	1.019	1.124	0.98	0.871	0.864
Q6ZT62	cDNA FLJ44925 fis, clone BRAMY3014613, highly similar to Homo sapiens SH3-domain binding protein 1 (SH3BP1) OS=Homo sapiens PE=2 SV=1	14	66.1	0.916	0.95	0.88	0.895	0.925
Q6ZT12-4	Isoform 4 of E3 ubiquitin-protein ligase UBR3 OS=Homo sapiens GN=UBR3	6	215.8	0.859	0.857	0.79	0.733	0.644
Q6ZSY5	Protein phosphatase 1 regulatory subunit 3F OS=Homo sapiens GN=PPP1R3F PE=1 SV=3	8	82.7	0.852	0.93	0.913	0.682	0.65
Q6ZSS7	Major facilitator superfamily domain-containing protein 6 OS=Homo sapiens GN=MFSD6 PE=1 SV=2	15	88	0.84	0.981	0.915	0.922	0.83
Q6ZSP3	Phospholipid-transporting ATPase OS=Homo sapiens PE=2 SV=1	16	133.5	1.097	1.039	1.203	1.225	1.104
Q6ZSJ8	Uncharacterized protein C1orf122 OS=Homo sapiens GN=C1orf122 PE=4 SV=2	4	11.5	0.899	0.95	0.887	1.011	1.016
Q6ZRP7	Sulfhydryl oxidase 2 OS=Homo sapiens GN=QSOX2 PE=1 SV=3	2	77.5	1.013	1.056	1.115	1.129	1.083
Q6ZR64	HBV PreS1-transactivated protein 1 OS=Homo sapiens GN=MXRA7 PE=1 SV=1	4	23.4	1.508	1.503	1.392	1.293	1.256
Q6ZN44	Netrin receptor UNC5A OS=Homo sapiens GN=UNC5A PE=1 SV=3	2	92.9
Q6ZMX3	cDNA FLJ16614 fis, clone TESTI4013365 OS=Homo sapiens PE=2 SV=1	4	69.9	0.518	0.622	0.608	0.449	0.468
Q6ZMW3	Echinoderm microtubule-associated protein-like 6 OS=Homo sapiens GN=EML6 PE=2 SV=2	4	217.8	1.079	1.176	1.105	1.098	1.254
Q6ZMI0	Protein phosphatase 1 regulatory subunit 21 OS=Homo sapiens GN=PPP1R21 PE=1 SV=1	52	88.3	1.058	1.011	1.04	0.928	0.972
Q6ZMF6	Glycerol-3-phosphate acyltransferase 1, mitochondrial OS=Homo sapiens PE=2 SV=1	2	93.7	0.746	1.04	0.965	1.09	1.073
Q6YP21	Kynurenine--oxoglutarate transaminase 3 OS=Homo sapiens GN=KYAT3 PE=1 SV=1	26	51.4	0.826	0.784	0.836	0.795	0.768
Q6YN16	Hydroxysteroid dehydrogenase-like protein 2 OS=Homo sapiens GN=HSDL2 PE=1 SV=1	34	45.4	0.917	0.963	0.931	1.059	1
Q6YHK3	CD109 antigen OS=Homo sapiens GN=CD109 PE=1 SV=2	10	161.6	1.051	0.962	1.218	1.469	1.27
Q6Y288	Beta-1,3-glucosyltransferase OS=Homo sapiens GN=B3GLCT PE=1 SV=2	2	56.5	1.051	1.165	1.325	1.086	1.235
Q6Y1H2	Very-long-chain (3R)-3-hydroxyacyl-CoA dehydratase 2 OS=Homo sapiens GN=HACD2 PE=1 SV=1	14	28.4	0.827	0.916	0.886	0.901	0.682
Q6XQN6	Nicotinate phosphoribosyltransferase OS=Homo sapiens GN=NAPRT PE=1 SV=2	4	57.5	1.53	0.849	0.845	0.892	0.945
Q6X4W1	NMDA receptor synaptonuclear signaling and neuronal migration factor OS=Homo sapiens GN=NSMF PE=1 SV=1	8	60.1	1.049	1.022	0.923	0.942	1.165
Q6VY07-2	Isoform 2 of Phosphofurin acidic cluster sorting protein 1 OS=Homo sapiens GN=PACS1	42	109.3	1.001	0.938	0.985	0.969	0.884
Q6VFQ6	Hemoglobin beta chain (Fragment) OS=Homo sapiens GN=HBB PE=3 SV=1	89	4.5	0.887	0.592	0.757	0.906	0.974
Q6VEQ5	WAS protein family homolog 2 OS=Homo sapiens GN=WASH2P PE=2 SV=2	15	50.3	0.838	1.098	0.454	1.009	1.699
Q6VAB6	Kinase suppressor of Ras 2 OS=Homo sapiens GN=KSR2 PE=1 SV=2	2	107.6	1.069	1.084	1.02	0.944	0.877
Q6UXU4	Germ cell-specific gene 1-like protein OS=Homo sapiens GN=GSG1L PE=1 SV=2	2	36.8	1.155	1.204	0.968	0.927	0.888
Q6UXK2	Immunoglobulin superfamily containing leucine-rich repeat protein 2 OS=Homo sapiens GN=ISLR2 PE=2 SV=1	6	78.9	1.091	1.065	1.119	1.306	1.279
Q6UXH1-5	Isoform 5 of Cysteine-rich with EGF-like domain protein 2 OS=Homo sapiens GN=CRELD2	2	43.5	0.888	1.068	1.085	1.399	1.614
Q6UXG2	UPF0577 protein KIAA1324 OS=Homo sapiens GN=KIAA1324 PE=2 SV=2	4	111.3	1.062	1.125	1.063	1.055	0.969
Q6UXB8	Peptidase inhibitor 16 OS=Homo sapiens GN=PI16 PE=1 SV=1	8	49.4	1.757	1.342	1.924	2.346	3.34
Q6UX71	Plexin domain-containing protein 2 OS=Homo sapiens GN=PLXDC2 PE=1 SV=1	2	59.5	0.831	0.909	0.98	1.495	1.043
Q6UWR7	Ectonucleotide pyrophosphatase/phosphodiesterase family member 6 OS=Homo sapiens GN=ENPP6 PE=1 SV=2	37	50.2	1.042	1.187	1.003	1.614	2.005
Q6UWP8	Suprabasin OS=Homo sapiens GN=SBSN PE=1 SV=2	2	60.5	1.082	0.783	0.91	0.85	1.135
Q6UWP7	Lysocardiolipin acyltransferase 1 OS=Homo sapiens GN=LCLAT1 PE=1 SV=1	6	48.9	0.925	1.072	0.955	0.845	0.943
Q6UW78	Ubiquinol-cytochrome-c reductase complex assembly factor 3 OS=Homo sapiens GN=UQCC3 PE=1 SV=2	2	10.1
Q6UW68	Transmembrane protein 205 OS=Homo sapiens GN=TMEM205 PE=1 SV=1	6	21.2	0.979	1.131	0.908	0.91	0.865
Q6UVY6	DBH-like monooxygenase protein 1 OS=Homo sapiens GN=MOXD1 PE=1 SV=1	7	69.6	0.986	1.256	0.957	1.031	1.011
Q6UVK1	Chondroitin sulfate proteoglycan 4 OS=Homo sapiens GN=CSPG4 PE=1 SV=2	10	250.4	1.199	0.997	0.997	0.95	0.873
Q6UUV9	CREB-regulated transcription coactivator 1 OS=Homo sapiens GN=CRTC1 PE=1 SV=2	10	67.3	0.976	0.91	0.931	0.786	0.956
Q6ULP2	Aftiphilin OS=Homo sapiens GN=AFTPH PE=1 SV=2	4	102.1	1.006	0.919	0.916	0.738	0.852
Q6U8A4	Ubiquitin-specific protease 7 isoform (Fragment) OS=Homo sapiens PE=2 SV=1	68	128.9	0.862	0.879	0.897	0.797	0.767
Q6U841	Sodium-driven chloride bicarbonate exchanger OS=Homo sapiens GN=SLC4A10 PE=2 SV=1	67	125.9	0.998	1.077	0.85	0.699	0.674
Q6U2L6	C4B (Fragment) OS=Homo sapiens GN=C4B PE=4 SV=1	3	10.2	0.926	0.87	1.075	1.591	1.455
Q6T4P5-3	Isoform 3 of Phospholipid phosphatase-related protein type 3 OS=Homo sapiens GN=PLPPR3	4	78.9	0.999	1.001	0.884	1.095	0.868
Q6SZW1	Sterile alpha and TIR motif-containing protein 1 OS=Homo sapiens GN=SARM1 PE=1 SV=1	6	79.3	0.858	0.952	0.79	0.515	0.604
Q6QNY1	Biogenesis of lysosome-related organelles complex 1 subunit 2 OS=Homo sapiens GN=BLOC1S2 PE=1 SV=1	6	16	1.038	1.093	1.202	1.015	1.13
Q6QEF8	Coronin-6 OS=Homo sapiens GN=CORO6 PE=1 SV=2	10	52.7	0.879	0.892	0.868	0.788	0.886
Q6PUV4	Complexin-2 OS=Homo sapiens GN=CPLX2 PE=2 SV=2	40	15.4	1.128	1.19	1.217	1.141	1.126
Q6PL24	Protein TMED8 OS=Homo sapiens GN=TMED8 PE=1 SV=1	8	35.7	0.997	0.842	0.927	0.918	0.814
Q6PKG0	La-related protein 1 OS=Homo sapiens GN=LARP1 PE=1 SV=2	59	123.4	1.023	1.007	0.931	0.792	0.781
Q6PKC0	GMP reductase OS=Homo sapiens GN=GMPR2 PE=2 SV=1	19	45	1.019	1.069	1.198	1.619	1.506
Q6PK82	AP3D1 protein (Fragment) OS=Homo sapiens GN=AP3D1 PE=2 SV=1	38	98.5	0.795	0.683	0.618	0.801	0.891
Q6PJV4	THRAP3 protein (Fragment) OS=Homo sapiens GN=THRAP3 PE=2 SV=1	10	41.8	0.34	0.651	0.443	0.461	0.452
Q6PJT7	Zinc finger CCCH domain-containing protein 14 OS=Homo sapiens GN=ZC3H14 PE=1 SV=1	1	82.8
Q6PJI9	WD repeat-containing protein 59 OS=Homo sapiens GN=WDR59 PE=1 SV=2	2	109.7	0.935	1.006	0.99	0.925	0.886
Q6PIL6	Kv channel-interacting protein 4 OS=Homo sapiens GN=KCNIP4 PE=1 SV=1	8	28.7	1	1.059	0.945	1.211	1.348
Q6PIK1	IGL@ protein OS=Homo sapiens GN=IGL@ PE=1 SV=1	35	24.8	1.309	1.013	1.171	1.126	1.192
Q6PIJ6	F-box only protein 38 OS=Homo sapiens GN=FBXO38 PE=1 SV=3	2	133.9	1.228	1.198	1.069	0.945	0.972
Q6PII5-2	Isoform 2 of Hydroxyacylglutathione hydrolase-like protein OS=Homo sapiens GN=HAGHL	2	31.2	0.863	0.899	0.971	1.166	1.069
Q6PI78	Transmembrane protein 65 OS=Homo sapiens GN=TMEM65 PE=1 SV=2	47	25.5	0.972	1.179	0.953	0.913	0.941
Q6PI25	Protein cornichon homolog 2 OS=Homo sapiens GN=CNIH2 PE=1 SV=1	2	18.9	0.676	0.757	0.693	0.733	0.641
Q6PHR2	Serine/threonine-protein kinase ULK3 OS=Homo sapiens GN=ULK3 PE=1 SV=2	10	53.4	0.852	0.853	0.96	0.782	0.815
Q6PGP7	Tetratricopeptide repeat protein 37 OS=Homo sapiens GN=TTC37 PE=1 SV=1	22	175.4	0.78	0.921	0.853	0.959	0.915
Q6PD74	Alpha- and gamma-adaptin-binding protein p34 OS=Homo sapiens GN=AAGAB PE=1 SV=1	2	34.6	0.997	2.698	1.584	2.428	1.478
Q6PCE3	Glucose 1,6-bisphosphate synthase OS=Homo sapiens GN=PGM2L1 PE=1 SV=3	60	70.4	0.671	0.604	0.753	0.771	0.649
Q6PCE2	ARL10 protein OS=Homo sapiens GN=ARL10 PE=2 SV=1	2	31.2	0.917	0.818	0.892	0.708	0.624
Q6PCB7	Long-chain fatty acid transport protein 1 OS=Homo sapiens GN=SLC27A1 PE=2 SV=1	14	71.1	0.864	0.967	0.955	1.068	0.912
Q6PCB6	Protein ABHD17C OS=Homo sapiens GN=ABHD17C PE=2 SV=2	2	35.8	0.947	1.067	0.915	0.999	1.012
Q6P9F7	Volume-regulated anion channel subunit LRRC8B OS=Homo sapiens GN=LRRC8B PE=1 SV=2	6	92.3	0.941	1.009	0.922	1.021	1.073
Q6P6C2-1	Isoform 1 of RNA demethylase ALKBH5 OS=Homo sapiens GN=ALKBH5	2	52.2	1.551	1.042	2.197	1.081	0.964
Q6P5V6	SNX5 protein (Fragment) OS=Homo sapiens GN=SNX5 PE=2 SV=1	26	47.4	1.038	1.113	1.058	1.212	1.112
Q6P587	Acylpyruvase FAHD1, mitochondrial OS=Homo sapiens GN=FAHD1 PE=1 SV=2	17	24.8	0.7	0.93	0.825	0.94	0.898
Q6P4R2	Protocadherin alpha subfamily C, 2 OS=Homo sapiens GN=PCDHAC2 PE=2 SV=1	8	109.4	1.086	0.987	0.928	0.852	0.955
Q6P4E1-4	Isoform 4 of Protein CASC4 OS=Homo sapiens GN=CASC4	6	49.5
Q6P4A7	Sideroflexin-4 OS=Homo sapiens GN=SFXN4 PE=1 SV=1	4	38	0.863	0.896	1.194	1.163	1.001
Q6P499	NIPA-like protein 3 OS=Homo sapiens GN=NIPAL3 PE=1 SV=1	2	44.7	1.095	0.998	0.997	0.941	1.165
Q6P2Q9	Pre-mRNA-processing-splicing factor 8 OS=Homo sapiens GN=PRPF8 PE=1 SV=2	9	273.4	0.846	0.912	0.849	0.801	0.75
Q6P2Q0	ABCB9 protein OS=Homo sapiens GN=ABCB9 PE=1 SV=1	4	84.7	0.9	1.029	0.848	0.831	0.907
Q6P2I3	Fumarylacetoacetate hydrolase domain-containing protein 2B OS=Homo sapiens GN=FAHD2B PE=1 SV=1	22	34.6	0.971	0.99	1.004	1.045	1.135
Q6P2H3	Centrosomal protein of 85 kDa OS=Homo sapiens GN=CEP85 PE=1 SV=1	3	85.6	0.912	0.686	1.272	1.829	2.404
Q6P2E9	Enhancer of mRNA-decapping protein 4 OS=Homo sapiens GN=EDC4 PE=1 SV=1	12	151.6	0.891	0.855	0.856	0.858	0.737
Q6P1S2	Protein C3orf33 OS=Homo sapiens GN=C3orf33 PE=1 SV=2	4	33.7	0.845	0.982	1.02	0.977	0.91
Q6P1Q0-7	Isoform 7 of LETM1 domain-containing protein 1 OS=Homo sapiens GN=LETMD1	4	43.3	0.54	0.594	0.545	0.489	0.521
Q6P1N9	Putative deoxyribonuclease TATDN1 OS=Homo sapiens GN=TATDN1 PE=1 SV=2	17	33.6	0.899	0.921	0.943	1.04	1.026
Q6P1N1	PPM2C protein (Fragment) OS=Homo sapiens GN=PPM2C PE=2 SV=1	14	68.4	0.626	0.526	0.522	0.561	0.565
Q6P1N0	Coiled-coil and C2 domain-containing protein 1A OS=Homo sapiens GN=CC2D1A PE=1 SV=1	20	104	1.007	0.867	0.969	0.877	0.732
Q6P1M3	Lethal(2) giant larvae protein homolog 2 OS=Homo sapiens GN=LLGL2 PE=1 SV=2	2	113.4
Q6P1L8	39S ribosomal protein L14, mitochondrial OS=Homo sapiens GN=MRPL14 PE=1 SV=1	2	15.9	0.707	0.77	0.881	0.587	1.025
Q6P1L5	Protein FAM117B OS=Homo sapiens GN=FAM117B PE=1 SV=2	7	61.9	1.016	0.927	0.966	0.811	0.732
Q6P161	39S ribosomal protein L54, mitochondrial OS=Homo sapiens GN=MRPL54 PE=1 SV=1	2	15.8	0.914	1.158	1.017	0.805	0.81
Q6NZI2	Polymerase I and transcript release factor OS=Homo sapiens GN=PTRF PE=1 SV=1	24	43.5	0.889	0.93	0.932	0.928	0.917
Q6NYC5	MAP2 protein (Fragment) OS=Homo sapiens GN=MAP2 PE=2 SV=1	435	116.3	1.047	0.893	0.882	0.954	0.812
Q6NXT6	Transmembrane anterior posterior transformation protein 1 homolog OS=Homo sapiens GN=TAPT1 PE=1 SV=1	10	64.2	0.872	0.994	0.923	0.906	1.006
Q6NXR4	TELO2-interacting protein 2 OS=Homo sapiens GN=TTI2 PE=1 SV=1	2	56.9	0.967	1.318	0.908	0.933	0.824
Q6NXG4	WDR13 protein (Fragment) OS=Homo sapiens GN=WDR13 PE=2 SV=1	16	58.7	0.779	0.765	0.77	0.802	0.625
Q6NX51	Exocyst complex component 4 OS=Homo sapiens GN=EXOC4 PE=2 SV=1	52	110.4	0.967	0.949	0.921	0.82	0.83
Q6NW29	RWD domain-containing protein 4 OS=Homo sapiens GN=RWDD4 PE=1 SV=3	4	21.2	0.822	0.902	0.817	0.85	0.72
Q6NVY4	BNIP3 protein (Fragment) OS=Homo sapiens GN=BNIP3 PE=2 SV=1	8	26.4	0.849	0.892	0.831	0.808	0.812
Q6NVY1	3-hydroxyisobutyryl-CoA hydrolase, mitochondrial OS=Homo sapiens GN=HIBCH PE=1 SV=2	32	43.5	0.822	0.876	0.956	0.926	0.86
Q6NVH9	Galectin OS=Homo sapiens GN=LGALS3 PE=1 SV=1	15	26.2	0.373	0.469	2.066	0.281	0.234
Q6NVC0	SLC25A5 protein (Fragment) OS=Homo sapiens GN=SLC25A5 PE=2 SV=1	134	35.3	0.853	1.17	0.935	0.918	0.924
[truncated: 4,310 more rows]

## Sheet: BW_TMT6_ReplicateB
Accession	Protein Description	# PSMs	MW [kDa]	Abundance Ratio: (F1, 127) / (F1, 126)	Abundance Ratio: (F1, 128) / (F1, 126)	Abundance Ratio: (F1, 129) / (F1, 126)	Abundance Ratio: (F1, 130) / (F1, 126)	Abundance Ratio: (F1, 131) / (F1, 126)
X6RLX0	ELKS/Rab6-interacting/CAST family member 1 OS=Homo sapiens GN=ERC1 PE=1 SV=1	35	128.4	1.064	0.98	1.037	0.931	0.846
X6RKN2	Neurofascin (Fragment) OS=Homo sapiens GN=NFASC PE=1 SV=1	375	131.1	1.109	1.09	1.044	0.949	1.02
X6RAY8	39S ribosomal protein L4, mitochondrial OS=Homo sapiens GN=MRPL4 PE=1 SV=1	2	39.6	0.508	1.14	0.449	0.279	0.01
X6RAL5	Histone deacetylase complex subunit SAP18 OS=Homo sapiens GN=SAP18 PE=1 SV=1	6	19.5	1.022	0.972	0.825	0.713	0.765
X6R8A1	Carboxypeptidase OS=Homo sapiens GN=CTSA PE=1 SV=1	6	56.2	0.842	0.868	1.002	0.938	1.027
X6R7I6	Pancreatic progenitor cell differentiation and proliferation factor OS=Homo sapiens GN=PPDPF PE=1 SV=1	4	14.7	2.774	1.668	1.67	1.384	1.715
X6R4W8	BUB3-interacting and GLEBS motif-containing protein ZNF207 OS=Homo sapiens GN=ZNF207 PE=1 SV=1	4	52.6	0.636	0.839	0.632	0.796	0.623
X5M224	MHC class I antigen OS=Homo sapiens GN=HLA-C PE=3 SV=1	10	41	1.132	1.398	1.207	2.075	0.659
X5DR09	General transcription factor IIi isoform A (Fragment) OS=Homo sapiens GN=GTF2I PE=2 SV=1	14	112.3	0.886	0.899	0.85	0.792	0.773
X5DNV3	Neuroligin 3 isoform A (Fragment) OS=Homo sapiens GN=NLGN3 PE=2 SV=1	10	93.8	1.01	0.979	0.974	0.858	0.856
X5DNM4	Lactoylglutathione lyase (Fragment) OS=Homo sapiens GN=GLO1 PE=2 SV=1	30	20.8	0.964	0.945	0.987	1.067	0.93
X5DNL6	Gamma-aminobutyric acid A receptor beta 1 isoform A (Fragment) OS=Homo sapiens GN=GABRB1 PE=2 SV=1	22	54.2	0.467	0.507	0.455	0.398	0.352
X5DNI1	Collapsin response mediator protein 1 isoform A (Fragment) OS=Homo sapiens GN=CRMP1 PE=2 SV=1	235	74.2	1.019	0.877	0.935	0.896	0.787
X5DNA9	HCG2002594, isoform CRA_d (Fragment) OS=Homo sapiens GN=SEPT5 PE=2 SV=1	122	42.8	0.776	0.824	0.717	0.673	0.524
X5D9D2	Tuberous sclerosis 1 isoform A (Fragment) OS=Homo sapiens GN=TSC1 PE=2 SV=1	12	129.7
X5D963	Myotubularin related protein 10 isoform C (Fragment) OS=Homo sapiens GN=MTMR10 PE=2 SV=1	6	88.2	0.801	0.851	0.831	1.024	1.127
X5D945	Harvey rat sarcoma viral oncoprotein isoform A (Fragment) OS=Homo sapiens GN=HRAS PE=2 SV=1	49	21.3	1.306	1.269	1.267	1.22	1.313
X5D8X5	Cadherin 10 type 2 isoform A (Fragment) OS=Homo sapiens GN=CDH10 PE=2 SV=1	24	88.4	0.98	0.988	0.911	0.777	0.717
X5D8T4	Aldehyde dehydrogenase 5 family member A1 isoform B (Fragment) OS=Homo sapiens GN=ALDH5A1 PE=2 SV=1	91	57.2	0.816	1.789	1.014	1.219	1.316
X5D7F5	Gamma-aminobutyric acid A receptor alpha 4 isoform A (Fragment) OS=Homo sapiens GN=GABRA4 PE=2 SV=1	9	61.6	0.897	1.066	0.91	0.856	0.765
X5D2L1	Hydroxysteroid 11-beta dehydrogenase 1 isoform A (Fragment) OS=Homo sapiens GN=HSD11B1 PE=2 SV=1	6	32.4	1.001	1.064	0.939	1.018	1.419
W0S1J7	PJA2/FER fusion protein OS=Homo sapiens GN=Pe7Fe14 PE=2 SV=1	16	96.2	1.189	1.189	1.102	0.923	0.988
V9HWK4	Epididymis luminal protein 162 OS=Homo sapiens GN=HEL162 PE=2 SV=1	10	73.6	0.619	1.109	0.699	0.579	0.467
V9HWK2	Epididymis luminal protein 114 OS=Homo sapiens GN=HEL114 PE=2 SV=1	129	123.7	1.039	1.022	1.05	1.224	1.091
V9HWK0	Signal recognition particle subunit SRP72 OS=Homo sapiens GN=HEL103 PE=2 SV=1	27	74.6	0.908	0.922	0.892	0.818	0.839
V9HWJ5	Nicotinate-nucleotide pyrophosphorylase [carboxylating] OS=Homo sapiens GN=HEL-S-90n PE=2 SV=1	6	30.8	0.935	0.947	1.028	1.113	1.066
V9HWJ1	Glutathione synthetase OS=Homo sapiens GN=HEL-S-64p PE=2 SV=1	35	52.4	0.981	1.015	1.012	1.049	1.032
V9HWI3	Cathepsin D (Lysosomal aspartyl peptidase), isoform CRA_a OS=Homo sapiens GN=HEL-S-130P PE=2 SV=1	121	44.5	1.066	1.017	1.248	1.494	1.283
V9HWH2	Creatine kinase brain isoform 1 OS=Homo sapiens GN=HEL-S-29 PE=2 SV=1	604	42.6	0.936	0.883	0.942	0.907	0.9
V9HWH1	Epididymis luminal protein 57 OS=Homo sapiens GN=HEL57 PE=2 SV=1	10	42.7	0.938	0.849	0.81	0.89	0.992
V9HWG3	Epididymis secretory protein Li 45 OS=Homo sapiens GN=HEL-S-45 PE=2 SV=1	8	77.3	0.767	0.944	0.918	1.002	0.952
V9HWF8	Epididymis secretory protein Li 41 OS=Homo sapiens GN=HEL-S-41 PE=2 SV=1	2	33.2	0.839	0.899	0.935	1.175	0.931
V9HWE9	Epididymis secretory protein Li 22 OS=Homo sapiens GN=HEL-S-22 PE=2 SV=1	111	23.3	1.087	0.942	1.11	1.291	1.27
V9HWE8	Epididymis secretory sperm binding protein Li 47e OS=Homo sapiens GN=HEL-S-47e PE=2 SV=1	27	23.2	1.104	0.9	0.966	0.931	0.975
V9HWE1	Epididymis luminal protein 113 OS=Homo sapiens GN=HEL113 PE=2 SV=1	294	53.6	1.058	1.067	1.182	1.947	1.256
V9HWE0	Annexin OS=Homo sapiens GN=HEL-S-7 PE=2 SV=1	133	35.9	0.96	0.988	1.173	1.706	1.58
V9HWD8	Epididymis secretory sperm binding protein Li 163pA OS=Homo sapiens GN=HEL-S-163pA PE=2 SV=1	9	54.2	1.14	1.132	1.131	1.156	1.239
V9HWD3	Epididymis luminal protein 117 OS=Homo sapiens GN=HEL117 PE=2 SV=1	8	54.8	0.918	1.209	1.001	1.048	0.962
V9HWC9	Superoxide dismutase [Cu-Zn] OS=Homo sapiens GN=HEL-S-44 PE=2 SV=1	129	15.9	1.231	0.977	1.082	1.153	1.187
V9HWC7	Epididymis secretory sperm binding protein Li 128m OS=Homo sapiens GN=HEL-S-128m PE=2 SV=1	105	25	0.783	0.85	0.967	1.295	1.074
V9HWC5	Epididymis secretory protein Li 36 OS=Homo sapiens GN=HEL-S-36 PE=2 SV=1	55	31.8	0.861	0.947	0.889	1.055	0.972
V9HWB8	Pyruvate kinase OS=Homo sapiens GN=HEL-S-30 PE=1 SV=1	453	57.9	1.014	1.149	1.195	1.739	1.878
V9HWB4	Epididymis secretory sperm binding protein Li 89n OS=Homo sapiens GN=HEL-S-89n PE=2 SV=1	265	72.3	1.054	1.094	0.993	1.016	1.013
V9HWA9	Epididymis secretory sperm binding protein Li 62p OS=Homo sapiens GN=HEL-S-62p PE=2 SV=1	115	187	1.169	1.102	1.249	1.688	1.433
V9HWA6	Epididymis luminal protein 32 OS=Homo sapiens GN=HEL32 PE=2 SV=1	48	18.5	0.802	0.807	0.882	0.953	0.871
V9HW91	Epididymis secretory sperm binding protein Li 8a OS=Homo sapiens GN=HEL-S-8a PE=2 SV=1	27	30.6	1.139	1.015	1.306	1.154	1.099
V9HW90	Epididymis luminal protein 75 OS=Homo sapiens GN=HEL-75 PE=2 SV=1	30	56.2	0.947	0.941	1.023	1.278	1.127
V9HW88	Calreticulin, isoform CRA_b OS=Homo sapiens GN=HEL-S-99n PE=2 SV=1	75	48.1	1.216	1.095	1.253	1.13	1.26
V9HW87	Abhydrolase domain containing 14B, isoform CRA_a OS=Homo sapiens GN=HEL-S-299 PE=2 SV=1	8	22.3	0.888	0.895	1.034	1.24	1.085
V9HW80	Epididymis luminal protein 220 OS=Homo sapiens GN=HEL-S-70 PE=2 SV=1	281	89.3	1.127	1.134	1.144	1.23	1.204
V9HW63	Epididymis secretory sperm binding protein Li 97n OS=Homo sapiens GN=HEL-S-97n PE=2 SV=1	20	30.5	0.787	0.841	1.005	1.112	1.263
V9HW62	Lactoylglutathione lyase OS=Homo sapiens GN=HEL-S-74 PE=2 SV=1	26	20.7	1.023	0.801	1.103	0.95	1.073
V9HW53	Dimethylarginine dimethylaminohydrolase 2, isoform CRA_a OS=Homo sapiens GN=HEL-S-277 PE=1 SV=1	48	29.6	1.154	1.018	1.257	1.402	1.516
V9HW48	SH3 domain-binding glutamic acid-rich-like protein OS=Homo sapiens GN=HEL-S-115 PE=2 SV=1	39	12.8	0.991	1.032	1.051	1.271	1.361
V9HW44	Epididymis secretory protein Li 303 OS=Homo sapiens GN=HEL-S-303 PE=2 SV=1	13	25.6	0.934	0.858	0.93	0.925	0.935
V9HW43	Epididymis secretory protein Li 102 OS=Homo sapiens GN=HEL-S-102 PE=2 SV=1	71	22.8	1.275	1.029	1.204	1.625	1.409
V9HW41	Epididymis secretory protein Li 71 OS=Homo sapiens GN=HEL-S-71 PE=2 SV=1	54	17.1	0.89	0.887	0.854	0.723	0.709
V9HW37	Epididymis secretory protein Li 69 OS=Homo sapiens GN=HEL-S-69 PE=1 SV=1	144	59.6	0.933	0.931	0.959	0.978	0.996
V9HW31	ATP synthase subunit beta OS=Homo sapiens GN=HEL-S-271 PE=1 SV=1	555	56.5	1.026	1.196	0.984	0.904	0.959
V9HW29	Kinesin-like protein OS=Homo sapiens GN=HEL-S-61 PE=2 SV=1	128	109.6	1.151	1.065	1.143	1.156	1.313
V9HW26	ATP synthase subunit alpha OS=Homo sapiens GN=HEL-S-123m PE=2 SV=1	491	59.7	0.986	1.138	0.957	0.884	0.956
V9HW22	Epididymis luminal protein 33 OS=Homo sapiens GN=HEL-S-72p PE=2 SV=1	711	70.9	1.018	0.968	0.965	0.999	1.005
V9HW12	Epididymis secretory sperm binding protein Li 2a OS=Homo sapiens GN=HEL-S-2a PE=2 SV=1	118	21.9	1.201	1.024	1.179	1.127	1.33
V9HW09	Epididymis secretory sperm binding protein Li 91n OS=Homo sapiens GN=HEL-S-91n PE=2 SV=1	21	39.6	0.799	0.819	0.825	0.917	0.806
V9HW05	Epididymis luminal protein 210 OS=Homo sapiens GN=HEL-210 PE=2 SV=1	104	10.8	0.896	0.822	1.036	1.55	1.496
V9HW04	Serine/threonine-protein phosphatase OS=Homo sapiens GN=HEL-S-80p PE=2 SV=1	48	37.2	1.007	0.949	1.054	1.163	1.134
V9HVY1	Epididymis secretory sperm binding protein Li 78p OS=Homo sapiens GN=HEL-S-78p PE=2 SV=1	82	55.9	1.356	1.078	1.28	2.152	1.683
V9GZ56	U6 snRNA-associated Sm-like protein LSm4 (Fragment) OS=Homo sapiens GN=LSM4 PE=1 SV=1	4	25.7	1.075	1.1	1.153	1.058	1.057
V9GZ17	Tubulin alpha-8 chain (Fragment) OS=Homo sapiens GN=TUBA8 PE=1 SV=1	296	31.1	0.639	0.845	0.854	0.686	0.328
V9GYM8	Rho guanine nucleotide exchange factor 2 OS=Homo sapiens GN=ARHGEF2 PE=1 SV=1	46	116	0.881	0.914	0.801	0.757	0.668
V9GYM3	Apolipoprotein A-II OS=Homo sapiens GN=APOA2 PE=1 SV=1	18	14.9	0.895	0.886	0.996	0.764	1.075
U6FSN9	Tyrosine-protein kinase receptor OS=Homo sapiens GN=Mprip-Ntrk1 fusion gene PE=2 SV=1	24	150.4	0.909	0.92	0.843	0.697	0.676
U4PSC4	Mediator complex subunit 4 (Fragment) OS=Homo sapiens GN=MED4 PE=2 SV=1	2	35.3	1.115	0.892	1.195	1.414	1.849
U3PXP0	Alpha globin chain (Fragment) OS=Homo sapiens GN=HBA2 PE=3 SV=1	99	5.7	0.723	0.737	0.714	1.047	0.915
U3KQP3	NADH dehydrogenase [ubiquinone] 1 alpha subcomplex subunit 13 (Fragment) OS=Homo sapiens GN=NDUFA13 PE=4 SV=2	11	8.7	0.781	1.077	0.907	0.931	0.91
U3KQL2	Acylphosphatase OS=Homo sapiens GN=ACYP2 PE=1 SV=1	19	19.6	0.925	0.973	0.981	1.183	1.218
U3KQK5	Uncharacterized protein OS=Homo sapiens PE=4 SV=1	39	17	0.896	1.042	0.896	0.938	0.941
U3KQK0	Histone H2B OS=Homo sapiens GN=HIST1H2BN PE=1 SV=1	123	18.8	1.044	1.063	1.101	1.151	1.06
U3KQB3	Casein kinase I isoform gamma-1 OS=Homo sapiens GN=CSNK1G1 PE=1 SV=1	8	54.4	0.762	0.917	0.932	0.948	0.904
T2DQ69	MAP3K3/DDX42 fusion protein 1 (Fragment) OS=Homo sapiens PE=2 SV=1	10	61	0.787	0.957	0.769	0.726	0.632
T1SGS4	Mutant microtubule-associated protein tau (Fragment) OS=Homo sapiens GN=MAPT PE=4 SV=1	2	2.9	0.608	0.867	0.555	0.483	0.381
S4R3N1	Protein HSPE1-MOB4 OS=Homo sapiens GN=HSPE1-MOB4 PE=3 SV=1	52	29.7	0.844	0.866	0.976	1.104	0.942
S4R3E2	DnaJ homolog subfamily C member 12 OS=Homo sapiens GN=DNAJC12 PE=1 SV=1	2	26.6	1.208	0.886	1.164	0.95	0.973
S4R347	Formin-binding protein 1-like OS=Homo sapiens GN=FNBP1L PE=1 SV=1	2	70.5
R4GN35	DENN domain-containing protein 4C OS=Homo sapiens GN=DENND4C PE=1 SV=1	2	217.7	1.046	1.244	1.031	1.027	0.914
R4GMX3	Protein COMMD3-BMI1 OS=Homo sapiens GN=COMMD3-BMI1 PE=4 SV=1	6	53.3	1.133	1.127	1.284	1.457	1.525
Q9Y6Y1	Calmodulin-binding transcription activator 1 OS=Homo sapiens GN=CAMTA1 PE=1 SV=4	1	183.6	1.156	1.502	1.204	1.206	1.075
Q9Y6X8	Zinc fingers and homeoboxes protein 2 OS=Homo sapiens GN=ZHX2 PE=1 SV=1	2	92.3
Q9Y6X5	Bis(5'-adenosyl)-triphosphatase ENPP4 OS=Homo sapiens GN=ENPP4 PE=1 SV=3	8	51.6	0.822	0.999	0.919	1.157	1.06
Q9Y6X4	Soluble lamin-associated protein of 75 kDa OS=Homo sapiens GN=FAM169A PE=1 SV=2	16	74.9	0.832	0.854	0.916	0.876	0.885
Q9Y6W5	Wiskott-Aldrich syndrome protein family member 2 OS=Homo sapiens GN=WASF2 PE=1 SV=3	15	54.3	1.123	1.087	1.088	1.397	1.453
Q9Y6V0-5	Isoform 5 of Protein piccolo OS=Homo sapiens GN=PCLO	177	560.4	0.899	0.889	0.912	0.818	0.698
Q9Y6U3	Adseverin OS=Homo sapiens GN=SCIN PE=1 SV=4	12	80.4	1.481	1.149	1.361	1.629	1.555
Q9Y6R7	IgGFc-binding protein OS=Homo sapiens GN=FCGBP PE=1 SV=3	19	571.6	1.317	1.241	1.715	1.58	2.09
Q9Y6R1	Electrogenic sodium bicarbonate cotransporter 1 OS=Homo sapiens GN=SLC4A4 PE=1 SV=1	91	121.4	0.977	1.042	0.983	0.96	0.995
Q9Y6R0	Numb-like protein OS=Homo sapiens GN=NUMBL PE=1 SV=1	27	64.9	0.937	0.847	0.89	0.705	0.681
Q9Y6N7-2	Isoform 2 of Roundabout homolog 1 OS=Homo sapiens GN=ROBO1	6	181.2	1.206	1.139	1.08	0.986	1.043
Q9Y6N6	Laminin subunit gamma-3 OS=Homo sapiens GN=LAMC3 PE=1 SV=3	2	171.1
Q9Y6M9	NADH dehydrogenase [ubiquinone] 1 beta subcomplex subunit 9 OS=Homo sapiens GN=NDUFB9 PE=1 SV=3	28	21.8	0.924	1.124	1.092	1.026	1.132
Q9Y6M7-7	Isoform 7 of Sodium bicarbonate cotransporter 3 OS=Homo sapiens GN=SLC4A7	14	140.7	0.899	0.981	0.769	0.808	0.849
Q9Y6M5	Zinc transporter 1 OS=Homo sapiens GN=SLC30A1 PE=1 SV=3	12	55.3	0.974	0.93	0.935	0.952	0.883
Q9Y6M4-2	Isoform 2 of Casein kinase I isoform gamma-3 OS=Homo sapiens GN=CSNK1G3	8	52.3	0.863	0.948	0.882	0.888	0.902
Q9Y6K9-2	Isoform 2 of NF-kappa-B essential modulator OS=Homo sapiens GN=IKBKG	5	55.8	1.178	1.317	1.153	1.175	1.012
Q9Y6K8	Adenylate kinase isoenzyme 5 OS=Homo sapiens GN=AK5 PE=1 SV=2	49	63.3	0.895	0.853	0.947	0.891	0.71
Q9Y6I3-1	Isoform 2 of Epsin-1 OS=Homo sapiens GN=EPN1	47	69	0.996	0.939	0.915	0.751	0.786
Q9Y6H1	Coiled-coil-helix-coiled-coil-helix domain-containing protein 2 OS=Homo sapiens GN=CHCHD2 PE=1 SV=1	5	15.5	1.007	0.901	0.904	1.09	0.902
Q9Y6G9	Cytoplasmic dynein 1 light intermediate chain 1 OS=Homo sapiens GN=DYNC1LI1 PE=1 SV=3	55	56.5	0.952	0.948	0.969	0.891	0.92
Q9Y6G5	COMM domain-containing protein 10 OS=Homo sapiens GN=COMMD10 PE=1 SV=1	8	23	1.031	1.091	1.008	1.082	1.059
Q9Y6F6-7	Isoform 7 of Protein MRVI1 OS=Homo sapiens GN=MRVI1	15	98.8	1.004	0.957	1.171	1.252	1.099
Q9Y6D5	Brefeldin A-inhibited guanine nucleotide-exchange protein 2 OS=Homo sapiens GN=ARFGEF2 PE=1 SV=3	27	201.9	0.843	0.914	0.893	0.897	0.72
Q9Y6C9	Mitochondrial carrier homolog 2 OS=Homo sapiens GN=MTCH2 PE=1 SV=1	37	33.3	0.96	1.005	1.099	1.441	1.184
Q9Y6A4	Cilia- and flagella-associated protein 20 OS=Homo sapiens GN=CFAP20 PE=1 SV=1	2	22.8	0.932	1.1	0.954	1.028	0.918
Q9Y6A2	Cholesterol 24-hydroxylase OS=Homo sapiens GN=CYP46A1 PE=1 SV=1	8	56.8	0.778	0.815	0.693	0.688	0.526
Q9Y698	Voltage-dependent calcium channel gamma-2 subunit OS=Homo sapiens GN=CACNG2 PE=1 SV=1	14	35.9	0.91	1.109	0.949	1.004	1.033
Q9Y679	Ancient ubiquitous protein 1 OS=Homo sapiens GN=AUP1 PE=1 SV=1	4	53	0.826	0.857	0.859	0.774	0.699
Q9Y678	Coatomer subunit gamma-1 OS=Homo sapiens GN=COPG1 PE=1 SV=1	22	97.7	1.032	0.927	0.866	0.842	0.811
Q9Y657	Spindlin-1 OS=Homo sapiens GN=SPIN1 PE=1 SV=3	4	29.6	0.992	1.04	0.898	0.791	0.811
Q9Y639-5	Isoform 5 of Neuroplastin OS=Homo sapiens GN=NPTN	141	43.9	1.034	1.122	1.101	1.018	0.964
Q9Y625	Glypican-6 OS=Homo sapiens GN=GPC6 PE=1 SV=1	4	62.7	1.428	1.352	1.294	1.002	1.131
Q9Y5Y5-2	Isoform 2 of Peroxisomal membrane protein PEX16 OS=Homo sapiens GN=PEX16	2	39.2	1.104	1.147	1.073	1.063	0.946
Q9Y5W9	Sorting nexin-11 OS=Homo sapiens GN=SNX11 PE=1 SV=2	2	30.4	0.864	0.979	0.857	0.81	0.857
Q9Y5U9	Immediate early response 3-interacting protein 1 OS=Homo sapiens GN=IER3IP1 PE=1 SV=1	2	9	0.823	0.948	0.757	0.75	0.879
Q9Y5S1	Transient receptor potential cation channel subfamily V member 2 OS=Homo sapiens GN=TRPV2 PE=1 SV=1	14	85.9	1.074	1.235	1.043	0.868	1.068
Q9Y5P4-3	Isoform 3 of Collagen type IV alpha-3-binding protein OS=Homo sapiens GN=COL4A3BP	6	83.7	0.743	0.834	0.755	0.827	0.613
Q9Y5M8	Signal recognition particle receptor subunit beta OS=Homo sapiens GN=SRPRB PE=1 SV=3	6	29.7	0.739	0.887	0.815	1.058	0.835
Q9Y5L4	Mitochondrial import inner membrane translocase subunit Tim13 OS=Homo sapiens GN=TIMM13 PE=1 SV=1	30	10.5	0.912	1.109	1.051	1.002	1.011
Q9Y5L3	Ectonucleoside triphosphate diphosphohydrolase 2 OS=Homo sapiens GN=ENTPD2 PE=1 SV=1	12	53.6	1.12	1.103	1.146	1.263	1.235
Q9Y5K6	CD2-associated protein OS=Homo sapiens GN=CD2AP PE=1 SV=1	4	71.4	0.889	0.921	0.967	1.173	1.263
Q9Y5K3	Choline-phosphate cytidylyltransferase B OS=Homo sapiens GN=PCYT1B PE=1 SV=1	10	41.9	0.916	0.948	0.952	0.893	0.852
Q9Y5F6	Protocadherin gamma-C5 OS=Homo sapiens GN=PCDHGC5 PE=2 SV=1	8	101.9	0.913	0.868	0.886	0.982	0.868
Q9Y5B9	FACT complex subunit SPT16 OS=Homo sapiens GN=SUPT16H PE=1 SV=1	2	119.8	1.129	1.193	1.235	0.918	1.134
Q9Y5A9	YTH domain-containing family protein 2 OS=Homo sapiens GN=YTHDF2 PE=1 SV=2	6	62.3	0.862	0.945	0.804	0.76	0.779
Q9Y587-2	Isoform 2 of AP-4 complex subunit sigma-1 OS=Homo sapiens GN=AP4S1	2	18.6
Q9Y584	Mitochondrial import inner membrane translocase subunit Tim22 OS=Homo sapiens GN=TIMM22 PE=1 SV=2	2	20	1.037	1.228	1.088	0.944	0.927
Q9Y570	Protein phosphatase methylesterase 1 OS=Homo sapiens GN=PPME1 PE=1 SV=3	24	42.3	0.906	0.83	0.938	0.803	0.79
Q9Y520-7	Isoform 7 of Protein PRRC2C OS=Homo sapiens GN=PRRC2C	20	316.9	0.972	1.032	1.006	0.872	0.99
Q9Y512	Sorting and assembly machinery component 50 homolog OS=Homo sapiens GN=SAMM50 PE=1 SV=3	36	51.9	0.918	1.016	1.105	1.199	1.108
Q9Y4X5	E3 ubiquitin-protein ligase ARIH1 OS=Homo sapiens GN=ARIH1 PE=1 SV=2	9	64.1	0.855	0.817	0.824	0.749	0.69
Q9Y4P8-4	Isoform 4 of WD repeat domain phosphoinositide-interacting protein 2 OS=Homo sapiens GN=WIPI2	13	47.5	0.976	0.919	0.967	0.855	0.866
Q9Y4P1	Cysteine protease ATG4B OS=Homo sapiens GN=ATG4B PE=1 SV=2	9	44.3	0.815	0.784	0.819	0.861	0.889
Q9Y4L1	Hypoxia up-regulated protein 1 OS=Homo sapiens GN=HYOU1 PE=1 SV=1	119	111.3	0.916	0.958	0.935	0.823	0.81
Q9Y4J8	Dystrobrevin alpha OS=Homo sapiens GN=DTNA PE=1 SV=2	37	83.8	1.204	1.065	1.212	1.142	1.109
Q9Y4G8	Rap guanine nucleotide exchange factor 2 OS=Homo sapiens GN=RAPGEF2 PE=1 SV=1	54	167.3	0.933	0.856	0.881	0.791	0.694
Q9Y4G6	Talin-2 OS=Homo sapiens GN=TLN2 PE=1 SV=4	229	271.4	0.857	0.873	0.884	0.819	0.731
Q9Y4F5	Centrosomal protein of 170 kDa protein B OS=Homo sapiens GN=CEP170B PE=1 SV=4	80	171.6	0.88	0.879	0.857	0.807	0.715
Q9Y4F1	FERM, RhoGEF and pleckstrin domain-containing protein 1 OS=Homo sapiens GN=FARP1 PE=1 SV=1	38	118.6	0.935	0.915	0.901	0.94	0.899
Q9Y4E8-3	Isoform 3 of Ubiquitin carboxyl-terminal hydrolase 15 OS=Homo sapiens GN=USP15	14	109.7	0.801	0.822	0.844	0.77	0.773
Q9Y4E6	WD repeat-containing protein 7 OS=Homo sapiens GN=WDR7 PE=1 SV=2	72	163.7	0.917	0.944	0.922	0.844	0.765
Q9Y4D2	Sn1-specific diacylglycerol lipase alpha OS=Homo sapiens GN=DAGLA PE=1 SV=3	10	114.9	0.763	0.788	0.767	0.932	1.005
Q9Y4D1	Disheveled-associated activator of morphogenesis 1 OS=Homo sapiens GN=DAAM1 PE=1 SV=2	34	123.4	1.022	1.059	1.021	1.086	0.953
Q9Y4C2	TRPM8 channel-associated factor 1 OS=Homo sapiens GN=TCAF1 PE=1 SV=3	6	102.1	0.845	0.876	0.842	0.843	0.686
Q9Y4B6	Protein VPRBP OS=Homo sapiens GN=VPRBP PE=1 SV=3	6	168.9	1.029	0.959	1.002	0.902	0.858
Q9Y490	Talin-1 OS=Homo sapiens GN=TLN1 PE=1 SV=3	206	269.6	1.087	1.055	1.176	1.235	1.233
Q9Y484-2	Isoform 2 of WD repeat domain phosphoinositide-interacting protein 4 OS=Homo sapiens GN=WDR45	2	41	0.718	0.829	0.762	0.77	0.677
Q9Y426	C2 domain-containing protein 2 OS=Homo sapiens GN=C2CD2 PE=1 SV=2	10	75.5	1.064	1.054	1.028	0.98	0.962
Q9Y3Z3	Deoxynucleoside triphosphate triphosphohydrolase SAMHD1 OS=Homo sapiens GN=SAMHD1 PE=1 SV=2	17	72.2	1.13	1.064	1.024	1.136	1.111
Q9Y3Y2-3	Isoform 2 of Chromatin target of PRMT1 protein OS=Homo sapiens GN=CHTOP	6	26.5	1.064	1.026	1.024	0.826	1.131
Q9Y3X0	Coiled-coil domain-containing protein 9 OS=Homo sapiens GN=CCDC9 PE=1 SV=1	9	59.7	0.793	0.898	0.761	0.75	0.807
Q9Y3U8	60S ribosomal protein L36 OS=Homo sapiens GN=RPL36 PE=1 SV=3	14	12.2	0.876	1.03	0.861	0.808	0.863
Q9Y3S1	Serine/threonine-protein kinase WNK2 OS=Homo sapiens GN=WNK2 PE=1 SV=4	46	242.5	0.913	0.949	0.942	0.863	0.861
Q9Y3Q8	TSC22 domain family protein 4 OS=Homo sapiens GN=TSC22D4 PE=1 SV=2	15	41	1.046	1.049	1.063	1.02	1.062
Q9Y3P9	Rab GTPase-activating protein 1 OS=Homo sapiens GN=RABGAP1 PE=1 SV=3	29	121.7	1.086	1.066	1.105	1.266	1.169
Q9Y3L5	Ras-related protein Rap-2c OS=Homo sapiens GN=RAP2C PE=1 SV=1	40	20.7	0.82	0.866	0.755	0.687	0.697
Q9Y3I0	tRNA-splicing ligase RtcB homolog OS=Homo sapiens GN=RTCB PE=1 SV=1	54	55.2	0.923	0.932	0.951	0.899	0.918
Q9Y3F4-2	Isoform 2 of Serine-threonine kinase receptor-associated protein OS=Homo sapiens GN=STRAP	39	39.8	0.931	0.932	0.952	0.869	0.857
Q9Y3E7	Charged multivesicular body protein 3 OS=Homo sapiens GN=CHMP3 PE=1 SV=3	8	25.1	0.801	0.858	0.779	0.804	0.737
Q9Y3E2	BolA-like protein 1 OS=Homo sapiens GN=BOLA1 PE=1 SV=1	2	14.3	1.266	1.24	1.254	1.118	1.08
Q9Y3D9	28S ribosomal protein S23, mitochondrial OS=Homo sapiens GN=MRPS23 PE=1 SV=2	2	21.8	0.568	0.872	0.662	0.661	0.53
Q9Y3D8	Adenylate kinase isoenzyme 6 OS=Homo sapiens GN=AK6 PE=1 SV=1	2	20	1.17	1.237	1.211	0.996	1.07
Q9Y3D6	Mitochondrial fission 1 protein OS=Homo sapiens GN=FIS1 PE=1 SV=2	27	16.9	1.028	1.233	0.967	0.997	1.067
Q9Y3D3	28S ribosomal protein S16, mitochondrial OS=Homo sapiens GN=MRPS16 PE=1 SV=1	6	15.3	0.712	0.717	0.95	0.783	0.663
Q9Y3D2	Methionine-R-sulfoxide reductase B2, mitochondrial OS=Homo sapiens GN=MSRB2 PE=1 SV=2	4	19.5	1.037	1.019	1.088	1.07	1.013
Q9Y3D0	Mitotic spindle-associated MMXD complex subunit MIP18 OS=Homo sapiens GN=FAM96B PE=1 SV=1	10	17.7	1.074	1.052	1.077	1.059	0.979
Q9Y3C8	Ubiquitin-fold modifier-conjugating enzyme 1 OS=Homo sapiens GN=UFC1 PE=1 SV=3	8	19.4	0.782	0.818	0.88	0.912	1.003
Q9Y3C6	Peptidyl-prolyl cis-trans isomerase-like 1 OS=Homo sapiens GN=PPIL1 PE=1 SV=1	13	18.2	0.928	0.915	1.003	0.949	0.885
Q9Y3C5	RING finger protein 11 OS=Homo sapiens GN=RNF11 PE=1 SV=1	2	17.4	0.817	0.876	0.711	0.942	0.669
Q9Y3C0	WASH complex subunit CCDC53 OS=Homo sapiens GN=CCDC53 PE=1 SV=1	3	21.2	1.574	1.392	1.667	1.134	1.515
Q9Y3B4	Splicing factor 3B subunit 6 OS=Homo sapiens GN=SF3B6 PE=1 SV=1	6	14.6	0.839	0.92	0.887	1.037	0.979
Q9Y3A6	Transmembrane emp24 domain-containing protein 5 OS=Homo sapiens GN=TMED5 PE=1 SV=1	4	26	0.726	1.03	0.731	1.052	0.835
Q9Y394	Dehydrogenase/reductase SDR family member 7 OS=Homo sapiens GN=DHRS7 PE=1 SV=1	23	38.3	1.029	1.145	1.111	1.229	1.248
Q9Y376	Calcium-binding protein 39 OS=Homo sapiens GN=CAB39 PE=1 SV=1	38	39.8	0.735	0.849	0.808	0.878	0.938
Q9Y375	Complex I intermediate-associated protein 30, mitochondrial OS=Homo sapiens GN=NDUFAF1 PE=1 SV=2	9	37.7	0.874	1.015	0.845	0.818	0.799
Q9Y371-2	Isoform 2 of Endophilin-B1 OS=Homo sapiens GN=SH3GLB1	29	43.2	1.097	0.967	1.029	1.092	1.235
Q9Y333	U6 snRNA-associated Sm-like protein LSm2 OS=Homo sapiens GN=LSM2 PE=1 SV=1	2	10.8	0.701	0.815	0.873	1.017	0.924
Q9Y316-3	Isoform 3 of Protein MEMO1 OS=Homo sapiens GN=MEMO1	2	34.3	1.047	1.087	1.064	1.058	1.167
Q9Y315	Deoxyribose-phosphate aldolase OS=Homo sapiens GN=DERA PE=1 SV=2	2	35.2	0.353	0.948	0.638	0.689	0.421
Q9Y305	Acyl-coenzyme A thioesterase 9, mitochondrial OS=Homo sapiens GN=ACOT9 PE=1 SV=2	43	49.9	1.021	1.135	1.056	0.942	0.928
Q9Y2Z9	Ubiquinone biosynthesis monooxygenase COQ6, mitochondrial OS=Homo sapiens GN=COQ6 PE=1 SV=2	6	50.8	2.478	1.227	1.233	1.042	1.226
Q9Y2Z4	Tyrosine--tRNA ligase, mitochondrial OS=Homo sapiens GN=YARS2 PE=1 SV=2	6	53.2	0.836	0.986	0.854	0.754	0.757
Q9Y2Z0	Protein SGT1 homolog OS=Homo sapiens GN=SUGT1 PE=1 SV=3	49	41	1.023	0.957	1.008	0.919	0.981
Q9Y2W2	WW domain-binding protein 11 OS=Homo sapiens GN=WBP11 PE=1 SV=1	4	70	0.968	1.096	0.932	0.877	0.991
Q9Y2W1	Thyroid hormone receptor-associated protein 3 OS=Homo sapiens GN=THRAP3 PE=1 SV=2	26	108.6	0.815	0.908	0.812	0.722	0.664
Q9Y2V2	Calcium-regulated heat-stable protein 1 OS=Homo sapiens GN=CARHSP1 PE=1 SV=2	7	15.9	1.04	0.912	1.074	1.072	1.075
Q9Y2U8	Inner nuclear membrane protein Man1 OS=Homo sapiens GN=LEMD3 PE=1 SV=2	2	99.9
Q9Y2T4	Serine/threonine-protein phosphatase 2A 55 kDa regulatory subunit B gamma isoform OS=Homo sapiens GN=PPP2R2C PE=1 SV=4	8	51.5	0.895	0.946	0.909	0.943	0.791
Q9Y2S7	Polymerase delta-interacting protein 2 OS=Homo sapiens GN=POLDIP2 PE=1 SV=1	4	42	0.56	0.728	0.671	0.547	0.534
Q9Y2S6	Translation machinery-associated protein 7 OS=Homo sapiens GN=TMA7 PE=1 SV=1	4	7.1	1.069	1.088	1.117	1.166	1.297
Q9Y2S2	Lambda-crystallin homolog OS=Homo sapiens GN=CRYL1 PE=1 SV=3	29	35.4	0.892	0.949	1.001	1.285	1.174
Q9Y2R0	Cytochrome c oxidase assembly factor 3 homolog, mitochondrial OS=Homo sapiens GN=COA3 PE=1 SV=1	11	11.7	1.012	1.371	1.107	0.97	0.996
Q9Y2Q5	Ragulator complex protein LAMTOR2 OS=Homo sapiens GN=LAMTOR2 PE=1 SV=1	4	13.5	0.487	0.51	0.547	0.685	0.626
Q9Y2Q3-2	Isoform 2 of Glutathione S-transferase kappa 1 OS=Homo sapiens GN=GSTK1	14	31.5	0.871	0.957	0.933	1.047	0.852
Q9Y2Q0	Phospholipid-transporting ATPase IA OS=Homo sapiens GN=ATP8A1 PE=1 SV=1	101	131.3	0.945	0.951	1.017	0.996	0.865
Q9Y2L9-3	Isoform 3 of Leucine-rich repeat and calponin homology domain-containing protein 1 OS=Homo sapiens GN=LRCH1	6	84.6	0.951	1.12	1.203	0.911	0.889
Q9Y2J8	Protein-arginine deiminase type-2 OS=Homo sapiens GN=PADI2 PE=1 SV=2	121	75.5	1.15	1.162	1.184	1.786	1.719
Q9Y2J2	Band 4.1-like protein 3 OS=Homo sapiens GN=EPB41L3 PE=1 SV=2	345	120.6	1.036	1.015	0.999	0.834	0.855
Q9Y2I8-2	Isoform 2 of WD repeat-containing protein 37 OS=Homo sapiens GN=WDR37	18	54.8	0.903	0.913	0.892	0.853	0.694
Q9Y2I7	1-phosphatidylinositol 3-phosphate 5-kinase OS=Homo sapiens GN=PIKFYVE PE=1 SV=3	3	237	1.35	1.319	1.274	1.052	1.138
Q9Y2I2	Netrin-G1 OS=Homo sapiens GN=NTNG1 PE=1 SV=3	4	60.5	1.18	1.704	1.328	1.29	1.006
Q9Y2H9	Microtubule-associated serine/threonine-protein kinase 1 OS=Homo sapiens GN=MAST1 PE=1 SV=2	12	170.6	0.996	0.98	0.929	0.912	0.796
Q9Y2H2	Phosphatidylinositide phosphatase SAC2 OS=Homo sapiens GN=INPP5F PE=1 SV=3	2	128.3	0.983	1.037	0.972	0.879	0.932
Q9Y2H1	Serine/threonine-protein kinase 38-like OS=Homo sapiens GN=STK38L PE=1 SV=3	12	54	0.971	0.928	1.012	0.861	0.795
Q9Y2H0-1	Isoform 2 of Disks large-associated protein 4 OS=Homo sapiens GN=DLGAP4	27	107.5	1.031	1.087	1.354	1.637	1.492
Q9Y2G0	Protein EFR3 homolog B OS=Homo sapiens GN=EFR3B PE=1 SV=2	26	92.4	0.87	0.93	0.839	0.786	0.666
Q9Y2E4	Disco-interacting protein 2 homolog C OS=Homo sapiens GN=DIP2C PE=1 SV=2	18	170.7	0.89	1.337	0.916	0.978	0.86
Q9Y2B5-2	Isoform 2 of VPS9 domain-containing protein 1 OS=Homo sapiens GN=VPS9D1	6	72.9	1.199	1.253	1.275	1.305	1.353
Q9Y2B0	Protein canopy homolog 2 OS=Homo sapiens GN=CNPY2 PE=1 SV=1	20	20.6	1.376	1.202	1.285	1.014	1.29
Q9Y2A7-2	Isoform 2 of Nck-associated protein 1 OS=Homo sapiens GN=NCKAP1	113	129.4	0.884	0.879	0.937	0.957	0.868
Q9Y296	Trafficking protein particle complex subunit 4 OS=Homo sapiens GN=TRAPPC4 PE=1 SV=1	6	24.3	1.059	1.105	1.093	1.077	1.019
Q9Y295	Developmentally-regulated GTP-binding protein 1 OS=Homo sapiens GN=DRG1 PE=1 SV=1	4	40.5	0.789	0.648	0.736	0.968	0.835
Q9Y277-2	Isoform 2 of Voltage-dependent anion-selective channel protein 3 OS=Homo sapiens GN=VDAC3	95	30.8	0.811	0.973	0.853	0.866	0.819
Q9Y266	Nuclear migration protein nudC OS=Homo sapiens GN=NUDC PE=1 SV=1	54	38.2	1.018	1.012	1.046	0.903	1
Q9Y263	Phospholipase A-2-activating protein OS=Homo sapiens GN=PLAA PE=1 SV=2	29	87.1	0.927	0.998	0.872	0.83	0.793
Q9Y259	Choline/ethanolamine kinase OS=Homo sapiens GN=CHKB PE=1 SV=3	4	45.2	0.962	0.935	1.063	1.049	0.958
Q9Y250	Leucine zipper putative tumor suppressor 1 OS=Homo sapiens GN=LZTS1 PE=1 SV=3	3	66.6	0.844	0.873	0.886	0.814	0.539
Q9Y243	RAC-gamma serine/threonine-protein kinase OS=Homo sapiens GN=AKT3 PE=1 SV=1	11	55.7	1.045	0.958	0.949	0.835	0.852
Q9Y237-2	Isoform 2 of Peptidyl-prolyl cis-trans isomerase NIMA-interacting 4 OS=Homo sapiens GN=PIN4	5	16.6	2.865	1.519	2.153	1.235	1.881
Q9Y230	RuvB-like 2 OS=Homo sapiens GN=RUVBL2 PE=1 SV=3	35	51.1	0.948	1.034	1.003	1.135	1.125
Q9Y219	Protein jagged-2 OS=Homo sapiens GN=JAG2 PE=1 SV=3	2	133.3	1.058	1.068	1.568	1.394	1.116
Q9Y217	Myotubularin-related protein 6 OS=Homo sapiens GN=MTMR6 PE=1 SV=3	12	71.9	0.912	0.897	0.868	1.003	1.314
Q9UQN3	Charged multivesicular body protein 2b OS=Homo sapiens GN=CHMP2B PE=1 SV=1	20	23.9	1.05	1.037	1.001	0.923	1.077
Q9UQL6-3	Isoform 3 of Histone deacetylase 5 OS=Homo sapiens GN=HDAC5	10	122	0.839	0.961	0.89	0.818	0.782
Q9UQD0-3	Isoform 3 of Sodium channel protein type 8 subunit alpha OS=Homo sapiens GN=SCN8A	27	226.3	0.972	1.067	1.013	1.017	1.053
Q9UQC2	GRB2-associated-binding protein 2 OS=Homo sapiens GN=GAB2 PE=1 SV=1	2	74.4	0.787	0.707	0.696	0.459	0.507
Q9UQB8	Brain-specific angiogenesis inhibitor 1-associated protein 2 OS=Homo sapiens GN=BAIAP2 PE=1 SV=1	105	60.8	0.921	0.789	0.823	0.701	0.588
Q9UQB3	Catenin delta-2 OS=Homo sapiens GN=CTNND2 PE=1 SV=3	112	132.6	0.941	0.928	1.067	1.134	1.057
Q9UQ90	Paraplegin OS=Homo sapiens GN=SPG7 PE=1 SV=2	12	88.2	0.833	0.98	0.858	0.809	0.832
Q9UQ49-2	Isoform 2 of Sialidase-3 OS=Homo sapiens GN=NEU3	4	51.6	1.7	1.029	0.902	0.855	1.013
Q9UQ26	Regulating synaptic membrane exocytosis protein 2 OS=Homo sapiens GN=RIMS2 PE=1 SV=2	19	160.3	0.897	0.914	0.925	0.833	0.796
Q9UQ16-4	Isoform 4 of Dynamin-3 OS=Homo sapiens GN=DNM3	154	98.1	0.863	0.917	0.869	0.823	0.764
Q9UQ13	Leucine-rich repeat protein SHOC-2 OS=Homo sapiens GN=SHOC2 PE=1 SV=2	8	64.8	0.895	0.889	0.834	0.891	0.799
Q9UQ03	Coronin-2B OS=Homo sapiens GN=CORO2B PE=1 SV=4	55	54.9	0.83	0.948	0.899	0.946	0.905
Q9UPY8-2	Isoform 2 of Microtubule-associated protein RP/EB family member 3 OS=Homo sapiens GN=MAPRE3	44	30.4	0.712	0.882	0.85	0.969	0.865
Q9UPY8	Microtubule-associated protein RP/EB family member 3 OS=Homo sapiens GN=MAPRE3 PE=1 SV=1	46	32	0.801	0.76	0.785	0.682	0.614
Q9UPY6-2	Isoform 2 of Wiskott-Aldrich syndrome protein family member 3 OS=Homo sapiens GN=WASF3	17	55	0.838	0.675	0.885	1.045	0.917
Q9UPY5	Cystine/glutamate transporter OS=Homo sapiens GN=SLC7A11 PE=1 SV=1	1	55.4	1.035	0.865	0.894	0.924	0.718
Q9UPX8-3	Isoform 3 of SH3 and multiple ankyrin repeat domains protein 2 OS=Homo sapiens GN=SHANK2	13	201.1	0.884	0.843	0.848	0.718	0.597
Q9UPX0-2	Isoform 2 of Protein turtle homolog B OS=Homo sapiens GN=IGSF9B	4	156.8	1.105	1.449	1.168	1.295	1.067
Q9UPV9	Trafficking kinesin-binding protein 1 OS=Homo sapiens GN=TRAK1 PE=1 SV=1	2	106	0.32	0.555	0.332	0.331	0.396
Q9UPV7	PHD finger protein 24 OS=Homo sapiens GN=PHF24 PE=1 SV=2	67	45.2	0.891	0.803	0.83	0.709	0.567
Q9UPU7	TBC1 domain family member 2B OS=Homo sapiens GN=TBC1D2B PE=1 SV=2	2	109.8	0.911	0.351	0.359	0.987	0.706
Q9UPT8	Zinc finger CCCH domain-containing protein 4 OS=Homo sapiens GN=ZC3H4 PE=1 SV=3	7	140.2	0.513	0.805	0.701	0.478	0.01
Q9UPT5	Exocyst complex component 7 OS=Homo sapiens GN=EXOC7 PE=1 SV=3	34	83.3	0.966	0.95	0.899	0.831	0.804
Q9UPR5	Sodium/calcium exchanger 2 OS=Homo sapiens GN=SLC8A2 PE=2 SV=2	95	100.3	0.976	0.952	0.903	0.855	0.744
Q9UPR0	Inactive phospholipase C-like protein 2 OS=Homo sapiens GN=PLCL2 PE=1 SV=2	14	125.8	0.878	0.89	0.849	0.672	0.604
Q9UPQ9	Trinucleotide repeat-containing gene 6B protein OS=Homo sapiens GN=TNRC6B PE=1 SV=4	10	193.9	0.996	1.13	0.998	0.996	1.069
Q9UPQ0	LIM and calponin homology domains-containing protein 1 OS=Homo sapiens GN=LIMCH1 PE=1 SV=4	69	121.8	0.969	0.956	0.903	0.887	0.92
Q9UPP5-2	Isoform 2 of Uncharacterized protein KIAA1107 OS=Homo sapiens GN=KIAA1107	89	138.5	1.05	1.061	0.955	0.775	0.913
Q9UPP2	IQ motif and SEC7 domain-containing protein 3 OS=Homo sapiens GN=IQSEC3 PE=2 SV=3	8	127.5	0.959	0.959	0.991	0.93	0.74
Q9UPN7	Serine/threonine-protein phosphatase 6 regulatory subunit 1 OS=Homo sapiens GN=PPP6R1 PE=1 SV=5	4	96.7	1.25	1.097	1.243	1.019	1.044
Q9UPA5	Protein bassoon OS=Homo sapiens GN=BSN PE=1 SV=4	253	416.2	0.963	0.917	0.939	0.855	0.739
Q9UP83-2	Isoform 2 of Conserved oligomeric Golgi complex subunit 5 OS=Homo sapiens GN=COG5	2	94.8	0.972	0.893	0.935	0.944	0.834
Q9UP65-3	Isoform 3 of Cytosolic phospholipase A2 gamma OS=Homo sapiens GN=PLA2G4C	2	62.4	1.035	1.158	1.15	1.004	1.136
Q9UNZ5	Leydig cell tumor 10 kDa protein homolog OS=Homo sapiens GN=C19orf53 PE=1 SV=1	2	10.6	1.721	1.606	1.308	1.408	1.545
Q9UNZ2-4	Isoform 2 of NSFL1 cofactor p47 OS=Homo sapiens GN=NSFL1C	52	37.3	2.696	1.64	2.115	1.03	1.756
Q9UNW9	RNA-binding protein Nova-2 OS=Homo sapiens GN=NOVA2 PE=1 SV=1	18	49	1.007	1.024	0.997	0.864	0.829
Q9UNS2	COP9 signalosome complex subunit 3 OS=Homo sapiens GN=COPS3 PE=1 SV=3	48	47.8	0.872	0.916	0.928	0.873	0.844
Q9UNP9-3	Isoform 3 of Peptidyl-prolyl cis-trans isomerase E OS=Homo sapiens GN=PPIE	2	35	0.797	0.893	0.777	0.88	0.862
Q9UNL2-2	Isoform 2 of Translocon-associated protein subunit gamma OS=Homo sapiens GN=SSR3	2	22.6	1.096	1.65	1.103	1.179	1.138
Q9UNK0	Syntaxin-8 OS=Homo sapiens GN=STX8 PE=1 SV=2	12	26.9	1.049	1.089	1.124	1.083	1.035
Q9UNH6-3	Isoform 3 of Sorting nexin-7 OS=Homo sapiens GN=SNX7	4	51.6	0.869	0.78	0.834	0.882	0.652
Q9UNF0-2	Isoform 2 of Protein kinase C and casein kinase substrate in neurons protein 2 OS=Homo sapiens GN=PACSIN2	36	51.3	0.935	0.983	1.031	1.099	1.05
Q9UNE7	E3 ubiquitin-protein ligase CHIP OS=Homo sapiens GN=STUB1 PE=1 SV=2	36	34.8	0.978	0.943	1.072	0.961	0.858
Q9UNA1	Rho GTPase-activating protein 26 OS=Homo sapiens GN=ARHGAP26 PE=1 SV=1	25	92.2	0.838	0.922	0.893	0.82	0.728
Q9UN37	Vacuolar protein sorting-associated protein 4A OS=Homo sapiens GN=VPS4A PE=1 SV=1	26	48.9	1.025	0.979	0.982	0.97	0.91
Q9UN36	Protein NDRG2 OS=Homo sapiens GN=NDRG2 PE=1 SV=2	106	40.8	0.792	0.928	0.832	0.983	0.889
Q9UMZ2-7	Isoform 6 of Synergin gamma OS=Homo sapiens GN=SYNRG	10	135.4	1.017	0.939	1.065	0.778	0.832
Q9UMZ1	Prothymosin a14 OS=Homo sapiens PE=2 SV=1	34	11.1	1.064	1.273	1.258	1.552	1.808
Q9UMX5	Neudesin OS=Homo sapiens GN=NENF PE=1 SV=1	24	18.8	1.135	1.135	1.085	1.246	1.235
Q9UMS4	Pre-mRNA-processing factor 19 OS=Homo sapiens GN=PRPF19 PE=1 SV=1	16	55.1	0.779	0.895	0.767	0.739	0.747
Q9UMS0	NFU1 iron-sulfur cluster scaffold homolog, mitochondrial OS=Homo sapiens GN=NFU1 PE=1 SV=2	8	28.4	0.715	0.858	0.82	0.708	0.701
Q9UM85	Beta-globin protein (Fragment) OS=Homo sapiens GN=beta-globin PE=4 SV=1	12	2.1	1.254	1.182	1.129	1.051	1.321
Q9UM19	Hippocalcin-like protein 4 OS=Homo sapiens GN=HPCAL4 PE=1 SV=3	135	22.2	0.976	0.923	1.035	1.155	0.929
Q9UM13	Anaphase-promoting complex subunit 10 OS=Homo sapiens GN=ANAPC10 PE=1 SV=1	2	21.2
Q9ULX7	Carbonic anhydrase 14 OS=Homo sapiens GN=CA14 PE=1 SV=1	8	37.6	1.182	1.322	0.97	1.319	1.492
Q9ULX6	A-kinase anchor protein 8-like OS=Homo sapiens GN=AKAP8L PE=1 SV=3	4	71.6	1.422	1.065	0.931	0.717	0.987
Q9ULW5	Ras-related protein Rab-26 OS=Homo sapiens GN=RAB26 PE=1 SV=3	2	27.9	0.971	0.966	0.933	0.99	0.89
Q9ULV4-3	Isoform 3 of Coronin-1C OS=Homo sapiens GN=CORO1C	43	58.9	0.9	0.87	0.947	0.975	0.941
Q9ULU8-4	Isoform 4 of Calcium-dependent secretion activator 1 OS=Homo sapiens GN=CADPS	128	153.4	0.827	0.843	0.894	0.842	0.717
Q9ULU4-19	Isoform 19 of Protein kinase C-binding protein 1 OS=Homo sapiens GN=ZMYND8	3	137.9	100
Q9ULS5	Transmembrane and coiled-coil domains protein 3 OS=Homo sapiens GN=TMCC3 PE=2 SV=3	4	53.8	2.419	1.909	2.215	1.371	2.785
Q9ULR3	Protein phosphatase 1H OS=Homo sapiens GN=PPM1H PE=1 SV=2	49	56.4	1.012	1.046	1.013	0.916	0.906
Q9ULP9	TBC1 domain family member 24 OS=Homo sapiens GN=TBC1D24 PE=1 SV=2	21	62.9	0.86	0.892	0.835	0.71	0.652
Q9ULP0-7	Isoform 7 of Protein NDRG4 OS=Homo sapiens GN=NDRG4	30	40	0.898	1.083	0.993	0.966	0.859
Q9ULN7-5	Isoform 2 of PNMA-like protein 2 OS=Homo sapiens GN=PNMAL2	16	68.6	0.943	0.889	0.95	0.866	0.853
Q9ULL8	Protein Shroom4 OS=Homo sapiens GN=SHROOM4 PE=1 SV=3	2	164.8	1.651	1.292	1.069	1.457	1.541
Q9ULL4-2	Isoform 2 of Plexin-B3 OS=Homo sapiens GN=PLXNB3	4	209.2	0.898	0.96	0.961	0.99	0.957
Q9ULL1	Pleckstrin homology domain-containing family G member 1 OS=Homo sapiens GN=PLEKHG1 PE=1 SV=2	5	155.3	0.942	0.793	0.911	0.889	0.816
Q9ULJ8-3	Isoform 3 of Neurabin-1 OS=Homo sapiens GN=PPP1R9A	25	154	0.699	0.89	0.769	0.682	0.617
Q9ULH7	MKL/myocardin-like protein 2 OS=Homo sapiens GN=MKL2 PE=1 SV=3	33	118.1	1.081	0.888	0.987	0.929	0.752
Q9ULH1-2	Isoform 1 of Arf-GAP with SH3 domain, ANK repeat and PH domain-containing protein 1 OS=Homo sapiens GN=ASAP1	21	125.8	0.9	0.919	0.849	0.751	0.769
Q9ULH0	Kinase D-interacting substrate of 220 kDa OS=Homo sapiens GN=KIDINS220 PE=1 SV=3	8	196.4	1.241	0.997	1.219	1.01	0.816
Q9ULF5	Zinc transporter ZIP10 OS=Homo sapiens GN=SLC39A10 PE=1 SV=2	10	94.1	1.025	1.102	0.978	0.819	0.762
Q9ULD0	2-oxoglutarate dehydrogenase-like, mitochondrial OS=Homo sapiens GN=OGDHL PE=1 SV=3	124	114.4	0.858	0.997	0.858	0.735	0.758
Q9ULC4-3	Isoform 3 of Malignant T-cell-amplified sequence 1 OS=Homo sapiens GN=MCTS1	10	20.5	0.856	0.879	1.068	1.192	1.044
Q9ULB4	Cadherin-9 OS=Homo sapiens GN=CDH9 PE=2 SV=2	8	88.6	1.044	1.186	1.022	1.005	0.915
Q9ULB1-3	Isoform 3a of Neurexin-1 OS=Homo sapiens GN=NRXN1	85	169.8	0.965	1.04	0.991	0.969	0.811
Q9UL82	Myosin-reactive immunoglobulin light chain variable region (Fragment) OS=Homo sapiens PE=2 SV=1	2	11.4	4.074	1.368	2.858	2.05	2.702
Q9UL63	Muskelin OS=Homo sapiens GN=MKLN1 PE=1 SV=2	2	84.7	0.974	1.018	0.988	0.935	0.938
Q9UL51	Potassium/sodium hyperpolarization-activated cyclic nucleotide-gated channel 2 OS=Homo sapiens GN=HCN2 PE=1 SV=3	33	96.9	0.994	1.256	1.038	0.933	1.224
Q9UL40-2	Isoform 2 of Zinc finger protein 346 OS=Homo sapiens GN=ZNF346	2	35.7
Q9UL26	Ras-related protein Rab-22A OS=Homo sapiens GN=RAB22A PE=1 SV=2	14	21.8	1.055	0.998	0.973	0.904	0.882
Q9UL18	Protein argonaute-1 OS=Homo sapiens GN=AGO1 PE=1 SV=3	10	97.2	0.967	1.011	0.977	1.047	1.003
Q9UL15-2	Isoform 2 of BAG family molecular chaperone regulator 5 OS=Homo sapiens GN=BAG5	24	56	1.005	1.037	1.053	0.996	1.034
Q9UKZ4-2	Isoform 2 of Teneurin-1 OS=Homo sapiens GN=TENM1	4	305.8	0.971	1.375	1.227	1.296	0.972
Q9UKZ1	CCR4-NOT transcription complex subunit 11 OS=Homo sapiens GN=CNOT11 PE=1 SV=1	4	55.2	0.918	1.069	1.008	0.899	0.812
Q9UKX7	Nuclear pore complex protein Nup50 OS=Homo sapiens GN=NUP50 PE=1 SV=2	2	50.1	0.898	1.01	0.813	0.679	0.743
Q9UKV8	Protein argonaute-2 OS=Homo sapiens GN=AGO2 PE=1 SV=3	8	97.1	0.856	1.188	1.11	1.016	0.919
Q9UKV3	Apoptotic chromatin condensation inducer in the nucleus OS=Homo sapiens GN=ACIN1 PE=1 SV=2	30	151.8	0.986	1.048	1.044	0.95	0.936
Q9UKU7	Isobutyryl-CoA dehydrogenase, mitochondrial OS=Homo sapiens GN=ACAD8 PE=1 SV=1	19	45	1.013	1.089	1.099	1.1	1.092
Q9UKU6	Thyrotropin-releasing hormone-degrading ectoenzyme OS=Homo sapiens GN=TRHDE PE=2 SV=1	5	116.9
Q9UKU0-1	Isoform 1 of Long-chain-fatty-acid--CoA ligase 6 OS=Homo sapiens GN=ACSL6	45	80.6	0.944	1.063	0.96	0.864	0.942
Q9UKK3	Poly [ADP-ribose] polymerase 4 OS=Homo sapiens GN=PARP4 PE=1 SV=3	11	192.5	1.27	1.204	1.105	1.051	1.376
Q9UKJ3	G patch domain-containing protein 8 OS=Homo sapiens GN=GPATCH8 PE=1 SV=2	1	164.1	1.083	0.629	0.841	1.19	0.821
Q9UKI8-2	Isoform 2 of Serine/threonine-protein kinase tousled-like 1 OS=Homo sapiens GN=TLK1	2	89
Q9UKG1	DCC-interacting protein 13-alpha OS=Homo sapiens GN=APPL1 PE=1 SV=1	36	79.6	1.002	0.972	0.985	0.972	1
Q9UKF7	Cytoplasmic phosphatidylinositol transfer protein 1 OS=Homo sapiens GN=PITPNC1 PE=1 SV=3	10	38.4	1.066	1.011	1.046	1.046	1.034
Q9UKE5	TRAF2 and NCK-interacting protein kinase OS=Homo sapiens GN=TNIK PE=1 SV=1	23	154.8	1.162	1.058	1.02	0.854	0.927
Q9UKA4	A-kinase anchor protein 11 OS=Homo sapiens GN=AKAP11 PE=1 SV=1	2	210.4	1.151	1.158	0.9	0.862	0.971
Q9UK99	F-box only protein 3 OS=Homo sapiens GN=FBXO3 PE=1 SV=3	10	54.5	0.949	0.858	0.983	0.865	0.84
Q9UK61	Protein TASOR OS=Homo sapiens GN=FAM208A PE=1 SV=3	2	188.9	0.714	0.802	0.751	0.598	0.603
Q9UK54	Hemoglobin beta subunit variant (Fragment) OS=Homo sapiens GN=HBB PE=2 SV=1	618	14	0.818	0.941	1.176	0.943	1.641
Q9UK51	Neurofilament-3 (150 kD medium) (Fragment) OS=Homo sapiens GN=NEF3 PE=2 SV=1	137	28.4	0.77	1.028	0.851	0.702	1.419
Q9UK45	U6 snRNA-associated Sm-like protein LSm7 OS=Homo sapiens GN=LSM7 PE=1 SV=1	8	11.6	0.998	0.949	0.998	1.107	1.022
Q9UK41-2	Isoform 2 of Vacuolar protein sorting-associated protein 28 homolog OS=Homo sapiens GN=VPS28	9	26.4	1.086	0.977	0.97	1.072	0.968
Q9UK33	Zinc finger protein 580 OS=Homo sapiens GN=ZNF580 PE=1 SV=1	2	18.7
Q9UK32	Ribosomal protein S6 kinase alpha-6 OS=Homo sapiens GN=RPS6KA6 PE=1 SV=1	6	83.8	0.86	0.806	0.811	0.779	0.675
Q9UK22	F-box only protein 2 OS=Homo sapiens GN=FBXO2 PE=1 SV=2	41	33.3	0.766	0.868	1.064	1.034	0.864
Q9UK17	Potassium voltage-gated channel subfamily D member 3 OS=Homo sapiens GN=KCND3 PE=1 SV=3	18	73.4	0.847	1.007	0.93	0.918	0.784
Q9UJZ1	Stomatin-like protein 2, mitochondrial OS=Homo sapiens GN=STOML2 PE=1 SV=1	52	38.5	0.951	1.118	0.921	0.889	0.877
Q9UJY5-6	Isoform 6 of ADP-ribosylation factor-binding protein GGA1 OS=Homo sapiens GN=GGA1	8	72.2	1.307	1.07	1.011	0.728	0.908
Q9UJY4	ADP-ribosylation factor-binding protein GGA2 OS=Homo sapiens GN=GGA2 PE=1 SV=3	2	67.1	0.863	1.009	0.908	0.892	0.891
Q9UJY1	Heat shock protein beta-8 OS=Homo sapiens GN=HSPB8 PE=1 SV=1	10	21.6	1.122	1.04	1.201	1.571	1.313
Q9UJW0	Dynactin subunit 4 OS=Homo sapiens GN=DCTN4 PE=1 SV=1	20	52.3	1.011	1.058	1.015	0.993	1.041
Q9UJU6	Drebrin-like protein OS=Homo sapiens GN=DBNL PE=1 SV=1	44	48.2	0.925	0.913	0.91	0.804	0.755
Q9UJS0-2	Isoform 2 of Calcium-binding mitochondrial carrier protein Aralar2 OS=Homo sapiens GN=SLC25A13	33	74.3	1.158	1.34	1.163	1.137	1.272
Q9UJQ1	Lysosome-associated membrane glycoprotein 5 OS=Homo sapiens GN=LAMP5 PE=1 SV=1	4	31.5	0.937	1.073	0.862	0.931	0.708
Q9UJF2-2	Isoform 2 of Ras GTPase-activating protein nGAP OS=Homo sapiens GN=RASAL2	8	143.8	0.631	0.892	1.045	0.973	0.633
Q9UJD0	Regulating synaptic membrane exocytosis protein 3 OS=Homo sapiens GN=RIMS3 PE=1 SV=1	16	32.8	0.977	0.965	0.916	0.948	0.832
Q9UJC5	SH3 domain-binding glutamic acid-rich-like protein 2 OS=Homo sapiens GN=SH3BGRL2 PE=1 SV=2	16	12.3	0.794	0.93	1.018	1.402	1.191
Q9UJC3	Protein Hook homolog 1 OS=Homo sapiens GN=HOOK1 PE=1 SV=2	5	84.6	0.916	0.903	0.859	0.797	0.704
Q9UJ83	2-hydroxyacyl-CoA lyase 1 OS=Homo sapiens GN=HACL1 PE=1 SV=2	2	63.7	1.449	1.367	1.243	1.171	1.387
Q9UJ70-2	Isoform 2 of N-acetyl-D-glucosamine kinase OS=Homo sapiens GN=NAGK	30	42	1.065	0.944	1.077	1.034	0.925
Q9UJ68	Mitochondrial peptide methionine sulfoxide reductase OS=Homo sapiens GN=MSRA PE=1 SV=1	15	26.1	1.069	0.972	1.072	1.098	1.029
Q9UJ41	Rab5 GDP/GTP exchange factor OS=Homo sapiens GN=RABGEF1 PE=1 SV=2	16	79.3	0.864	0.886	0.942	0.827	0.784
Q9UJ04	Testis-specific Y-encoded-like protein 4 OS=Homo sapiens GN=TSPYL4 PE=1 SV=2	8	45.1	1.016	1.058	1.1	1.146	1.006
Q9UIW2	Plexin-A1 OS=Homo sapiens GN=PLXNA1 PE=1 SV=3	90	210.9	0.972	0.962	1.007	0.871	0.894
Q9UIU0	Dihydropyridine receptor alpha 2 subunit OS=Homo sapiens GN=CACNA2D1 PE=4 SV=1	140	125.2	1.027	1.074	0.951	0.955	0.942
Q9UIL1	Short coiled-coil protein OS=Homo sapiens GN=SCOC PE=1 SV=2	5	18	1.194	0.995	1.05	0.988	1.233
Q9UII2	ATPase inhibitor, mitochondrial OS=Homo sapiens GN=ATPIF1 PE=1 SV=1	31	12.2	1.049	1.173	1.045	0.958	0.862
Q9UIG0	Tyrosine-protein kinase BAZ1B OS=Homo sapiens GN=BAZ1B PE=1 SV=2	6	170.8	1.534	1.523	1.431	1.523	1.576
Q9UID3	Vacuolar protein sorting-associated protein 51 homolog OS=Homo sapiens GN=VPS51 PE=1 SV=2	20	86	1.14	1.137	1.127	0.982	1.114
Q9UIC8-2	Isoform 2 of Leucine carboxyl methyltransferase 1 OS=Homo sapiens GN=LCMT1	10	41.1	0.997	1.025	1.035	1.02	0.97
Q9UI40-2	Isoform 2 of Sodium/potassium/calcium exchanger 2 OS=Homo sapiens GN=SLC24A2	61	71.6	1.121	1.113	0.975	0.98	1.248
Q9UI40	Sodium/potassium/calcium exchanger 2 OS=Homo sapiens GN=SLC24A2 PE=1 SV=1	61	73.6	1.067	1.273	1.059	0.942	1.18
Q9UI32	Glutaminase liver isoform, mitochondrial OS=Homo sapiens GN=GLS2 PE=1 SV=2	8	66.3	0.87	0.919	0.94	0.791	0.813
Q9UI30	Multifunctional methyltransferase subunit TRM112-like protein OS=Homo sapiens GN=TRMT112 PE=1 SV=1	2	14.2	0.876	0.89	0.832	1.303	0.959
Q9UI15	Transgelin-3 OS=Homo sapiens GN=TAGLN3 PE=1 SV=2	196	22.5	0.945	0.982	0.909	0.793	0.855
Q9UI14	Prenylated Rab acceptor protein 1 OS=Homo sapiens GN=RABAC1 PE=1 SV=1	2	20.6
Q9UI12	V-type proton ATPase subunit H OS=Homo sapiens GN=ATP6V1H PE=1 SV=1	112	55.8	0.937	0.989	0.966	0.934	0.894
Q9UI09	NADH dehydrogenase [ubiquinone] 1 alpha subcomplex subunit 12 OS=Homo sapiens GN=NDUFA12 PE=1 SV=1	73	17.1	0.849	1.027	0.863	0.779	0.843
Q9UI08-2	Isoform 1 of Ena/VASP-like protein OS=Homo sapiens GN=EVL	43	44.8	1.031	1.113	1.037	0.936	0.913
Q9UHY7	Enolase-phosphatase E1 OS=Homo sapiens GN=ENOPH1 PE=1 SV=1	29	28.9	0.999	0.957	0.939	0.922	1.025
Q9UHY1	Nuclear receptor-binding protein OS=Homo sapiens GN=NRBP1 PE=1 SV=1	16	59.8	0.876	0.897	0.844	0.718	0.614
Q9UHX1	Poly(U)-binding-splicing factor PUF60 OS=Homo sapiens GN=PUF60 PE=1 SV=1	12	59.8	0.934	0.975	0.975	0.844	0.921
Q9UHW9-3	Isoform 3 of Solute carrier family 12 member 6 OS=Homo sapiens GN=SLC12A6	12	125.9	1.036	1.004	1.082	1	0.959
Q9UHV9	Prefoldin subunit 2 OS=Homo sapiens GN=PFDN2 PE=1 SV=1	22	16.6	1.101	0.988	1.049	1.055	1.086
Q9UHQ9	NADH-cytochrome b5 reductase 1 OS=Homo sapiens GN=CYB5R1 PE=1 SV=1	16	34.1	0.822	1.019	0.877	1.009	0.85
Q9UHQ4-2	Isoform 2 of B-cell receptor-associated protein 29 OS=Homo sapiens GN=BCAP29	53	40.8	1.126	1.141	1.064	0.974	0.985
Q9UHP3-3	Isoform USP25m of Ubiquitin carboxyl-terminal hydrolase 25 OS=Homo sapiens GN=USP25	5	129.9	1.085	1.393	1.093	0.976	1.095
Q9UHN6	Transmembrane protein 2 OS=Homo sapiens GN=TMEM2 PE=1 SV=1	2	154.3
Q9UHL4	Dipeptidyl peptidase 2 OS=Homo sapiens GN=DPP7 PE=1 SV=3	12	54.3	0.971	1.333	0.985	1.088	0.975
Q9UHG3	Prenylcysteine oxidase 1 OS=Homo sapiens GN=PCYOX1 PE=1 SV=3	30	56.6	0.969	1.097	0.969	1.031	1.104
Q9UHG2	ProSAAS OS=Homo sapiens GN=PCSK1N PE=1 SV=1	78	27.4	0.951	0.911	0.953	0.943	0.92
Q9UHF0-2	Isoform 2 of Tachykinin-3 OS=Homo sapiens GN=TAC3	8	14.8	1.014	0.956	1.037	1.144	0.91
Q9UHD9	Ubiquilin-2 OS=Homo sapiens GN=UBQLN2 PE=1 SV=2	61	65.7	1.079	1.062	1.032	1.013	1.044
Q9UHD2	Serine/threonine-protein kinase TBK1 OS=Homo sapiens GN=TBK1 PE=1 SV=1	10	83.6	0.918	0.947	0.878	0.84	0.8
Q9UHB9	Signal recognition particle subunit SRP68 OS=Homo sapiens GN=SRP68 PE=1 SV=2	38	70.7	0.927	0.877	0.891	0.837	0.883
Q9UHA4	Ragulator complex protein LAMTOR3 OS=Homo sapiens GN=LAMTOR3 PE=1 SV=1	6	13.6	0.946	0.993	1.024	1.045	1.036
Q9UH62	Armadillo repeat-containing X-linked protein 3 OS=Homo sapiens GN=ARMCX3 PE=1 SV=1	11	42.5	0.718	0.889	0.867	1.031	0.848
Q9UH03-2	Isoform 2 of Neuronal-specific septin-3 OS=Homo sapiens GN=SEPT3	109	40.1	0.899	0.959	0.928	0.909	0.789
Q9UGQ3	Solute carrier family 2, facilitated glucose transporter member 6 OS=Homo sapiens GN=SLC2A6 PE=1 SV=2	2	54.5	0.883	1.107	1.029	0.932	1.036
Q9UGM6	Tryptophan--tRNA ligase, mitochondrial OS=Homo sapiens GN=WARS2 PE=1 SV=1	4	40.1	0.786	0.933	0.825	0.652	0.62
Q9UGJ0	5'-AMP-activated protein kinase subunit gamma-2 OS=Homo sapiens GN=PRKAG2 PE=1 SV=1	6	63	0.928	0.902	0.907	0.887	0.727
Q9UGC6	Regulator of G-protein signaling 17 OS=Homo sapiens GN=RGS17 PE=1 SV=2	12	24.3	1.196	1.126	1.537	1.436	1.318
Q9UG63-2	Isoform 2 of ATP-binding cassette sub-family F member 2 OS=Homo sapiens GN=ABCF2	6	72.4	0.997	0.909	0.874	0.801	0.884
Q9UG56	Phosphatidylserine decarboxylase proenzyme, mitochondrial OS=Homo sapiens GN=PISD PE=2 SV=4	2	46.6	1.004	1.229	1.104	0.757	0.871
Q9UFN0	Protein NipSnap homolog 3A OS=Homo sapiens GN=NIPSNAP3A PE=1 SV=2	27	28.4	1	1.058	0.952	1.338	1.093
Q9UFG5-2	Isoform 2 of UPF0449 protein C19orf25 OS=Homo sapiens GN=C19orf25	4	17.2	0.95	0.977	0.939	0.806	0.8
Q9UF56	F-box/LRR-repeat protein 17 OS=Homo sapiens GN=FBXL17 PE=2 SV=3	2	75.6	1.151	0.428	1.612	1.682	1.157
Q9UEY8-2	Isoform 1 of Gamma-adducin OS=Homo sapiens GN=ADD3	114	75.6	1.085	1.013	1.092	1.289	1.304
Q9UEW8	STE20/SPS1-related proline-alanine-rich protein kinase OS=Homo sapiens GN=STK39 PE=1 SV=3	28	59.4	0.961	0.979	0.924	0.911	0.911
Q9UDY4	DnaJ homolog subfamily B member 4 OS=Homo sapiens GN=DNAJB4 PE=1 SV=1	19	37.8	1.091	1.086	0.904	0.86	0.81
Q9UDW1	Cytochrome b-c1 complex subunit 9 OS=Homo sapiens GN=UQCR10 PE=1 SV=3	3	7.3	1.01	1.426	0.924	1.044	1.283
Q9UD71	Protein phosphatase 1 regulatory subunit 1B OS=Homo sapiens GN=PPP1R1B PE=1 SV=2	30	22.9	0.764	0.682	0.743	0.702	0.754
Q9UBY8	Protein CLN8 OS=Homo sapiens GN=CLN8 PE=1 SV=3	4	32.8	0.897	1.106	0.895	0.952	1.004
Q9UBW8	COP9 signalosome complex subunit 7a OS=Homo sapiens GN=COPS7A PE=1 SV=1	16	30.3	0.98	0.987	0.897	0.957	1.008
Q9UBV8	Peflin OS=Homo sapiens GN=PEF1 PE=1 SV=1	9	30.4	0.887	1.179	0.905	1.034	0.996
Q9UBV2	Protein sel-1 homolog 1 OS=Homo sapiens GN=SEL1L PE=1 SV=3	12	88.7	0.914	1.088	0.997	0.917	0.864
Q9UBS9-2	Isoform 2 of SUN domain-containing ossification factor OS=Homo sapiens GN=SUCO	2	156.3	1.145	0.965	1.004	0.784	1.098
Q9UBS4	DnaJ homolog subfamily B member 11 OS=Homo sapiens GN=DNAJB11 PE=1 SV=1	20	40.5	0.933	0.998	0.918	0.912	0.916
Q9UBQ7	Glyoxylate reductase/hydroxypyruvate reductase OS=Homo sapiens GN=GRHPR PE=1 SV=1	42	35.6	1.074	0.952	1.038	1.137	1.206
Q9UBQ5	Eukaryotic translation initiation factor 3 subunit K OS=Homo sapiens GN=EIF3K PE=1 SV=1	8	25	0.851	0.955	0.834	0.88	0.845
Q9UBL6	Copine-7 OS=Homo sapiens GN=CPNE7 PE=1 SV=1	31	70.2	0.86	0.825	0.878	0.748	0.586
Q9UBL0-3	Isoform 3 of cAMP-regulated phosphoprotein 21 OS=Homo sapiens GN=ARPP21	6	88.5	0.833	0.734	0.761	0.746	0.543
Q9UBI9	Headcase protein homolog OS=Homo sapiens GN=HECA PE=1 SV=1	2	58.8	0.766	0.958	1.108	1.193	1.373
Q9UBI6	Guanine nucleotide-binding protein G(I)/G(S)/G(O) subunit gamma-12 OS=Homo sapiens GN=GNG12 PE=1 SV=3	48	8	1.102	1.128	1.174	1.558	1.48
Q9UBG0	C-type mannose receptor 2 OS=Homo sapiens GN=MRC2 PE=1 SV=2	6	166.6	1.218	1.166	1.253	0.973	1.122
Q9UBF2	Coatomer subunit gamma-2 OS=Homo sapiens GN=COPG2 PE=1 SV=1	5	97.6	0.972	0.995	1.281	1.775	1.6
Q9UBC2-2	Isoform 2 of Epidermal growth factor receptor substrate 15-like 1 OS=Homo sapiens GN=EPS15L1	58	99.5	0.849	0.941	0.866	0.81	0.736
Q9UBB6-3	Isoform 3 of Neurochondrin OS=Homo sapiens GN=NCDN	92	79.1	1.042	0.955	1.106	1	0.969
Q9UBB4	Ataxin-10 OS=Homo sapiens GN=ATXN10 PE=1 SV=1	33	53.5	0.94	0.9	0.981	0.983	0.956
Q9P2Z7	Major myelin proteolipid (Fragment) OS=Homo sapiens GN=PLP PE=4 SV=1	40	8.9	0.345	0.692	1.014	0.857	1.383
Q9P2W9	Syntaxin-18 OS=Homo sapiens GN=STX18 PE=1 SV=1	10	38.7	0.986	1.024	0.917	1.108	1.121
Q9P2W3	Guanine nucleotide-binding protein G(I)/G(S)/G(O) subunit gamma-13 OS=Homo sapiens GN=GNG13 PE=3 SV=1	11	7.9	0.968	1.16	0.954	0.832	0.883
Q9P2U8	Vesicular glutamate transporter 2 OS=Homo sapiens GN=SLC17A6 PE=2 SV=1	16	64.4	0.829	1.067	0.879	0.852	0.71
Q9P2U7	Vesicular glutamate transporter 1 OS=Homo sapiens GN=SLC17A7 PE=2 SV=1	49	61.6	1.052	1.088	0.986	0.875	0.747
Q9P2S2	Neurexin-2 OS=Homo sapiens GN=NRXN2 PE=2 SV=1	45	184.9	0.956	1.029	0.935	0.855	0.722
Q9P2R3-4	Isoform 4 of Rabankyrin-5 OS=Homo sapiens GN=ANKFY1	30	132.7	0.972	0.965	1.004	1	1.004
Q9P2Q2	FERM domain-containing protein 4A OS=Homo sapiens GN=FRMD4A PE=1 SV=3	6	115.4	0.843	0.854	0.878	0.914	0.898
Q9P2P5	E3 ubiquitin-protein ligase HECW2 OS=Homo sapiens GN=HECW2 PE=1 SV=2	16	175.7	1.019	0.958	0.994	0.83	0.821
Q9P2K3-3	Isoform 3 of REST corepressor 3 OS=Homo sapiens GN=RCOR3	2	61.2	1.017	1.099	1.17	0.908	0.907
Q9P2H5	Ubiquitin carboxyl-terminal hydrolase 35 OS=Homo sapiens GN=USP35 PE=1 SV=3	6	113.3	0.832	0.873	0.856	0.671	0.586
Q9P2G1	Ankyrin repeat and IBR domain-containing protein 1 OS=Homo sapiens GN=ANKIB1 PE=1 SV=3	8	121.9	1.048	1.008	0.922	0.902	0.941
Q9P2D8-3	Isoform 3 of Protein unc-79 homolog OS=Homo sapiens GN=UNC79	2	297.4	0.643	0.669	0.741	1.03	0.976
Q9P2B2	Prostaglandin F2 receptor negative regulator OS=Homo sapiens GN=PTGFRN PE=1 SV=2	24	98.5	1.025	1.193	0.988	1.066	1.008
Q9P2A4	ABI gene family member 3 OS=Homo sapiens GN=ABI3 PE=1 SV=2	2	39	0.909	0.904	0.909	0.913	0.886
Q9P273	Teneurin-3 OS=Homo sapiens GN=TENM3 PE=2 SV=3	6	300.8	1.058	1.073	1.126	1.246	1.104
Q9P266	Junctional protein associated with coronary artery disease OS=Homo sapiens GN=KIAA1462 PE=1 SV=3	2	148.3
Q9P265	Disco-interacting protein 2 homolog B OS=Homo sapiens GN=DIP2B PE=1 SV=3	26	171.4	1.091	0.995	1.018	1.109	1.145
Q9P260-2	Isoform 2 of LisH domain and HEAT repeat-containing protein KIAA1468 OS=Homo sapiens GN=KIAA1468	30	138.7	0.881	0.868	0.855	0.842	0.63
Q9P253	Vacuolar protein sorting-associated protein 18 homolog OS=Homo sapiens GN=VPS18 PE=1 SV=2	18	110.1	0.845	0.934	0.892	0.903	0.831
Q9P246-2	Isoform 2 of Stromal interaction molecule 2 OS=Homo sapiens GN=STIM2	4	93.9	0.959	0.904	0.917	0.814	0.743
Q9P242	Neuronal tyrosine-phosphorylated phosphoinositide-3-kinase adapter 2 OS=Homo sapiens GN=NYAP2 PE=1 SV=3	4	70.5	0.948	0.774	0.837	0.667	0.662
Q9P232	Contactin-3 OS=Homo sapiens GN=CNTN3 PE=1 SV=3	18	112.8	0.967	0.926	0.902	0.87	0.71
Q9P227	Rho GTPase-activating protein 23 OS=Homo sapiens GN=ARHGAP23 PE=1 SV=2	20	162.1	0.96	0.925	0.92	0.885	0.868
Q9P206-2	Isoform 2 of Uncharacterized protein KIAA1522 OS=Homo sapiens GN=KIAA1522	3	113	1.332	0.95	1.162	1.241	1.091
Q9P1Z2	Calcium-binding and coiled-coil domain-containing protein 1 OS=Homo sapiens GN=CALCOCO1 PE=1 SV=2	18	77.3	0.844	0.892	0.825	0.791	0.677
Q9P1Y5-2	Isoform 2 of Calmodulin-regulated spectrin-associated protein 3 OS=Homo sapiens GN=CAMSAP3	31	137.8	1.018	0.976	0.989	0.883	0.754
Q9P1U1	Actin-related protein 3B OS=Homo sapiens GN=ACTR3B PE=2 SV=1	53	47.6	0.821	0.869	0.889	0.914	0.828
Q9P1F3	Costars family protein ABRACL OS=Homo sapiens GN=ABRACL PE=1 SV=1	2	9.1
Q9P0U4-2	Isoform 2 of CXXC-type zinc finger protein 1 OS=Homo sapiens GN=CXXC1	2	76.2	1.042	1.043	0.951	0.754	0.913
Q9P0U1	Mitochondrial import receptor subunit TOM7 homolog OS=Homo sapiens GN=TOMM7 PE=1 SV=1	8	6.2	0.832	0.989	0.886	0.655	0.727
Q9P0T4	Zinc finger protein 581 OS=Homo sapiens GN=ZNF581 PE=1 SV=1	2	22	0.998	1.046	1.072	0.857	1.081
Q9P0R6	GSK3-beta interaction protein OS=Homo sapiens GN=GSKIP PE=1 SV=2	2	15.6	1.027	0.891	0.822	0.82	0.831
Q9P0M9	39S ribosomal protein L27, mitochondrial OS=Homo sapiens GN=MRPL27 PE=1 SV=1	2	16.1
Q9P0M6	Core histone macro-H2A.2 OS=Homo sapiens GN=H2AFY2 PE=1 SV=3	14	40	0.892	0.872	0.957	0.767	0.693
Q9P0L2	Serine/threonine-protein kinase MARK1 OS=Homo sapiens GN=MARK1 PE=1 SV=2	24	88.9	0.866	0.891	0.783	0.734	0.696
Q9P0L0	Vesicle-associated membrane protein-associated protein A OS=Homo sapiens GN=VAPA PE=1 SV=3	77	27.9	1.202	1.239	1.352	1.202	1.398
Q9P0K9	DOMON domain-containing protein FRRS1L OS=Homo sapiens GN=FRRS1L PE=1 SV=2	14	37.2	0.999	0.946	1.078	1.05	0.921
Q9P0K7-2	Isoform 2 of Ankycorbin OS=Homo sapiens GN=RAI14	2	110.4
Q9P0K1	Disintegrin and metalloproteinase domain-containing protein 22 OS=Homo sapiens GN=ADAM22 PE=1 SV=1	88	100.4	1.119	1.366	1.34	1.441	1.722
Q9P0J0	NADH dehydrogenase [ubiquinone] 1 alpha subcomplex subunit 13 OS=Homo sapiens GN=NDUFA13 PE=1 SV=3	36	16.7	0.911	1.021	0.99	1.009	1.022
Q9P0I2	ER membrane protein complex subunit 3 OS=Homo sapiens GN=EMC3 PE=1 SV=3	2	29.9	0.551	0.805	0.643	0.421	0.355
Q9P0H9	RER1 protein OS=Homo sapiens GN=RER1 PE=1 SV=1	2	24.8	1.051	1.357	1.086	1.312	1.113
Q9P0H2	Glutamate receptor subunit 3 OS=Homo sapiens GN=GRIA3 PE=3 SV=1	29	101.1	0.676	0.826	0.707	0.696	0.457
Q9P0C9	HSPC107 (Fragment) OS=Homo sapiens PE=2 SV=1	2	17.4	0.959	1.069	1.082	0.958	1.135
Q9P035	Very-long-chain (3R)-3-hydroxyacyl-CoA dehydratase 3 OS=Homo sapiens GN=HACD3 PE=1 SV=2	18	43.1	0.807	0.985	0.867	0.867	0.845
Q9P032	NADH dehydrogenase [ubiquinone] 1 alpha subcomplex assembly factor 4 OS=Homo sapiens GN=NDUFAF4 PE=1 SV=1	12	20.3	0.794	1.007	0.786	0.696	0.813
Q9P021	Cysteine-rich PDZ-binding protein OS=Homo sapiens GN=CRIPT PE=1 SV=1	2	11.2	1.033	1.034	1.363	1.627	1.885
Q9P013	Spliceosome-associated protein CWC15 homolog OS=Homo sapiens GN=CWC15 PE=1 SV=2	4	26.6	0.863	1.12	1.101	0.995	1.035
Q9NZZ3	Charged multivesicular body protein 5 OS=Homo sapiens GN=CHMP5 PE=1 SV=1	18	24.6	1.452	1.245	1.241	1.038	1.371
Q9NZW5	MAGUK p55 subfamily member 6 OS=Homo sapiens GN=MPP6 PE=1 SV=2	43	61.1	0.845	0.857	0.848	0.802	0.691
Q9NZU7	Calcium-binding protein 1 OS=Homo sapiens GN=CABP1 PE=1 SV=5	11	39.8	0.786	0.998	0.754	0.761	0.769
Q9NZU5	LIM and cysteine-rich domains protein 1 OS=Homo sapiens GN=LMCD1 PE=1 SV=1	2	40.8	0.774	0.741	0.819	0.946	1.006
Q9NZR2	Low-density lipoprotein receptor-related protein 1B OS=Homo sapiens GN=LRP1B PE=1 SV=2	15	515.2	1.221	1.062	1.273	1.127	1.22
Q9NZQ3	NCK-interacting protein with SH3 domain OS=Homo sapiens GN=NCKIPSD PE=1 SV=1	25	78.9	0.97	1.019	0.956	0.848	0.804
Q9NZN5	Rho guanine nucleotide exchange factor 12 OS=Homo sapiens GN=ARHGEF12 PE=1 SV=1	27	173.1	0.909	0.922	0.963	0.982	0.996
Q9NZN4	EH domain-containing protein 2 OS=Homo sapiens GN=EHD2 PE=1 SV=2	19	61.1	0.77	0.874	0.801	0.769	0.682
Q9NZN3	EH domain-containing protein 3 OS=Homo sapiens GN=EHD3 PE=1 SV=2	83	60.8	1.004	0.924	0.987	0.771	0.716
Q9NZN1	Interleukin-1 receptor accessory protein-like 1 OS=Homo sapiens GN=IL1RAPL1 PE=1 SV=2	2	79.9	1.114	1.935	1.006	1.093	0.504
Q9NZM3	Intersectin-2 OS=Homo sapiens GN=ITSN2 PE=1 SV=3	16	193.3	1.188	1.07	1.157	0.762	0.764
Q9NZM1	Myoferlin OS=Homo sapiens GN=MYOF PE=1 SV=1	2	234.6	0.998	1.157	1.041	1.077	1.099
Q9NZL4-3	Isoform 3 of Hsp70-binding protein 1 OS=Homo sapiens GN=HSPBP1	8	44.5	1.073	1.045	1.083	1	1.055
Q9NZJ6	Ubiquinone biosynthesis O-methyltransferase, mitochondrial OS=Homo sapiens GN=COQ3 PE=1 SV=3	15	41	1.06	1.258	1.064	1.15	1.063
Q9NZJ4	Sacsin OS=Homo sapiens GN=SACS PE=1 SV=2	14	520.8	1.208	1.35	1.194	1.123	1.067
Q9NZE8	39S ribosomal protein L35, mitochondrial OS=Homo sapiens GN=MRPL35 PE=1 SV=3	2	21.5	0.845	1.004	0.844	0.843	0.75
Q9NZB2-6	Isoform F of Constitutive coactivator of PPAR-gamma-like protein 1 OS=Homo sapiens GN=FAM120A	30	125.2	0.946	0.994	0.916	0.916	0.895
Q9NZ56	Formin-2 OS=Homo sapiens GN=FMN2 PE=1 SV=4	34	180	0.942	0.892	0.911	0.965	0.843
Q9NZ53	Podocalyxin-like protein 2 OS=Homo sapiens GN=PODXL2 PE=1 SV=1	10	65	0.609	0.955	0.625	0.888	0.678
Q9NZ52	ADP-ribosylation factor-binding protein GGA3 OS=Homo sapiens GN=GGA3 PE=1 SV=1	14	78.3	1.025	0.959	0.984	0.822	0.858
Q9NZ43	Vesicle transport protein USE1 OS=Homo sapiens GN=USE1 PE=1 SV=2	4	29.4	1.107	1.076	1.042	1.026	1.046
Q9NZ32	Actin-related protein 10 OS=Homo sapiens GN=ACTR10 PE=1 SV=1	14	46.3	1.248	1.001	1.074	0.921	0.921
Q9NZ09-4	Isoform 4 of Ubiquitin-associated protein 1 OS=Homo sapiens GN=UBAP1	2	61.8	0.961	0.937	0.927	0.716	0.809
Q9NZ08-2	Isoform 2 of Endoplasmic reticulum aminopeptidase 1 OS=Homo sapiens GN=ERAP1	2	107.8	0.793	0.906	0.781	0.869	0.968
Q9NYU2	UDP-glucose:glycoprotein glucosyltransferase 1 OS=Homo sapiens GN=UGGT1 PE=1 SV=3	60	177.1	0.975	1.025	0.99	0.996	1.037
Q9NYS7-2	Isoform 2 of WD repeat and SOCS box-containing protein 2 OS=Homo sapiens GN=WSB2	1	47.2
Q9NYK5-2	Isoform 2 of 39S ribosomal protein L39, mitochondrial OS=Homo sapiens GN=MRPL39	2	40.4	0.764	0.993	1.105	1.478	1.296
Q9NYI0	PH and SEC7 domain-containing protein 3 OS=Homo sapiens GN=PSD3 PE=1 SV=2	91	116	0.951	0.86	0.87	0.736	0.589
Q9NYF8	Bcl-2-associated transcription factor 1 OS=Homo sapiens GN=BCLAF1 PE=1 SV=2	16	106.1	0.728	0.881	0.745	0.765	0.639
Q9NYB0	Telomeric repeat-binding factor 2-interacting protein 1 OS=Homo sapiens GN=TERF2IP PE=1 SV=1	8	44.2	0.948	0.981	0.949	0.86	0.849
Q9NY64	Solute carrier family 2, facilitated glucose transporter member 8 OS=Homo sapiens GN=SLC2A8 PE=1 SV=3	2	50.8
Q9NY59	Sphingomyelin phosphodiesterase 3 OS=Homo sapiens GN=SMPD3 PE=1 SV=1	31	71	1.002	1.099	0.902	0.85	0.839
Q9NY47	Voltage-dependent calcium channel subunit alpha-2/delta-2 OS=Homo sapiens GN=CACNA2D2 PE=1 SV=2	42	129.7	0.897	1.094	1.028	0.998	0.889
Q9NY27	Serine/threonine-protein phosphatase 4 regulatory subunit 2 OS=Homo sapiens GN=PPP4R2 PE=1 SV=3	2	46.9	0.563	0.739	0.668	0.845	0.639
Q9NXW9	Alpha-ketoglutarate-dependent dioxygenase alkB homolog 4 OS=Homo sapiens GN=ALKBH4 PE=1 SV=1	4	33.8	0.946	0.955	1.043	1.068	1.011
Q9NXV6	CDKN2A-interacting protein OS=Homo sapiens GN=CDKN2AIP PE=1 SV=3	3	61.1
Q9NXV2	BTB/POZ domain-containing protein KCTD5 OS=Homo sapiens GN=KCTD5 PE=1 SV=1	1	26.1	1.076	1.177	1.014	1.144	1.473
Q9NXS2	Glutaminyl-peptide cyclotransferase-like protein OS=Homo sapiens GN=QPCTL PE=1 SV=2	2	42.9	0.981	1.012	1.053	0.942	0.83
Q9NXR7	BRCA1-A complex subunit BRE OS=Homo sapiens GN=BRE PE=1 SV=2	6	43.5	1.293	1.021	1.314	1.455	1.354
Q9NXR1	Nuclear distribution protein nudE homolog 1 OS=Homo sapiens GN=NDE1 PE=1 SV=2	6	38.8	1.379	0.989	1.121	1.199	1.297
Q9NXG6-3	Isoform 3 of Transmembrane prolyl 4-hydroxylase OS=Homo sapiens GN=P4HTM	2	63.1	0.825	1.067	0.874	1.006	0.862
Q9NXE4-4	Isoform 4 of Sphingomyelin phosphodiesterase 4 OS=Homo sapiens GN=SMPD4	2	98.1
Q9NX76	CKLF-like MARVEL transmembrane domain-containing protein 6 OS=Homo sapiens GN=CMTM6 PE=1 SV=1	2	20.4	0.783	1.046	0.804	0.943	1.093
Q9NX62	Inositol monophosphatase 3 OS=Homo sapiens GN=IMPAD1 PE=1 SV=1	4	38.7	1.091	1.1	1.067	0.759	0.902
Q9NX47	E3 ubiquitin-protein ligase MARCH5 OS=Homo sapiens GN=MARCH5 PE=1 SV=1	6	31.2	1.096	0.984	0.987	1.446	0.886
Q9NX46	Poly(ADP-ribose) glycohydrolase ARH3 OS=Homo sapiens GN=ADPRHL2 PE=1 SV=1	18	38.9	1.05	1.048	1.175	1.164	1.15
Q9NX40	OCIA domain-containing protein 1 OS=Homo sapiens GN=OCIAD1 PE=1 SV=1	30	27.6	1.13	1.209	1.215	1.124	1.057
Q9NX24	H/ACA ribonucleoprotein complex subunit 2 OS=Homo sapiens GN=NHP2 PE=1 SV=1	3	17.2	0.783	0.949	0.831	0.953	1.01
Q9NX18	Succinate dehydrogenase assembly factor 2, mitochondrial OS=Homo sapiens GN=SDHAF2 PE=1 SV=1	2	19.6	1.416	1.358	1.317	1.033	1.372
Q9NX14-2	Isoform 2 of NADH dehydrogenase [ubiquinone] 1 beta subcomplex subunit 11, mitochondrial OS=Homo sapiens GN=NDUFB11	31	18.4	0.959	1.08	0.924	0.898	0.934
Q9NX08	COMM domain-containing protein 8 OS=Homo sapiens GN=COMMD8 PE=1 SV=1	10	21.1	0.886	0.958	0.931	0.971	0.918
Q9NX05	Constitutive coactivator of PPAR-gamma-like protein 2 OS=Homo sapiens GN=FAM120C PE=2 SV=3	6	120.5	0.835	0.656	0.966	0.857	0.868
Q9NX00	Transmembrane protein 160 OS=Homo sapiens GN=TMEM160 PE=1 SV=1	6	19.6	0.822	1.128	0.807	1.012	0.877
Q9NWV4	UPF0587 protein C1orf123 OS=Homo sapiens GN=C1orf123 PE=1 SV=1	8	18	0.998	0.846	1.27	1.108	1.141
Q9NWU2	Glucose-induced degradation protein 8 homolog OS=Homo sapiens GN=GID8 PE=1 SV=1	6	26.7	0.98	0.947	0.932	0.925	0.812
Q9NWS8	Required for meiotic nuclear division protein 1 homolog OS=Homo sapiens GN=RMND1 PE=1 SV=2	8	51.6	0.708	1.138	0.942	0.878	0.889
Q9NWQ8	Phosphoprotein associated with glycosphingolipid-enriched microdomains 1 OS=Homo sapiens GN=PAG1 PE=1 SV=2	5	47	0.91	1.04	0.98	0.988	1.082
Q9NWM3	CUE domain-containing protein 1 OS=Homo sapiens GN=CUEDC1 PE=1 SV=1	7	42.2	1.24	1.064	1.102	1.115	1.393
Q9NWD8	Transmembrane protein 248 OS=Homo sapiens GN=TMEM248 PE=1 SV=1	2	35	0.911	0.977	1.002	1.09	0.94
Q9NWB6	Arginine and glutamate-rich protein 1 OS=Homo sapiens GN=ARGLU1 PE=1 SV=1	6	33.2	1.055	1.147	1.064	1.097	1.013
Q9NW68	BSD domain-containing protein 1 OS=Homo sapiens GN=BSDC1 PE=1 SV=1	5	47.1	0.99	0.927	0.919	0.76	0.766
Q9NW64	Pre-mRNA-splicing factor RBM22 OS=Homo sapiens GN=RBM22 PE=1 SV=1	2	46.9	0.693	0.861	0.804	0.765	0.72
Q9NVZ3-2	Isoform 2 of Adaptin ear-binding coat-associated protein 2 OS=Homo sapiens GN=NECAP2	2	29.4	1.234	1.14	1.261	1.47	1.965
Q9NVT9	Armadillo repeat-containing protein 1 OS=Homo sapiens GN=ARMC1 PE=1 SV=1	12	31.3	0.72	0.943	0.85	0.963	0.851
Q9NVS2-2	Isoform 2 of 28S ribosomal protein S18a, mitochondrial OS=Homo sapiens GN=MRPS18A	2	30.5
Q9NVM6	DnaJ homolog subfamily C member 17 OS=Homo sapiens GN=DNAJC17 PE=1 SV=1	4	34.7	0.99	1.017	1.053	0.744	0.774
Q9NVK5	FGFR1 oncogene partner 2 OS=Homo sapiens GN=FGFR1OP2 PE=1 SV=1	14	29.4	0.919	0.95	0.946	0.874	0.807
Q9NVI7-2	Isoform 2 of ATPase family AAA domain-containing protein 3A OS=Homo sapiens GN=ATAD3A	41	66.2	0.797	0.887	0.806	0.653	0.607
Q9NVH6-8	Isoform 8 of Trimethyllysine dioxygenase, mitochondrial OS=Homo sapiens GN=TMLHE	6	50.8	0.884	1.037	0.856	1.503	1.137
Q9NVH1	DnaJ homolog subfamily C member 11 OS=Homo sapiens GN=DNAJC11 PE=1 SV=2	28	63.2	0.929	1.022	0.91	0.851	0.78
Q9NVH0	Exonuclease 3'-5' domain-containing protein 2 OS=Homo sapiens GN=EXD2 PE=1 SV=2	10	70.3	0.949	0.974	1.028	1.151	1.074
Q9NVG8	TBC1 domain family member 13 OS=Homo sapiens GN=TBC1D13 PE=1 SV=3	10	46.5	0.922	0.852	0.979	0.948	0.896
Q9NVC3	Putative sodium-coupled neutral amino acid transporter 7 OS=Homo sapiens GN=SLC38A7 PE=1 SV=1	2	49.9
Q9NVA2-2	Isoform 2 of Septin-11 OS=Homo sapiens GN=SEPT11	150	50.8	0.801	0.848	0.836	0.926	0.76
Q9NVA1	Ubiquinol-cytochrome-c reductase complex assembly factor 1 OS=Homo sapiens GN=UQCC1 PE=1 SV=3	10	34.6	0.81	0.952	0.938	1.033	0.825
Q9NV96	Cell cycle control protein 50A OS=Homo sapiens GN=TMEM30A PE=1 SV=1	63	40.7	0.817	0.894	0.93	0.956	0.752
Q9NV92	NEDD4 family-interacting protein 2 OS=Homo sapiens GN=NDFIP2 PE=1 SV=2	2	36.4	0.816	0.919	0.923	0.965	0.877
Q9NUY8	TBC1 domain family member 23 OS=Homo sapiens GN=TBC1D23 PE=1 SV=3	6	78.3	0.893	0.931	0.929	0.946	0.883
Q9NUU7	ATP-dependent RNA helicase DDX19A OS=Homo sapiens GN=DDX19A PE=1 SV=1	16	53.9	0.949	0.929	0.916	0.907	0.885
Q9NUT2	ATP-binding cassette sub-family B member 8, mitochondrial OS=Homo sapiens GN=ABCB8 PE=1 SV=3	14	79.9	1.371	1.378	1.202	1.09	1.055
Q9NUQ7	Ufm1-specific protease 2 OS=Homo sapiens GN=UFSP2 PE=1 SV=3	8	53.2	1.1	1.024	1.238	0.708	0.891
Q9NUQ6-2	Isoform 2 of SPATS2-like protein OS=Homo sapiens GN=SPATS2L	8	54.1	0.951	0.948	0.949	0.969	0.86
Q9NUQ3	Gamma-taxilin OS=Homo sapiens GN=TXLNG PE=1 SV=2	2	60.5
Q9NUQ2	1-acyl-sn-glycerol-3-phosphate acyltransferase epsilon OS=Homo sapiens GN=AGPAT5 PE=1 SV=3	8	42	0.934	1.056	1.015	1.149	1.136
Q9NUN5	Probable lysosomal cobalamin transporter OS=Homo sapiens GN=LMBRD1 PE=1 SV=1	2	61.3	1.713	1.393	1.595	2.736	3.909
Q9NUL5	Repressor of yield of DENV protein OS=Homo sapiens GN=RYDEN PE=1 SV=2	8	33.1	0.892	1.055	0.838	0.854	0.787
Q9NUJ1	Mycophenolic acid acyl-glucuronide esterase, mitochondrial OS=Homo sapiens GN=ABHD10 PE=1 SV=1	22	33.9	0.754	0.949	0.951	1.145	1.068
Q9NUI1	Peroxisomal 2,4-dienoyl-CoA reductase OS=Homo sapiens GN=DECR2 PE=1 SV=1	6	30.8	0.827	0.945	0.884	0.647	0.593
Q9NUB1	Acetyl-coenzyme A synthetase 2-like, mitochondrial OS=Homo sapiens GN=ACSS1 PE=1 SV=2	17	74.8	0.943	0.906	0.966	0.919	0.933
Q9NTX5	Ethylmalonyl-CoA decarboxylase OS=Homo sapiens GN=ECHDC1 PE=1 SV=2	34	33.7	0.998	1.067	0.958	1.109	1.195
Q9NTM9	Copper homeostasis protein cutC homolog OS=Homo sapiens GN=CUTC PE=1 SV=1	2	29.3	0.873	0.886	0.943	1.374	1.224
Q9NTJ5	Phosphatidylinositide phosphatase SAC1 OS=Homo sapiens GN=SACM1L PE=1 SV=2	37	66.9	0.91	1.04	0.942	0.92	0.826
Q9NTJ4-4	Isoform 4 of Alpha-mannosidase 2C1 OS=Homo sapiens GN=MAN2C1	1	117.1
Q9NTI5	Sister chromatid cohesion protein PDS5 homolog B OS=Homo sapiens GN=PDS5B PE=1 SV=1	8	164.6	0.733	0.795	0.816	0.95	0.659
Q9NT99	Leucine-rich repeat-containing protein 4B OS=Homo sapiens GN=LRRC4B PE=2 SV=3	8	76.4	0.938	0.976	0.925	0.808	0.816
Q9NT62	Ubiquitin-like-conjugating enzyme ATG3 OS=Homo sapiens GN=ATG3 PE=1 SV=1	17	35.8	1.141	0.977	1.329	1.245	1.418
Q9NSY0	Nuclear receptor-binding protein 2 OS=Homo sapiens GN=NRBP2 PE=1 SV=2	8	57.8	0.994	0.916	0.869	0.866	0.91
Q9NSU2	Three-prime repair exonuclease 1 OS=Homo sapiens GN=TREX1 PE=1 SV=1	4	38.9	1.093	1.055	0.834	0.696	0.809
Q9NSK0-3	Isoform 3 of Kinesin light chain 4 OS=Homo sapiens GN=KLC4	28	70.5	1.026	0.984	0.985	0.878	0.971
Q9NSE4	Isoleucine--tRNA ligase, mitochondrial OS=Homo sapiens GN=IARS2 PE=1 SV=2	70	113.7	0.794	0.9	0.876	0.882	0.81
Q9NSD9	Phenylalanine--tRNA ligase beta subunit OS=Homo sapiens GN=FARSB PE=1 SV=3	76	66.1	0.82	0.858	0.815	0.831	0.727
Q9NS86	LanC-like protein 2 OS=Homo sapiens GN=LANCL2 PE=1 SV=1	66	50.8	0.846	0.867	0.877	0.978	0.838
Q9NS61-6	Isoform 6 of Kv channel-interacting protein 2 OS=Homo sapiens GN=KCNIP2	2	32.5	0.81	0.821	0.682	0.721	0.661
Q9NRZ7-3	Isoform 3 of 1-acyl-sn-glycerol-3-phosphate acyltransferase gamma OS=Homo sapiens GN=AGPAT3	12	45.5	0.846	0.924	0.835	0.831	0.783
Q9NRZ5	1-acyl-sn-glycerol-3-phosphate acyltransferase delta OS=Homo sapiens GN=AGPAT4 PE=1 SV=1	8	44	0.991	0.883	0.786	0.698	0.826
Q9NRY4	Rho GTPase-activating protein 35 OS=Homo sapiens GN=ARHGAP35 PE=1 SV=3	34	170.4	0.685	0.768	0.683	0.604	0.501
Q9NRX5	Serine incorporator 1 OS=Homo sapiens GN=SERINC1 PE=1 SV=1	4	50.5	0.932	1.092	1.138	1.578	1.061
Q9NRX2	39S ribosomal protein L17, mitochondrial OS=Homo sapiens GN=MRPL17 PE=1 SV=1	6	20	0.814	1.006	0.902	0.554	0.609
Q9NRW7	Vacuolar protein sorting-associated protein 45 OS=Homo sapiens GN=VPS45 PE=1 SV=1	16	65	0.808	0.869	0.843	0.767	0.615
Q9NRW1	Ras-related protein Rab-6B OS=Homo sapiens GN=RAB6B PE=1 SV=1	85	23.4	1.014	1.019	1.049	1.091	1.071
Q9NRV9	Heme-binding protein 1 OS=Homo sapiens GN=HEBP1 PE=1 SV=1	16	21.1	1.107	1.006	1.032	1.169	1.53
Q9NRU3	Metal transporter CNNM1 OS=Homo sapiens GN=CNNM1 PE=2 SV=3	8	104.3	0.906	1.011	0.922	0.86	0.838
Q9NRR3	CDC42 small effector protein 2 OS=Homo sapiens GN=CDC42SE2 PE=1 SV=1	6	9.2	1.362	1.308	1.132	1.068	1.4
Q9NRN7	L-aminoadipate-semialdehyde dehydrogenase-phosphopantetheinyl transferase OS=Homo sapiens GN=AASDHPPT PE=1 SV=2	21	35.8	0.765	0.77	0.776	0.721	0.71
Q9NRN5	Olfactomedin-like protein 3 OS=Homo sapiens GN=OLFML3 PE=2 SV=1	2	46
Q9NRL3-3	Isoform 3 of Striatin-4 OS=Homo sapiens GN=STRN4	16	81.2	0.97	1.006	0.933	0.873	0.818
Q9NRK6	ATP-binding cassette sub-family B member 10, mitochondrial OS=Homo sapiens GN=ABCB10 PE=1 SV=2	4	79.1	0.94	1.034	0.874	0.814	0.767
Q9NRG7	Epimerase family protein SDR39U1 OS=Homo sapiens GN=SDR39U1 PE=1 SV=2	10	34.7	0.941	1.163	0.856	0.842	0.791
Q9NRG1	Phosphoribosyltransferase domain-containing protein 1 OS=Homo sapiens GN=PRTFDC1 PE=1 SV=1	2	25.7	0.885	1.011	0.884	0.885	0.826
Q9NRD1	F-box only protein 6 OS=Homo sapiens GN=FBXO6 PE=1 SV=1	6	33.9	0.901	0.934	1.029	0.744	0.726
Q9NRA8-3	Isoform 3 of Eukaryotic translation initiation factor 4E transporter OS=Homo sapiens GN=EIF4ENIF1	2	108.3	0.714	0.826	0.779	0.879	0.72
Q9NRA0-5	Isoform 5 of Sphingosine kinase 2 OS=Homo sapiens GN=SPHK2	2	80.2	0.915	1.012	1.017	0.994	0.971
Q9NR46-2	Isoform 2 of Endophilin-B2 OS=Homo sapiens GN=SH3GLB2	74	44.7	1.099	1.167	1.355	1.355	1.217
Q9NR45	Sialic acid synthase OS=Homo sapiens GN=NANS PE=1 SV=2	29	40.3	0.858	0.89	1.01	1.011	0.893
Q9NR34	Mannosyl-oligosaccharide 1,2-alpha-mannosidase IC OS=Homo sapiens GN=MAN1C1 PE=1 SV=1	2	70.9	1.334	1.753	1.728	1.75	1.096
Q9NR31	GTP-binding protein SAR1a OS=Homo sapiens GN=SAR1A PE=1 SV=1	14	22.4	0.827	0.865	0.932	1.037	0.772
Q9NR22	Protein arginine N-methyltransferase 8 OS=Homo sapiens GN=PRMT8 PE=1 SV=2	2	45.3
Q9NR19-2	Isoform 2 of Acetyl-coenzyme A synthetase, cytoplasmic OS=Homo sapiens GN=ACSS2	2	80	1.04	0.947	0.9	0.874	0.911
Q9NR12	PDZ and LIM domain protein 7 OS=Homo sapiens GN=PDLIM7 PE=1 SV=1	2	49.8	0.87	0.99	1.082	1.059	0.939
Q9NR09	Baculoviral IAP repeat-containing protein 6 OS=Homo sapiens GN=BIRC6 PE=1 SV=2	2	529.9
Q9NQZ5	StAR-related lipid transfer protein 7, mitochondrial OS=Homo sapiens GN=STARD7 PE=1 SV=2	2	43.1	1.136	1.179	1.014	0.957	1.07
Q9NQX3-2	Isoform 2 of Gephyrin OS=Homo sapiens GN=GPHN	63	83.4	0.941	0.969	0.948	0.963	0.911
Q9NQW7-3	Isoform 3 of Xaa-Pro aminopeptidase 1 OS=Homo sapiens GN=XPNPEP1	33	74.8	0.975	0.916	1.018	1.024	1.006
Q9NQW6	Anillin OS=Homo sapiens GN=ANLN PE=1 SV=2	37	124.1	1.227	1.251	1.193	1.719	1.927
Q9NQT8	Kinesin-like protein KIF13B OS=Homo sapiens GN=KIF13B PE=1 SV=2	12	202.7	1.152	1.036	1.218	1.32	1.477
Q9NQS1	Cell death regulator Aven OS=Homo sapiens GN=AVEN PE=1 SV=1	2	38.5	0.85	0.762	0.801	0.93	1.031
Q9NQR7	Coiled-coil domain-containing protein 177 OS=Homo sapiens GN=CCDC177 PE=2 SV=3	20	79.7	1.044	1.222	1.012	0.938	0.852
Q9NQP4	Prefoldin subunit 4 OS=Homo sapiens GN=PFDN4 PE=1 SV=1	12	15.3	1.248	1.087	1.204	1.104	1.18
Q9NQL2	Ras-related GTP-binding protein D OS=Homo sapiens GN=RRAGD PE=1 SV=1	4	45.6	0.873	0.969	0.866	0.912	0.756
Q9NQH7	Probable Xaa-Pro aminopeptidase 3 OS=Homo sapiens GN=XPNPEP3 PE=1 SV=1	14	57	0.811	0.86	1.837	0.883	0.903
Q9NQG5	Regulation of nuclear pre-mRNA domain-containing protein 1B OS=Homo sapiens GN=RPRD1B PE=1 SV=1	8	36.9	0.97	1.065	1.056	0.982	1.045
Q9NQE9	Histidine triad nucleotide-binding protein 3 OS=Homo sapiens GN=HINT3 PE=1 SV=1	15	20.3	1.094	1.153	1.112	1.087	1.227
Q9NQC7	Ubiquitin carboxyl-terminal hydrolase CYLD OS=Homo sapiens GN=CYLD PE=1 SV=1	6	107.2	0.89	0.945	0.893	0.748	0.653
Q9NQC3	Reticulon-4 OS=Homo sapiens GN=RTN4 PE=1 SV=2	167	129.9	1.08	1.023	0.941	0.832	0.981
Q9NQ89	Protein C12orf4 OS=Homo sapiens GN=C12orf4 PE=2 SV=1	6	63.8	0.98	0.876	0.906	0.857	0.887
Q9NQ88	Fructose-2,6-bisphosphatase TIGAR OS=Homo sapiens GN=TIGAR PE=1 SV=1	6	30	0.745	0.829	0.754	0.862	0.931
Q9NQ86	E3 ubiquitin-protein ligase TRIM36 OS=Homo sapiens GN=TRIM36 PE=1 SV=2	8	83	0.727	0.782	0.679	0.635	0.495
Q9NQ79	Cartilage acidic protein 1 OS=Homo sapiens GN=CRTAC1 PE=1 SV=2	33	71.4	1.242	1.431	1.533	1.168	1.315
Q9NQ66	1-phosphatidylinositol 4,5-bisphosphate phosphodiesterase beta-1 OS=Homo sapiens GN=PLCB1 PE=1 SV=1	160	138.5	0.85	1.021	0.858	0.823	0.861
Q9NQ50	39S ribosomal protein L40, mitochondrial OS=Homo sapiens GN=MRPL40 PE=1 SV=1	8	24.5	0.893	1.059	0.949	0.674	0.8
Q9NQ48	Leucine zipper transcription factor-like protein 1 OS=Homo sapiens GN=LZTFL1 PE=1 SV=1	38	34.6	0.963	0.879	0.951	0.931	0.841
Q9NQ38-3	Isoform long of Serine protease inhibitor Kazal-type 5 OS=Homo sapiens GN=SPINK5	3	124	1.3	1.231	1.072	1.272	1.959
Q9NQ11	Probable cation-transporting ATPase 13A2 OS=Homo sapiens GN=ATP13A2 PE=1 SV=2	6	128.7	0.918	0.97	0.914	0.851	0.816
Q9NPQ8	Synembryn-A OS=Homo sapiens GN=RIC8A PE=1 SV=3	10	59.7	1.09	1.008	1.164	1.151	1.104
Q9NPL8	Complex I assembly factor TIMMDC1, mitochondrial OS=Homo sapiens GN=TIMMDC1 PE=1 SV=2	2	32.2	0.998	1.199	0.963	0.704	0.837
Q9NPJ3	Acyl-coenzyme A thioesterase 13 OS=Homo sapiens GN=ACOT13 PE=1 SV=1	24	15	1.055	1.003	0.963	0.914	1.028
Q9NPH2	Inositol-3-phosphate synthase 1 OS=Homo sapiens GN=ISYNA1 PE=1 SV=1	8	61	0.97	0.896	1.072	1.149	0.986
Q9NPH0	Lysophosphatidic acid phosphatase type 6 OS=Homo sapiens GN=ACP6 PE=1 SV=2	2	48.8	0.866	0.886	0.831	0.637	0.706
Q9NPG1	Frizzled-3 OS=Homo sapiens GN=FZD3 PE=1 SV=1	2	76.2	1.004	0.993	0.927	0.799	0.754
Q9NPF4	Probable tRNA N6-adenosine threonylcarbamoyltransferase OS=Homo sapiens GN=OSGEP PE=1 SV=1	2	36.4	1.044	1.098	1.021	0.976	0.925
Q9NPE3	H/ACA ribonucleoprotein complex subunit 3 OS=Homo sapiens GN=NOP10 PE=1 SV=1	2	7.7	1.189	1.06	1.047	0.977	1.124
Q9NPD3	Exosome complex component RRP41 OS=Homo sapiens GN=EXOSC4 PE=1 SV=3	2	26.4
Q9NPB8	Glycerophosphocholine phosphodiesterase GPCPD1 OS=Homo sapiens GN=GPCPD1 PE=1 SV=2	4	76	0.838	1.104	0.862	0.879	1.41
Q9NP90	Ras-related protein Rab-9B OS=Homo sapiens GN=RAB9B PE=1 SV=1	8	22.7	0.934	0.92	0.945	1.041	0.931
Q9NP79	Vacuolar protein sorting-associated protein VTA1 homolog OS=Homo sapiens GN=VTA1 PE=1 SV=1	16	33.9	0.942	0.907	0.898	0.807	0.799
Q9NP77	RNA polymerase II subunit A C-terminal domain phosphatase SSU72 OS=Homo sapiens GN=SSU72 PE=1 SV=1	2	22.6	1.019	0.982	0.95	0.928	0.855
Q9NP72	Ras-related protein Rab-18 OS=Homo sapiens GN=RAB18 PE=1 SV=1	36	23	0.947	0.994	0.901	1.039	1.021
Q9NP61	ADP-ribosylation factor GTPase-activating protein 3 OS=Homo sapiens GN=ARFGAP3 PE=1 SV=1	2	56.9	1.122	0.993	0.959	0.988	0.98
Q9NP58	ATP-binding cassette sub-family B member 6, mitochondrial OS=Homo sapiens GN=ABCB6 PE=1 SV=1	2	93.8
Q9NNY7	Cyclooxygenase-2 (Fragment) OS=Homo sapiens GN=PTGS2 PE=4 SV=1	1	2.4	0.864	1.193	0.926	1.328	1.56
Q9HDC9	Adipocyte plasma membrane-associated protein OS=Homo sapiens GN=APMAP PE=1 SV=2	77	46.5	1.145	1.138	1.112	0.996	1.02
Q9HDC5	Junctophilin-1 OS=Homo sapiens GN=JPH1 PE=1 SV=2	12	71.6	1.074	1.054	1.089	0.889	0.866
Q9HD45	Transmembrane 9 superfamily member 3 OS=Homo sapiens GN=TM9SF3 PE=1 SV=2	4	67.8	0.932	1.068	1.045	1.223	1.222
Q9HD42	Charged multivesicular body protein 1a OS=Homo sapiens GN=CHMP1A PE=1 SV=1	12	21.7	0.999	0.922	0.942	0.834	0.874
Q9HD33	39S ribosomal protein L47, mitochondrial OS=Homo sapiens GN=MRPL47 PE=1 SV=2	4	29.4	0.622	0.804	0.659	0.559	0.567
Q9HD26	Golgi-associated PDZ and coiled-coil motif-containing protein OS=Homo sapiens GN=GOPC PE=1 SV=1	8	50.5	0.891	0.993	0.847	0.733	0.659
Q9HD20	Manganese-transporting ATPase 13A1 OS=Homo sapiens GN=ATP13A1 PE=1 SV=2	20	132.9	0.849	0.906	0.847	0.778	0.719
Q9HCU5	Prolactin regulatory element-binding protein OS=Homo sapiens GN=PREB PE=1 SV=2	12	45.4	2.042	1.538	1.483	1.013	1.422
Q9HCU4	Cadherin EGF LAG seven-pass G-type receptor 2 OS=Homo sapiens GN=CELSR2 PE=1 SV=1	6	317.3	1.112	1.097	1.161	1.136	1.215
Q9HCP6	Protein-cysteine N-palmitoyltransferase HHAT-like protein OS=Homo sapiens GN=HHATL PE=2 SV=1	4	56.7	1.333	1.177	1.169	1.273	1.127
Q9HCN4-5	Isoform 5 of GPN-loop GTPase 1 OS=Homo sapiens GN=GPN1	2	43.3	1.222	1.265	1.343	1.064	1.123
Q9HCM4	Band 4.1-like protein 5 OS=Homo sapiens GN=EPB41L5 PE=1 SV=3	2	81.8
Q9HCM3	UPF0606 protein KIAA1549 OS=Homo sapiens GN=KIAA1549 PE=1 SV=4	6	210.6	1.656	1.138	1.358	0.899	1.027
Q9HCM2	Plexin-A4 OS=Homo sapiens GN=PLXNA4 PE=1 SV=4	80	212.3	0.883	1.004	0.944	0.896	0.825
Q9HCH3	Copine-5 OS=Homo sapiens GN=CPNE5 PE=1 SV=2	79	65.7	1.127	1.058	1.052	0.942	0.91
Q9HCF6-11	Isoform 11 of Transient receptor potential cation channel subfamily M member 3 OS=Homo sapiens GN=TRPM3	2	197.6
Q9HCE9	Anoctamin-8 OS=Homo sapiens GN=ANO8 PE=1 SV=3	27	135.9	1.08	1.284	1.196	1.091	1.213
Q9HCE6	Rho guanine nucleotide exchange factor 10-like protein OS=Homo sapiens GN=ARHGEF10L PE=1 SV=3	2	140.3	1.033	1.075	1.026	1.08	1.131
Q9HCE5	N6-adenosine-methyltransferase subunit METTL14 OS=Homo sapiens GN=METTL14 PE=1 SV=2	2	52.1	0.836	0.879	0.908	0.82	0.835
Q9HCD6-2	Isoform 2 of Protein TANC2 OS=Homo sapiens GN=TANC2	20	220.6	0.958	0.97	0.921	0.83	0.781
Q9HCD5	Nuclear receptor coactivator 5 OS=Homo sapiens GN=NCOA5 PE=1 SV=2	3	65.5	0.552	0.583	0.647	0.597	0.51
Q9HCC9	Lateral signaling target protein 2 homolog OS=Homo sapiens GN=ZFYVE28 PE=1 SV=3	2	96.4	0.771	0.829	0.832	0.608	0.578
Q9HCC0	Methylcrotonoyl-CoA carboxylase beta chain, mitochondrial OS=Homo sapiens GN=MCCC2 PE=1 SV=1	20	61.3	1.072	1.098	1.004	1.012	0.985
Q9HCB6	Spondin-1 OS=Homo sapiens GN=SPON1 PE=1 SV=2	8	90.9	0.938	0.988	0.988	1.326	1.313
Q9HC56	Protocadherin-9 OS=Homo sapiens GN=PCDH9 PE=1 SV=2	61	136	1.022	1.055	1.005	0.961	0.937
Q9HC38-2	Isoform 2 of Glyoxalase domain-containing protein 4 OS=Homo sapiens GN=GLOD4	80	33.2	0.978	0.857	1.014	1.08	0.962
Q9HC36	rRNA methyltransferase 3, mitochondrial OS=Homo sapiens GN=MRM3 PE=1 SV=2	4	47	0.814	0.881	1.008	0.745	0.775
Q9HC06	Cd002 protein OS=Homo sapiens PE=2 SV=1	2	43.5
Q9HC03	Dolichyl-phosphate beta-glucosyltransferase OS=Homo sapiens PE=2 SV=1	2	36.9	1.043	1.065	1.045	0.972	0.978
Q9HBR0	Putative sodium-coupled neutral amino acid transporter 10 OS=Homo sapiens GN=SLC38A10 PE=1 SV=2	4	119.7	0.953	1.043	0.912	0.963	0.961
Q9HBL8	NmrA-like family domain-containing protein 1 OS=Homo sapiens GN=NMRAL1 PE=1 SV=1	5	33.3	0.988	1.013	0.925	0.981	0.85
Q9HBI1-2	Isoform 2 of Beta-parvin OS=Homo sapiens GN=PARVB	2	45.2
Q9HBB3	60S ribosomal protein L6 OS=Homo sapiens PE=2 SV=1	31	32.9	0.958	1.098	0.924	0.934	0.943
Q9HB90	Ras-related GTP-binding protein C OS=Homo sapiens GN=RRAGC PE=1 SV=1	4	44.2	0.754	0.816	0.859	0.795	0.705
Q9HB66	Alternative protein MKKS OS=Homo sapiens GN=MKKS PE=1 SV=1	2	7.3	0.675	0.986	0.85	0.928	0.967
Q9HB40	Retinoid-inducible serine carboxypeptidase OS=Homo sapiens GN=SCPEP1 PE=1 SV=1	2	50.8	0.815	0.818	0.853	1.047	0.811
Q9HAV7	GrpE protein homolog 1, mitochondrial OS=Homo sapiens GN=GRPEL1 PE=1 SV=2	20	24.3	0.814	0.874	0.962	0.819	0.788
Q9HAV0	Guanine nucleotide-binding protein subunit beta-4 OS=Homo sapiens GN=GNB4 PE=1 SV=3	79	37.5	1.13	1.119	1.423	1.724	1.785
Q9HAU5	Regulator of nonsense transcripts 2 OS=Homo sapiens GN=UPF2 PE=1 SV=1	7	147.7	1.009	0.992	0.916	0.883	0.884
Q9HAU0-6	Isoform 6 of Pleckstrin homology domain-containing family A member 5 OS=Homo sapiens GN=PLEKHA5	10	146.8	0.763	0.886	0.814	0.872	0.73
Q9HAT2	Sialate O-acetylesterase OS=Homo sapiens GN=SIAE PE=1 SV=1	6	58.3	0.646	0.867	0.771	0.937	0.819
Q9HAP6	Protein lin-7 homolog B OS=Homo sapiens GN=LIN7B PE=1 SV=1	15	22.9	0.845	0.893	0.847	0.734	0.707
Q9HAF1-3	Isoform 3 of Chromatin modification-related protein MEAF6 OS=Homo sapiens GN=MEAF6	2	22.7	0.979	1.032	1.034	1.176	1.087
Q9HAB8	Phosphopantothenate--cysteine ligase OS=Homo sapiens GN=PPCS PE=1 SV=2	4	34	0.842	0.966	0.916	1.013	0.811
Q9HA77	Probable cysteine--tRNA ligase, mitochondrial OS=Homo sapiens GN=CARS2 PE=1 SV=1	2	62.2	0.871	1.037	0.79	0.869	0.725
Q9HA65	TBC1 domain family member 17 OS=Homo sapiens GN=TBC1D17 PE=1 SV=2	14	72.7	0.672	0.845	0.704	0.843	0.765
Q9HA47-4	Isoform 4 of Uridine-cytidine kinase 1 OS=Homo sapiens GN=UCK1	2	32.3	0.868	1.029	0.915	0.848	0.753
Q9H9T3	Elongator complex protein 3 OS=Homo sapiens GN=ELP3 PE=1 SV=2	8	62.2	0.725	0.898	0.762	0.767	0.79
Q9H9S3	Protein transport protein Sec61 subunit alpha isoform 2 OS=Homo sapiens GN=SEC61A2 PE=2 SV=3	4	52.2	0.81	0.904	0.883	0.94	0.756
Q9H9H5	MAP6 domain-containing protein 1 OS=Homo sapiens GN=MAP6D1 PE=1 SV=1	20	21	1.048	1.079	1.139	1.055	1.292
Q9H9B4	Sideroflexin-1 OS=Homo sapiens GN=SFXN1 PE=1 SV=4	89	35.6	1.103	1.223	1.027	0.887	0.943
Q9H9A6	Leucine-rich repeat-containing protein 40 OS=Homo sapiens GN=LRRC40 PE=1 SV=1	26	68.2	0.862	0.917	0.831	0.805	0.742
Q9H993	Protein-glutamate O-methyltransferase OS=Homo sapiens GN=ARMT1 PE=1 SV=1	10	51.1	0.91	0.824	0.962	0.886	0.886
Q9H977	WD repeat-containing protein 54 OS=Homo sapiens GN=WDR54 PE=1 SV=1	2	35.9
Q9H936	Mitochondrial glutamate carrier 1 OS=Homo sapiens GN=SLC25A22 PE=1 SV=1	73	34.4	1.005	1.016	1.185	1.139	1.019
Q9H910-3	Isoform 3 of Hematological and neurological expressed 1-like protein OS=Homo sapiens GN=HN1L	2	23	0.899	0.847	0.798	1.414	1.26
Q9H903	Probable bifunctional methylenetetrahydrofolate dehydrogenase/cyclohydrolase 2 OS=Homo sapiens GN=MTHFD2L PE=2 SV=3	4	37.3	1.021	1.115	1.018	0.993	0.953
Q9H8Y8-3	Isoform 3 of Golgi reassembly-stacking protein 2 OS=Homo sapiens GN=GORASP2	6	48.6	0.824	0.947	0.998	1.274	1.019
Q9H8M7	Ubiquitin carboxyl-terminal hydrolase FAM188A OS=Homo sapiens GN=FAM188A PE=1 SV=1	2	49.7
Q9H8M5	Metal transporter CNNM2 OS=Homo sapiens GN=CNNM2 PE=1 SV=2	4	96.6	0.46	0.579	0.614	0.645	0.804
Q9H8M1	Coenzyme Q-binding protein COQ10 homolog B, mitochondrial OS=Homo sapiens GN=COQ10B PE=2 SV=1	2	27.1	0.672	0.65	0.722	0.533	0.575
Q9H8L6	Multimerin-2 OS=Homo sapiens GN=MMRN2 PE=1 SV=2	1	104.3	1.02	1.01	1.224	0.989	0.943
Q9H8J5	MANSC domain-containing protein 1 OS=Homo sapiens GN=MANSC1 PE=2 SV=1	2	46.8	0.88	1.534	0.848	0.911	0.938
Q9H871	Protein RMD5 homolog A OS=Homo sapiens GN=RMND5A PE=1 SV=1	4	44	0.42	0.596	0.538	0.705	0.418
Q9H845	Acyl-CoA dehydrogenase family member 9, mitochondrial OS=Homo sapiens GN=ACAD9 PE=1 SV=1	23	68.7	0.725	0.923	0.819	0.895	0.676
Q9H832	Ubiquitin-conjugating enzyme E2 Z OS=Homo sapiens GN=UBE2Z PE=1 SV=2	4	38.2	0.768	0.783	0.85	1.045	0.974
Q9H7Z7	Prostaglandin E synthase 2 OS=Homo sapiens GN=PTGES2 PE=1 SV=1	42	41.9	0.887	0.987	0.857	0.812	0.836
Q9H7Z6-2	Isoform 2 of Histone acetyltransferase KAT8 OS=Homo sapiens GN=KAT8	4	53.1	1.15	0.978	0.979	0.694	0.715
Q9H7P6	Multivesicular body subunit 12B OS=Homo sapiens GN=MVB12B PE=1 SV=2	2	35.6	0.841	0.864	0.769	0.988	0.969
Q9H7E2-3	Isoform 3 of Tudor domain-containing protein 3 OS=Homo sapiens GN=TDRD3	3	83.1	0.945	0.777	1.16	1.075	0.416
Q9H7D7	WD repeat-containing protein 26 OS=Homo sapiens GN=WDR26 PE=1 SV=3	8	72.1	0.953	1.003	0.972	0.902	0.841
Q9H7D0	Dedicator of cytokinesis protein 5 OS=Homo sapiens GN=DOCK5 PE=1 SV=3	19	215.2	1.112	1.03	1.011	1.007	1.201
Q9H799	Protein JBTS17 OS=Homo sapiens GN=C5orf42 PE=1 SV=4	1	361.5	0.573	0.654	0.912	1.529	0.995
Q9H790	Exonuclease V OS=Homo sapiens GN=EXO5 PE=1 SV=1	1	41.8		100	100	100	100
Q9H706	GRB2-associated and regulator of MAPK protein 1 OS=Homo sapiens GN=GAREM1 PE=1 SV=2	2	97.1
Q9H6Z4	Ran-binding protein 3 OS=Homo sapiens GN=RANBP3 PE=1 SV=1	2	60.2	1.024	1.085	1.003	0.916	1.055
Q9H6X2	Anthrax toxin receptor 1 OS=Homo sapiens GN=ANTXR1 PE=1 SV=2	4	62.7	1.648	1.364	1.296	1.085	1.28
Q9H6U6	Breast carcinoma-amplified sequence 3 OS=Homo sapiens GN=BCAS3 PE=1 SV=3	27	101.2	0.968	0.951	0.944	0.881	0.833
Q9H6T3	RNA polymerase II-associated protein 3 OS=Homo sapiens GN=RPAP3 PE=1 SV=2	5	75.7	1.115	1.243	1.044	0.884	0.905
Q9H6S1	5-azacytidine-induced protein 2 OS=Homo sapiens GN=AZI2 PE=1 SV=1	2	44.9
Q9H6R3	Acyl-CoA synthetase short-chain family member 3, mitochondrial OS=Homo sapiens GN=ACSS3 PE=1 SV=1	13	74.7	1.042	0.955	1.053	0.924	1.006
Q9H6Q4	Cytosolic Fe-S cluster assembly factor NARFL OS=Homo sapiens GN=NARFL PE=1 SV=1	2	53	1.211	1.163	1.35	1.209	0.789
Q9H6L5	Reticulophagy receptor FAM134B OS=Homo sapiens GN=FAM134B PE=1 SV=1	6	54.6	1.072	0.97	0.833	0.671	0.88
Q9H6L2	Transmembrane protein 231 OS=Homo sapiens GN=TMEM231 PE=1 SV=1	1	36	0.998	1.116	0.963	0.872	0.977
Q9H6K5	Proline-rich protein 36 OS=Homo sapiens GN=PRR36 PE=1 SV=2	29	132.7	1.133	0.912	0.934	0.784	0.727
Q9H6K4	Optic atrophy 3 protein OS=Homo sapiens GN=OPA3 PE=1 SV=1	6	20	0.842	0.978	0.825	0.721	0.669
Q9H6F2	Trimeric intracellular cation channel type A OS=Homo sapiens GN=TMEM38A PE=1 SV=1	2	33.2	0.829	1.04	0.758	0.566	0.525
Q9H5Q4	Dimethyladenosine transferase 2, mitochondrial OS=Homo sapiens GN=TFB2M PE=1 SV=1	2	45.3
Q9H598	Vesicular inhibitory amino acid transporter OS=Homo sapiens GN=SLC32A1 PE=2 SV=2	16	57.4	0.887	1.203	0.899	0.923	0.858
Q9H553	Alpha-1,3/1,6-mannosyltransferase ALG2 OS=Homo sapiens GN=ALG2 PE=1 SV=1	2	47.1	1.22	1.044	1.334	1.025	1.336
Q9H4X1	Regulator of cell cycle RGCC OS=Homo sapiens GN=RGCC PE=1 SV=1	2	14.6	1.1	0.906	0.969	1.501	1.827
Q9H4G0-4	Isoform 4 of Band 4.1-like protein 1 OS=Homo sapiens GN=EPB41L1	177	78.8	0.991	0.964	1.101	1.302	1.212
Q9H4F8-2	Isoform 2 of SPARC-related modular calcium-binding protein 1 OS=Homo sapiens GN=SMOC1	13	48.2	1.164	1.2	1.25	1.424	1.259
Q9H4D0	Calsyntenin-2 OS=Homo sapiens GN=CLSTN2 PE=1 SV=2	4	106.9	0.86	0.936	0.947	1.038	0.951
Q9H4B0	Probable tRNA N6-adenosine threonylcarbamoyltransferase, mitochondrial OS=Homo sapiens GN=OSGEPL1 PE=2 SV=2	2	45.1	0.909	1.026	1.22	1.018	1.032
Q9H4A6	Golgi phosphoprotein 3 OS=Homo sapiens GN=GOLPH3 PE=1 SV=1	6	33.8	0.816	0.891	0.801	0.847	0.97
Q9H4A3-7	Isoform 6 of Serine/threonine-protein kinase WNK1 OS=Homo sapiens GN=WNK1	39	299.5	1.072	1.005	1.044	0.979	1.146
Q9H492-2	Isoform 2 of Microtubule-associated proteins 1A/1B light chain 3A OS=Homo sapiens GN=MAP1LC3A	22	14.5	1.184	1.215	1.553	1.229	1.389
Q9H490	Phosphatidylinositol glycan anchor biosynthesis class U protein OS=Homo sapiens GN=PIGU PE=1 SV=3	2	50	0.777	0.903	0.804	0.731	0.8
Q9H479	Fructosamine-3-kinase OS=Homo sapiens GN=FN3K PE=1 SV=1	44	35.1	1.011	1	1.016	1.131	1.109
Q9H469	F-box/LRR-repeat protein 15 OS=Homo sapiens GN=FBXL15 PE=1 SV=2	2	33	1.014	0.979	0.992	0.993	1.008
Q9H467	CUE domain-containing protein 2 OS=Homo sapiens GN=CUEDC2 PE=1 SV=1	6	32	1.016	0.908	0.972	0.876	0.924
Q9H444	Charged multivesicular body protein 4b OS=Homo sapiens GN=CHMP4B PE=1 SV=1	43	24.9	1.027	1	0.985	0.915	0.922
Q9H400	Lck-interacting transmembrane adapter 1 OS=Homo sapiens GN=LIME1 PE=1 SV=1	2	31.3
Q9H3Z4	DnaJ homolog subfamily C member 5 OS=Homo sapiens GN=DNAJC5 PE=1 SV=1	76	22.1	0.895	1.055	0.816	0.772	0.604
Q9H3U1	Protein unc-45 homolog A OS=Homo sapiens GN=UNC45A PE=1 SV=1	6	103	0.77	0.797	0.745	0.832	0.784
Q9H3S7	Tyrosine-protein phosphatase non-receptor type 23 OS=Homo sapiens GN=PTPN23 PE=1 SV=1	41	178.9	0.881	0.916	0.867	0.762	0.735
Q9H3S4	Thiamin pyrophosphokinase 1 OS=Homo sapiens GN=TPK1 PE=1 SV=1	3	27.2	1.042	0.944	0.973	0.997	1.006
Q9H3S1	Semaphorin-4A OS=Homo sapiens GN=SEMA4A PE=1 SV=2	2	83.5	1.544	1.185	1.083	0.919	1.147
Q9H3P7	Golgi resident protein GCP60 OS=Homo sapiens GN=ACBD3 PE=1 SV=4	8	60.6	0.902	1.091	0.906	0.924	0.978
Q9H3N1	Thioredoxin-related transmembrane protein 1 OS=Homo sapiens GN=TMX1 PE=1 SV=1	16	31.8	1.079	1.082	1.013	1.015	1.081
Q9H3K6	BolA-like protein 2 OS=Homo sapiens GN=BOLA2 PE=1 SV=1	3	10.1	1.039	0.961	1.023	1.137	1.287
Q9H3H9	Transcription elongation factor A protein-like 2 OS=Homo sapiens GN=TCEAL2 PE=2 SV=1	6	25.8	1.108	1.177	1.138	0.95	0.99
Q9H3H3-2	Isoform 2 of UPF0696 protein C11orf68 OS=Homo sapiens GN=C11orf68	10	31.4	1.018	1.002	0.957	0.937	0.999
Q9H330	Transmembrane protein 245 OS=Homo sapiens GN=TMEM245 PE=1 SV=2	6	100.9	0.772	0.88	0.882	1.024	0.648
Q9H329	Band 4.1-like protein 4B OS=Homo sapiens GN=EPB41L4B PE=2 SV=2	2	99.7	1.051	1.028	1.035	1.084	1.124
Q9H313-3	Isoform 3 of Protein tweety homolog 1 OS=Homo sapiens GN=TTYH1	12	49.7	0.958	0.885	0.902	0.809	0.796
Q9H305	Cell death-inducing p53-target protein 1 OS=Homo sapiens GN=CDIP1 PE=1 SV=1	6	21.9	0.775	0.848	0.919	1.143	0.862
Q9H300	Presenilins-associated rhomboid-like protein, mitochondrial OS=Homo sapiens GN=PARL PE=1 SV=2	4	42.2	0.585	0.798	0.661	0.519	0.407
Q9H2X9	Solute carrier family 12 member 5 OS=Homo sapiens GN=SLC12A5 PE=1 SV=3	80	126.1	0.738	0.961	0.743	0.727	0.632
Q9H2X0	Chordin OS=Homo sapiens GN=CHRD PE=1 SV=2	4	102	1.116	1.057	1.187	1.155	1.251
Q9H2W6	39S ribosomal protein L46, mitochondrial OS=Homo sapiens GN=MRPL46 PE=1 SV=1	10	31.7	0.809	1.016	0.916	0.723	0.697
Q9H2U2-2	Isoform 2 of Inorganic pyrophosphatase 2, mitochondrial OS=Homo sapiens GN=PPA2	34	39.6	0.884	1.024	0.972	1.071	1.056
Q9H2U1	ATP-dependent RNA helicase DHX36 OS=Homo sapiens GN=DHX36 PE=1 SV=2	8	114.7	0.784	0.989	0.81	0.798	0.781
Q9H2P9-5	Isoform 5 of Diphthine methyl ester synthase OS=Homo sapiens GN=DPH5	2	33	0.845	0.697	0.979	1.154	1.071
Q9H2M9	Rab3 GTPase-activating protein non-catalytic subunit OS=Homo sapiens GN=RAB3GAP2 PE=1 SV=1	40	155.9	1.098	1	1.029	0.829	0.837
Q9H2J7	Sodium-dependent neutral amino acid transporter B(0)AT2 OS=Homo sapiens GN=SLC6A15 PE=1 SV=1	6	81.8	0.823	1.113	1.389	1.326	1.62
Q9H2J4	Phosducin-like protein 3 OS=Homo sapiens GN=PDCL3 PE=1 SV=1	6	27.6	1.039	1.061	0.993	0.932	1.149
Q9H2G2-2	Isoform 2 of STE20-like serine/threonine-protein kinase OS=Homo sapiens GN=SLK	57	138.9	0.976	0.843	0.912	0.762	0.776
Q9H269	Vacuolar protein sorting-associated protein 16 homolog OS=Homo sapiens GN=VPS16 PE=1 SV=2	23	94.6	0.832	0.947	0.834	0.862	0.826
Q9H228	Sphingosine 1-phosphate receptor 5 OS=Homo sapiens GN=S1PR5 PE=2 SV=1	8	41.7	1.036	0.798	1.324	1.413	1.602
Q9H1V8	Sodium-dependent neutral amino acid transporter SLC6A17 OS=Homo sapiens GN=SLC6A17 PE=1 SV=3	46	80.9	0.913	1.075	0.897	0.861	0.802
Q9H1U4	Multiple epidermal growth factor-like domains protein 9 OS=Homo sapiens GN=MEGF9 PE=2 SV=3	8	62.9	0.752	1.094	0.988	1.066	0.952
Q9H1K1	Iron-sulfur cluster assembly enzyme ISCU, mitochondrial OS=Homo sapiens GN=ISCU PE=1 SV=2	26	18	0.973	0.974	0.903	0.951	0.938
Q9H1E5	Thioredoxin-related transmembrane protein 4 OS=Homo sapiens GN=TMX4 PE=1 SV=1	32	38.9	0.85	1.007	0.842	0.826	0.796
Q9H1E3	Nuclear ubiquitous casein and cyclin-dependent kinase substrate 1 OS=Homo sapiens GN=NUCKS1 PE=1 SV=1	84	27.3	0.805	0.972	1.036	1.187	0.919
Q9H1C7	Cysteine-rich and transmembrane domain-containing protein 1 OS=Homo sapiens GN=CYSTM1 PE=1 SV=1	4	10.6	0.811	0.807	0.737	0.889	0.815
Q9H1B7	Interferon regulatory factor 2-binding protein-like OS=Homo sapiens GN=IRF2BPL PE=1 SV=1	4	82.6	0.869	1.119	1.011	0.939	0.665
Q9H1A4	Anaphase-promoting complex subunit 1 OS=Homo sapiens GN=ANAPC1 PE=1 SV=1	2	216.4	0.899	0.73	0.778	1.767	0.568
Q9H159	Cadherin-19 OS=Homo sapiens GN=CDH19 PE=2 SV=1	2	86.9	1.308	1.12	1.151	1.02	1.117
Q9H115	Beta-soluble NSF attachment protein OS=Homo sapiens GN=NAPB PE=1 SV=2	183	33.5	0.868	0.96	0.94	0.892	0.814
Q9H0X9	Oxysterol-binding protein-related protein 5 OS=Homo sapiens GN=OSBPL5 PE=1 SV=1	4	98.6	1.176	1.443	1.597	1.312	1.182
Q9H0X4	Protein FAM234A OS=Homo sapiens GN=FAM234A PE=1 SV=1	4	59.6	0.97	1.003	0.98	1.164	1.025
Q9H0U6	39S ribosomal protein L18, mitochondrial OS=Homo sapiens GN=MRPL18 PE=1 SV=1	2	20.6	1.355	1.433	1.318	0.935	1.155
Q9H0U4	Ras-related protein Rab-1B OS=Homo sapiens GN=RAB1B PE=1 SV=1	194	22.2	1.078	1.095	1.072	0.911	0.954
Q9H0R8-2	Isoform 2 of Gamma-aminobutyric acid receptor-associated protein-like 1 OS=Homo sapiens GN=GABARAPL1	14	17	1.085	1.214	1.105	0.92	0.985
Q9H0R4	Haloacid dehalogenase-like hydrolase domain-containing protein 2 OS=Homo sapiens GN=HDHD2 PE=1 SV=1	22	28.5	0.798	0.871	0.885	0.985	0.936
Q9H0Q0	Protein FAM49A OS=Homo sapiens GN=FAM49A PE=2 SV=1	29	37.3	0.801	0.739	0.824	0.712	0.677
Q9H0P0	Cytosolic 5'-nucleotidase 3A OS=Homo sapiens GN=NT5C3A PE=1 SV=3	6	37.9	1.045	1.037	0.912	0.807	0.915
Q9H0L4	Cleavage stimulation factor subunit 2 tau variant OS=Homo sapiens GN=CSTF2T PE=1 SV=1	4	64.4	1.046	1.584	1.442	1.388	1.732
Q9H0F7	ADP-ribosylation factor-like protein 6 OS=Homo sapiens GN=ARL6 PE=1 SV=1	10	21.1	0.622	0.734	0.647	0.653	0.629
Q9H0B6	Kinesin light chain 2 OS=Homo sapiens GN=KLC2 PE=1 SV=1	50	68.9	0.936	1	0.94	0.871	0.863
Q9H0A0	RNA cytidine acetyltransferase OS=Homo sapiens GN=NAT10 PE=1 SV=2	2	115.7	1.28	1.162	1.128	0.99	1.353
Q9H098-2	Isoform 2 of Protein FAM107B OS=Homo sapiens GN=FAM107B	12	34.7	1.213	1.119	1.231	1.216	1.728
Q9H078-2	Isoform 2 of Caseinolytic peptidase B protein homolog OS=Homo sapiens GN=CLPB	26	75.4	1.009	1.081	1.013	0.972	0.98
Q9H074	Polyadenylate-binding protein-interacting protein 1 OS=Homo sapiens GN=PAIP1 PE=1 SV=1	10	53.5	0.991	1.005	0.978	0.902	0.971
Q9H061	Transmembrane protein 126A OS=Homo sapiens GN=TMEM126A PE=1 SV=1	16	21.5	0.894	1.039	0.896	0.838	0.841
Q9H008	Phospholysine phosphohistidine inorganic pyrophosphate phosphatase OS=Homo sapiens GN=LHPP PE=1 SV=2	35	29.1	0.981	1.031	1.02	1.453	1.427
Q9GZZ9	Ubiquitin-like modifier-activating enzyme 5 OS=Homo sapiens GN=UBA5 PE=1 SV=1	17	44.8	0.965	0.916	0.971	0.884	0.842
Q9GZZ1	N-alpha-acetyltransferase 50 OS=Homo sapiens GN=NAA50 PE=1 SV=1	2	19.4	1.031	0.966	1.12	0.981	1.05
Q9GZY8-2	Isoform 2 of Mitochondrial fission factor OS=Homo sapiens GN=MFF	21	33	0.797	0.836	0.765	0.681	0.677
Q9GZV7	Hyaluronan and proteoglycan link protein 2 OS=Homo sapiens GN=HAPLN2 PE=2 SV=1	105	37.8	1.247	1.142	1.421	1.906	2.194
Q9GZU8	Protein FAM192A OS=Homo sapiens GN=FAM192A PE=1 SV=1	5	28.9	0.96	0.943	0.939	0.814	1.011
Q9GZT9	Egl nine homolog 1 OS=Homo sapiens GN=EGLN1 PE=1 SV=1	14	46	1.051	0.944	1.028	0.978	0.964
Q9GZT8	NIF3-like protein 1 OS=Homo sapiens GN=NIF3L1 PE=1 SV=2	42	41.9	1.028	1.042	1.092	1.159	1.174
Q9GZT4	Serine racemase OS=Homo sapiens GN=SRR PE=1 SV=1	8	36.5	0.971	0.939	0.987	1.095	0.956
Q9GZT3	SRA stem-loop-interacting RNA-binding protein, mitochondrial OS=Homo sapiens GN=SLIRP PE=1 SV=1	14	12.3	0.843	0.967	0.759	0.617	0.678
Q9GZS3	WD repeat-containing protein 61 OS=Homo sapiens GN=WDR61 PE=1 SV=1	2	33.6	0.439	0.778	0.606	0.63	0.621
Q9GZR7	ATP-dependent RNA helicase DDX24 OS=Homo sapiens GN=DDX24 PE=1 SV=1	2	96.3	1.475	1.352	1.283	0.923	1.059
Q9GZR2	RNA exonuclease 4 OS=Homo sapiens GN=REXO4 PE=1 SV=2	2	46.6	1.473	1.091	1.299	0.88	0.906
Q9GZQ3	COMM domain-containing protein 5 OS=Homo sapiens GN=COMMD5 PE=1 SV=1	2	24.7
Q9GZP4	PITH domain-containing protein 1 OS=Homo sapiens GN=PITHD1 PE=1 SV=1	34	24.2	0.786	0.908	0.892	1.032	0.915
Q9GZN8-2	Isoform 2 of UPF0687 protein C20orf27 OS=Homo sapiens GN=C20orf27	6	21.6	0.893	0.819	0.777	0.843	0.813
Q9GZN7	Protein rogdi homolog OS=Homo sapiens GN=ROGDI PE=1 SV=1	20	32.2	0.825	0.901	0.88	0.8	0.696
Q9GZM8-2	Isoform 2 of Nuclear distribution protein nudE-like 1 OS=Homo sapiens GN=NDEL1	19	40.6	1.22	1.111	1.102	0.986	0.989
Q9GZM7	Tubulointerstitial nephritis antigen-like OS=Homo sapiens GN=TINAGL1 PE=1 SV=1	4	52.4	1.33	1.466	1.992	2.788	2.094
Q9C0I1	Myotubularin-related protein 12 OS=Homo sapiens GN=MTMR12 PE=1 SV=2	21	86.1	0.862	0.803	0.833	0.73	0.671
Q9C0H6-2	Isoform 2 of Kelch-like protein 4 OS=Homo sapiens GN=KLHL4	2	80.8	1.147	1.077	1.128	0.953	1.101
Q9C0H5-2	Isoform 2 of Rho GTPase-activating protein 39 OS=Homo sapiens GN=ARHGAP39	8	125	1.063	0.942	0.907	0.732	0.602
Q9C0H2-4	Isoform 4 of Protein tweety homolog 3 OS=Homo sapiens GN=TTYH3	19	57.9	1.025	1.104	1.035	0.969	0.898
Q9C0E8-4	Isoform 4 of Protein lunapark OS=Homo sapiens GN=LNP	22	50.8	0.752	0.869	0.779	0.84	0.736
Q9C0D3	Protein zyg-11 homolog B OS=Homo sapiens GN=ZYG11B PE=1 SV=2	7	83.9	1.069	1.072	0.986	0.861	0.941
Q9C0D0	Phosphatase and actin regulator 1 OS=Homo sapiens GN=PHACTR1 PE=1 SV=3	12	66.3	0.912	0.869	0.79	0.738	0.633
Q9C0C9	(E3-independent) E2 ubiquitin-conjugating enzyme OS=Homo sapiens GN=UBE2O PE=1 SV=3	60	141.2	0.963	0.917	1.013	0.932	1.028
Q9C0C2	182 kDa tankyrase-1-binding protein OS=Homo sapiens GN=TNKS1BP1 PE=1 SV=4	14	181.7	0.936	0.921	0.947	0.818	0.874
Q9C0B5	Palmitoyltransferase ZDHHC5 OS=Homo sapiens GN=ZDHHC5 PE=1 SV=2	18	77.5	1.062	1.127	0.975	0.84	0.894
Q9C0B0	RING finger protein unkempt homolog OS=Homo sapiens GN=UNK PE=1 SV=2	2	88
Q9C040-2	Isoform 2 of Tripartite motif-containing protein 2 OS=Homo sapiens GN=TRIM2	87	84.5	0.961	0.998	1.021	0.981	0.986
Q9C026-5	Isoform 5 of E3 ubiquitin-protein ligase TRIM9 OS=Homo sapiens GN=TRIM9	6	61.3	0.903	0.968	0.918	0.854	0.77
Q9BZZ5	Apoptosis inhibitor 5 OS=Homo sapiens GN=API5 PE=1 SV=3	21	59	0.958	1.05	0.982	0.991	0.992
Q9BZV1	UBX domain-containing protein 6 OS=Homo sapiens GN=UBXN6 PE=1 SV=1	42	49.7	0.96	0.944	0.887	0.819	0.698
Q9BZM5	NKG2D ligand 2 OS=Homo sapiens GN=ULBP2 PE=1 SV=1	2	27.4	0.882	0.871	0.951	0.98	1.062
Q9BZM1	Group XIIA secretory phospholipase A2 OS=Homo sapiens GN=PLA2G12A PE=1 SV=1	1	21.1	1.209	0.968	1.086	1.129	1.127
Q9BZL4	Protein phosphatase 1 regulatory subunit 12C OS=Homo sapiens GN=PPP1R12C PE=1 SV=1	14	84.8	1.28	1.029	1.111	1.05	1.037
Q9BZK7	F-box-like/WD repeat-containing protein TBL1XR1 OS=Homo sapiens GN=TBL1XR1 PE=1 SV=1	2	55.6	0.515	0.793	0.64	0.7	0.6
Q9BZJ0	Crooked neck-like protein 1 OS=Homo sapiens GN=CRNKL1 PE=1 SV=4	3	100.4	0.859	0.899	1.043	0.878	0.83
Q9BZI7	Regulator of nonsense transcripts 3B OS=Homo sapiens GN=UPF3B PE=1 SV=1	6	57.7	1.048	0.943	1.25	1.314	1.295
Q9BZG9-2	Isoform 2 of Ly-6/neurotoxin-like protein 1 OS=Homo sapiens GN=LYNX1	14	12.6	1.127	1.248	1.609	1.25	1.391
Q9BZF3-5	Isoform 5 of Oxysterol-binding protein-related protein 6 OS=Homo sapiens GN=OSBPL6	4	108.9	0.834	0.983	1.008	1.267	1.077
Q9BZE9-2	Isoform 2 of Tether containing UBX domain for GLUT4 OS=Homo sapiens GN=ASPSCR1	16	69.9	0.975	0.981	1.09	1.02	1.052
Q9BZD3	Putative GRINL1B complex locus protein 2 OS=Homo sapiens GN=GCOM2 PE=5 SV=2	2	41.7	1.113	0.807	0.948	0.833	0.951
Q9BZA7	Protocadherin-11 X-linked OS=Homo sapiens GN=PCDH11X PE=2 SV=1	2	147.5
Q9BZ95	Histone-lysine N-methyltransferase NSD3 OS=Homo sapiens GN=WHSC1L1 PE=1 SV=1	2	161.5	0.983	1.103	0.885	0.796	0.742
Q9BZ23	Pantothenate kinase 2, mitochondrial OS=Homo sapiens GN=PANK2 PE=1 SV=3	6	62.6	1.011	0.893	0.975	0.919	0.895
Q9BYV8	Centrosomal protein of 41 kDa OS=Homo sapiens GN=CEP41 PE=1 SV=1	28	41.3	0.974	0.953	0.935	0.967	0.973
Q9BYN8	28S ribosomal protein S26, mitochondrial OS=Homo sapiens GN=MRPS26 PE=1 SV=1	4	24.2	0.744	0.86	0.811	0.732	0.668
Q9BYH1	Seizure 6-like protein OS=Homo sapiens GN=SEZ6L PE=1 SV=1	7	111.7	1.135	1.084	1.07	1.084	1.145
Q9BYD6	39S ribosomal protein L1, mitochondrial OS=Homo sapiens GN=MRPL1 PE=1 SV=2	10	36.9	0.759	1.004	0.831	0.726	0.758
Q9BYD2	39S ribosomal protein L9, mitochondrial OS=Homo sapiens GN=MRPL9 PE=1 SV=2	6	30.2	0.783	0.904	0.819	1.023	0.93
Q9BYD1	39S ribosomal protein L13, mitochondrial OS=Homo sapiens GN=MRPL13 PE=1 SV=1	4	20.7	0.785	1.032	0.857	0.765	0.892
Q9BYC9	39S ribosomal protein L20, mitochondrial OS=Homo sapiens GN=MRPL20 PE=1 SV=1	2	17.4	0.773	0.962	0.822	0.79	0.754
Q9BYB0	SH3 and multiple ankyrin repeat domains protein 3 OS=Homo sapiens GN=SHANK3 PE=1 SV=3	8	184.6	1.21	1.053	1.094	0.981	0.984
Q9BY89	Uncharacterized protein KIAA1671 OS=Homo sapiens GN=KIAA1671 PE=1 SV=2	6	196.6	1.024	0.89	0.965	0.996	0.741
Q9BY67-5	Isoform 5 of Cell adhesion molecule 1 OS=Homo sapiens GN=CADM1	67	45.6	1.003	0.952	1.046	1.018	0.934
Q9BY50	Signal peptidase complex catalytic subunit SEC11C OS=Homo sapiens GN=SEC11C PE=1 SV=3	3	21.5	0.798	0.773	0.724	0.703	0.658
Q9BY44	Eukaryotic translation initiation factor 2A OS=Homo sapiens GN=EIF2A PE=1 SV=3	10	64.9	0.916	0.914	0.88	0.766	0.757
Q9BXX0	EMILIN-2 OS=Homo sapiens GN=EMILIN2 PE=1 SV=3	4	115.6	0.884	1.036	1.053	1.033	0.963
Q9BXV9	Uncharacterized protein C14orf142 OS=Homo sapiens GN=C14orf142 PE=1 SV=2	7	10.9	1.028	1.164	1.15	1.134	1.263
Q9BXP5	Serrate RNA effector molecule homolog OS=Homo sapiens GN=SRRT PE=1 SV=1	9	100.6	0.759	0.824	0.924	0.75	0.71
Q9BXP2	Solute carrier family 12 member 9 OS=Homo sapiens GN=SLC12A9 PE=1 SV=1	8	96	1.125	1.169	1.031	1.075	1.021
Q9BXM9	FSD1-like protein OS=Homo sapiens GN=FSD1L PE=1 SV=2	10	59.5	0.916	0.93	0.87	0.891	0.72
Q9BXK1	Krueppel-like factor 16 OS=Homo sapiens GN=KLF16 PE=1 SV=1	2	25.4	1.08	0.935	1.234	1.313	1.376
Q9BXJ3	Complement C1q tumor necrosis factor-related protein 4 OS=Homo sapiens GN=C1QTNF4 PE=1 SV=2	2	35.2	0.947	0.87	0.813	0.658	0.651
Q9BXI6-2	Isoform 2 of TBC1 domain family member 10A OS=Homo sapiens GN=TBC1D10A	4	57.9	1.036	0.873	0.843	0.836	0.744
Q9BX95	Sphingosine-1-phosphate phosphatase 1 OS=Homo sapiens GN=SGPP1 PE=1 SV=2	6	49.1	0.986	1.109	1.102	1.124	0.86
Q9BX70	BTB/POZ domain-containing protein 2 OS=Homo sapiens GN=BTBD2 PE=1 SV=1	2	55.9	1.033	1.051	0.868	0.8	0.795
Q9BX68	Histidine triad nucleotide-binding protein 2, mitochondrial OS=Homo sapiens GN=HINT2 PE=1 SV=1	24	17.2	0.986	0.987	0.98	0.916	0.961
Q9BX67	Junctional adhesion molecule C OS=Homo sapiens GN=JAM3 PE=1 SV=1	33	35	1.381	1.3	1.273	1.368	1.725
Q9BX66-12	Isoform 12 of Sorbin and SH3 domain-containing protein 1 OS=Homo sapiens GN=SORBS1	84	143.7	0.951	0.979	0.98	0.986	1.006
Q9BX66	Sorbin and SH3 domain-containing protein 1 OS=Homo sapiens GN=SORBS1 PE=1 SV=3	77	142.4	1.071	1.039	1.034	1.025	1.098
Q9BX40	Protein LSM14 homolog B OS=Homo sapiens GN=LSM14B PE=1 SV=1	4	42	0.8	1.003	0.803	0.945	0.893
Q9BWU0	Kanadaptin OS=Homo sapiens GN=SLC4A1AP PE=1 SV=1	2	88.8	0.953	0.851	0.962	0.785	0.701
Q9BWQ8	Protein lifeguard 2 OS=Homo sapiens GN=FAIM2 PE=1 SV=1	28	35.1	1.489	1.442	1.452	1.013	1.131
Q9BWL3	Uncharacterized protein C1orf43 OS=Homo sapiens GN=C1orf43 PE=2 SV=1	4	28.8	0.951	0.996	0.93	0.95	0.905
Q9BWJ5	Splicing factor 3B subunit 5 OS=Homo sapiens GN=SF3B5 PE=1 SV=1	6	10.1	0.882	1.017	0.926	0.994	0.895
Q9BWH6	RNA polymerase II-associated protein 1 OS=Homo sapiens GN=RPAP1 PE=1 SV=3	4	152.7	0.851	0.908	0.967	1.071	0.908
Q9BWH2	FUN14 domain-containing protein 2 OS=Homo sapiens GN=FUNDC2 PE=1 SV=2	8	20.7	0.92	1.162	0.908	0.89	1.002
Q9BW92	Threonine--tRNA ligase, mitochondrial OS=Homo sapiens GN=TARS2 PE=1 SV=1	6	81	0.735	0.848	0.852	0.746	0.651
Q9BW85	Coiled-coil domain-containing protein 94 OS=Homo sapiens GN=CCDC94 PE=1 SV=1	2	37.1	0.948	0.98	0.928	0.933	1.007
Q9BW83	Intraflagellar transport protein 27 homolog OS=Homo sapiens GN=IFT27 PE=1 SV=1	1	20.5
Q9BW60	Elongation of very long chain fatty acids protein 1 OS=Homo sapiens GN=ELOVL1 PE=1 SV=1	4	32.6	1.335	1.372	1.085	1.198	1.692
Q9BW34	EEF1D protein (Fragment) OS=Homo sapiens GN=EEF1D PE=2 SV=2	38	60.8	1.289	1.295	1.39	1.229	1.336
Q9BW30	Tubulin polymerization-promoting protein family member 3 OS=Homo sapiens GN=TPPP3 PE=1 SV=1	67	19	1.44	1.133	1.313	1.439	1.938
Q9BW27	Nuclear pore complex protein Nup85 OS=Homo sapiens GN=NUP85 PE=1 SV=1	2	75	0.822	0.891	0.903	0.986	0.912
Q9BVL4	Selenoprotein O OS=Homo sapiens GN=SELO PE=2 SV=3	2	73.4	0.617	0.783	0.741	0.622	0.708
Q9BVJ6	U3 small nucleolar RNA-associated protein 14 homolog A OS=Homo sapiens GN=UTP14A PE=1 SV=1	2	87.9	0.647	0.797	0.739	0.586	0.419
Q9BVG4	Protein PBDC1 OS=Homo sapiens GN=PBDC1 PE=1 SV=1	4	26	0.71	0.84	0.765	0.877	0.866
Q9BVA1	Tubulin beta-2B chain OS=Homo sapiens GN=TUBB2B PE=1 SV=1	1360	49.9	0.893	0.783	0.838	0.752	0.727
Q9BVA0	Katanin p80 WD40 repeat-containing subunit B1 OS=Homo sapiens GN=KATNB1 PE=1 SV=1	15	72.3	0.966	0.975	0.998	0.924	0.883
Q9BV86-2	Isoform 2 of N-terminal Xaa-Pro-Lys N-methyltransferase 1 OS=Homo sapiens GN=NTMT1	4	15.9	0.729	0.71	0.718	0.751	0.703
Q9BV79	Trans-2-enoyl-CoA reductase, mitochondrial OS=Homo sapiens GN=MECR PE=1 SV=2	19	40.4	1.081	1.242	1.071	1.039	1.088
Q9BV68	E3 ubiquitin-protein ligase RNF126 OS=Homo sapiens GN=RNF126 PE=1 SV=1	2	35.6	0.802	0.97	0.834	0.796	0.674
Q9BV44	THUMP domain-containing protein 3 OS=Homo sapiens GN=THUMPD3 PE=1 SV=1	2	57	1.055	0.99	0.978	0.867	0.815
Q9BV40	Vesicle-associated membrane protein 8 OS=Homo sapiens GN=VAMP8 PE=1 SV=1	2	11.4	1.113	1.214	0.965	0.922	0.968
Q9BV35-3	Isoform 3 of Calcium-binding mitochondrial carrier protein SCaMC-3 OS=Homo sapiens GN=SLC25A23	16	54	0.778	0.851	0.77	0.715	0.6
Q9BV20	Methylthioribose-1-phosphate isomerase OS=Homo sapiens GN=MRI1 PE=1 SV=1	14	39.1	1.019	0.933	1.011	1.098	1.227
Q9BV19	Uncharacterized protein C1orf50 OS=Homo sapiens GN=C1orf50 PE=1 SV=2	4	21.9	0.513	0.643	0.599	0.702	0.579
Q9BUW7	UPF0184 protein C9orf16 OS=Homo sapiens GN=C9orf16 PE=1 SV=1	2	9
Q9BUU9	Tubulin beta chain (Fragment) OS=Homo sapiens GN=TUBB PE=2 SV=1	981	38.3	0.95	0.855	0.881	0.823	0.748
Q9BUR5	MICOS complex subunit MIC26 OS=Homo sapiens GN=APOO PE=1 SV=1	18	22.3	1.02	1.18	1.308	1.379	1.43
Q9BUP3-3	Isoform 3 of Oxidoreductase HTATIP2 OS=Homo sapiens GN=HTATIP2	4	30.1	1.116	1.051	0.94	0.77	1.21
Q9BUP0	EF-hand domain-containing protein D1 OS=Homo sapiens GN=EFHD1 PE=1 SV=1	45	26.9	1.283	1.151	1.468	1.895	2.327
Q9BUN5-3	Isoform 2 of Coiled-coil domain-containing protein 28B OS=Homo sapiens GN=CCDC28B	2	26.9
Q9BUN1	Protein MENT OS=Homo sapiens GN=MENT PE=2 SV=1	3	36.7	2.269	1.59	0.738	0.56	0.463
Q9BUL8	Programmed cell death protein 10 OS=Homo sapiens GN=PDCD10 PE=1 SV=1	6	24.7	1.477	1.267	1.422	1.13	1.339
Q9BUK6	Protein misato homolog 1 OS=Homo sapiens GN=MSTO1 PE=1 SV=1	2	61.8	0.788	0.912	0.844	0.769	0.829
Q9BUK0-4	Isoform 4 of Coiled-coil-helix-coiled-coil-helix domain-containing protein 7 OS=Homo sapiens GN=CHCHD7	2	13	1.122	1.335	1.517	1.594	1.652
Q9BUH6	Protein PAXX OS=Homo sapiens GN=C9orf142 PE=1 SV=2	4	21.6	0.834	0.935	0.975	1.471	1.176
Q9BUF5	Tubulin beta-6 chain OS=Homo sapiens GN=TUBB6 PE=1 SV=1	597	49.8	1.114	1.063	0.958	0.923	0.99
Q9BUE6-2	Isoform 2 of Iron-sulfur cluster assembly 1 homolog, mitochondrial OS=Homo sapiens GN=ISCA1	7	19.3	0.898	0.916	0.855	0.766	0.863
Q9BUB7	Transmembrane protein 70, mitochondrial OS=Homo sapiens GN=TMEM70 PE=1 SV=2	4	29	0.718	0.952	0.802	0.763	0.795
Q9BU89	Deoxyhypusine hydroxylase OS=Homo sapiens GN=DOHH PE=1 SV=1	4	32.9	1.022	0.962	0.973	0.927	0.925
Q9BU61	NADH dehydrogenase [ubiquinone] 1 alpha subcomplex assembly factor 3 OS=Homo sapiens GN=NDUFAF3 PE=1 SV=1	12	20.3	0.847	1.012	0.867	0.767	0.871
Q9BU02	Thiamine-triphosphatase OS=Homo sapiens GN=THTPA PE=1 SV=3	6	25.6	1.055	0.952	1.096	1.128	1.035
Q9BTZ2	Dehydrogenase/reductase SDR family member 4 OS=Homo sapiens GN=DHRS4 PE=1 SV=3	2	29.5	0.914	0.772	1.014	0.9	0.797
Q9BTW9-4	Isoform 4 of Tubulin-specific chaperone D OS=Homo sapiens GN=TBCD	22	138.6	0.818	0.901	0.891	0.854	0.77
Q9BTV5	Fibronectin type III and SPRY domain-containing protein 1 OS=Homo sapiens GN=FSD1 PE=1 SV=1	38	55.8	0.909	0.982	0.91	0.833	0.822
Q9BTV4	Transmembrane protein 43 OS=Homo sapiens GN=TMEM43 PE=1 SV=1	8	44.8	1.008	0.977	1.034	1.183	0.987
Q9BTU6	Phosphatidylinositol 4-kinase type 2-alpha OS=Homo sapiens GN=PI4K2A PE=1 SV=1	13	54	0.734	0.999	0.882	1.003	0.921
Q9BTT0	Acidic leucine-rich nuclear phosphoprotein 32 family member E OS=Homo sapiens GN=ANP32E PE=1 SV=1	6	30.7	0.969	0.951	0.817	0.667	0.574
Q9BTN0	Leucine-rich repeat and fibronectin type-III domain-containing protein 3 OS=Homo sapiens GN=LRFN3 PE=2 SV=1	2	66.2	0.73	0.739	0.749	0.59	0.65
Q9BTL3	RNMT-activating mini protein OS=Homo sapiens GN=FAM103A1 PE=1 SV=1	2	14.4	0.843	0.916	0.805	0.64	0.599
Q9BTE6-3	Isoform 3 of Alanyl-tRNA editing protein Aarsd1 OS=Homo sapiens GN=AARSD1	11	65.7	1.033	1.089	1.013	1.04	0.907
Q9BTE1	Dynactin subunit 5 OS=Homo sapiens GN=DCTN5 PE=1 SV=1	6	20.1	0.676	0.801	0.752	0.651	0.778
Q9BTC0	Death-inducer obliterator 1 OS=Homo sapiens GN=DIDO1 PE=1 SV=5	2	243.7	0.967	0.993	1.081	1.032	0.949
Q9BT88	Synaptotagmin-11 OS=Homo sapiens GN=SYT11 PE=1 SV=2	12	48.3	0.984	0.981	0.984	1.069	1.041
Q9BT40	Inositol polyphosphate 5-phosphatase K OS=Homo sapiens GN=INPP5K PE=1 SV=3	8	51.1	0.796	0.858	0.858	0.795	0.765
Q9BT22	Chitobiosyldiphosphodolichol beta-mannosyltransferase OS=Homo sapiens GN=ALG1 PE=1 SV=2	12	52.5	0.627	0.679	0.616	0.553	0.557
Q9BSW7	Synaptotagmin-17 OS=Homo sapiens GN=SYT17 PE=1 SV=1	4	53.8	0.887	0.894	0.847	0.719	0.698
Q9BSU1	UPF0183 protein C16orf70 OS=Homo sapiens GN=C16orf70 PE=1 SV=1	2	47.5	0.715	0.84	1.053	1.328	0.868
Q9BST9	Rhotekin OS=Homo sapiens GN=RTKN PE=1 SV=2	2	62.6	1.223	1.052	1.09	0.793	0.965
Q9BSR8	Protein YIPF4 OS=Homo sapiens GN=YIPF4 PE=1 SV=1	2	27.1	0.961	0.956	0.901	0.739	0.966
Q9BSQ5-2	Isoform 2 of Cerebral cavernous malformations 2 protein OS=Homo sapiens GN=CCM2	2	51.4	0.945	0.883	0.881	0.905	0.681
Q9BSL1	Ubiquitin-associated domain-containing protein 1 OS=Homo sapiens GN=UBAC1 PE=1 SV=1	7	45.3	0.848	0.883	0.792	0.72	0.634
Q9BSJ8-2	Isoform 2 of Extended synaptotagmin-1 OS=Homo sapiens GN=ESYT1	62	123.9	0.929	1.003	0.93	0.861	0.808
Q9BSJ2-4	Isoform 3 of Gamma-tubulin complex component 2 OS=Homo sapiens GN=TUBGCP2	4	105.6	0.903	0.874	0.854	0.732	0.67
Q9BSH4	Translational activator of cytochrome c oxidase 1 OS=Homo sapiens GN=TACO1 PE=1 SV=1	2	32.5
Q9BSF4	Mitochondrial import inner membrane translocase subunit Tim29 OS=Homo sapiens GN=TIMM29 PE=1 SV=2	12	29.2	1.279	1.286	1.14	0.997	1.119
Q9BSF0	Small membrane A-kinase anchor protein OS=Homo sapiens GN=C2orf88 PE=1 SV=2	8	11	1.18	1.284	1.24	1.584	1.67
Q9BSA9	Endosomal/lysomomal potassium channel TMEM175 OS=Homo sapiens GN=TMEM175 PE=1 SV=1	4	55.6	1.183	1.629	1.623	1.871	1.76
Q9BS92	Protein NipSnap homolog 3B OS=Homo sapiens GN=NIPSNAP3B PE=2 SV=1	12	28.3	0.954	1.16	1.029	1.146	1.011
Q9BS26	Endoplasmic reticulum resident protein 44 OS=Homo sapiens GN=ERP44 PE=1 SV=1	30	46.9	1.099	1.006	1.103	1.147	1.195
Q9BRZ2	E3 ubiquitin-protein ligase TRIM56 OS=Homo sapiens GN=TRIM56 PE=1 SV=3	2	81.4	1.144	0.898	1.207	0.993	1.15
Q9BRX8	Redox-regulatory protein FAM213A OS=Homo sapiens GN=FAM213A PE=1 SV=3	36	25.7	0.946	1.128	0.963	1.019	1.015
Q9BRV8-2	Isoform 2 of Suppressor of IKBKE 1 OS=Homo sapiens GN=SIKE1	2	24.2	1.624	1.579	1.197	1.614	1.622
Q9BRT3	Migration and invasion enhancer 1 OS=Homo sapiens GN=MIEN1 PE=1 SV=1	22	12.4	1.004	0.894	0.97	1.026	1.005
Q9BRT2	Ubiquinol-cytochrome-c reductase complex assembly factor 2 OS=Homo sapiens GN=UQCC2 PE=1 SV=1	22	14.9	1.128	1.187	1.055	0.955	0.94
Q9BRS8	La-related protein 6 OS=Homo sapiens GN=LARP6 PE=1 SV=1	4	54.7	0.966	0.999	0.919	0.738	0.749
Q9BRP8	Partner of Y14 and mago OS=Homo sapiens GN=PYM1 PE=1 SV=1	10	22.6	0.921	1.135	1.04	0.87	1
Q9BRK5	45 kDa calcium-binding protein OS=Homo sapiens GN=SDF4 PE=1 SV=1	4	41.8	1.071	1.223	1.094	0.934	1.085
Q9BRF8	Serine/threonine-protein phosphatase CPPED1 OS=Homo sapiens GN=CPPED1 PE=1 SV=3	16	35.5	0.912	0.961	0.896	1.109	1.189
Q9BRA2	Thioredoxin domain-containing protein 17 OS=Homo sapiens GN=TXNDC17 PE=1 SV=1	5	13.9	0.755	0.655	0.713	0.802	0.765
Q9BR76	Coronin-1B OS=Homo sapiens GN=CORO1B PE=1 SV=1	9	54.2	0.907	0.922	1.099	1.453	1.563
Q9BR01	Sulfotransferase 4A1 OS=Homo sapiens GN=SULT4A1 PE=1 SV=2	20	33.1	0.698	0.808	0.781	0.91	0.815
Q9BQT9-2	Isoform 2 of Calsyntenin-3 OS=Homo sapiens GN=CLSTN3	4	107	0.929	0.857	0.968	0.934	0.799
Q9BQS8-4	Isoform 4 of FYVE and coiled-coil domain-containing protein 1 OS=Homo sapiens GN=FYCO1	4	168.8	1.05	1.066	1.026	1.158	1.428
Q9BQS7-3	Isoform 3 of Hephaestin OS=Homo sapiens GN=HEPH	2	136.6	0.936	0.945	0.768	0.929	0.882
Q9BQI9	Nuclear receptor-interacting protein 2 OS=Homo sapiens GN=NRIP2 PE=1 SV=3	2	31.3	1.011	1.125	1.009	1	1.779
Q9BQI7	PH and SEC7 domain-containing protein 2 OS=Homo sapiens GN=PSD2 PE=2 SV=3	10	84.6	0.972	0.963	1.073	1.031	1.089
Q9BQI5-2	Isoform 2 of SH3-containing GRB2-like protein 3-interacting protein 1 OS=Homo sapiens GN=SGIP1	94	89.7	0.894	0.972	0.877	0.805	0.735
Q9BQI0-2	Isoform 2 of Allograft inflammatory factor 1-like OS=Homo sapiens GN=AIF1L	18	20	1.683	1.344	1.47	1.146	2
Q9BQG2	Peroxisomal NADH pyrophosphatase NUDT12 OS=Homo sapiens GN=NUDT12 PE=1 SV=1	5	52	0.984	0.915	0.847	0.773	0.952
Q9BQG1	Synaptotagmin-3 OS=Homo sapiens GN=SYT3 PE=2 SV=1	8	63.3	1.65	1.509	1.462	1.198	1.203
Q9BQC3	Diphthamide biosynthesis protein 2 OS=Homo sapiens GN=DPH2 PE=1 SV=1	2	52.1	1.104	1.076	0.944	0.828	0.848
Q9BQA1	Methylosome protein 50 OS=Homo sapiens GN=WDR77 PE=1 SV=1	4	36.7	0.936	1.122	1.034	1.109	1.065
Q9BQ95	Evolutionarily conserved signaling intermediate in Toll pathway, mitochondrial OS=Homo sapiens GN=ECSIT PE=1 SV=1	12	49.1	0.759	1.198	0.781	0.714	0.649
Q9BQ70	Transcription factor 25 OS=Homo sapiens GN=TCF25 PE=1 SV=1	9	76.6	0.874	0.895	0.825	0.726	0.664
Q9BQ69	O-acetyl-ADP-ribose deacetylase MACROD1 OS=Homo sapiens GN=MACROD1 PE=1 SV=2	12	35.5	1.111	1.067	1.226	1.073	1.014
Q9BQ24-2	Isoform 2 of Zinc finger FYVE domain-containing protein 21 OS=Homo sapiens GN=ZFYVE21	8	28.5	0.822	0.854	0.952	1.046	0.992
Q9BPY8-3	Isoform 3 of Homeodomain-only protein OS=Homo sapiens GN=HOPX	2	10.4
Q9BPW8	Protein NipSnap homolog 1 OS=Homo sapiens GN=NIPSNAP1 PE=1 SV=1	58	33.3	0.927	1.034	0.959	0.78	0.776
Q9BPU6	Dihydropyrimidinase-related protein 5 OS=Homo sapiens GN=DPYSL5 PE=1 SV=1	83	61.4	0.988	0.903	1.044	1.058	1.125
Q99996-6	Isoform 6 of A-kinase anchor protein 9 OS=Homo sapiens GN=AKAP9	4	455.1	0.967	1.053	0.901	0.863	0.873
Q99963	Endophilin-A3 OS=Homo sapiens GN=SH3GL3 PE=1 SV=1	78	39.3	1.121	0.952	1.131	1.013	0.984
Q99962	Endophilin-A1 OS=Homo sapiens GN=SH3GL2 PE=1 SV=1	165	39.9	1.1	0.953	1.073	0.886	0.818
Q99961	Endophilin-A2 OS=Homo sapiens GN=SH3GL1 PE=1 SV=1	62	41.5	1.048	0.858	1.073	1.015	1.029
Q99959	Plakophilin-2 OS=Homo sapiens GN=PKP2 PE=1 SV=2	2	97.4	0.886	0.782	0.82	0.677	0.646
Q99952	Tyrosine-protein phosphatase non-receptor type 18 OS=Homo sapiens GN=PTPN18 PE=1 SV=2	2	50.5	0.687	0.894	0.01	0.01	0.674
Q99946	Proline-rich transmembrane protein 1 OS=Homo sapiens GN=PRRT1 PE=2 SV=2	4	31.4	0.706	0.78	0.615	0.655	0.628
Q99943	1-acyl-sn-glycerol-3-phosphate acyltransferase alpha OS=Homo sapiens GN=AGPAT1 PE=1 SV=2	2	31.7	1.052	0.506	1.158	0.34	0.53
Q99828-2	Isoform 2 of Calcium and integrin-binding protein 1 OS=Homo sapiens GN=CIB1	10	26	1.315	1.328	1.184	1.315	1.653
Q99816	Tumor susceptibility gene 101 protein OS=Homo sapiens GN=TSG101 PE=1 SV=2	25	43.9	0.939	0.939	0.891	0.934	0.871
Q99808-2	Isoform 2 of Equilibrative nucleoside transporter 1 OS=Homo sapiens GN=SLC29A1	6	58.9	0.768	0.986	0.869	0.999	0.793
Q99807	5-demethoxyubiquinone hydroxylase, mitochondrial OS=Homo sapiens GN=COQ7 PE=1 SV=3	6	24.3	0.916	0.981	0.829	0.961	0.778
Q99785	Putative uncharacterized protein (Fragment) OS=Homo sapiens PE=2 SV=1	4	32.4
Q99784	Noelin OS=Homo sapiens GN=OLFM1 PE=1 SV=4	28	55.3	0.805	0.994	0.8	0.707	0.626
Q99766	ATP synthase subunit s, mitochondrial OS=Homo sapiens GN=ATP5S PE=1 SV=3	2	24.9
Q99755	Phosphatidylinositol 4-phosphate 5-kinase type-1 alpha OS=Homo sapiens GN=PIP5K1A PE=1 SV=1	17	62.6	1.219	1.04	1.006	1.282	1.378
Q99732	Lipopolysaccharide-induced tumor necrosis factor-alpha factor OS=Homo sapiens GN=LITAF PE=1 SV=2	2	17.1	0.904	0.865	0.742	0.741	0.833
Q99729-3	Isoform 3 of Heterogeneous nuclear ribonucleoprotein A/B OS=Homo sapiens GN=HNRNPAB	22	30.6	1.05	1.196	1.036	1.021	1.308
Q99726	Zinc transporter 3 OS=Homo sapiens GN=SLC30A3 PE=1 SV=2	22	41.9	0.752	0.793	0.713	0.758	0.594
Q99700	Ataxin-2 OS=Homo sapiens GN=ATXN2 PE=1 SV=2	19	140.2	0.792	0.771	0.721	0.743	0.641
Q99698	Lysosomal-trafficking regulator OS=Homo sapiens GN=LYST PE=1 SV=3	6	428.9	0.906	0.859	0.881	0.654	0.569
Q99674	Cell growth regulator with EF hand domain protein 1 OS=Homo sapiens GN=CGREF1 PE=2 SV=2	4	31.9	0.887	1.023	0.93	0.73	0.726
Q99624	Sodium-coupled neutral amino acid transporter 3 OS=Homo sapiens GN=SLC38A3 PE=1 SV=1	2	55.7	1.304	1.339	1.286	1.401	1.347
Q99623	Prohibitin-2 OS=Homo sapiens GN=PHB2 PE=1 SV=2	55	33.3	0.83	0.995	0.851	0.732	0.659
Q99622	Protein C10 OS=Homo sapiens GN=C12orf57 PE=1 SV=1	4	13.2	1.058	1.002	1.25	1.417	1.275
Q99584	Protein S100-A13 OS=Homo sapiens GN=S100A13 PE=1 SV=1	37	11.5	1.083	1.308	1.006	1.176	1.111
Q99572	P2X purinoceptor 7 OS=Homo sapiens GN=P2RX7 PE=1 SV=4	14	68.5	1.213	0.939	1.087	0.81	1.301
Q99571-2	Isoform 2 of P2X purinoceptor 4 OS=Homo sapiens GN=P2RX4	1	45.3
Q99567	Nuclear pore complex protein Nup88 OS=Homo sapiens GN=NUP88 PE=1 SV=2	2	83.5	1.076	1.158	1.288	1.559	1.556
Q99549-2	Isoform 2 of M-phase phosphoprotein 8 OS=Homo sapiens GN=MPHOSPH8	2	97.6	0.951	0.994	0.959	0.823	0.781
Q99543	DnaJ homolog subfamily C member 2 OS=Homo sapiens GN=DNAJC2 PE=1 SV=4	3	72	0.771	0.84	1.088	1.123	1.184
Q99536	Synaptic vesicle membrane protein VAT-1 homolog OS=Homo sapiens GN=VAT1 PE=1 SV=2	32	41.9	1.033	1.077	1.077	1.388	1.402
Q99497	Protein deglycase DJ-1 OS=Homo sapiens GN=PARK7 PE=1 SV=2	99	19.9	1.114	0.984	1.186	1.069	1.161
Q99471	Prefoldin subunit 5 OS=Homo sapiens GN=PFDN5 PE=1 SV=2	33	17.3	1.021	0.972	1.094	1.241	1.232
Q99447-3	Isoform 3 of Ethanolamine-phosphate cytidylyltransferase OS=Homo sapiens GN=PCYT2	30	45.6	1.087	0.971	1.066	1.07	1.13
Q99442	Translocation protein SEC62 OS=Homo sapiens GN=SEC62 PE=1 SV=1	14	45.8	0.898	1.064	0.985	1.067	1.052
Q99426	Tubulin-folding cofactor B OS=Homo sapiens GN=TBCB PE=1 SV=2	44	27.3	1.155	0.984	1.26	1.115	1.182
Q99250	Sodium channel protein type 2 subunit alpha OS=Homo sapiens GN=SCN2A PE=1 SV=3	84	227.8	0.763	0.882	0.757	0.683	0.551
Q96TC7	Regulator of microtubule dynamics protein 3 OS=Homo sapiens GN=RMDN3 PE=1 SV=2	16	52.1	1.13	1.153	1.17	1.109	1.114
Q96TA2	ATP-dependent zinc metalloprotease YME1L1 OS=Homo sapiens GN=YME1L1 PE=1 SV=2	12	86.4	0.828	0.971	0.83	0.824	0.796
Q96TA1	Niban-like protein 1 OS=Homo sapiens GN=FAM129B PE=1 SV=3	6	84.1	0.981	0.925	0.998	1.041	1.054
Q96T76-8	Isoform 5 of MMS19 nucleotide excision repair protein homolog OS=Homo sapiens GN=MMS19	4	115.6	0.758	0.955	0.864	0.959	0.672
Q96T66	Nicotinamide/nicotinic acid mononucleotide adenylyltransferase 3 OS=Homo sapiens GN=NMNAT3 PE=1 SV=2	2	28.3	0.959	0.857	0.913	0.831	0.696
Q96T60	Bifunctional polynucleotide phosphatase/kinase OS=Homo sapiens GN=PNKP PE=1 SV=1	2	57	0.665	0.763	0.752	0.69	0.586
Q96T51	RUN and FYVE domain-containing protein 1 OS=Homo sapiens GN=RUFY1 PE=1 SV=2	11	79.8	1.108	1.105	1.061	0.968	1.119
Q96T49	Protein phosphatase 1 regulatory inhibitor subunit 16B OS=Homo sapiens GN=PPP1R16B PE=1 SV=1	4	63.5	0.991	0.853	0.777	0.655	0.672
Q96T37	Putative RNA-binding protein 15 OS=Homo sapiens GN=RBM15 PE=1 SV=2	6	107.1	0.824	0.818	0.835	0.681	0.555
Q96T23	Remodeling and spacing factor 1 OS=Homo sapiens GN=RSF1 PE=1 SV=2	2	163.7	0.733	0.918	1.242	1.301	1.033
Q96T17-2	Isoform 2 of MAP7 domain-containing protein 2 OS=Homo sapiens GN=MAP7D2	28	86.3	1.009	1.048	0.977	0.903	1.188
Q96SW2	Protein cereblon OS=Homo sapiens GN=CRBN PE=1 SV=1	12	50.5	0.84	0.872	0.938	1.021	0.962
Q96SU4-6	Isoform 6 of Oxysterol-binding protein-related protein 9 OS=Homo sapiens GN=OSBPL9	6	84.2	0.873	0.858	0.864	0.929	0.832
Q96ST2	Protein IWS1 homolog OS=Homo sapiens GN=IWS1 PE=1 SV=2	4	91.9	1.126	0.911	1.901	1.67	0.975
Q96SB4-3	Isoform 1 of SRSF protein kinase 1 OS=Homo sapiens GN=SRPK1	6	92.4
Q96S95	Calcium/calmodulin-dependent protein kinase II inhibitor 2 OS=Homo sapiens GN=CAMK2N2 PE=2 SV=1	2	8.7	0.46	0.638	0.48	0.623	0.468
Q96S55	ATPase WRNIP1 OS=Homo sapiens GN=WRNIP1 PE=1 SV=2	2	72.1	0.984	1.01	1.093	1.131	0.9
Q96S38	Ribosomal protein S6 kinase delta-1 OS=Homo sapiens GN=RPS6KC1 PE=1 SV=2	11	118.6	1.003	1.037	0.944	1.009	0.954
Q96S19	UPF0585 protein C16orf13 OS=Homo sapiens GN=C16orf13 PE=1 SV=2	17	22.6	1.223	1.099	1.094	1.056	1.044
Q96RZ2	N-acetylglucosamine-1-phosphate transferase, gamma subunit, isoform CRA_b OS=Homo sapiens GN=RJD9 PE=4 SV=1	2	36.8	0.907	0.939	0.783	0.83	1.129
Q96RY7	Intraflagellar transport protein 140 homolog OS=Homo sapiens GN=IFT140 PE=1 SV=1	4	165.1	1.034	0.961	1.014	1.134	0.87
Q96RU3	Formin-binding protein 1 OS=Homo sapiens GN=FNBP1 PE=1 SV=2	26	71.3	1.203	1.087	1.161	1.171	1.38
Q96RT1-8	Isoform 8 of Erbin OS=Homo sapiens GN=ERBIN	8	158.9	1.102	1.059	1.178	1.162	1.227
Q96RS6	NudC domain-containing protein 1 OS=Homo sapiens GN=NUDCD1 PE=1 SV=2	6	66.7	1.109	0.954	1.151	1.029	0.893
Q96RR4	Calcium/calmodulin-dependent protein kinase kinase 2 OS=Homo sapiens GN=CAMKK2 PE=1 SV=2	22	64.7	0.828	1.012	0.805	0.781	0.67
Q96RQ3	Methylcrotonoyl-CoA carboxylase subunit alpha, mitochondrial OS=Homo sapiens GN=MCCC1 PE=1 SV=3	18	80.4	0.829	0.841	0.928	0.907	0.791
Q96RL7	Vacuolar protein sorting-associated protein 13A OS=Homo sapiens GN=VPS13A PE=1 SV=2	34	360	0.895	0.921	0.915	0.865	0.831
Q96RG5	Insulin receptor substrate 2 insertion mutant (Fragment) OS=Homo sapiens GN=IRS2 PE=4 SV=1	12	137.3	1.014	0.935	0.978	1.003	1.028
Q96RF0	Sorting nexin-18 OS=Homo sapiens GN=SNX18 PE=1 SV=2	8	68.9	0.993	0.992	0.974	1.287	1.345
Q96QZ7	Membrane-associated guanylate kinase, WW and PDZ domain-containing protein 1 OS=Homo sapiens GN=MAGI1 PE=1 SV=3	18	164.5	0.938	0.933	0.842	0.779	0.84
Q96QR8	Transcriptional activator protein Pur-beta OS=Homo sapiens GN=PURB PE=1 SV=3	12	33.2	0.753	0.888	0.775	0.776	0.693
Q96QK1	Vacuolar protein sorting-associated protein 35 OS=Homo sapiens GN=VPS35 PE=1 SV=2	80	91.6	0.829	0.845	0.891	0.909	0.739
Q96QF0	Rab-3A-interacting protein OS=Homo sapiens GN=RAB3IP PE=1 SV=1	2	53	0.715	0.426	0.552	0.684	0.737
Q96QE2	Proton myo-inositol cotransporter OS=Homo sapiens GN=SLC2A13 PE=1 SV=3	29	70.3	0.896	0.979	0.999	1.073	0.862
Q96Q42	Alsin OS=Homo sapiens GN=ALS2 PE=1 SV=2	12	183.5	0.844	0.916	0.849	0.795	0.778
Q96Q15	Serine/threonine-protein kinase SMG1 OS=Homo sapiens GN=SMG1 PE=1 SV=3	11	410.2	1.186	1.187	1.074	0.977	1.007
Q96Q05-2	Isoform 2 of Trafficking protein particle complex subunit 9 OS=Homo sapiens GN=TRAPPC9	26	139.3	0.865	0.888	0.905	0.845	0.797
Q96PY5-3	Isoform 2 of Formin-like protein 2 OS=Homo sapiens GN=FMNL2	105	124	1.191	1.2	1.176	1.212	1.571
Q96PX6	Coiled-coil domain-containing protein 85A OS=Homo sapiens GN=CCDC85A PE=2 SV=3	2	59.9	0.975	0.764	0.735	0.641	0.459
Q96PV0	Ras/Rap GTPase-activating protein SynGAP OS=Homo sapiens GN=SYNGAP1 PE=1 SV=4	62	148.2	0.96	0.861	0.885	0.778	0.627
Q96PU8	Protein quaking OS=Homo sapiens GN=QKI PE=1 SV=1	22	37.6	1.165	1.078	1.089	1.174	1.23
Q96PU5	E3 ubiquitin-protein ligase NEDD4-like OS=Homo sapiens GN=NEDD4L PE=1 SV=2	16	111.9	0.967	0.939	0.853	0.775	0.747
Q96PQ0	VPS10 domain-containing receptor SorCS2 OS=Homo sapiens GN=SORCS2 PE=1 SV=3	6	128.1	0.852	1.099	1.142	1.584	1.405
Q96PK6-5	Isoform 5 of RNA-binding protein 14 OS=Homo sapiens GN=RBM14	7	37	0.793	0.897	1.059	0.811	0.931
Q96PK6	RNA-binding protein 14 OS=Homo sapiens GN=RBM14 PE=1 SV=2	14	69.4	0.958	0.924	0.921	0.909	0.915
Q96PE7	Methylmalonyl-CoA epimerase, mitochondrial OS=Homo sapiens GN=MCEE PE=1 SV=1	7	18.7	0.996	1.049	0.94	0.752	0.729
Q96PE5	Opalin OS=Homo sapiens GN=OPALIN PE=2 SV=1	35	15.7	1.436	1.293	1.2	1.083	1.497
Q96PE3	Type I inositol 3,4-bisphosphate 4-phosphatase OS=Homo sapiens GN=INPP4A PE=1 SV=1	23	109.9	0.891	0.911	0.943	0.942	0.872
Q96PE2	Rho guanine nucleotide exchange factor 17 OS=Homo sapiens GN=ARHGEF17 PE=1 SV=1	6	221.5	0.931	1.03	0.988	1.082	0.927
Q96PC5	Melanoma inhibitory activity protein 2 OS=Homo sapiens GN=MIA2 PE=1 SV=4	10	159.7	0.986	0.985	0.963	0.851	0.912
Q96PB7	Noelin-3 OS=Homo sapiens GN=OLFM3 PE=1 SV=1	10	54.9	0.84	0.964	0.771	0.773	0.702
Q96P71	N-terminal EF-hand calcium-binding protein 3 OS=Homo sapiens GN=NECAB3 PE=1 SV=2	2	44.3	1.352	1.218	1.375	1.163	1.136
Q96P70	Importin-9 OS=Homo sapiens GN=IPO9 PE=1 SV=3	14	115.9	0.924	0.854	0.947	0.821	0.774
Q96P50	Arf-GAP with coiled-coil, ANK repeat and PH domain-containing protein 3 OS=Homo sapiens GN=ACAP3 PE=1 SV=2	2	92.4	0.943	0.976	0.977	0.727	0.705
Q96P48	Arf-GAP with Rho-GAP domain, ANK repeat and PH domain-containing protein 1 OS=Homo sapiens GN=ARAP1 PE=1 SV=3	6	162.1	0.778	0.735	0.867	1.018	0.986
Q96P47-4	Isoform 4 of Arf-GAP with GTPase, ANK repeat and PH domain-containing protein 3 OS=Homo sapiens GN=AGAP3	30	97.9	0.696	0.79	0.739	0.778	0.632
Q96NY7	Chloride intracellular channel protein 6 OS=Homo sapiens GN=CLIC6 PE=2 SV=3	2	73
Q96NW7	Leucine-rich repeat-containing protein 7 OS=Homo sapiens GN=LRRC7 PE=1 SV=1	3	172.5	1.053	0.969	1.156	0.906	0.645
Q96NT1	Nucleosome assembly protein 1-like 5 OS=Homo sapiens GN=NAP1L5 PE=2 SV=1	16	19.6	0.946	0.992	0.993	0.949	0.996
Q96NN9	Apoptosis-inducing factor 3 OS=Homo sapiens GN=AIFM3 PE=1 SV=1	12	66.7	0.953	0.985	0.996	0.909	0.864
Q96NL6	Sodium channel and clathrin linker 1 OS=Homo sapiens GN=SCLT1 PE=1 SV=2	4	80.9	1.17	1.175	1.021	0.934	0.932
Q96NL0	RUN domain-containing protein 3B OS=Homo sapiens GN=RUNDC3B PE=2 SV=1	2	52.8
Q96ND0	Protein FAM210A OS=Homo sapiens GN=FAM210A PE=1 SV=2	4	30.8	0.917	1.085	0.812	0.84	0.853
Q96N67	Dedicator of cytokinesis protein 7 OS=Homo sapiens GN=DOCK7 PE=1 SV=4	2	242.4	0.927	0.96	0.903	0.95	0.887
Q96N66	Lysophospholipid acyltransferase 7 OS=Homo sapiens GN=MBOAT7 PE=1 SV=2	10	52.7	0.918	0.935	0.883	0.855	0.807
Q96N16-2	Isoform 2 of Janus kinase and microtubule-interacting protein 1 OS=Homo sapiens GN=JAKMIP1	12	97.4	0.907	0.922	0.872	0.814	0.773
Q96N03	V-set and transmembrane domain-containing protein 2-like protein OS=Homo sapiens GN=VSTM2L PE=1 SV=1	2	22.3
Q96MZ0	Ganglioside-induced differentiation-associated protein 1-like 1 OS=Homo sapiens GN=GDAP1L1 PE=2 SV=2	21	41.9	0.691	0.808	0.758	0.67	0.564
Q96MF6	Coenzyme Q-binding protein COQ10 homolog A, mitochondrial OS=Homo sapiens GN=COQ10A PE=2 SV=2	2	27.7	0.913	0.952	0.913	0.841	0.879
Q96ME1-4	Isoform 4 of F-box/LRR-repeat protein 18 OS=Homo sapiens GN=FBXL18	16	78.9	0.787	0.853	0.832	0.788	0.753
Q96M27-2	Isoform 2 of Protein PRRC1 OS=Homo sapiens GN=PRRC1	6	48.5	1.055	1.044	1.04	1.019	1.051
Q96LW7	Caspase recruitment domain-containing protein 19 OS=Homo sapiens GN=CARD19 PE=1 SV=1	4	25.6
Q96LT7	Protein C9orf72 OS=Homo sapiens GN=C9orf72 PE=1 SV=2	2	54.3	0.937	0.885	0.836	0.787	0.694
Q96LR5	Ubiquitin-conjugating enzyme E2 E2 OS=Homo sapiens GN=UBE2E2 PE=1 SV=1	4	22.2	1.038	1.171	1.221	0.966	1.071
Q96LJ7	Dehydrogenase/reductase SDR family member 1 OS=Homo sapiens GN=DHRS1 PE=1 SV=1	4	33.9	0.448	0.516	0.564	0.8	0.994
Q96LD4	Tripartite motif-containing protein 47 OS=Homo sapiens GN=TRIM47 PE=1 SV=2	6	69.5	0.883	0.926	1.057	1.104	1.06
Q96L92	Sorting nexin-27 OS=Homo sapiens GN=SNX27 PE=1 SV=2	19	61.2	0.93	0.989	0.92	0.877	0.845
Q96L91	E1A-binding protein p400 OS=Homo sapiens GN=EP400 PE=1 SV=4	2	343.3	0.723	0.908	0.678	0.485	0.483
Q96L34-2	Isoform 2 of MAP/microtubule affinity-regulating kinase 4 OS=Homo sapiens GN=MARK4	20	75.3	0.926	0.879	0.9	0.795	0.656
Q96KR6	Protein FAM210B OS=Homo sapiens GN=FAM210B PE=1 SV=2	3	20.4	1.405	1.735	1.798	1.738	2.075
Q96KQ4	Apoptosis-stimulating of p53 protein 1 OS=Homo sapiens GN=PPP1R13B PE=1 SV=3	8	119.5	0.791	0.813	0.797	0.736	0.649
Q96KM6	Zinc finger protein 512B OS=Homo sapiens GN=ZNF512B PE=1 SV=1	7	97.2	1.041	1.162	1.171	1.155	1.083
Q96KG9	N-terminal kinase-like protein OS=Homo sapiens GN=SCYL1 PE=1 SV=1	20	89.6	0.856	0.88	0.829	0.725	0.723
Q96KG7	Multiple epidermal growth factor-like domains protein 10 OS=Homo sapiens GN=MEGF10 PE=1 SV=1	4	122.1	1.236	1.238	1.532	1.855	2.248
Q96KF7	Small integral membrane protein 8 OS=Homo sapiens GN=SMIM8 PE=1 SV=2	2	11.1
Q96K76-4	Isoform 4 of Ubiquitin carboxyl-terminal hydrolase 47 OS=Homo sapiens GN=USP47	18	154.6	0.969	0.918	0.961	0.957	0.896
Q96K21	Abscission/NoCut checkpoint regulator OS=Homo sapiens GN=ZFYVE19 PE=1 SV=3	4	51.5	1.19	1.17	1.263	1.159	1.342
Q96K19	E3 ubiquitin-protein ligase RNF170 OS=Homo sapiens GN=RNF170 PE=1 SV=2	6	29.8	0.796	0.931	0.842	0.936	1.061
Q96K17	Transcription factor BTF3 homolog 4 OS=Homo sapiens GN=BTF3L4 PE=1 SV=1	12	17.3	0.857	0.786	0.887	0.848	0.788
Q96JX3	Protein SERAC1 OS=Homo sapiens GN=SERAC1 PE=1 SV=1	2	74.1	0.868	1.27	0.849	1.085	0.982
Q96JQ0	Protocadherin-16 OS=Homo sapiens GN=DCHS1 PE=1 SV=1	2	346	1.406	1.096	1.107	0.687	0.897
Q96JN2-4	Isoform 4 of Coiled-coil domain-containing protein 136 OS=Homo sapiens GN=CCDC136	12	134.6	0.837	1.02	0.83	0.643	0.698
Q96JM3	Chromosome alignment-maintaining phosphoprotein 1 OS=Homo sapiens GN=CHAMP1 PE=1 SV=2	2	89
Q96JK2	DDB1- and CUL4-associated factor 5 OS=Homo sapiens GN=DCAF5 PE=1 SV=2	2	103.9	0.807	0.737	0.765	0.588	0.493
Q96JJ7	Protein disulfide-isomerase TMX3 OS=Homo sapiens GN=TMX3 PE=1 SV=2	33	51.8	0.828	0.963	0.842	0.76	0.805
Q96JH7	Deubiquitinating protein VCIP135 OS=Homo sapiens GN=VCPIP1 PE=1 SV=2	40	134.2	0.9	0.912	0.865	0.798	0.704
Q96JG6	Syndetin OS=Homo sapiens GN=VPS50 PE=1 SV=3	22	111.1	0.824	0.898	0.829	0.73	0.687
Q96JE9	Microtubule-associated protein 6 OS=Homo sapiens GN=MAP6 PE=1 SV=2	178	86.5	0.979	0.918	0.962	0.913	0.924
Q96JC1	Vam6/Vps39-like protein OS=Homo sapiens GN=VPS39 PE=1 SV=2	4	101.7
Q96JB5	CDK5 regulatory subunit-associated protein 3 OS=Homo sapiens GN=CDK5RAP3 PE=1 SV=2	21	56.9	0.977	0.949	1.024	0.951	0.93
Q96JB2	Conserved oligomeric Golgi complex subunit 3 OS=Homo sapiens GN=COG3 PE=1 SV=3	2	94	0.859	0.957	0.89	0.916	0.87
Q96J87	CUGBP Elav-like family member 6 OS=Homo sapiens GN=CELF6 PE=1 SV=1	4	50.4	1.33	1.141	0.989	1.028	1.014
Q96J02	E3 ubiquitin-protein ligase Itchy homolog OS=Homo sapiens GN=ITCH PE=1 SV=2	24	102.7	0.867	0.942	0.891	0.751	0.76
Q96J01	THO complex subunit 3 OS=Homo sapiens GN=THOC3 PE=1 SV=1	2	38.7
Q96IZ0	PRKC apoptosis WT1 regulator protein OS=Homo sapiens GN=PAWR PE=1 SV=1	6	36.5	1.242	1.372	1.095	1.36	1.384
Q96IX5	Up-regulated during skeletal muscle growth protein 5 OS=Homo sapiens GN=USMG5 PE=1 SV=1	8	6.5	0.895	1.174	0.841	0.776	0.931
Q96IV0	Peptide-N(4)-(N-acetyl-beta-glucosaminyl)asparagine amidase OS=Homo sapiens GN=NGLY1 PE=1 SV=1	4	74.3	0.985	1.246	1.066	0.996	1.124
Q96IJ6-2	Isoform 2 of Mannose-1-phosphate guanyltransferase alpha OS=Homo sapiens GN=GMPPA	6	52	0.946	0.947	0.953	0.926	0.977
Q96ID5	Immunoglobulin superfamily member 21 OS=Homo sapiens GN=IGSF21 PE=2 SV=1	42	51.8	1.058	1.084	1.008	1.006	0.967
Q96I99	Succinate--CoA ligase [GDP-forming] subunit beta, mitochondrial OS=Homo sapiens GN=SUCLG2 PE=1 SV=2	16	46.5	0.976	0.896	1.097	0.95	0.881
Q96I34	Protein phosphatase 1 regulatory subunit 16A OS=Homo sapiens GN=PPP1R16A PE=1 SV=1	2	57.8	0.732	0.695	0.729	0.52	0.562
Q96I23	Protein preY, mitochondrial OS=Homo sapiens GN=PYURF PE=1 SV=1	2	12.6	1.155	1.058	1.051	0.915	1.071
Q96HY7	Probable 2-oxoglutarate dehydrogenase E1 component DHKTD1, mitochondrial OS=Homo sapiens GN=DHTKD1 PE=1 SV=2	8	103	1.074	1.209	1.165	1.242	1.464
Q96HY6	DDRGK domain-containing protein 1 OS=Homo sapiens GN=DDRGK1 PE=1 SV=2	14	35.6	0.963	0.969	0.929	0.955	0.981
Q96HU8	GTP-binding protein Di-Ras2 OS=Homo sapiens GN=DIRAS2 PE=1 SV=1	28	22.5	0.759	0.857	0.768	0.721	0.645
Q96HU1-2	Isoform 2 of Small G protein signaling modulator 3 OS=Homo sapiens GN=SGSM3	2	88.3	1.083	1.042	0.862	0.672	0.601
Q96HS1	Serine/threonine-protein phosphatase PGAM5, mitochondrial OS=Homo sapiens GN=PGAM5 PE=1 SV=2	19	32	0.945	1.05	0.928	0.952	0.969
Q96HR9	Receptor expression-enhancing protein 6 OS=Homo sapiens GN=REEP6 PE=1 SV=1	4	20.7	0.87	0.915	0.811	0.689	0.741
Q96HR8	H/ACA ribonucleoprotein complex non-core subunit NAF1 OS=Homo sapiens GN=NAF1 PE=1 SV=2	1	53.7	0.633	0.679	0.704	0.636	0.51
Q96HQ2	CDKN2AIP N-terminal-like protein OS=Homo sapiens GN=CDKN2AIPNL PE=1 SV=1	1	13.2	0.988	1.004	0.904	1.05	1.001
Q96HN2	Adenosylhomocysteinase 3 OS=Homo sapiens GN=AHCYL2 PE=1 SV=1	89	66.7	1.148	1.108	1.125	1.152	1.3
Q96HJ9-2	Isoform 2 of UPF0562 protein C7orf55 OS=Homo sapiens GN=C7orf55	10	54.2	1.005	1.145	0.962	0.686	0.746
Q96HH9	GRAM domain-containing protein 3 OS=Homo sapiens GN=GRAMD3 PE=1 SV=1	3	47.8	1.055	0.835	1.111	1.187	1.032
Q96HH6	Transmembrane protein 19 OS=Homo sapiens GN=TMEM19 PE=1 SV=1	2	36.4	0.88	1.124	1.024	1.184	1.047
Q96HE7	ERO1-like protein alpha OS=Homo sapiens GN=ERO1A PE=1 SV=2	9	54.4	0.945	1.065	1.014	1.033	0.999
Q96HD1-2	Isoform 2 of Cysteine-rich with EGF-like domain protein 1 OS=Homo sapiens GN=CRELD1	16	45.9	1.002	1.047	1.132	1.134	1.053
Q96HA1	Nuclear envelope pore membrane protein POM 121 OS=Homo sapiens GN=POM121 PE=1 SV=2	2	127.6	0.86	0.93	0.852	0.826	0.838
Q96H20	Vacuolar-sorting protein SNF8 OS=Homo sapiens GN=SNF8 PE=1 SV=1	4	28.8	0.976	0.972	0.946	0.836	0.861
Q96GZ6	Solute carrier family 41 member 3 OS=Homo sapiens GN=SLC41A3 PE=1 SV=2	2	54.7	0.904	1	0.887	1.253	1.064
Q96GW9	Methionine--tRNA ligase, mitochondrial OS=Homo sapiens GN=MARS2 PE=1 SV=2	2	66.5	1.082	1.105	1.045	0.931	1.017
Q96GW7	Brevican core protein OS=Homo sapiens GN=BCAN PE=1 SV=2	182	99.1	1.085	1.097	1.195	1.302	1.381
Q96GV9	UNC119-binding protein C5orf30 OS=Homo sapiens GN=C5orf30 PE=1 SV=1	2	23.1
Q96GS4	BLOC-1-related complex subunit 6 OS=Homo sapiens GN=BORCS6 PE=1 SV=2	8	37.2	0.977	0.941	1.019	0.956	1.018
Q96GM1-2	Isoform 2 of Phospholipid phosphatase-related protein type 2 OS=Homo sapiens GN=PLPPR2	2	45.5	1.153	1.106	1.216	1.23	1.225
Q96GL9	Protein FAM163A OS=Homo sapiens GN=FAM163A PE=2 SV=1	2	17.6	0.667	1.162	0.7	0.845	0.495
Q96GK7	Fumarylacetoacetate hydrolase domain-containing protein 2A OS=Homo sapiens GN=FAHD2A PE=1 SV=1	34	34.6	1.042	0.955	1.018	1.015	1.001
Q96GG9	DCN1-like protein 1 OS=Homo sapiens GN=DCUN1D1 PE=1 SV=1	10	30.1	0.994	0.956	0.972	1.063	1.132
Q96GF1	E3 ubiquitin-protein ligase RNF185 OS=Homo sapiens GN=RNF185 PE=1 SV=1	6	20.4	0.995	1.109	1.064	0.749	0.96
Q96GD0	Pyridoxal phosphate phosphatase OS=Homo sapiens GN=PDXP PE=1 SV=2	50	31.7	0.992	0.859	0.92	0.92	0.868
Q96GC5	39S ribosomal protein L48, mitochondrial OS=Homo sapiens GN=MRPL48 PE=1 SV=2	2	23.9	0.782	0.86	0.756	0.706	0.712
Q96G28-2	Isoform 2 of Cilia- and flagella-associated protein 36 OS=Homo sapiens GN=CFAP36	6	41.9	0.982	0.905	0.963	0.805	0.854
Q96G25-2	Isoform 2 of Mediator of RNA polymerase II transcription subunit 8 OS=Homo sapiens GN=MED8	2	32.8
Q96G03	Phosphoglucomutase-2 OS=Homo sapiens GN=PGM2 PE=1 SV=4	9	68.2	1.184	1.11	1.196	1.431	1.302
Q96G01	Protein bicaudal D homolog 1 OS=Homo sapiens GN=BICD1 PE=1 SV=3	2	110.7	0.999	1.034	0.933	1.098	1.027
Q96FZ7	Charged multivesicular body protein 6 OS=Homo sapiens GN=CHMP6 PE=1 SV=3	22	23.5	1.17	1.162	1.139	1.181	1.323
Q96FS4	Signal-induced proliferation-associated protein 1 OS=Homo sapiens GN=SIPA1 PE=1 SV=1	6	112.1	1.089	0.902	1.146	1.086	1.116
Q96FQ6	Protein S100-A16 OS=Homo sapiens GN=S100A16 PE=1 SV=1	22	11.8	1.075	1.087	0.996	1.093	1.074
Q96FJ2	Dynein light chain 2, cytoplasmic OS=Homo sapiens GN=DYNLL2 PE=1 SV=1	46	10.3	0.835	0.958	0.9	1.133	1.07
Q96FJ0-2	Isoform 2 of AMSH-like protease OS=Homo sapiens GN=STAMBPL1	4	52.2	0.799	0.861	0.795	0.677	0.567
Q96FH0	BLOC-1-related complex subunit 8 OS=Homo sapiens GN=BORCS8 PE=1 SV=1	3	13.4	1.91	3.18	1.249	3.418	2.486
Q96FE7	Phosphoinositide-3-kinase-interacting protein 1 OS=Homo sapiens GN=PIK3IP1 PE=1 SV=2	2	28.2	1.271	1.478	1.235	1.674	1.573
Q96FE5	Leucine-rich repeat and immunoglobulin-like domain-containing nogo receptor-interacting protein 1 OS=Homo sapiens GN=LINGO1 PE=1 SV=2	32	69.8	0.949	1.04	0.874	0.783	0.754
Q96F88	Processing of 1, ribonuclease P/MRP subunit (S. cerevisiae) OS=Homo sapiens GN=POP1 PE=2 SV=1	2	114.6	1.421	1.213	1.174	1.121	1.225
Q96F85	CB1 cannabinoid receptor-interacting protein 1 OS=Homo sapiens GN=CNRIP1 PE=1 SV=1	42	18.6	0.911	0.84	0.881	0.84	0.818
Q96F07-2	Isoform 2 of Cytoplasmic FMR1-interacting protein 2 OS=Homo sapiens GN=CYFIP2	108	145.6	0.755	0.797	0.771	0.765	0.686
Q96EY7	Pentatricopeptide repeat domain-containing protein 3, mitochondrial OS=Homo sapiens GN=PTCD3 PE=1 SV=3	10	78.5	0.932	0.991	0.941	0.727	0.765
Q96EX1	Small integral membrane protein 12 OS=Homo sapiens GN=SMIM12 PE=1 SV=3	2	10.8	0.738	1.001	0.692	0.719	0.766
Q96ER9	Coiled-coil domain-containing protein 51 OS=Homo sapiens GN=CCDC51 PE=1 SV=2	11	45.8	1.094	0.944	1.078	0.978	1.059
Q96EQ0	Small glutamine-rich tetratricopeptide repeat-containing protein beta OS=Homo sapiens GN=SGTB PE=1 SV=1	14	33.4	1.118	0.851	0.928	0.829	0.862
Q96EM0	Trans-3-hydroxy-L-proline dehydratase OS=Homo sapiens GN=L3HYPDH PE=1 SV=2	5	38.1	0.969	0.854	0.99	1.18	1.43
Q96EL3	39S ribosomal protein L53, mitochondrial OS=Homo sapiens GN=MRPL53 PE=1 SV=1	4	12.1	0.679	1.088	0.769	0.534	0.717
Q96EK6	Glucosamine 6-phosphate N-acetyltransferase OS=Homo sapiens GN=GNPNAT1 PE=1 SV=1	2	20.7	1.233	1.171	1.221	1.046	1.207
Q96EI5-2	Isoform 2 of Transcription elongation factor A protein-like 4 OS=Homo sapiens GN=TCEAL4	2	40.6	1.005	1.008	1.004	1.217	1.138
Q96EE3-1	Isoform B of Nucleoporin SEH1 OS=Homo sapiens GN=SEH1L	9	46.5	1.002	0.981	1.028	1.17	1.113
Q96EB3	EEF1A1 protein (Fragment) OS=Homo sapiens GN=EEF1A1 PE=2 SV=1	38	17	0.931	0.961	0.903	0.963	0.876
Q96E39	RNA binding motif protein, X-linked-like-1 OS=Homo sapiens GN=RBMXL1 PE=1 SV=1	24	42.1	0.757	0.871	0.869	0.928	0.863
Q96E17	Ras-related protein Rab-3C OS=Homo sapiens GN=RAB3C PE=2 SV=1	115	25.9	0.964	0.955	0.945	0.837	0.752
Q96DZ9	CKLF-like MARVEL transmembrane domain-containing protein 5 OS=Homo sapiens GN=CMTM5 PE=1 SV=2	16	24.6	0.945	1.093	0.892	1.056	1.088
Q96DZ5	CAP-Gly domain-containing linker protein 3 OS=Homo sapiens GN=CLIP3 PE=1 SV=3	6	59.5	0.909	1.014	1.072	1.091	1.105
Q96DX7	Tripartite motif-containing protein 44 OS=Homo sapiens GN=TRIM44 PE=1 SV=1	2	38.4	0.59	0.802	0.82	0.912	0.775
Q96DV4	39S ribosomal protein L38, mitochondrial OS=Homo sapiens GN=MRPL38 PE=1 SV=2	2	44.6	1.26	1.264	1.171	0.941	1.175
Q96DP0	cDNA FLJ31479 fis, clone NT2NE2001634, moderately similar to NADH-UBIQUINONE OXIDOREDUCTASE 9 KD SUBUNIT (EC 1.6.5.3) OS=Homo sapiens PE=2 SV=1	29	49.2	0.762	0.78	0.813	0.787	0.662
Q96DM3	Uncharacterized protein C18orf8 OS=Homo sapiens GN=C18orf8 PE=1 SV=2	8	74.9	0.885	0.974	0.911	0.909	0.893
Q96DI7-2	Isoform 2 of U5 small nuclear ribonucleoprotein 40 kDa protein OS=Homo sapiens GN=SNRNP40	2	44.5	0.889	0.896	0.814	0.721	0.75
Q96DH6	RNA-binding protein Musashi homolog 2 OS=Homo sapiens GN=MSI2 PE=1 SV=1	3	35.2	0.841	0.883	0.913	0.867	0.88
Q96DG6	Carboxymethylenebutenolidase homolog OS=Homo sapiens GN=CMBL PE=1 SV=1	12	28	0.683	0.793	1.06	1.665	1.06
Q96DE0	U8 snoRNA-decapping enzyme OS=Homo sapiens GN=NUDT16 PE=1 SV=2	12	21.3	0.918	0.886	0.866	1.013	0.995
Q96DD7	Protein shisa-4 OS=Homo sapiens GN=SHISA4 PE=2 SV=3	4	21.5	1.077	0.977	1.066	1.232	1.038
Q96DB5	Regulator of microtubule dynamics protein 1 OS=Homo sapiens GN=RMDN1 PE=1 SV=1	8	35.8	0.923	1.009	0.952	1.034	1.026
Q96DA6	Mitochondrial import inner membrane translocase subunit TIM14 OS=Homo sapiens GN=DNAJC19 PE=1 SV=3	20	12.5	1.309	1.311	1.021	0.872	0.925
Q96DA2	Ras-related protein Rab-39B OS=Homo sapiens GN=RAB39B PE=1 SV=1	43	24.6	0.956	0.911	0.899	0.847	0.756
Q96D71	RalBP1-associated Eps domain-containing protein 1 OS=Homo sapiens GN=REPS1 PE=1 SV=3	16	86.6	1.116	0.952	1.027	0.855	0.88
Q96D05-2	Isoform 2 of Uncharacterized protein C10orf35 OS=Homo sapiens GN=C10orf35	17	17.5	1.19	1.132	1.078	1.077	0.964
Q96CW9	Netrin-G2 OS=Homo sapiens GN=NTNG2 PE=1 SV=2	3	59.8	1.322	1.043	1.135	0.959	1.006
Q96CW5	Gamma-tubulin complex component 3 OS=Homo sapiens GN=TUBGCP3 PE=1 SV=2	4	103.5	0.799	0.976	1	1.25	1.07
Q96CU9	FAD-dependent oxidoreductase domain-containing protein 1 OS=Homo sapiens GN=FOXRED1 PE=1 SV=2	4	53.8	0.892	0.723	0.73	0.598	0.476
Q96CT7	Coiled-coil domain-containing protein 124 OS=Homo sapiens GN=CCDC124 PE=1 SV=1	16	25.8	1.064	1.046	0.937	0.837	1.04
Q96CS3	FAS-associated factor 2 OS=Homo sapiens GN=FAF2 PE=1 SV=2	27	52.6	0.863	0.99	0.912	0.853	0.757
Q96CQ1	Solute carrier family 25 member 36 OS=Homo sapiens GN=SLC25A36 PE=1 SV=1	4	34.3	0.813	1.011	0.762	0.844	0.857
Q96CN7	Isochorismatase domain-containing protein 1 OS=Homo sapiens GN=ISOC1 PE=1 SV=3	12	32.2	1.229	1.059	1.13	1.195	1.265
Q96CN4-2	Isoform 2 of EVI5-like protein OS=Homo sapiens GN=EVI5L	6	92.5	0.789	0.864	0.791	0.733	0.754
Q96CM8-2	Isoform 2 of Acyl-CoA synthetase family member 2, mitochondrial OS=Homo sapiens GN=ACSF2	2	70.6	0.727	0.949	0.777	0.799	0.762
Q96C86	m7GpppX diphosphatase OS=Homo sapiens GN=DCPS PE=1 SV=2	8	38.6	0.871	0.941	0.914	1.061	0.927
Q96C23	Aldose 1-epimerase OS=Homo sapiens GN=GALM PE=1 SV=1	6	37.7	1.179	1.161	1.313	1.3	1.366
Q96C19	EF-hand domain-containing protein D2 OS=Homo sapiens GN=EFHD2 PE=1 SV=1	68	26.7	1.068	0.974	1.067	0.899	0.964
Q96BZ9-3	Isoform 3 of TBC1 domain family member 20 OS=Homo sapiens GN=TBC1D20	2	48.4	0.314	0.623	0.274	0.179	0.216
Q96BZ8	Leukocyte receptor cluster member 1 OS=Homo sapiens GN=LENG1 PE=1 SV=1	3	30.5	1.083	1.123	1.083	1.018	1.235
Q96BY7	Autophagy-related protein 2 homolog B OS=Homo sapiens GN=ATG2B PE=1 SV=5	2	232.6	0.798	0.907	0.723	0.67	0.641
Q96BY6	Dedicator of cytokinesis protein 10 OS=Homo sapiens GN=DOCK10 PE=1 SV=3	18	249.4	1.093	1.12	1.022	1.098	1.211
Q96BY2	Modulator of apoptosis 1 OS=Homo sapiens GN=MOAP1 PE=1 SV=1	4	39.5	0.888	0.811	0.84	0.888	0.806
Q96BX8	MOB kinase activator 3A OS=Homo sapiens GN=MOB3A PE=1 SV=1	4	25.4	1.313	0.858	0.936	0.936	0.962
Q96BW9	Phosphatidate cytidylyltransferase, mitochondrial OS=Homo sapiens GN=TAMM41 PE=1 SV=2	2	51	1.008	1.191	1.069	0.819	0.939
Q96BW5	Phosphotriesterase-related protein OS=Homo sapiens GN=PTER PE=1 SV=1	2	39	0.786	0.812	0.915	1.418	0.867
Q96BW1	Uracil phosphoribosyltransferase homolog OS=Homo sapiens GN=UPRT PE=1 SV=1	2	33.8	1.066	1.049	1.193	1.209	1.257
Q96BS2	Calcineurin B homologous protein 3 OS=Homo sapiens GN=TESC PE=1 SV=3	15	24.7	1.002	1.258	0.925	0.835	0.935
Q96BR5	Cytochrome c oxidase assembly factor 7 OS=Homo sapiens GN=COA7 PE=1 SV=2	6	25.7	1.326	1.049	1.174	0.913	1.019
Q96BQ5	Coiled-coil domain-containing protein 127 OS=Homo sapiens GN=CCDC127 PE=1 SV=1	7	30.8	0.991	0.941	0.923	0.849	0.849
Q96BN8	Ubiquitin thioesterase otulin OS=Homo sapiens GN=OTULIN PE=1 SV=3	2	40.2	0.675	0.507	0.485	0.55	0.462
Q96BM9	ADP-ribosylation factor-like protein 8A OS=Homo sapiens GN=ARL8A PE=1 SV=1	28	21.4	1.282	1.049	1.157	0.99	1.279
Q96BK5	PIN2/TERF1-interacting telomerase inhibitor 1 OS=Homo sapiens GN=PINX1 PE=1 SV=2	2	37	1.658	1.465	1.499	1.358	1.632
Q96BJ3	Axin interactor, dorsalization-associated protein OS=Homo sapiens GN=AIDA PE=1 SV=1	7	35	1.009	0.915	1.018	1.005	0.933
Q96BH1	E3 ubiquitin-protein ligase RNF25 OS=Homo sapiens GN=RNF25 PE=1 SV=1	2	51.2	1.215	1.27	1.426	1.392	1.435
Q96BF6	Nucleus accumbens-associated protein 2 OS=Homo sapiens GN=NACC2 PE=1 SV=1	2	62.8	0.956	0.938	1.029	1.024	0.926
Q96BE0	Putative uncharacterized protein (Fragment) OS=Homo sapiens PE=1 SV=1	181	29.3	0.841	1.02	1.063	1.926	1.738
Q96B97	SH3 domain-containing kinase-binding protein 1 OS=Homo sapiens GN=SH3KBP1 PE=1 SV=2	42	73.1	0.989	1.044	0.936	0.953	1.029
Q96B49	Mitochondrial import receptor subunit TOM6 homolog OS=Homo sapiens GN=TOMM6 PE=1 SV=1	6	8	1.219	1.351	1.133	1.118	1.211
Q96B36-3	Isoform 3 of Proline-rich AKT1 substrate 1 OS=Homo sapiens GN=AKT1S1	5	29.2	0.959	0.88	0.873	0.828	0.912
Q96AX2-2	Isoform 2 of Ras-related protein Rab-37 OS=Homo sapiens GN=RAB37	42	24.2	1.029	1.081	1.087	1.075	1.112
Q96AT9	Ribulose-phosphate 3-epimerase OS=Homo sapiens GN=RPE PE=1 SV=1	6	24.9	1.042	1.016	1.257	1.418	1.71
Q96AQ8	Mitochondrial calcium uniporter regulator 1 OS=Homo sapiens GN=MCUR1 PE=1 SV=1	2	39.7	0.956	1.296	1.435	1.624	1.077
Q96AQ6	Pre-B-cell leukemia transcription factor-interacting protein 1 OS=Homo sapiens GN=PBXIP1 PE=1 SV=1	75	80.6	1.086	1.036	1.131	1.414	1.281
Q96AN5	Transmembrane protein 143 OS=Homo sapiens GN=TMEM143 PE=2 SV=1	6	51.7	0.934	1.024	0.87	0.82	0.817
Q96AJ9	Vesicle transport through interaction with t-SNAREs homolog 1A OS=Homo sapiens GN=VTI1A PE=1 SV=2	4	25.2	1.324	1.27	1.286	1.079	1.079
Q96AG4	Leucine-rich repeat-containing protein 59 OS=Homo sapiens GN=LRRC59 PE=1 SV=1	31	34.9	0.867	0.942	0.869	0.937	0.92
Q96AG3	Solute carrier family 25 member 46 OS=Homo sapiens GN=SLC25A46 PE=1 SV=1	8	46.1	0.919	1.078	0.956	0.967	1.23
Q96AE4-2	Isoform 2 of Far upstream element-binding protein 1 OS=Homo sapiens GN=FUBP1	21	68.6
Q96AC6	Kinesin-like protein KIFC2 OS=Homo sapiens GN=KIFC2 PE=2 SV=1	2	90.1	1.078	1.297	1.335	2.045	1.741
Q96AB3-2	Isoform 2 of Isochorismatase domain-containing protein 2 OS=Homo sapiens GN=ISOC2	32	24.1	0.777	0.871	0.816	0.824	0.808
Q96AA8-3	Isoform 3 of Janus kinase and microtubule-interacting protein 2 OS=Homo sapiens GN=JAKMIP2	12	96.2	0.961	1.097	1.083	1.02	0.959
Q96A84-3	Isoform 3 of EMI domain-containing protein 1 OS=Homo sapiens GN=EMID1	2	45.4	0.929	0.801	0.881	0.981	0.844
Q96A73	Putative monooxygenase p33MONOX OS=Homo sapiens GN=KIAA1191 PE=1 SV=1	4	33.2	0.885	1.019	0.841	0.785	0.857
Q96A57-2	Isoform 1 of Transmembrane protein 230 OS=Homo sapiens GN=TMEM230	8	19.9	1.098	1.187	1.063	0.972	1.034
Q96A35	39S ribosomal protein L24, mitochondrial OS=Homo sapiens GN=MRPL24 PE=1 SV=1	2	24.9
Q96A33	Coiled-coil domain-containing protein 47 OS=Homo sapiens GN=CCDC47 PE=1 SV=1	10	55.8	0.987	0.98	0.955	1.018	1.133
Q96A26	Protein FAM162A OS=Homo sapiens GN=FAM162A PE=1 SV=2	36	17.3	1.018	1.18	0.922	0.842	0.864
Q96A23-2	Isoform 2 of Copine-4 OS=Homo sapiens GN=CPNE4	31	64.4	0.905	0.973	1.045	1.023	1.046
Q96A00	Protein phosphatase 1 regulatory subunit 14A OS=Homo sapiens GN=PPP1R14A PE=1 SV=1	12	16.7	0.898	0.857	0.986	1.222	1.6
Q969Z3	Mitochondrial amidoxime reducing component 2 OS=Homo sapiens GN=MARC2 PE=1 SV=1	15	38	1.034	1.118	1.03	0.909	0.89
Q969Y2-2	Isoform 2 of tRNA modification GTPase GTPBP3, mitochondrial OS=Homo sapiens GN=GTPBP3	4	55.5	0.83	0.896	0.798	0.886	1.027
Q969X5	Endoplasmic reticulum-Golgi intermediate compartment protein 1 OS=Homo sapiens GN=ERGIC1 PE=1 SV=1	14	32.6	0.98	1.081	1.009	1.089	0.966
Q969V5	Mitochondrial ubiquitin ligase activator of NFKB 1 OS=Homo sapiens GN=MUL1 PE=1 SV=1	2	39.8	1.552	1.692	1.379	1.131	1.303
Q969V3	Nicalin OS=Homo sapiens GN=NCLN PE=1 SV=2	12	62.9	1.057	1.142	0.925	0.794	0.879
Q969T4	Ubiquitin-conjugating enzyme E2 E3 OS=Homo sapiens GN=UBE2E3 PE=1 SV=1	4	22.9	0.897	0.419	0.744	0.502	0.508
Q969S2	Endonuclease 8-like 2 OS=Homo sapiens GN=NEIL2 PE=1 SV=3	2	36.8	1.028	1.033	1.131	1.041	0.905
Q969R2	Oxysterol-binding protein 2 OS=Homo sapiens GN=OSBP2 PE=1 SV=2	8	101.2	1.289	1.303	1.062	0.851	0.966
Q969Q5	Ras-related protein Rab-24 OS=Homo sapiens GN=RAB24 PE=1 SV=1	6	23.1	0.964	1.044	0.932	0.829	0.758
Q969P0	Immunoglobulin superfamily member 8 OS=Homo sapiens GN=IGSF8 PE=1 SV=1	107	65	1.168	1.13	1.079	1.026	1.092
Q969N2	GPI transamidase component PIG-T OS=Homo sapiens GN=PIGT PE=1 SV=1	2	65.7	1.08	1.107	1.015	1.124	1.089
Q969M7-2	Isoform 2 of NEDD8-conjugating enzyme UBE2F OS=Homo sapiens GN=UBE2F	2	23.7
Q969M3-3	Isoform 3 of Protein YIPF5 OS=Homo sapiens GN=YIPF5	2	29.1	0.924	1.253	1.082	0.962	1.204
Q969M1	Mitochondrial import receptor subunit TOM40B OS=Homo sapiens GN=TOMM40L PE=1 SV=1	8	33.9	0.732	0.705	0.553	0.62	0.505
Q969J5	Interleukin-22 receptor subunit alpha-2 OS=Homo sapiens GN=IL22RA2 PE=1 SV=1	2	30.5
Q969J3	BLOC-1-related complex subunit 5 OS=Homo sapiens GN=BORCS5 PE=1 SV=1	14	22.2	1.086	1.119	1.031	1.011	1.019
Q969H8	Myeloid-derived growth factor OS=Homo sapiens GN=MYDGF PE=1 SV=1	6	18.8	0.782	0.85	0.744	0.966	0.93
Q969E8	Pre-rRNA-processing protein TSR2 homolog OS=Homo sapiens GN=TSR2 PE=1 SV=1	6	20.9	0.667	0.833	0.831	0.821	0.828
Q969E4	Transcription elongation factor A protein-like 3 OS=Homo sapiens GN=TCEAL3 PE=1 SV=1	36	22.5	0.799	1.095	1.114	1.322	1.232
Q969E2	Secretory carrier-associated membrane protein 4 OS=Homo sapiens GN=SCAMP4 PE=1 SV=1	12	25.7	1.015	1.215	0.984	1.078	1.081
Q93100-3	Isoform 3 of Phosphorylase b kinase regulatory subunit beta OS=Homo sapiens GN=PHKB	16	124.7	1.006	1.068	1.006	0.928	0.929
Q93050	V-type proton ATPase 116 kDa subunit a isoform 1 OS=Homo sapiens GN=ATP6V0A1 PE=1 SV=3	187	96.4	1.111	1.07	0.989	0.856	0.8
Q93045-2	Isoform 2 of Stathmin-2 OS=Homo sapiens GN=STMN2	79	21.8	1.029	0.974	0.853	0.618	0.778
Q93034	Cullin-5 OS=Homo sapiens GN=CUL5 PE=1 SV=4	42	90.9	0.974	0.949	0.993	1.041	1.115
Q93009	Ubiquitin carboxyl-terminal hydrolase 7 OS=Homo sapiens GN=USP7 PE=1 SV=2	65	128.2	0.88	0.912	0.908	0.769	0.767
Q93008	Probable ubiquitin carboxyl-terminal hydrolase FAF-X OS=Homo sapiens GN=USP9X PE=1 SV=3	64	292.1	0.769	0.821	0.831	0.791	0.737
Q92982	Ninjurin-1 OS=Homo sapiens GN=NINJ1 PE=1 SV=2	4	16.3	1.141	1.179	1.22	1.261	1.131
Q92963-3	Isoform 3 of GTP-binding protein Rit1 OS=Homo sapiens GN=RIT1	2	27.1
Q92953	Potassium voltage-gated channel subfamily B member 2 OS=Homo sapiens GN=KCNB2 PE=2 SV=2	2	102.5	0.928	1.086	0.77	0.629	0.643
Q92934	Bcl2-associated agonist of cell death OS=Homo sapiens GN=BAD PE=1 SV=3	4	18.4	0.853	0.947	0.86	0.91	0.911
Q92932	Receptor-type tyrosine-protein phosphatase N2 OS=Homo sapiens GN=PTPRN2 PE=1 SV=2	43	111.2	1.017	0.926	0.979	0.889	0.774
Q92930	Ras-related protein Rab-8B OS=Homo sapiens GN=RAB8B PE=1 SV=2	85	23.6	1.232	1.131	1.179	1.049	1.178
Q92905	COP9 signalosome complex subunit 5 OS=Homo sapiens GN=COPS5 PE=1 SV=4	23	37.6	0.935	0.876	0.952	1.139	1.085
Q92900	Regulator of nonsense transcripts 1 OS=Homo sapiens GN=UPF1 PE=1 SV=2	38	124.3	1.032	1.02	1	0.908	0.876
Q92896-2	Isoform 2 of Golgi apparatus protein 1 OS=Homo sapiens GN=GLG1	27	137.1	0.983	1.167	1.061	1.078	1.084
Q92890-1	Isoform Long of Ubiquitin fusion degradation protein 1 homolog OS=Homo sapiens GN=UFD1L	7	38.7	0.831	0.881	0.874	0.899	0.923
Q92889	DNA repair endonuclease XPF OS=Homo sapiens GN=ERCC4 PE=1 SV=3	2	104.4	0.935	0.917	1.169	1.67	1.997
Q92878-2	Isoform 2 of DNA repair protein RAD50 OS=Homo sapiens GN=RAD50	5	154.5	0.521	0.691	0.61	0.622	0.495
Q92859	Neogenin OS=Homo sapiens GN=NEO1 PE=1 SV=2	41	159.9	0.994	1.04	1.011	1.074	1.135
Q92845	Kinesin-associated protein 3 OS=Homo sapiens GN=KIFAP3 PE=1 SV=2	18	91.1	0.89	0.932	0.933	0.963	0.769
Q92843-2	Isoform 3 of Bcl-2-like protein 2 OS=Homo sapiens GN=BCL2L2	6	37.1	0.855	0.878	0.974	0.762	0.797
Q92835	Phosphatidylinositol 3,4,5-trisphosphate 5-phosphatase 1 OS=Homo sapiens GN=INPP5D PE=1 SV=2	2	133.2	2.193	3.844	3.994	3.792	1.765
Q92823-5	Isoform 5 of Neuronal cell adhesion molecule OS=Homo sapiens GN=NRCAM	241	144.3	1.063	1.009	0.985	1.004	1.01
Q92806	G protein-activated inward rectifier potassium channel 3 OS=Homo sapiens GN=KCNJ9 PE=2 SV=2	4	44	0.683	0.854	0.849	0.657	0.699
Q92804	TATA-binding protein-associated factor 2N OS=Homo sapiens GN=TAF15 PE=1 SV=1	31	61.8	0.903	1.037	0.993	0.99	1.05
Q92783	Signal transducing adapter molecule 1 OS=Homo sapiens GN=STAM PE=1 SV=3	39	59.1	0.803	0.852	0.716	0.708	0.739
Q92769	Histone deacetylase 2 OS=Homo sapiens GN=HDAC2 PE=1 SV=2	11	55.3	0.797	0.88	0.895	0.862	0.737
Q92747	Actin-related protein 2/3 complex subunit 1A OS=Homo sapiens GN=ARPC1A PE=1 SV=2	36	41.5	0.811	0.853	0.863	0.891	0.846
Q92743	Serine protease HTRA1 OS=Homo sapiens GN=HTRA1 PE=1 SV=1	10	51.3	0.983	0.968	1.147	1.495	1.226
Q92736-2	Isoform 2 of Ryanodine receptor 2 OS=Homo sapiens GN=RYR2	166	565.1	0.895	0.975	0.947	0.913	0.825
Q92696	Geranylgeranyl transferase type-2 subunit alpha OS=Homo sapiens GN=RABGGTA PE=1 SV=2	18	65	0.958	0.904	0.967	0.879	0.867
Q92692-2	Isoform Alpha of Nectin-2 OS=Homo sapiens GN=NECTIN2	6	51.3
Q92692	Nectin-2 OS=Homo sapiens GN=NECTIN2 PE=1 SV=1	6	57.7	0.907	1.004	1.045	1.239	1.022
Q92688	Acidic leucine-rich nuclear phosphoprotein 32 family member B OS=Homo sapiens GN=ANP32B PE=1 SV=1	16	28.8	1.271	1.289	1.265	1.494	1.629
Q92665	28S ribosomal protein S31, mitochondrial OS=Homo sapiens GN=MRPS31 PE=1 SV=3	6	45.3	0.843	0.92	0.805	0.704	0.664
Q92643	GPI-anchor transamidase OS=Homo sapiens GN=PIGK PE=1 SV=2	2	45.2	1.172	1.401	1.282	1.9	1.067
Q92629-2	Isoform 2 of Delta-sarcoglycan OS=Homo sapiens GN=SGCD	6	32.2	1.253	1.015	1.136	1.214	1.3
Q92623	Tetratricopeptide repeat protein 9A OS=Homo sapiens GN=TTC9 PE=1 SV=3	8	24.4	1.173	1.185	1.113	1.394	1.301
Q92621	Nuclear pore complex protein Nup205 OS=Homo sapiens GN=NUP205 PE=1 SV=3	12	227.8	1.295	1.125	1.086	0.997	1.052
Q92615	La-related protein 4B OS=Homo sapiens GN=LARP4B PE=1 SV=3	2	80.5	0.853	0.894	0.937	0.825	0.912
Q92614	Unconventional myosin-XVIIIa OS=Homo sapiens GN=MYO18A PE=1 SV=3	97	233	0.932	0.983	0.882	0.849	0.809
Q92609-2	Isoform 2 of TBC1 domain family member 5 OS=Homo sapiens GN=TBC1D5	14	91.2	0.853	0.893	0.866	0.881	0.861
Q92604	Acyl-CoA:lysophosphatidylglycerol acyltransferase 1 OS=Homo sapiens GN=LPGAT1 PE=1 SV=1	2	43.1	0.891	0.916	0.829	0.736	0.587
Q92599-4	Isoform 4 of Septin-8 OS=Homo sapiens GN=SEPT8	122	51.1	0.817	1.141	1.1	1.015	0.907
Q92599	Septin-8 OS=Homo sapiens GN=SEPT8 PE=1 SV=4	122	55.7	0.788	0.865	0.83	1.07	0.925
Q92598-4	Isoform 4 of Heat shock protein 105 kDa OS=Homo sapiens GN=HSPH1	165	97.4	0.973	0.921	1.103	1.24	1.247
Q92581-3	Isoform 3 of Sodium/hydrogen exchanger 6 OS=Homo sapiens GN=SLC9A6	37	72.2
Q92581-2	Isoform 2 of Sodium/hydrogen exchanger 6 OS=Homo sapiens GN=SLC9A6	41	77.9	0.873	0.932	0.9	0.84	0.788
Q92575	UBX domain-containing protein 4 OS=Homo sapiens GN=UBXN4 PE=1 SV=2	4	56.7	1.177	1.152	1.147	0.971	1.158
Q92561	Phytanoyl-CoA hydroxylase-interacting protein OS=Homo sapiens GN=PHYHIP PE=1 SV=1	23	37.5	0.868	0.863	0.906	0.845	0.776
Q92558	Wiskott-Aldrich syndrome protein family member 1 OS=Homo sapiens GN=WASF1 PE=1 SV=1	53	61.6	0.987	0.899	0.941	0.817	0.745
Q92556	Engulfment and cell motility protein 1 OS=Homo sapiens GN=ELMO1 PE=1 SV=2	22	83.8	1.092	1.125	1.087	1.116	1.419
Q92552-2	Isoform 2 of 28S ribosomal protein S27, mitochondrial OS=Homo sapiens GN=MRPS27	16	49.1	0.93	0.987	1.022	0.87	0.828
Q92551	Inositol hexakisphosphate kinase 1 OS=Homo sapiens GN=IP6K1 PE=1 SV=3	4	50.2	0.799	0.815	0.847	0.848	0.783
Q92542	Nicastrin OS=Homo sapiens GN=NCSTN PE=1 SV=2	14	78.4	1.003	1.088	0.908	0.911	0.928
Q92541	RNA polymerase-associated protein RTF1 homolog OS=Homo sapiens GN=RTF1 PE=1 SV=4	1	80.3	0.961	0.771	0.967	0.908	1.078
Q92538	Golgi-specific brefeldin A-resistance guanine nucleotide exchange factor 1 OS=Homo sapiens GN=GBF1 PE=1 SV=2	16	206.3	0.905	0.86	0.838	0.762	0.744
Q92529	SHC-transforming protein 3 OS=Homo sapiens GN=SHC3 PE=1 SV=1	15	64	0.909	0.933	0.918	0.828	0.86
Q92522	Histone H1x OS=Homo sapiens GN=H1FX PE=1 SV=1	26	22.5	1.243	1.093	1.126	1.268	1.163
Q92520	Protein FAM3C OS=Homo sapiens GN=FAM3C PE=1 SV=1	14	24.7	1.067	1.24	1.132	1.078	1.012
Q92506	Estradiol 17-beta-dehydrogenase 8 OS=Homo sapiens GN=HSD17B8 PE=1 SV=2	14	27	0.901	1.012	0.894	0.934	0.891
Q92499	ATP-dependent RNA helicase DDX1 OS=Homo sapiens GN=DDX1 PE=1 SV=2	62	82.4	0.816	0.847	0.829	0.751	0.737
Q8WZA9	Immunity-related GTPase family Q protein OS=Homo sapiens GN=IRGQ PE=1 SV=1	43	62.7	0.913	0.912	0.86	0.788	0.885
Q8WZA2	Rap guanine nucleotide exchange factor 4 OS=Homo sapiens GN=RAPGEF4 PE=1 SV=1	14	115.4	0.82	0.963	0.848	0.719	0.616
Q8WZA0-2	Isoform 2 of Protein LZIC OS=Homo sapiens GN=LZIC	24	23.9	0.921	0.934	0.975	1.358	1.241
Q8WZ64	Arf-GAP with Rho-GAP domain, ANK repeat and PH domain-containing protein 2 OS=Homo sapiens GN=ARAP2 PE=1 SV=3	2	193.3	1.01	1.075	0.937	0.882	1.08
Q8WYQ9-2	Isoform 2 of Zinc finger CCHC domain-containing protein 14 OS=Homo sapiens GN=ZCCHC14	3	101.5	0.621	0.683	0.637	0.67	0.498
Q8WYP5-2	Isoform 2 of Protein ELYS OS=Homo sapiens GN=AHCTF1	2	255.8	0.918	0.955	1.004	0.825	0.866
Q8WYK1	Contactin-associated protein-like 5 OS=Homo sapiens GN=CNTNAP5 PE=2 SV=1	12	145.5	0.951	1.026	1.003	1.043	0.9
Q8WY54	Protein phosphatase 1E OS=Homo sapiens GN=PPM1E PE=1 SV=2	9	84.9	0.686	0.784	0.776	0.693	0.672
Q8WY22	BRI3-binding protein OS=Homo sapiens GN=BRI3BP PE=1 SV=1	10	27.8	0.753	0.984	0.803	0.668	0.58
Q8WY21-2	Isoform 2 of VPS10 domain-containing receptor SorCS1 OS=Homo sapiens GN=SORCS1	4	133.3	0.323	0.48	0.387	0.516	0.368
Q8WXX5	DnaJ homolog subfamily C member 9 OS=Homo sapiens GN=DNAJC9 PE=1 SV=1	4	29.9	1.086	1.127	1.19	1.601	1.344
Q8WXS5	Voltage-dependent calcium channel gamma-8 subunit OS=Homo sapiens GN=CACNG8 PE=2 SV=3	14	43.3	0.944	0.803	0.818	0.631	0.77
Q8WXS3	Brain and acute leukemia cytoplasmic protein OS=Homo sapiens GN=BAALC PE=2 SV=3	10	19.2	1.654	1.097	1.169	0.988	1.12
Q8WXI2	Connector enhancer of kinase suppressor of ras 2 OS=Homo sapiens GN=CNKSR2 PE=1 SV=1	10	117.5	0.814	0.813	0.915	0.824	0.685
Q8WXH2	Junctophilin-3 OS=Homo sapiens GN=JPH3 PE=2 SV=2	2	81.4	0.918	0.999	0.901	1.019	0.947
Q8WXG6-4	Isoform 4 of MAP kinase-activating death domain protein OS=Homo sapiens GN=MADD	58	173.3	1.008	1.005	0.876	0.844	0.678
Q8WXG6	MAP kinase-activating death domain protein OS=Homo sapiens GN=MADD PE=1 SV=2	60	183.2	0.836	0.897	0.813	0.778	0.693
Q8WXF1	Paraspeckle component 1 OS=Homo sapiens GN=PSPC1 PE=1 SV=1	28	58.7	0.838	0.946	0.875	0.751	0.678
Q8WXF0	Serine/arginine-rich splicing factor 12 OS=Homo sapiens GN=SRSF12 PE=2 SV=1	2	30.5	0.822	0.775	0.823	0.63	0.609
Q8WXE9-3	Isoform 2 of Stonin-2 OS=Homo sapiens GN=STON2	6	102.8	1.197	0.933	1.069	1.14	1.009
Q8WXE0	Caskin-2 OS=Homo sapiens GN=CASKIN2 PE=1 SV=2	8	126.7	0.854	0.538	0.612	0.629	0.257
Q8WXD9	Caskin-1 OS=Homo sapiens GN=CASKIN1 PE=1 SV=1	76	149.7	0.922	0.947	0.885	0.774	0.723
Q8WXD2	Secretogranin-3 OS=Homo sapiens GN=SCG3 PE=1 SV=3	26	53	1.253	1.152	1.194	1.02	0.931
Q8WXA9-2	Isoform 2 of Splicing regulatory glutamine/lysine-rich protein 1 OS=Homo sapiens GN=SREK1	2	71.6
Q8WXA3	RUN and FYVE domain-containing protein 2 OS=Homo sapiens GN=RUFY2 PE=1 SV=2	14	75	0.976	0.945	0.866	0.846	0.788
Q8WX93	Palladin OS=Homo sapiens GN=PALLD PE=1 SV=3	6	150.5	1.072	0.912	1.12	1.665	1.394
Q8WWZ7	ATP-binding cassette sub-family A member 5 OS=Homo sapiens GN=ABCA5 PE=2 SV=2	3	186.4
Q8WWX9	Selenoprotein M OS=Homo sapiens GN=SELM PE=1 SV=3	6	16.2	0.993	0.977	0.988	1.117	1.016
Q8WWX8-4	Isoform 4 of Sodium/myo-inositol cotransporter 2 OS=Homo sapiens GN=SLC5A11	2	81.4
Q8WWV3	Reticulon-4-interacting protein 1, mitochondrial OS=Homo sapiens GN=RTN4IP1 PE=1 SV=2	13	43.6	1.021	0.935	0.938	0.819	0.863
Q8WWM7-3	Isoform 3 of Ataxin-2-like protein OS=Homo sapiens GN=ATXN2L	19	115.5	0.955	0.999	0.916	0.824	0.907
Q8WWI5	Choline transporter-like protein 1 OS=Homo sapiens GN=SLC44A1 PE=1 SV=1	44	73.3	1.207	1.186	1.196	1.186	1.559
Q8WWI1	LIM domain only protein 7 OS=Homo sapiens GN=LMO7 PE=1 SV=3	50	192.6	0.903	0.976	0.8	0.701	0.646
Q8WWC4	m-AAA protease-interacting protein 1, mitochondrial OS=Homo sapiens GN=C2orf47 PE=1 SV=1	6	32.5	0.729	0.933	0.783	0.727	0.713
Q8WW59	SPRY domain-containing protein 4 OS=Homo sapiens GN=SPRYD4 PE=1 SV=2	4	23.1	0.954	0.9	1.142	1.412	1.135
Q8WW22-2	Isoform 2 of DnaJ homolog subfamily A member 4 OS=Homo sapiens GN=DNAJA4	22	47.9	1.182	1.063	1.191	1.056	1.068
Q8WW12	PEST proteolytic signal-containing nuclear protein OS=Homo sapiens GN=PCNP PE=1 SV=2	6	18.9	0.953	1.008	0.951	0.919	1.148
Q8WW01	tRNA-splicing endonuclease subunit Sen15 OS=Homo sapiens GN=TSEN15 PE=1 SV=1	2	18.6	1.45	1.047	1.559	1.58	1.372
Q8WVY7	Ubiquitin-like domain-containing CTD phosphatase 1 OS=Homo sapiens GN=UBLCP1 PE=1 SV=2	8	36.8	0.534	0.645	0.663	0.676	0.53
Q8WVX7	Ribosomal protein S19 (Fragment) OS=Homo sapiens PE=2 SV=1	50	17.3	1.154	1.191	1.072	0.957	1.064
Q8WVT3	Trafficking protein particle complex subunit 12 OS=Homo sapiens GN=TRAPPC12 PE=1 SV=3	4	79.3	1.177	1.089	1.171	0.965	1.23
Q8WVJ2	NudC domain-containing protein 2 OS=Homo sapiens GN=NUDCD2 PE=1 SV=1	2	17.7	1.2	1.104	1.45	1.561	1.287
Q8WVH0	Complexin-3 OS=Homo sapiens GN=CPLX3 PE=2 SV=1	6	17.5	1.196	1.144	1.071	1.406	1.137
Q8WVF5	BTB/POZ domain-containing protein KCTD4 OS=Homo sapiens GN=KCTD4 PE=2 SV=2	4	29.9	0.636	0.772	0.702	0.681	0.734
Q8WVF1	Protein OSCP1 OS=Homo sapiens GN=OSCP1 PE=1 SV=4	6	44.6	0.882	0.799	0.839	0.733	0.77
Q8WVC6	Dephospho-CoA kinase domain-containing protein OS=Homo sapiens GN=DCAKD PE=1 SV=1	2	26.5	0.81	0.818	0.829	0.681	0.762
Q8WV41	Sorting nexin-33 OS=Homo sapiens GN=SNX33 PE=1 SV=1	2	65.2	0.901	1.031	1.065	1.067	1.012
Q8WUY8	N-acetyltransferase 14 OS=Homo sapiens GN=NAT14 PE=1 SV=1	2	21.6
Q8WUY3-3	Isoform 3 of Protein prune homolog 2 OS=Homo sapiens GN=PRUNE2	20	340.9	1.004	1.01	0.935	0.864	0.979
Q8WUY1	Protein THEM6 OS=Homo sapiens GN=THEM6 PE=1 SV=2	8	23.9	1.043	1.149	1.034	1.011	1.104
Q8WUW1-2	Isoform 2 of Protein BRICK1 OS=Homo sapiens GN=BRK1	20	12	1.177	1.092	1.073	0.926	0.894
Q8WUR7	UPF0235 protein C15orf40 OS=Homo sapiens GN=C15orf40 PE=1 SV=2	4	16.3	0.833	0.945	0.917	1.026	0.985
Q8WUN7	Ubiquitin domain-containing protein 2 OS=Homo sapiens GN=UBTD2 PE=1 SV=2	6	26.2	0.924	0.99	0.964	1.067	1.031
Q8WUM0	Nuclear pore complex protein Nup133 OS=Homo sapiens GN=NUP133 PE=1 SV=2	8	128.9	0.972	1.016	0.983	0.835	0.846
Q8WUK0	Phosphatidylglycerophosphatase and protein-tyrosine phosphatase 1 OS=Homo sapiens GN=PTPMT1 PE=1 SV=1	6	22.8	0.893	0.952	0.924	0.803	0.722
Q8WUH6	Transmembrane protein 263 OS=Homo sapiens GN=TMEM263 PE=1 SV=1	2	11.7	0.991	0.715	0.799	0.672	0.774
Q8WUH2	Transforming growth factor-beta receptor-associated protein 1 OS=Homo sapiens GN=TGFBRAP1 PE=1 SV=1	2	97.1
Q8WUD1	Ras-related protein Rab-2B OS=Homo sapiens GN=RAB2B PE=1 SV=1	65	24.2	1.1	1.058	1.054	1.111	1.148
Q8WU90	Zinc finger CCCH domain-containing protein 15 OS=Homo sapiens GN=ZC3H15 PE=1 SV=1	4	48.6	0.853	0.985	0.867	0.853	0.907
Q8WU79	Stromal membrane-associated protein 2 OS=Homo sapiens GN=SMAP2 PE=1 SV=1	14	46.8	0.89	0.988	0.853	0.839	0.805
Q8WU76	Sec1 family domain-containing protein 2 OS=Homo sapiens GN=SCFD2 PE=1 SV=2	4	75.1	0.88	0.903	0.905	0.87	0.863
Q8WU20	Fibroblast growth factor receptor substrate 2 OS=Homo sapiens GN=FRS2 PE=1 SV=4	2	57	1.121	1.183	0.783	0.911	0.774
Q8WTX7	GATS-like protein 3 OS=Homo sapiens GN=GATSL3 PE=1 SV=1	3	36.3	0.844	1.38	1.173	0.969	0.51
Q8WTW4	Nitrogen permease regulator 2-like protein OS=Homo sapiens GN=NPRL2 PE=1 SV=2	2	43.6
Q8WTW3	Conserved oligomeric Golgi complex subunit 1 OS=Homo sapiens GN=COG1 PE=1 SV=1	2	108.9	1.002	0.997	1.039	1.356	1.463
Q8WTS6	Histone-lysine N-methyltransferase SETD7 OS=Homo sapiens GN=SETD7 PE=1 SV=1	10	40.7	1.134	1.15	1.122	1.259	1.433
Q8TF74	WAS/WASL-interacting protein family member 2 OS=Homo sapiens GN=WIPF2 PE=1 SV=1	24	46.3	0.986	0.977	0.964	0.833	0.905
Q8TF61	F-box only protein 41 OS=Homo sapiens GN=FBXO41 PE=2 SV=5	24	94.4	0.884	0.982	0.844	0.749	0.627
Q8TF44	C2 calcium-dependent domain-containing protein 4C OS=Homo sapiens GN=C2CD4C PE=1 SV=2	18	44.5	1.121	0.826	0.908	0.709	0.603
Q8TF42	Ubiquitin-associated and SH3 domain-containing protein B OS=Homo sapiens GN=UBASH3B PE=1 SV=2	2	72.6	0.544	0.685	0.605	0.572	0.491
Q8TF21-2	Isoform 2 of Ankyrin repeat domain-containing protein 24 OS=Homo sapiens GN=ANKRD24	12	132.3	0.988	0.924	0.921	0.987	0.815
Q8TF05	Serine/threonine-protein phosphatase 4 regulatory subunit 1 OS=Homo sapiens GN=PPP4R1 PE=1 SV=1	2	106.9	0.797	0.952	0.712	0.908	1.007
Q8TF01	Arginine/serine-rich protein PNISR OS=Homo sapiens GN=PNISR PE=1 SV=2	1	92.5	0.791	0.864	0.742	0.844	0.513
Q8TEY7	Ubiquitin carboxyl-terminal hydrolase 33 OS=Homo sapiens GN=USP33 PE=1 SV=2	2	106.7	0.821	1.003	1.142	1.125	0.947
Q8TEY4	Adaptor protein FE65a2 (Fragment) OS=Homo sapiens GN=APBB1 PE=2 SV=1	8	77.4	0.518	0.748	0.621	0.768	0.626
Q8TEV9	Smith-Magenis syndrome chromosomal region candidate gene 8 protein OS=Homo sapiens GN=SMCR8 PE=1 SV=2	8	105	1.033	0.933	0.956	0.851	0.802
Q8TEQ6	Gem-associated protein 5 OS=Homo sapiens GN=GEMIN5 PE=1 SV=3	4	168.5	0.91	0.975	0.881	0.97	0.841
Q8TEM1	Nuclear pore membrane glycoprotein 210 OS=Homo sapiens GN=NUP210 PE=1 SV=3	2	205
Q8TEH3	DENN domain-containing protein 1A OS=Homo sapiens GN=DENND1A PE=1 SV=2	16	110.5	1.002	1.014	0.946	0.871	0.855
Q8TED9	Actin filament-associated protein 1-like 1 OS=Homo sapiens GN=AFAP1L1 PE=1 SV=2	2	86.4	0.508	0.658	0.567	0.75	0.804
Q8TE73	Dynein heavy chain 5, axonemal OS=Homo sapiens GN=DNAH5 PE=1 SV=3	1	528.7	0.566	0.649	0.504	1.185	0.653
Q8TE49-2	Isoform 2 of OTU domain-containing protein 7A OS=Homo sapiens GN=OTUD7A	8	101.4	1.049	0.842	1.002	0.707	0.823
Q8TE02-4	Isoform 4 of Elongator complex protein 5 OS=Homo sapiens GN=ELP5	2	35.7	0.709	0.993	0.917	0.832	0.891
Q8TDZ2-4	Isoform 4 of [F-actin]-methionine sulfoxide oxidase MICAL1 OS=Homo sapiens GN=MICAL1	4	119.7	0.811	0.923	0.781	0.881	0.751
Q8TDY2	RB1-inducible coiled-coil protein 1 OS=Homo sapiens GN=RB1CC1 PE=1 SV=3	6	183	0.867	0.783	0.887	1.02	0.884
Q8TDW0	Volume-regulated anion channel subunit LRRC8C OS=Homo sapiens GN=LRRC8C PE=1 SV=2	4	92.4	0.817	1.423	0.866	0.947	1.128
Q8TDV0	Probable G-protein coupled receptor 151 OS=Homo sapiens GN=GPR151 PE=2 SV=1	2	46.6	1.404	1.269	1.341	1.134	0.961
Q8TDQ7	Glucosamine-6-phosphate isomerase 2 OS=Homo sapiens GN=GNPDA2 PE=1 SV=1	15	31.1	1.225	1.138	1.1	0.949	1.035
Q8TDN6	Ribosome biogenesis protein BRX1 homolog OS=Homo sapiens GN=BRIX1 PE=1 SV=2	2	41.4	1.099	1.016	1.117	1.002	1.107
Q8TDJ6-3	Isoform 3 of DmX-like protein 2 OS=Homo sapiens GN=DMXL2	162	339.5	0.789	0.867	0.808	0.722	0.639
Q8TDJ5	Tyrosine-protein kinase receptor OS=Homo sapiens GN=TFG/ALK fusion PE=2 SV=1	28	88.6	0.989	1.025	0.952	0.94	0.95
Q8TDG2	Actin-related protein T1 OS=Homo sapiens GN=ACTRT1 PE=2 SV=2	2	41.7	1.114	0.939	1.034	1.128	1.312
Q8TDC3-2	Isoform 2 of Serine/threonine-protein kinase BRSK1 OS=Homo sapiens GN=BRSK1	28	86.7	0.893	0.921	0.825	0.7	0.699
Q8TD55	Pleckstrin homology domain-containing family O member 2 OS=Homo sapiens GN=PLEKHO2 PE=1 SV=1	10	53.3	1.085	0.981	1.137	1.306	1.288
Q8TD22	Sideroflexin-5 OS=Homo sapiens GN=SFXN5 PE=1 SV=1	19	37.1	0.678	0.937	0.818	0.928	0.732
Q8TD16-2	Isoform 2 of Protein bicaudal D homolog 2 OS=Homo sapiens GN=BICD2	4	96.7	1.205	1.079	1.441	1.385	1.499
Q8TCZ8	Apolipoprotein E (Fragment) OS=Homo sapiens GN=APOE PE=4 SV=1	28	6.7	2.245	1.297	2.951	1.163	4.124
Q8TCZ2-5	Isoform 5 of CD99 antigen-like protein 2 OS=Homo sapiens GN=CD99L2	16	28.9	0.873	1.102	0.932	1.096	1.048
Q8TCZ2-3	Isoform 3 of CD99 antigen-like protein 2 OS=Homo sapiens GN=CD99L2	16	20.3	0.614	0.828	0.551	0.309	0.377
Q8TCU6	Phosphatidylinositol 3,4,5-trisphosphate-dependent Rac exchanger 1 protein OS=Homo sapiens GN=PREX1 PE=1 SV=3	14	186.1	0.983	1	0.937	1.004	1.002
Q8TCT9-2	Isoform 2 of Minor histocompatibility antigen H13 OS=Homo sapiens GN=HM13	18	46.8	0.907	0.987	0.936	0.94	0.947
Q8TCS8	Polyribonucleotide nucleotidyltransferase 1, mitochondrial OS=Homo sapiens GN=PNPT1 PE=1 SV=2	8	85.9	0.88	0.901	0.849	0.767	0.749
Q8TCJ2	Dolichyl-diphosphooligosaccharide--protein glycosyltransferase subunit STT3B OS=Homo sapiens GN=STT3B PE=1 SV=1	7	93.6	0.555	0.8	0.676	0.679	0.559
Q8TCG5	Carnitine O-palmitoyltransferase 1, brain isoform OS=Homo sapiens GN=CPT1C PE=1 SV=1	2	90.9	0.883	0.977	0.919	0.905	0.93
Q8TCF1	AN1-type zinc finger protein 1 OS=Homo sapiens GN=ZFAND1 PE=1 SV=1	2	30.8	0.788	0.304	0.573	0.364	0.481
Q8TCD5	5'(3')-deoxyribonucleotidase, cytosolic type OS=Homo sapiens GN=NT5C PE=1 SV=2	12	23.4	0.978	0.951	1.099	1.329	1.278
Q8TCD1	UPF0729 protein C18orf32 OS=Homo sapiens GN=C18orf32 PE=3 SV=1	14	8.7	1.228	1.318	1.079	1.173	1.295
Q8TCD0	Uncharacterized protein OS=Homo sapiens PE=1 SV=1	63	26.2	1.376	0.852	1.218	1.211	1.569
Q8TCC3-2	Isoform 2 of 39S ribosomal protein L30, mitochondrial OS=Homo sapiens GN=MRPL30	2	21.8	0.733	1.083	0.916	0.912	0.995
Q8TC84-3	Isoform 3 of Fibronectin type 3 and ankyrin repeat domains protein 1 OS=Homo sapiens GN=FANK1	2	41
Q8TC26	Transmembrane protein 163 OS=Homo sapiens GN=TMEM163 PE=2 SV=1	16	31.4	0.833	0.975	0.916	0.799	0.675
Q8TC12	Retinol dehydrogenase 11 OS=Homo sapiens GN=RDH11 PE=1 SV=2	18	35.4	0.982	1.019	0.965	0.858	0.941
Q8TC07-3	Isoform 3 of TBC1 domain family member 15 OS=Homo sapiens GN=TBC1D15	10	78.5	0.892	0.929	0.888	0.929	0.853
Q8TBX8	Phosphatidylinositol 5-phosphate 4-kinase type-2 gamma OS=Homo sapiens GN=PIP4K2C PE=1 SV=3	26	47.3	0.929	0.975	0.939	0.896	0.788
Q8TBP6	Solute carrier family 25 member 40 OS=Homo sapiens GN=SLC25A40 PE=1 SV=1	4	38.1	0.839	1.204	0.852	0.756	0.837
Q8TBM8	DnaJ homolog subfamily B member 14 OS=Homo sapiens GN=DNAJB14 PE=1 SV=1	7	42.5	0.906	1.048	0.913	0.823	0.835
Q8TBG9-2	Isoform 2 of Synaptoporin OS=Homo sapiens GN=SYNPR	24	31.3	1.093	1.016	1.12	1.1	0.897
Q8TBF8	Protein FAM81A OS=Homo sapiens GN=FAM81A PE=2 SV=3	4	42.4	0.74	0.78	0.799	0.705	0.516
Q8TBC5-3	Isoform 3 of Zinc finger and SCAN domain-containing protein 18 OS=Homo sapiens GN=ZSCAN18	6	60.8	0.767	0.646	0.735	0.504	0.313
Q8TBB6	Probable cationic amino acid transporter OS=Homo sapiens GN=SLC7A14 PE=2 SV=3	50	84	1.028	1.01	1.033	0.98	0.908
Q8TB96	T-cell immunomodulatory protein OS=Homo sapiens GN=ITFG1 PE=1 SV=1	16	68.1	0.873	1.005	0.902	0.974	0.91
Q8TB45	DEP domain-containing mTOR-interacting protein OS=Homo sapiens GN=DEPTOR PE=1 SV=2	2	46.3	0.735	1.002	0.766	1.147	0.762
Q8TB37	Iron-sulfur protein NUBPL OS=Homo sapiens GN=NUBPL PE=1 SV=3	5	34.1	0.817	0.914	0.745	0.733	0.594
Q8TB36	Ganglioside-induced differentiation-associated protein 1 OS=Homo sapiens GN=GDAP1 PE=1 SV=3	77	41.3	0.931	1.036	0.952	0.762	0.734
Q8TB22-2	Isoform 2 of Spermatogenesis-associated protein 20 OS=Homo sapiens GN=SPATA20	10	89.7	1.136	1.304	1.093	0.886	0.899
Q8TAT6-2	Isoform 2 of Nuclear protein localization protein 4 homolog OS=Homo sapiens GN=NPLOC4	20	69.4	1.003	0.951	1.003	0.875	0.948
[truncated: 4,855 more rows]

## Sheet: BW_TMT6_ReplicateC
Accession	Protein Description	# PSMs	MW [kDa]	Abundance Ratio: (F1, 127) / (F1, 126)	Abundance Ratio: (F1, 128) / (F1, 126)	Abundance Ratio: (F1, 129) / (F1, 126)	Abundance Ratio: (F1, 130) / (F1, 126)	Abundance Ratio: (F1, 131) / (F1, 126)
[truncated: 6,298 more rows]
